# Supplementary material
Source: publisher figshare collection journal article supplement (https://gsajournals.figshare.com/articles/dataset/_/6220109)
Supplement: Supplementary file 1 [file 1]

## Sheet: Sup. Table S1 - RNA-seq dataset
RNA-seq dataset of all annotated C. glabrata genes in the six samples subjected to sequencing. Data from 2 h and 4 h of wild-type C. glabrata are presented, as well as growth of a Cgthi3Δ strain for 4h in thiamine starvation and replete conditions. Logarithm transformed data and raw rpkm data for each C. glabrata gene are provided and sorted by the level of expression fold change in wild-type at …
log transformed data of rpm expression
sample 1 cells grown in SD with thiamine 2 hr
sample 2 cells grown in SD without thiamine 2 hr
sample 3 cells grown in SD with thiamine 4 hr
sample 4 cells grown in SD without thiamine 4 hr
sample 5 thi3D cells grown in SD with thiamine 4 hr
sample 6 thi3D cells grown in SD without thiamine 4 hr
Other ID	Gene Title	mean 1	mean 2	mean 3	mean 4	mean 5	mean 6
CAGL0F04631g	CAGL0F04631g	0.04972	0.37888	8.33157	8.73523	8.80872	9.28086
CAGL0G05269g	CAGL0G05269g	-0.467071	-0.395828	7.2705	8.6694	8.16011	8.53998
CAGL0J06402g	CAGL0J06402g	1.75374	1.46275	9.96676	11.2211	9.52822	9.24881
CAGL0D06380g	CAGL0D06380g	-6.48944	-5.1859	1.31859	0.418602	0.333375	0.873855
CAGL0M03421g	CAGL0M03421g	-4.90448	-3.1859	2.47702	1.91292	1.86758	1.81941
CAGL0B02651g	CAGL0B02651g	-1.36016	-1.48546	5.76094	6.75845	5.08271	5.12693
CAGL0G05632g	CAGL0G05632g	2.09928	2.28983	8.39841	9.53876	8.28092	10.1847
CAGL0L12342g	CAGL0L12342g	4.49427	4.63055	12.1203	11.5967	10.8502	10.8186
CAGL0G02563g	CAGL0G02563g	-1.24151	-1.31144	5.56313	5.61108	4.96564	5.92202
CAGL0K07337g	CAGL0K07337g	5.49462	6.8196	11.7033	12.8717	10.8833	11.7053
CAGL0K04609g	CAGL0K04609g	6.22373	6.27711	13.06	12.0416	13.1274	12.9584
CAGL0K07678g	CAGL0K07678g	2.10675	2.0203	9.01146	9.30213	8.00344	8.27389
CAGL0B03839g	CAGL0B03839g	4.07089	4.38142	11.3652	12.0388	9.5852	9.58236
CAGL0M11000g	CAGL0M11000g	0.304977	-0.279014	7.08725	7.14652	6.27476	7.07195
CAGL0K00170g	EPA22	-5.48944	-4.1859	0.720691	1.04009	0.024744	0.163361
CAGL0J03080g	CAGL0J03080g	1.77266	1.47706	7.74448	8.54073	7.70861	8.32471
CAGL0K08668g	MET28	1.70532	1.94681	8.67335	9.38178	6.8414	7.00263
CAGL0J04004g	CAGL0J04004g	3.64113	3.80467	9.86213	9.94422	9.70492	9.76294
CAGL0J00451g	CAGL0J00451g	1.96177	1.88377	5.74066	8.36478	8.8321	9.09147
CAGL0D05280g	CAGL0D05280g	4.88397	5.00062	11.2613	11.5732	10.2253	10.313
CAGL0L02321g	CAGL0L02321g	3.91995	3.92349	10.5765	10.7361	9.04245	8.97007
CAGL0M00374g	CAGL0M00374g	5.79191	5.87096	12.2631	12.7042	10.6754	10.8111
CAGL0G06050g	CAGL0G06050g	-2.58255	-3.1859	3.38468	3.72659	3.07993	3.27547
CAGL0H07469g	CAGL0H07469g	-0.046495	-0.084366	5.53914	5.78459	5.86343	5.58861
CAGL0M12551g	CAGL0M12551g	1.57126	1.28983	6.98672	7.43573	7.34866	7.56717
CAGL0A02002g	CAGL0A02002g	1.24527	0.680344	6.79621	7.46184	6.81414	7.13844
CAGL0H02101g	CAGL0H02101g	4.82061	4.57786	10.8684	10.5632	10.0246	10.0435
CAGL0K05687g	CAGL0K05687g	0.110474	0.262556	5.3093	5.9123	5.38391	5.72445
CAGL0G09086g	CAGL0G09086g	-6.48944	-5.77087	-0.488762	-0.855573	-1.42151	-0.974142
CAGL0J04202g	HSP12	6.19837	6.13696	11.2411	11.8911	11.4967	11.6336
CAGL0K06677g	MET8	2.03804	2.23195	8.10124	8.45472	6.39835	6.25468
CAGL0G05544g	CAGL0G05544g	4.85652	4.93217	10.007	10.2608	9.86954	10.2167
CAGL0F08261g	CAGL0F08261g	3.54674	3.29522	7.72442	9.17541	8.90915	9.35478
CAGL0M02915g	CAGL0M02915g	-0.360155	-1.12701	5.72707	4.52954	4.6617	4.66393
CAGL0K03421g	CAGL0K03421g	4.35448	4.16724	9.09238	9.56749	9.37164	9.74566
CAGL0K10164g	CAGL0K10164g	6.00542	6.11464	10.7361	11.547	10.9691	11.0009
CAGL0I02530g	CAGL0I02530g	5.34622	7.10833	10.2579	11.0707	9.08418	9.04736
CAGL0J11550g	CAGL0J11550g	3.68549	2.57343	7.67229	9.66808	9.08102	9.13844
CAGL0I08503g	CAGL0I08503g	3.61254	3.64064	9.11272	9.33554	7.64148	7.74506
CAGL0G01903g	MET1	2.72002	2.93477	7.98843	9.20339	6.59069	6.66264
CAGL0F07777g	CAGL0F07777g	5.35958	5.3357	9.91025	10.5603	10.0869	10.2347
CAGL0F00605g	GLK1	6.74478	6.72773	11.2807	11.456	11.4103	11.5937
CAGL0H10164g	CAGL0H10164g	0.823445	0.418958	5.56245	5.97938	5.12307	5.65554
CAGL0I05610g	CAGL0I05610g	1.97817	1.95023	6.46562	6.777	6.2989	6.93702
CAGL0B01595g	CAGL0B01595g	2.32755	3.93822	6.03602	8.21058	5.76336	6.19177
CAGL0K03459g	CAGL0K03459g	3.46476	3.3953	8.30138	8.06391	7.80821	8.04137
CAGL0D04026g	CAGL0D04026g	3.05166	2.95875	6.93737	8.70391	7.19228	7.73107
CAGL0D05082g	CAGL0D05082g	6.73682	6.65514	11.7641	11.3937	10.6713	10.8008
CAGL0G03289g	SSA3	6.16161	6.2203	10.3871	10.3446	10.605	10.902
CAGL0F04895g	CAGL0F04895g	7.08551	7.14221	11.5291	11.5667	11.1662	11.4855
CAGL0G01738g	CAGL0G01738g	4.52807	4.4877	8.7646	9.16311	8.66943	8.7793
CAGL0M05401g	CAGL0M05401g	0.182987	0.532914	3.51826	4.47305	5.13538	5.07559
CAGL0D06402g	MET15	7.26951	7.34751	12.2559	12.5816	10.6542	10.7135
CAGL0I03806g	CAGL0I03806g	6.06107	6.08244	10.7463	8.90226	10.8386	10.769
CAGL0G02849g	CAGL0G02849g	4.34424	4.50293	8.64301	8.81813	8.41118	8.50101
CAGL0B02563g	GIN3	6.05528	6.07991	9.88405	10.5324	10.1836	10.3785
CAGL0D03894g	CAGL0D03894g	4.0302	3.8309	7.74298	8.48939	8.1509	8.60902
CAGL0C03443g	LYS9	5.70962	5.77265	9.91073	11.3773	9.02013	9.2059
CAGL0J01331g	CAGL0J01331g	5.04827	5.14688	8.94208	9.44473	9.19145	9.31611
CAGL0A01870g	CAGL0A01870g	4.54123	4.56285	7.91857	8.64506	8.32769	9.82359
CAGL0I01276g	CAGL0I01276g	5.3817	5.34385	10.0049	10.3229	8.90767	8.80372
CAGL0G02585g	LYS12	3.51619	3.77988	7.41069	9.61066	6.84293	6.79154
CAGL0F08745g	CAGL0F08745g	6.51215	6.34564	11.2657	10.858	10.0889	10.2315
CAGL0M01166g	CAGL0M01166g	1.38093	8.82124	2.04651	11.4355	0.849017	1.61615
CAGL0H02387g	CAGL0H02387g	4.75016	4.81972	8.68406	8.89807	8.72595	8.80496
CAGL0B03817g	CAGL0B03817g	4.80403	4.95578	8.89835	8.97227	8.68305	8.77558
CAGL0F00869g	CAGL0F00869g	4.05069	4.0276	7.95709	8.24332	7.80959	8.03298
CAGL0E01837g	YPS9	5.92657	5.9466	9.51629	10.2031	9.77231	10.0482
CAGL0F06875g	CAGL0F06875g	5.24061	5.26668	9.11822	10.5954	8.42472	8.44774
CAGL0B02926g	BMT3	1.15442	1.55106	5.30159	5.09537	5.24808	4.93808
CAGL0C04587g	CAGL0C04587g	5.4731	5.5312	9.26179	9.85951	9.10887	9.25956
CAGL0K04631g	CAGL0K04631g	2.67043	2.46992	6.39979	6.84309	6.14111	6.90428
CAGL0M03377g	CAGL0M03377g	6.45088	6.55177	10.6249	10.3079	10.0691	10.2767
CAGL0L05720g	CAGL0L05720g	3.98427	4.1465	8.03173	7.95201	7.57093	7.86688
CAGL0B02475g	PHO84	2.60332	3.0154	6.30077	6.12914	6.83399	6.87983
CAGL0H02563g	CAGL0H02563g	4.70901	4.99732	8.77777	9.33534	8.04262	8.25884
CAGL0C00275g	HSP31	6.44794	6.48814	10.0071	10.4731	10.0617	10.534
CAGL0C05027g	CAGL0C05027g	4.06227	4.08478	8.20821	7.60376	7.94005	7.66433
CAGL0E05984g	CAGL0E05984g	1.6243	0.327165	3.8917	6.26771	5.78355	6.68708
CAGL0H04037g	CAGL0H04037g	3.37475	3.22349	6.95664	7.24918	6.78867	7.40774
CAGL0F04719g	CAGL0F04719g	5.90395	6.03185	9.68228	9.8618	9.35776	9.5917
CAGL0G04081g	CAGL0G04081g	3.29683	9.41936	4.96811	7.66762	4.37485	4.50698
CAGL0L06094g	STR3	4.35448	4.29657	8.88148	9.73623	6.60971	6.61699
CAGL0M11902g	CAGL0M11902g	4.86866	5.03689	8.0821	8.58737	8.50467	8.75419
CAGL0C02739g	CAGL0C02739g	5.0927	5.1266	8.37426	8.77514	8.71246	8.80445
CAGL0G06996g	CAGL0G06996g	-1.789	-1.37855	2.23234	2.08885	1.45623	1.65813
CAGL0M04763g	CAGL0M04763g	3.79365	3.91388	7.53776	7.54362	6.85018	7.28471
CAGL0G02717g	CAGL0G02717g	3.40841	3.51454	7.18664	7.20424	6.43849	6.70221
CAGL0M09020g	CAGL0M09020g	1.30498	1.25704	4.64181	4.41078	5.07714	4.92417
CAGL0L02079g	CAGL0L02079g	4.38861	4.36099	7.6262	9.62437	6.95461	7.1192
CAGL0B01875g	CAGL0B01875g	-1.53524	-2.6834	1.5987	3.55421	1.30641	2.27547
CAGL0G06006g	CAGL0G06006g	4.46549	4.50874	7.76213	8.23878	7.61658	7.99401
CAGL0A01243g	GIT1	6.37301	6.77313	10.1544	9.77298	9.80027	9.81071
CAGL0G02739g	CAGL0G02739g	-0.874729	-1.60094	4.59472	1.97083	2.43149	1.83779
CAGL0H08844g	CAGL0H08844g	7.03032	7.0032	10.9222	10.5331	9.92803	10.3038
CAGL0C04191g	CAGL0C04191g	6.06395	6.01479	9.4325	9.63935	9.21116	9.53616
CAGL0F04807g	CAGL0F04807g	5.17501	5.26083	8.44308	8.75313	8.31057	8.79169
CAGL0L02167g	CAGL0L02167g	3.08421	3.11483	5.93619	6.42746	6.62479	6.8572
CAGL0I07865g	CAGL0I07865g	5.22952	5.26702	8.39855	8.66489	8.65484	8.7044
CAGL0C04543g	CAGL0C04543g	4.20056	4.39026	7.66582	7.57614	7.47641	7.73084
CAGL0B01100g	CAGL0B01100g	3.94101	4.15913	7.39674	7.50147	7.12972	7.40485
CAGL0E05610g	CAGL0E05610g	7.99582	8.14422	11.4971	11.3597	11.2943	11.4223
CAGL0H04851g	CAGL0H04851g	3.98427	3.96215	7.00096	6.99035	7.50641	7.86282
CAGL0F07953g	CAGL0F07953g	1.41745	1.51454	5.39197	4.92273	4.10987	4.58861
CAGL0B01078g	CAGL0B01078g	3.80977	3.90773	7.1058	7.39467	6.64619	7.42227
CAGL0K10978g	CAGL0K10978g	5.28946	5.45524	8.63992	10.0865	7.80941	8.01113
CAGL0L12012g	CAGL0L12012g	3.05746	3.08088	6.36025	6.44204	6.19062	6.37557
CAGL0H03971g	CAGL0H03971g	5.00692	5.10219	8.64883	8.64858	7.6379	8.2454
CAGL0F07117g	CAGL0F07117g	4.00241	3.994	7.33898	7.19491	7.1454	7.37812
CAGL0G06710g	CAGL0G06710g	-5.48944	-5.1859	-1.31884	-1.69688	-3.28401	-2.5591
CAGL0M04675g	CAGL0M04675g	5.83615	5.86666	8.99051	9.23543	8.974	8.96844
CAGL0I05148g	DLD1	6.58537	6.62333	9.95595	9.68514	9.66636	9.85495
CAGL0C05071g	CAGL0C05071g	5.76795	11.6048	5.89359	13.237	5.44638	5.66135
CAGL0L07920g	CAGL0L07920g	5.41294	11.5872	5.40112	12.041	5.303	5.40128
CAGL0H02585g	CAGL0H02585g	7.04899	7.31875	9.85496	10.5869	10.1125	10.5168
CAGL0G08448g	THI7	5.50915	11.6359	5.85359	12.6961	5.61356	5.76942
CAGL0B02860g	CAGL0B02860g	5.87086	5.85233	9.04764	9.25392	8.80674	8.96596
CAGL0F05027g	CAGL0F05027g	2.32434	2.27898	5.44234	5.30406	5.43398	5.72753
CAGL0E01353g	CAGL0E01353g	6.44296	6.57924	8.52735	10.365	8.97603	10.4941
CAGL0L00473g	CAGL0L00473g	4.99287	4.95322	8.38886	8.12822	7.91215	8.02065
CAGL0G09977g	GDB1	6.32795	6.45554	9.64769	9.59278	9.20825	9.39913
CAGL0L04598g	CAGL0L04598g	6.21468	6.25583	9.26897	9.51706	9.17017	9.30591
CAGL0K07788g	CAGL0K07788g	5.93052	6.0391	8.80873	10.7096	8.34286	8.28581
CAGL0K08470g	CAGL0K08470g	-3.68208	-2.44894	-0.488762	-1.75828	-1.01552	-0.421601
CAGL0L06006g	CAGL0L06006g	4.27792	4.3166	7.69735	7.8625	6.69197	7.02561
CAGL0D00198g	CAGL0D00198g	3.08042	3.24176	5.87701	6.38926	6.00517	6.33773
CAGL0H09460g	CAGL0H09460g	3.74298	3.70689	6.46325	6.74244	6.9066	6.95883
CAGL0J11484g	DUG3	5.3478	5.19996	8.69188	9.66699	7.46563	7.7506
CAGL0E05654g	CAGL0E05654g	6.85222	6.84729	9.67123	9.56969	9.96872	10.1518
CAGL0E02651g	CAGL0E02651g	3.26878	3.11788	6.39254	6.71163	5.82831	6.17718
CAGL0A03740g	CAGL0A03740g	3.3001	3.39906	5.60168	6.43669	6.36001	6.77956
CAGL0D00902g	CAGL0D00902g	3.34661	3.59327	6.59239	7.25137	5.79013	5.86071
CAGL0B00990g	HBN1	3.68923	3.68651	8.32251	6.82276	5.62534	5.81622
CAGL0A00341g	CAGL0A00341g	3.6308	3.43248	6.72601	6.79531	6.37242	6.64237
CAGL0E06380g	CAGL0E06380g	4.34819	4.36996	7.32191	7.62618	7.01385	7.22105
CAGL0G05698g	CAGL0G05698g	5.25917	5.11445	8.4114	8.34564	7.90497	8.27684
CAGL0E05148g	CAGL0E05148g	6.12918	6.14781	9.30606	9.10695	8.78776	9.08655
CAGL0B04917g	CAGL0B04917g	5.56923	5.55641	8.47954	8.42298	8.66509	8.46871
CAGL0I08305g	CAGL0I08305g	4.72367	4.82159	8.20113	7.42207	7.60349	7.46113
CAGL0I09724g	CAGL0I09724g	4.1643	3.98068	7.68359	7.56169	6.67072	6.61964
CAGL0F02431g	CAGL0F02431g	5.67169	5.66792	8.3966	10.1532	7.92145	7.88529
CAGL0E01859g	YPS10	2.64755	2.82905	5.75292	5.3994	5.54167	5.69167
CAGL0K02629g	CAGL0K02629g	4.21447	4.23686	6.9006	7.25587	7.01478	7.31352
CAGL0M02387g	CAGL0M02387g	3.87031	3.92784	6.46743	6.91353	6.76942	6.92713
CAGL0A01716g	CAGL0A01716g	4.98224	5.00762	7.4301	7.89519	7.88506	8.078
CAGL0M08426g	CAGL0M08426g	5.35644	5.44588	8.43545	8.1767	8.13533	8.07389
CAGL0M06633g	CAGL0M06633g	4.52598	4.56508	7.2257	7.508	7.33663	7.3734
CAGL0L09273g	CAGL0L09273g	2.02231	1.97733	4.86052	4.67671	4.86574	4.96811
CAGL0M03465g	CAGL0M03465g	1.29192	1.34288	4.1342	4.27275	4.08787	3.94552
CAGL0I01100g	GCY1	6.81106	6.75441	9.25762	9.88146	9.5145	9.83513
CAGL0K04455g	CAGL0K04455g	-2.09712	-1.07043	1.30565	-0.015052	0.344022	0.118967
CAGL0J03058g	CAGL0J03058g	1.91144	2.16282	4.61256	4.69687	4.99338	4.74102
CAGL0I02134g	PEX21B	1.25875	1.39906	4.40984	4.11584	3.80249	3.99036
CAGL0M01694g	CAGL0M01694g	6.62153	6.66376	9.81105	9.56688	9.11721	9.15994
CAGL0I03168g	CAGL0I03168g	-0.149588	-0.37855	2.55563	2.74053	2.44885	3.00771
CAGL0K04301g	CAGL0K04301g	6.04097	6.12679	8.58801	8.90671	8.77321	9.08183
CAGL0L11902g	CAGL0L11902g	2.72245	2.76246	5.43047	5.55342	5.48928	5.54663
CAGL0C03872g	CAGL0C03872g	1.4472	1.75661	3.23234	4.95238	4.05098	4.93007
CAGL0I07249g	CAGL0I07249g	3.76204	4.22349	6.26529	6.84487	6.34369	7.07921
CAGL0M13651g	CAGL0M13651g	7.61843	7.69425	10.3998	10.6359	10.159	10.3761
CAGL0M12474g	CAGL0M12474g	2.51619	2.41896	5.17968	5.31249	5.22523	5.45287
CAGL0A02145g	CAGL0A02145g	2.47346	2.3166	5.00159	5.33884	5.00936	5.70737
CAGL0H01089g	CAGL0H01089g	6.32755	6.39215	9.42293	9.10052	8.83287	9.02068
CAGL0H10120g	CAGL0H10120g	3.96794	3.97481	6.69146	6.81174	6.55333	6.81347
CAGL0J09812g	TPS1	7.15205	7.29657	9.8112	10.0038	9.88812	10.0094
CAGL0B03311g	CAGL0B03311g	3.55496	3.49123	6.44234	6.42077	5.92655	6.45231
CAGL0G02937g	CAGL0G02937g	1.83699	1.94681	4.09808	4.02877	3.48297	6.79962
CAGL0C01397g	CAGL0C01397g	0.969993	1.57343	3.85331	4.38527	3.34004	3.82518
CAGL0L00649g	CAGL0L00649g	4.03216	4.15617	6.9279	6.98275	6.50745	6.65667
CAGL0I07425g	CAGL0I07425g	-1.53524	-1.31144	0.962449	1.1939	1.17542	1.57292
CAGL0K12958g	CAGL0K12958g	4.6437	4.63958	7.66819	7.27563	7.09606	7.35727
CAGL0G09108g	CAGL0G09108g	-1.90448	-1.64158	1.31859	1.24954	0.375501	0.452868
CAGL0B03223g	CAGL0B03223g	-6.48944	-3.60094	-3.48876	-3.69688	-4.42151	-6.466
CAGL0B01925g	CAGL0B01925g	3.86261	3.994	6.67347	7.05076	6.08032	6.49708
CAGL0K10868g	CTA1	7.03106	7.0907	9.53644	10.3428	9.29466	9.69261
CAGL0G07623g	CAGL0G07623g	8.60187	8.76526	11.213	11.8071	11.0585	11.1208
CAGL0E05962g	CAGL0E05962g	2.44425	2.88018	4.84886	5.35976	5.22631	5.33935
CAGL0E01881g	YPS11	5.50739	5.55809	7.75553	8.18628	8.17351	8.50245
CAGL0B00946g	CAGL0B00946g	6.30335	6.34108	8.8919	9.04023	8.78462	9.06542
CAGL0K07568g	PMU3	3.55632	8.8539	4.51967	10.9997	4.1702	4.24567
CAGL0K08536g	APE1	5.56381	5.67622	8.73607	8.06357	8.03207	7.99817
CAGL0C01771g	CAGL0C01771g	4.8921	5.0207	7.50134	7.83199	7.18739	7.57335
CAGL0K00231g	CAGL0K00231g	4.16072	4.34157	7.04518	7.29724	6.32903	6.53189
CAGL0A02343g	CAGL0A02343g	-2.789	-1.86398	0.418128	0.362018	-0.533987	-0.108443
CAGL0L09383g	CAGL0L09383g	6.13284	6.11254	8.38732	8.43439	8.90267	9.18163
CAGL0G07645g	CAGL0G07645g	-2.58255	-1.96351	0.140594	0.946981	-0.317176	-0.162215
CAGL0G05830g	CAGL0G05830g	7.61819	7.72393	10.1774	10.4181	10.151	10.1474
CAGL0L10582g	CAGL0L10582g	6.2535	6.28034	8.84443	8.94359	8.72855	8.79242
CAGL0F05929g	CAGL0F05929g	4.57934	4.48593	8.14548	7.83394	6.42742	6.27083
CAGL0J08316g	CAGL0J08316g	7.73592	7.58469	10.3616	11.0052	9.98715	10.0005
CAGL0K06853g	CAGL0K06853g	8.07554	8.00849	11.4343	10.9597	9.8776	10.327
CAGL0L06512g	CAGL0L06512g	0.417452	0.418958	3.23063	3.38705	2.41138	2.81709
CAGL0E04356g	CAGL0E04356g	7.28864	7.44959	9.96786	9.99652	9.71889	9.7548
CAGL0L03938g	CAGL0L03938g	5.2667	5.27762	7.85512	7.99086	7.4934	7.86057
CAGL0D06600g	CAGL0D06600g	5.24992	5.33406	7.58889	7.84777	7.71202	8.03217
CAGL0C04323g	CAGL0C04323g	4.09928	4.02517	6.20124	5.99312	6.89488	7.4483
CAGL0H08888g	CAGL0H08888g	5.0589	5.00557	7.45054	7.54888	7.55906	7.77241
CAGL0K11638g	CAGL0K11638g	-0.845582	-0.84013	2.02694	1.82669	0.998027	1.75317
CAGL0L04686g	CAGL0L04686g	2.64242	2.57565	5.38314	5.0812	4.94394	5.2082
CAGL0L03982g	CAGL0L03982g	4.85652	4.93174	7.4105	7.38094	7.2113	7.45742
CAGL0F07029g	MET13	7.44573	7.3298	9.90115	10.824	9.52106	9.61109
CAGL0M01562g	CAGL0M01562g	7.22588	7.21444	9.77131	9.67156	9.68169	9.74174
CAGL0G02101g	ECM4	7.65267	7.76574	10.1866	10.0547	10.1652	10.2394
CAGL0J09262g	CAGL0J09262g	3.11047	3.13151	5.83626	5.94608	5.03833	5.55394
CAGL0I04994g	MET6	10.5258	10.4315	13.2846	13.781	12.5874	12.444
CAGL0G08646g	CAGL0G08646g	4.0302	3.97481	6.58052	6.47534	6.42021	6.59369
CAGL0K12518g	CAGL0K12518g	4.88451	4.81363	7.18686	7.71428	7.19053	7.31987
CAGL0H10362g	CAGL0H10362g	5.09082	5.02152	7.4638	7.8212	7.33003	7.61881
CAGL0K02519g	CAGL0K02519g	3.74897	3.83646	5.84747	6.08612	6.44468	6.47835
CAGL0J05830g	CAGL0J05830g	2.58202	2.54428	4.95211	5.22	4.67862	5.28806
CAGL0J05060g	CAGL0J05060g	3.47779	3.58998	5.42898	6.54073	5.4293	6.39257
CAGL0I05874g	CAGL0I05874g	7.43426	7.35091	9.64291	9.79688	9.97334	10.0905
CAGL0M13189g	MSN4	5.36971	5.37475	7.49316	7.95111	7.75609	7.93715
CAGL0H02695g	CAGL0H02695g	5.81662	5.87028	8.58951	8.14049	7.96219	8.21403
CAGL0H03311g	CAGL0H03311g	1.74418	1.80656	4.54466	4.17143	3.71086	4.18864
CAGL0M10439g	CAGL0M10439g	5.96151	6.02477	8.40639	8.50866	8.20342	8.33834
CAGL0K10428g	CAGL0K10428g	-0.997585	-1.60094	1.2186	2.06689	0.991269	1.87385
CAGL0K08734g	CAGL0K08734g	4.84763	4.93822	7.56066	7.41654	6.94273	7.07679
CAGL0L06974g	CAGL0L06974g	6.73697	6.86802	9.29293	9.14321	9.038	9.09723
CAGL0F04851g	CAGL0F04851g	6.68236	6.73841	9.38341	8.96461	8.91725	9.0117
CAGL0L09086g	CAGL0L09086g	4.13627	4.09487	6.9049	6.40903	6.3297	6.40956
CAGL0H08778g	CAGL0H08778g	5.96563	5.98756	8.59081	8.14868	8.09635	8.50046
CAGL0C04213g	CAGL0C04213g	-1.48944	-1.44894	0.842154	1.05801	0.300954	1.28889
CAGL0M12793g	CAGL0M12793g	3.95764	3.78947	5.96528	6.84309	6.30726	6.28492
CAGL0G05357g	CAGL0G05357g	5.04292	4.9969	7.30464	7.60519	7.16035	7.49654
CAGL0K09218g	CAGL0K09218g	5.71269	5.87727	8.25492	8.0032	8.0177	8.08457
CAGL0K04719g	CAGL0K04719g	4.57396	4.67983	6.87688	6.97643	6.80225	7.07595
CAGL0L00957g	CAGL0L00957g	4.84651	5.01704	7.31698	7.58061	6.83458	7.14226
CAGL0H08261g	CAGL0H08261g	2.6295	2.58668	5.04018	4.93673	4.66648	5.21612
CAGL0M01408g	CAGL0M01408g	6.24252	6.17384	8.66933	8.32584	8.51538	8.82464
CAGL0K12254g	CAGL0K12254g	5.60629	6.05489	7.80306	8.43509	8.02531	7.90162
CAGL0M05665g	CAGL0M05665g	5.8426	5.91454	8.54887	8.15299	8.01489	7.98773
CAGL0J07612g	ZWF1	7.38131	7.52275	9.83213	9.96312	9.53968	9.58574
CAGL0J02508g	AWP1	4.73275	5.03084	6.67504	7.48169	7.17552	7.14029
CAGL0L00561g	CAGL0L00561g	-0.319513	-0.52294	2.79895	2.04009	1.62725	1.69388
CAGL0G01892g	CAGL0G01892g	3.21792	3.29118	5.43122	5.76835	5.43304	5.53295
CAGL0H09262g	CAGL0H09262g	1.0728	1.36868	3.70845	3.48137	3.25091	3.33975
CAGL0H02519g	CAGL0H02519g	6.31247	6.37028	8.8083	8.87772	8.34576	8.4545
CAGL0K07458g	CAGL0K07458g	6.94883	6.82881	9.01937	9.19854	9.33517	9.49428
CAGL0L04708g	CAGL0L04708g	6.68471	6.68639	8.98998	9.29727	8.75528	8.82787
CAGL0D06534g	CAGL0D06534g	-5.48944	-4.77087	-2.4013	-1.82241	-3.74344	-4.14407
CAGL0L11990g	CAGL0L11990g	1.71023	1.68446	3.4405	3.95776	4.65156	3.94233
CAGL0K06237g	CAGL0K06237g	6.01736	6.09641	8.35918	8.53269	8.02449	8.34468
CAGL0A04829g	CAGL0A04829g	7.88818	7.74908	10.2121	10.1334	10.1571	10.2957
CAGL0H00704g	CAGL0H00704g	5.77236	5.90685	7.7936	9.33391	7.41682	7.77696
CAGL0C04939g	CAGL0C04939g	4.25624	4.14725	6.78124	6.59698	6.38455	6.45715
CAGL0I02046g	CAGL0I02046g	3.95247	4.08478	6.59072	6.16654	6.03853	6.224
CAGL0D02134g	CAGL0D02134g	2.72731	2.6554	5.03969	5.18526	4.90177	4.92364
CAGL0F05071g	CAGL0F05071g	4.38938	4.31792	6.64229	6.54947	6.69691	6.77673
CAGL0F04697g	CAGL0F04697g	6.81762	6.81855	8.89791	9.07313	8.86712	9.44654
CAGL0C04609g	CAGL0C04609g	4.66285	4.73494	7.12779	6.95806	6.77324	6.87663
CAGL0J04884g	CAGL0J04884g	4.88723	4.83877	7.09102	7.15292	7.03689	7.31075
CAGL0E06292g	CAGL0E06292g	-2.03001	-1.77087	-0.079371	1.01278	-0.128731	0.32842
CAGL0C03740g	CAGL0C03740g	6.83291	6.55626	8.67936	9.04445	9.2344	9.64271
CAGL0F08085g	CAGL0F08085g	3.87251	3.72798	5.84327	6.0027	6.27006	6.50896
CAGL0F06325g	CAGL0F06325g	3.73577	3.91476	6.03651	6.12596	5.78184	6.13578
CAGL0D03982g	CAGL0D03982g	5.87278	5.98235	8.10492	8.15559	8.03083	8.25809
CAGL0G03773g	CAGL0G03773g	7.58629	7.73228	9.42737	10.1571	9.91966	9.91333
CAGL0B02882g	BMT2	3.95247	3.83461	6.25922	6.37593	5.77275	6.44183
CAGL0D04356g	CAGL0D04356g	4.84483	4.86213	7.18742	7.07873	6.88683	7.15365
CAGL0A01650g	CAGL0A01650g	5.77647	6.41664	7.7232	9.24601	7.83835	7.83964
CAGL0E00583g	CAGL0E00583g	5.58771	5.57565	8.38833	7.34547	7.82523	7.66667
CAGL0J06050g	CAGL0J06050g	10.1261	10.2139	12.2884	12.4753	12.3131	12.3739
CAGL0G04785g	CAGL0G04785g	-2.789	-2.44894	-0.934174	0.816194	-1.69905	-0.144067
CAGL0M10153g	CAGL0M10153g	-0.997585	-1.24731	1.76863	0.984948	1.01145	1.31536
CAGL0J07084g	CAGL0J07084g	5.15667	5.24071	7.33211	7.50596	7.34948	7.31976
CAGL0L06864g	CAGL0L06864g	5.244	5.00721	7.71543	7.59841	7.24436	7.44755
CAGL0B04323g	CAGL0B04323g	6.12596	6.1571	8.19916	8.39219	8.25078	8.39834
CAGL0D05456g	CAGL0D05456g	-5.48944	-4.77087	-2.9038	-2.82241	-3.93609	-2.88103
CAGL0E06072g	CAGL0E06072g	5.33433	5.43218	7.59903	7.32746	7.56476	7.6247
CAGL0M13255g	CAGL0M13255g	6.55752	6.5226	8.82957	8.82223	8.55591	8.73632
CAGL0L09108g	CAGL0L09108g	4.71819	4.6533	6.65446	6.67145	7.60058	6.65586
CAGL0D00704g	CAGL0D00704g	5.92525	5.98985	8.01351	8.1871	8.04022	8.15119
CAGL0E00803g	CAGL0E00803g	4.31711	4.72349	6.35162	6.69866	6.50122	6.72984
CAGL0J04268g	CAGL0J04268g	7.75478	7.86904	9.83325	9.64656	10.1345	10.1096
CAGL0K11858g	CAGL0K11858g	9.81668	9.93667	12.327	12.111	11.7241	11.8067
CAGL0H06545g	CAGL0H06545g	3.2554	3.06676	5.69394	5.28564	5.29685	5.49943
CAGL0K07590g	MYO3	5.54019	5.65592	7.69627	7.33655	7.78581	8.0046
CAGL0L00803g	CAGL0L00803g	3.31953	3.33242	5.25943	5.74607	5.14872	5.62445
CAGL0E01815g	YPS8	4.2084	4.2107	6.30138	6.22373	6.44901	6.33652
CAGL0I10054g	CAGL0I10054g	4.27045	4.30595	6.2973	6.38416	6.30573	6.57618
CAGL0E06688g	EPA3	-6.48944	-6.77087	-3.16683	-2.82241	-4.74344	-6.466
CAGL0C03245g	CAGL0C03245g	0.994377	1.20641	4.09055	2.98729	2.60529	2.93061
CAGL0E00649g	CAGL0E00649g	4.18033	4.2932	6.2398	6.57614	5.79378	6.63696
CAGL0D04686g	CAGL0D04686g	1.4472	1.3166	3.29096	3.61298	3.59752	3.82172
CAGL0H04983g	PSA1	6.02281	6.14464	8.04864	8.52883	8.00706	8.01587
CAGL0D03388g	CAGL0D03388g	6.61582	6.63547	8.95162	8.43873	8.68829	8.78863
CAGL0L03157g	CAGL0L03157g	1.75849	2.00062	4.10556	4.05355	3.74841	3.72876
CAGL0H06787g	CAGL0H06787g	4.86646	4.87209	6.43772	7.00962	7.10254	7.27705
CAGL0L12254g	CAGL0L12254g	6.41482	6.53277	8.20293	8.87409	8.4044	8.64897
CAGL0K03575g	CAGL0K03575g	3.76677	3.65435	5.92381	5.92059	5.70106	5.98676
CAGL0M02211g	PEP4	8.70405	8.73823	11.0844	10.8224	10.5906	10.7054
CAGL0M07744g	CAGL0M07744g	1.45893	1.4818	4.43382	3.2378	3.16195	3.35259
CAGL0A01606g	CAGL0A01606g	1.95351	2.16282	3.74725	4.65848	3.84995	4.07122
CAGL0K03267g	OPI1	6.87675	6.92925	8.9473	8.9616	8.82452	9.09833
CAGL0B04675g	CAGL0B04675g	2.2952	2.42881	4.33699	4.27083	4.59027	4.34859
CAGL0L07744g	CAGL0L07744g	5.14764	5.32288	7.23223	7.36876	7.1158	7.25852
CAGL0K04235g	CAGL0K04235g	7.50615	7.43836	9.26317	9.71086	9.53925	9.78612
CAGL0L08184g	FEN1	10.22	10.1992	12.5169	12.0408	12.1631	12.3613
CAGL0L05258g	CAGL0L05258g	1.63984	1.81033	3.38775	3.75159	3.7454	4.02084
CAGL0F02167g	CAGL0F02167g	0.125271	-0.002683	3.23746	2.04459	1.68282	1.81478
CAGL0G09064g	CAGL0G09064g	4.10675	4.01213	6.14764	6.16499	5.97702	6.38106
CAGL0C02365g	CAGL0C02365g	2.72002	2.72499	4.55084	4.81158	4.49437	5.0972
CAGL0E01749g	YPS4	0.748966	0.542016	3.19949	2.74883	2.56717	2.73613
CAGL0K05247g	CAGL0K05247g	2.24188	2.01704	4.43233	4.53274	4.07674	4.19222
CAGL0J08613g	CAGL0J08613g	3.81776	3.85484	6.02027	6.09754	5.41296	5.81767
CAGL0H06039g	CAGL0H06039g	0.343452	0.099498	2.98494	2.85771	1.71189	2.10006
CAGL0L04378g	CAGL0L04378g	5.84679	5.8141	8.05783	8.11135	7.5121	7.75045
CAGL0G09020g	CAGL0G09020g	6.1121	6.18133	8.31557	8.09232	8.02552	8.08895
CAGL0G03531g	CAGL0G03531g	3.43389	3.42389	5.21384	4.82995	6.00936	5.68025
CAGL0H00418g	CAGL0H00418g	5.70255	5.70689	7.74268	7.48552	7.7309	7.82143
CAGL0H09922g	CAGL0H09922g	-1.84558	-1.81667	0.56652	-0.304558	-0.043001	0.379495
CAGL0L05434g	SUN4	6.83362	7.08371	8.78947	8.65121	9.06936	9.00755
CAGL0B04059g	CAGL0B04059g	5.40954	5.39121	7.5187	7.23201	7.41059	7.42246
CAGL0K07524g	PMU1	6.12389	6.21782	8.08772	8.0799	8.06683	8.27952
CAGL0H02893g	CAGL0H02893g	5.22995	5.26359	7.41785	7.2804	6.96952	7.19667
CAGL0G07601g	CAGL0G07601g	8.48386	8.52052	10.5699	10.4467	10.3238	10.5031
CAGL0K10626g	CAGL0K10626g	6.14265	6.25514	8.4245	8.24515	7.78648	8.09266
CAGL0I09834g	CAGL0I09834g	0.814342	0.696739	3.30728	2.7923	2.44638	2.68629
CAGL0M05995g	CAGL0M05995g	7.08409	7.04011	9.53986	9.5106	8.38709	8.78778
CAGL0I05390g	CAGL0I05390g	6.95739	6.88343	8.85029	8.65866	9.07888	9.12407
CAGL0A04675g	CAGL0A04675g	3.26545	3.14501	5.43382	5.4186	4.9112	5.22444
CAGL0M05467g	CAGL0M05467g	3.63468	3.65435	5.44861	5.54193	5.61274	5.75891
CAGL0D02618g	PEX11	6.72351	6.73532	8.5764	8.62421	8.65841	8.84976
CAGL0G09515g	CAGL0G09515g	6.0186	6.00268	7.57674	7.95261	8.23035	8.11214
CAGL0M05951g	CAGL0M05951g	3.83474	3.81785	5.90087	5.66872	5.71522	5.8395
CAGL0E04548g	CAGL0E04548g	4.77207	4.84154	6.99316	6.73775	6.52759	6.644
CAGL0H01611g	CAGL0H01611g	5.06371	5.14911	6.97897	7.06841	7.00863	7.0246
CAGL0L00781g	MET30	4.8736	4.89047	7.30016	7.45678	6.19154	6.28073
CAGL0I01980g	CAGL0I01980g	5.54948	5.71873	7.74778	7.6991	7.22505	7.38273
CAGL0K00913g	CAGL0K00913g	6.957	6.89113	9.2685	9.55303	8.41537	8.32512
CAGL0I02596g	CAGL0I02596g	-2.789	-2.96351	-0.816337	-0.474483	-0.812703	-1.21807
CAGL0G05335g	TPS2	7.32564	7.29716	9.37489	9.28748	9.09241	9.22518
CAGL0M11242g	CAGL0M11242g	6.61892	6.6077	8.48301	8.77535	8.46399	8.38546
CAGL0G06424g	CAGL0G06424g	5.99815	5.97942	8.1222	8.46651	7.44407	7.5947
CAGL0M09042g	CAGL0M09042g	0.197062	-0.084366	2.63794	2.10618	1.65316	2.26871
CAGL0C03113g	CAGL0C03113g	6.81762	6.77083	8.75002	8.81743	8.60708	8.72903
CAGL0I09284g	CAGL0I09284g	4.44056	4.51454	6.27154	6.45372	6.25392	6.4036
CAGL0B02904g	BMT6	-0.222652	0.251501	2.3346	1.49952	1.59641	1.69891
CAGL0L10186g	CAGL0L10186g	5.7191	5.68523	7.4015	7.63637	7.6435	7.73682
CAGL0F07513g	CAGL0F07513g	4.20318	4.4477	5.83232	6.555	5.87357	6.27336
CAGL0K07546g	PMU2	4.23252	5.58806	5.00959	10.344	5.0416	5.811
CAGL0E06116g	CAGL0E06116g	4.25792	4.30928	6.04164	5.97938	6.05827	6.45473
CAGL0C01793g	CAGL0C01793g	5.37436	5.50293	7.41879	7.5232	7.03925	7.08427
CAGL0L08426g	SUE1	4.2837	4.31062	6.17502	6.18373	6.2062	6.00796
CAGL0L08888g	CAGL0L08888g	5.33353	5.39561	7.27258	7.32121	6.93802	7.26638
CAGL0A01826g	CAGL0A01826g	2.42942	2.06518	3.94587	4.48137	4.54081	4.50411
CAGL0H00572g	CAGL0H00572g	7.81313	7.83577	9.87462	9.59566	9.41373	9.78063
CAGL0E05170g	GRE2%28A%29	7.19334	7.22092	9.4083	8.82865	8.91133	9.03148
CAGL0M03245g	CAGL0M03245g	7.52196	7.33929	9.95987	10.0037	8.53921	9.13966
CAGL0L07766g	CAGL0L07766g	3.76441	3.66689	5.2889	5.32734	6.06532	5.83464
CAGL0I10582g	CAGL0I10582g	4.48999	4.5006	6.03357	6.5611	6.07354	6.66216
CAGL0A01284g	EPA10	2.04972	2.53747	4.1578	4.09754	3.67336	4.11049
CAGL0E05808g	THI6	5.45344	8.94131	5.49281	9.84841	5.11026	5.29556
CAGL0F02101g	CAGL0F02101g	3.88234	3.99068	5.83542	5.70862	5.84035	5.58589
CAGL0E06424g	CAGL0E06424g	8.02336	8.14734	9.74463	10.1868	9.83908	9.74052
CAGL0L08536g	CAGL0L08536g	-6.48944	-6.77087	-3.16683	-4.28184	-4.42151	-6.466
CAGL0B03465g	CAGL0B03465g	4.10208	4.13828	6.16431	6.09239	5.65904	5.81478
CAGL0J05126g	BNA3	7.8412	7.78982	10.541	10.1148	8.99198	9.03329
CAGL0J06028g	CAGL0J06028g	2.89858	2.90685	4.87647	4.45794	4.84481	4.68819
CAGL0F06061g	CAGL0F06061g	6.06371	6.03266	7.93881	7.96564	7.70067	7.93355
CAGL0H04543g	CAGL0H04543g	4.03216	3.92175	5.72008	5.98787	5.74616	6.03036
CAGL0I01122g	GRE3	7.74426	7.83102	9.49581	9.73279	9.50588	9.56895
CAGL0K05137g	CAGL0K05137g	5.27294	5.44315	7.10882	7.21776	7.04099	7.1295
CAGL0M07205g	CAGL0M07205g	5.13581	5.09564	6.93501	7.0145	6.87345	6.99548
CAGL0L02717g	CAGL0L02717g	5.05649	5.0031	6.88926	7.00717	6.6802	6.9239
CAGL0A00110g	EPA19	-5.48944	-3.96351	-3.9038	-6.28184	-2.93609	-3.14407
CAGL0B02695g	CAGL0B02695g	5.21835	5.16393	7.15408	6.94563	6.9848	7.0497
CAGL0F04191g	CAGL0F04191g	3.90288	4.07462	5.78736	6.11289	5.4374	5.64742
CAGL0A04433g	CAGL0A04433g	7.56271	7.57044	9.42443	9.28917	9.41744	9.3227
CAGL0J02552g	CAGL0J02552g	3.56991	3.89358	5.20951	5.67417	5.44762	5.42161
CAGL0F07007g	CAGL0F07007g	4.73697	4.80136	6.47684	6.98011	6.32651	6.37812
CAGL0F00649g	CAGL0F00649g	-0.279985	-0.413315	1.85997	1.57614	1.1453	1.57292
CAGL0M13541g	CAGL0M13541g	6.53829	6.40858	8.26941	8.0764	8.52408	8.53932
CAGL0L02827g	CAGL0L02827g	5.42793	5.33373	7.18984	7.18475	7.09093	7.46382
CAGL0K06105g	CAGL0K06105g	4.25959	4.25081	6.38641	6.24637	5.57538	5.95738
CAGL0D06512g	CAGL0D06512g	2.93263	2.87299	5.41135	4.54788	4.17319	4.75438
CAGL0B03619g	CAGL0B03619g	6.37649	6.45645	8.40908	8.35993	7.82701	8.07134
CAGL0B01947g	INO2	7.60933	7.64936	9.8132	9.03115	9.38588	9.32336
CAGL0G08624g	CAGL0G08624g	7.63606	7.62138	9.08379	9.79606	9.10075	9.62403
CAGL0I02904g	CAGL0I02904g	6.09082	6.17586	8.0294	7.73723	7.80598	7.9053
CAGL0M03135g	CAGL0M03135g	6.55291	6.55345	8.6823	8.04058	8.20875	8.3011
CAGL0C04719g	CAGL0C04719g	2.68549	2.83276	4.29751	4.72729	4.32332	4.55429
CAGL0F00891g	CAGL0F00891g	-3.90448	-3.1859	-1.48876	-1.69688	-2.49551	-2.21807
CAGL0L04836g	CAGL0L04836g	-6.48944	-4.1859	-4.9038	-4.69688	-5.15848	-6.466
CAGL0B02431g	CAGL0B02431g	7.03987	7.25202	8.6754	8.74525	8.97913	8.95771
CAGL0M07403g	OAZ1	5.38439	5.31427	7.01096	8.13331	6.65423	6.78104
CAGL0H02541g	CAGL0H02541g	5.08799	5.89713	7.02422	7.40225	6.90154	6.78045
CAGL0F08195g	CAGL0F08195g	2.8921	2.54202	5.38891	4.32549	4.54196	4.6048
CAGL0K03905g	CAGL0K03905g	-1.20404	-1.31144	1.0504	0.110479	0.354592	0.713914
CAGL0M09229g	CAGL0M09229g	5.83277	5.96828	7.46443	7.67671	7.71791	7.53286
CAGL0L05742g	CAGL0L05742g	5.81947	5.7527	7.40587	7.77336	7.36181	7.72599
CAGL0C00319g	CAGL0C00319g	8.49707	8.49413	10.0064	10.3607	10.1687	10.3468
CAGL0F00363g	OPI3	10.6538	10.6558	12.6603	12.2629	12.2895	12.2701
CAGL0K08624g	CAGL0K08624g	6.55154	6.85267	8.05197	8.28189	8.48515	8.55164
CAGL0G02189g	MTD1	4.68985	4.56005	6.56364	6.26289	6.47452	6.45119
CAGL0J02904g	CAGL0J02904g	3.77148	3.83183	5.35202	5.51461	5.44484	5.69514
CAGL0L09493g	CAGL0L09493g	3.8604	3.78372	5.75352	5.80131	5.16833	5.65002
CAGL0F08327g	CAGL0F08327g	3.58068	3.57897	5.17657	5.38838	5.12962	5.48055
CAGL0M13101g	CAGL0M13101g	4.37707	4.60743	6.25313	6.39015	5.84527	6.09744
CAGL0G05984g	CAGL0G05984g	0.04972	0.284415	2.1587	2.22596	1.11454	1.77241
CAGL0I09009g	CAGL0I09009g	5.23337	5.27045	7.21146	6.93203	6.87035	6.78726
CAGL0H10054g	CAGL0H10054g	3.69915	3.98736	5.48888	5.30312	5.52452	5.58351
CAGL0D00946g	CAGL0D00946g	1.94519	1.86576	3.45814	3.70685	3.6723	3.82633
CAGL0J03806g	CAGL0J03806g	5.80087	5.98026	7.53118	7.64964	7.47376	7.52907
CAGL0D06688g	ALD4	9.3035	9.22034	10.985	11.031	11.0561	11.0041
CAGL0J02046g	CAGL0J02046g	-6.48944	-6.77087	-4.9038	-3.95991	-5.15848	-4.88103
CAGL0A02233g	CAGL0A02233g	8.27222	8.17896	9.43823	10.1866	10.3007	10.0226
CAGL0G02057g	CAGL0G02057g	3.88451	4.01213	5.39044	5.37145	5.71214	5.93061
CAGL0M07634g	CAGL0M07634g	-0.845582	-0.84013	0.544661	0.826686	0.748413	1.22749
CAGL0J07040g	CAGL0J07040g	6.35938	6.47365	8.26519	7.93869	7.9857	8.08619
CAGL0L04818g	CAGL0L04818g	4.65331	4.5662	6.6447	6.2996	6.05908	6.39858
CAGL0E06666g	EPA2	-6.48944	-6.77087	-3.48876	-5.28184	-4.74344	-5.466
CAGL0I04444g	CAGL0I04444g	4.94363	4.98486	6.54861	6.50953	6.64148	6.78089
CAGL0A01366g	EPA9	2.17945	2.62574	4.11857	3.99545	3.63702	4.0751
CAGL0G06732g	CAGL0G06732g	8.3067	8.44508	10.1579	10.6436	9.63908	9.58653
CAGL0H09944g	CAGL0H09944g	5.70162	5.67466	7.63875	7.28517	7.21656	7.35049
CAGL0F07975g	CAGL0F07975g	4.80288	4.97439	6.71627	6.54332	6.3159	6.46141
CAGL0H03663g	CAGL0H03663g	3.45454	3.30728	4.95263	5.2205	5.06351	5.38184
CAGL0G05423g	HO	2.12527	2.08088	4.24256	3.56835	3.44762	3.91663
CAGL0M12969g	CAGL0M12969g	4.49427	4.41587	6.20712	6.19009	5.98767	6.25873
CAGL0B01743g	CAGL0B01743g	3.1652	3.19492	4.92487	4.71322	4.7449	4.88329
CAGL0M08184g	STE3	3.41294	3.34288	5.2056	5.18475	4.77078	5.12973
CAGL0J00187g	CAGL0J00187g	6.47995	6.44224	8.36211	8.28124	7.8279	8.04236
CAGL0L05786g	CAGL0L05786g	3.57126	3.60526	4.92328	4.68683	5.72238	5.53612
CAGL0G05522g	CAGL0G05522g	-4.90448	-5.77087	-2.9038	-2.95991	-3.57352	-2.76556
CAGL0M09207g	CAGL0M09207g	2.83924	2.88198	4.66289	4.42552	4.40058	4.45212
CAGL0J08591g	CAGL0J08591g	6.93171	6.97502	8.68835	8.67776	8.38524	8.53673
CAGL0M13937g	CAGL0M13937g	5.11974	5.18333	6.72616	6.93157	6.56148	6.83336
CAGL0D01496g	CAGL0D01496g	4.68049	4.72299	6.56364	6.21352	6.23384	6.26214
CAGL0M08228g	CAGL0M08228g	3.37629	3.48534	4.86494	5.05801	4.87403	5.32395
CAGL0H06699g	CAGL0H06699g	6.2692	6.40609	7.86335	7.89192	7.94218	8.01839
CAGL0K01353g	CAGL0K01353g	6.05117	6.02922	7.78058	7.7164	7.56412	7.66047
CAGL0C04933g	CAGL0C04933g	2.46185	2.34548	4.59804	4.17452	3.73533	3.94446
CAGL0J09020g	CAGL0J09020g	4.64819	4.55725	6.19599	6.27491	6.18341	6.5068
CAGL0F03817g	CAGL0F03817g	6.56092	6.53091	8.38261	8.09279	7.98416	8.28994
CAGL0A00957g	PEX23B	5.14492	5.21426	6.73237	6.79948	6.75254	6.82977
CAGL0J03674g	CAGL0J03674g	5.94779	5.95023	7.61313	7.56463	7.46784	7.61024
CAGL0J09240g	LYS21	8.30381	8.21577	9.73001	11.1965	9.5131	9.32367
CAGL0I05934g	CAGL0I05934g	5.44351	5.55641	6.77993	6.94427	7.27945	7.31884
CAGL0K10846g	CAGL0K10846g	4.44794	4.55781	6.32942	6.14154	5.95114	5.91257
CAGL0I06050g	INO1	12.4422	12.4692	14.1891	13.9609	14.0103	14.0678
CAGL0H04873g	CAGL0H04873g	4.63468	4.48121	5.97731	6.14312	6.2585	6.74193
CAGL0J07018g	CAGL0J07018g	4.32354	4.22984	6.06439	6.00241	5.73027	6.0153
CAGL0G05049g	CAGL0G05049g	6.40614	6.456	8.41069	7.89426	7.91494	7.87184
CAGL0M03157g	CAGL0M03157g	5.95532	5.96427	7.63423	7.71437	7.32273	7.54628
CAGL0B01969g	CAGL0B01969g	2.07662	2.36099	4.16856	3.68683	3.38197	3.7398
CAGL0I01870g	PEX24	2.53847	2.61068	3.93855	4.35388	3.80923	4.49979
CAGL0M00880g	CAR2	6.59055	6.66767	8.87544	7.76673	8.11313	8.05223
CAGL0I08943g	CAGL0I08943g	-0.319513	0.15987	0.92909	2.04009	1.10205	1.4882
CAGL0J09306g	CAGL0J09306g	7.28689	7.28221	8.89959	8.8955	8.87575	8.81064
CAGL0K08756g	CAGL0K08756g	3.8493	3.88377	5.17168	5.45075	5.58439	5.53752
CAGL0D02464g	CAGL0D02464g	4.96383	4.96172	6.86714	6.31645	6.37858	6.5898
CAGL0H07601g	CAGL0H07601g	0.291921	0.604172	1.90784	1.98962	1.65316	2.2205
CAGL0I07909g	CAGL0I07909g	6.17967	6.30428	8.03664	7.601	7.83021	7.65254
CAGL0I05896g	YAK1	5.52528	5.52949	6.9512	7.08953	6.97134	7.33561
CAGL0K09900g	HAP5	2.94101	3.08244	4.2434	4.73079	4.50389	4.65619
CAGL0H08063g	CAGL0H08063g	4.00941	3.88734	5.32382	5.69114	5.52393	5.84519
CAGL0G06446g	CAGL0G06446g	-1.40198	-1.72647	0.978843	0.257321	-0.251587	-0.056605
CAGL0H07359g	PHO8	6.83502	6.83947	8.59998	8.22416	8.40305	8.32725
CAGL0L01925g	UGP1	8.2284	8.28331	9.92538	9.84909	9.56939	9.83368
CAGL0L06600g	NAS6	5.52876	5.53491	7.28035	7.14285	6.86931	7.03348
CAGL0K02277g	CAGL0K02277g	5.18387	5.34872	6.22656	6.74313	7.10967	7.02159
CAGL0B02453g	CAGL0B02453g	4.53154	4.68446	6.27113	6.06024	6.06432	6.06928
CAGL0K08030g	CAGL0K08030g	6.64306	6.65015	8.20462	8.27838	8.01967	8.23791
CAGL0B02948g	BMT4	2.53847	2.6193	4.69425	4.00009	3.71906	3.97487
CAGL0M00550g	CAGL0M00550g	5.09458	5.09718	6.93278	7.14298	6.1325	6.32415
CAGL0H00528g	CAGL0H00528g	3.0124	2.90333	4.64309	4.48303	4.53035	4.65359
CAGL0J11836g	CAGL0J11836g	6.35114	6.38695	7.90436	7.9672	7.98963	7.72815
CAGL0D00990g	CAGL0D00990g	3.6295	3.59655	5.45741	5.38572	4.88774	4.95396
CAGL0G06842g	CAGL0G06842g	5.32874	5.55753	6.97323	6.92319	6.83929	6.93954
CAGL0L02519g	CAGL0L02519g	4.41067	4.44891	6.27756	5.98495	5.63051	5.9006
CAGL0G05962g	CAGL0G05962g	5.32394	5.337	6.91797	6.85018	6.89613	6.75287
CAGL0G04829g	CAGL0G04829g	4.47418	4.35519	6.24425	6.23731	5.61796	6.01732
CAGL0M06611g	CAGL0M06611g	6.34385	6.33012	8.5333	7.86274	7.41493	7.67003
CAGL0K07480g	PGM1	7.49933	7.47573	9.21822	9.13802	8.66651	9.06426
CAGL0C05489g	CAGL0C05489g	5.23593	5.11788	6.96399	6.81521	6.52247	6.8197
CAGL0C00539g	CAGL0C00539g	6.10372	6.17878	7.59605	7.67925	7.48921	7.77852
CAGL0H09966g	CAGL0H09966g	2.87031	2.86576	4.67111	4.25149	4.35591	4.25767
CAGL0H10032g	PST2	5.86674	6.02456	7.65438	7.49439	7.26814	7.24911
CAGL0M08734g	CAGL0M08734g	5.40614	5.41803	6.86879	6.88527	6.80923	7.1086
CAGL0C03069g	CAGL0C03069g	6.68315	6.71207	8.34837	8.22676	8.0846	8.13316
CAGL0K09372g	CAGL0K09372g	6.27668	6.20552	7.79244	7.42044	8.07714	7.9123
CAGL0C05555g	CAGL0C05555g	3.82231	3.90067	5.6096	5.37414	5.1657	5.21568
CAGL0K03443g	YKU80	4.48641	4.52949	6.13283	6.19415	5.77448	5.87969
CAGL0L03135g	CAGL0L03135g	4.16072	4.46455	5.78212	5.89153	5.55777	5.70706
CAGL0L09999g	CAGL0L09999g	3.11604	3.14501	4.58136	4.67744	4.38391	4.84177
CAGL0D01782g	CAGL0D01782g	4.98071	5.21034	6.67426	6.62054	6.42617	6.39684
CAGL0L10043g	CAGL0L10043g	6.85874	6.90487	8.06156	8.27527	8.48587	8.62317
CAGL0E01793g	YPS6	6.16206	6.17549	7.33679	7.64297	7.81767	7.82697
CAGL0E05588g	CAGL0E05588g	5.05021	4.99483	6.85761	6.48531	6.29514	6.57993
CAGL0J09284g	CAGL0J09284g	3.47779	3.36099	4.84047	4.9726	4.9557	5.22094
CAGL0I00924g	CAGL0I00924g	6.48927	6.52189	8.02964	7.9597	7.95857	7.99472
CAGL0I10200g	PWP3	-2.90448	-3.1859	-1.13121	-1.47448	-1.49551	-1.29607
CAGL0H03399g	CAGL0H03399g	9.24979	9.4056	10.8203	10.7637	10.659	10.8377
CAGL0D00352g	CAGL0D00352g	4.07947	4.22631	5.76213	5.29134	5.65931	5.67547
CAGL0A01089g	CAGL0A01089g	2.8615	3.02841	3.98798	3.98612	4.71343	4.83092
CAGL0G06622g	CAGL0G06622g	5.23891	5.34613	6.89629	6.44012	6.76349	6.85636
CAGL0B00770g	AUT4	6.08752	6.06281	7.73003	7.59477	7.37825	7.562
CAGL0G03883g	CAGL0G03883g	7.54355	7.33937	8.86283	9.07007	8.85234	9.47849
CAGL0J08547g	CAGL0J08547g	3.79596	3.87839	5.32422	5.23386	5.24985	5.32517
CAGL0I09702g	CAGL0I09702g	6.48677	6.42204	7.89609	7.8124	7.94574	8.22438
CAGL0M04499g	CAGL0M04499g	2.09552	2.38142	3.50842	3.45287	3.41643	4.15606
CAGL0I02024g	OYE2	1.58738	1.70487	3.66098	2.98729	2.77226	2.90904
CAGL0G06160g	CAGL0G06160g	-3.16751	-2.96351	-0.788323	-2.11191	-1.88546	-1.82214
CAGL0I08151g	CAGL0I08151g	2.26878	2.31394	4.03186	3.94938	3.43024	3.55081
CAGL0D01100g	CAGL0D01100g	5.68299	5.64646	7.31738	7.13891	6.99243	7.12868
CAGL0L06292g	CAGL0L06292g	6.69466	6.76368	8.38305	8.12204	8.0333	8.11526
CAGL0K10824g	CAGL0K10824g	3.93263	3.9545	4.97016	5.54113	5.4044	5.6208
CAGL0L03267g	CAGL0L03267g	2.69047	2.69877	4.23405	3.8096	4.40249	4.10481
CAGL0A01045g	CAGL0A01045g	6.95919	7.2022	8.36654	8.32994	8.71532	8.43558
CAGL0L04400g	CAGL0L04400g	5.97358	6.02395	7.51317	7.33414	7.43903	7.40032
CAGL0M08558g	CAGL0M08558g	-0.489438	-0.770867	1.34413	0.984948	0.715991	1.01782
CAGL0E05632g	CAGL0E05632g	5.44315	5.40312	6.77934	6.54372	7.22693	6.99395
CAGL0M03399g	CAGL0M03399g	5.65967	5.6236	7.51458	7.02607	6.80237	7.05364
CAGL0B04587g	CAGL0B04587g	7.43212	7.3971	9.11643	8.44555	9.03184	8.88677
CAGL0F02255g	CAGL0F02255g	3.81776	3.79042	5.13786	5.33241	5.20566	5.33571
CAGL0A03498g	CAGL0A03498g	4.8069	4.94938	6.59322	6.21202	5.94284	6.33369
CAGL0M04565g	CAGL0M04565g	5.41407	5.38269	7.02114	6.66361	6.79717	6.91406
CAGL0J04290g	CAGL0J04290g	0.543985	0.943379	2.06966	2.25732	1.88227	2.06539
CAGL0G09625g	CAGL0G09625g	-3.90448	-2.60094	-3.02933	-1.95991	-2.35112	-2.14407
CAGL0I06424g	CAGL0I06424g	6.59935	6.4477	8.35697	7.88957	7.92206	8.02792
CAGL0L08932g	LSP1	9.50807	9.51583	11.0782	11.0589	10.6531	10.895
CAGL0A01584g	CAGL0A01584g	2.04584	2.22065	3.27445	3.85387	3.33871	3.52269
CAGL0J09900g	CAGL0J09900g	8.67896	8.84852	10.0389	10.1304	10.1693	10.1765
CAGL0K05813g	CAGL0K05813g	9.53929	9.51016	11.1255	10.886	10.8897	10.9143
CAGL0D02420g	CAGL0D02420g	2.61122	2.54428	4.00609	4.10941	3.885	4.10954
CAGL0L01045g	CAGL0L01045g	-2.58255	-2.96351	-1.58187	-1.15255	-0.962081	-0.658641
CAGL0J00253g	CAGL0J00253g	6.34681	6.18769	7.64919	7.3866	8.08524	8.00968
CAGL0M03025g	CAGL0M03025g	2.29192	2.37379	3.7023	3.57459	3.72315	3.83207
CAGL0J00803g	CAGL0J00803g	4.93578	5.25738	6.55751	6.42552	6.23473	6.42351
CAGL0M11088g	CAGL0M11088g	1.42942	1.64276	3.13877	2.71252	2.6891	2.96655
CAGL0C03553g	CAGL0C03553g	3.67923	3.84935	4.91212	5.10456	5.12345	5.32191
CAGL0J06336g	CAGL0J06336g	4.84707	4.90333	6.38487	5.9937	6.21185	6.42844
CAGL0G08932g	CAGL0G08932g	5.20231	5.08711	6.98418	6.69347	6.20766	6.56932
CAGL0L08338g	CAGL0L08338g	5.42382	5.36163	7.06691	6.78744	6.49123	6.93235
CAGL0G01474g	CAGL0G01474g	5.4839	5.51511	6.77817	6.59103	7.00045	7.11685
CAGL0A04081g	CAGL0A04081g	6.56618	6.74779	7.73214	8.0711	8.08291	8.07685
CAGL0J07568g	CAGL0J07568g	8.13781	8.11206	9.26719	9.68318	9.28708	9.83807
CAGL0J08976g	CAGL0J08976g	3.20405	3.33896	4.80413	4.78761	4.31455	4.54173
CAGL0L04268g	CAGL0L04268g	5.62463	5.67622	7.40198	6.96104	6.80201	6.88176
CAGL0F03839g	CAGL0F03839g	7.33423	7.35761	8.76061	8.65521	8.47849	8.95341
CAGL0F02717g	PDH1	4.95558	5.0533	6.58588	6.55263	6.12326	6.13113
CAGL0E01177g	CPR1	9.44637	9.55723	10.6405	10.922	10.9881	10.816
CAGL0A00737g	CAGL0A00737g	2.74178	2.70081	4.02497	4.11904	4.24737	4.07413
CAGL0G08712g	CAGL0G08712g	8.60208	8.83105	9.98088	9.87158	10.0692	10.1619
CAGL0H06259g	CAGL0H06259g	5.8777	5.94166	7.37397	7.21875	7.15308	7.26352
CAGL0D03278g	CAGL0D03278g	5.07804	5.10872	6.75857	6.30077	6.33488	6.3793
CAGL0M13761g	CAGL0M13761g	7.2554	7.2737	8.73486	8.45557	8.5501	8.7217
CAGL0D02728g	CAGL0D02728g	5.37087	5.3658	6.97272	6.46615	6.72569	6.73582
CAGL0G06072g	CAGL0G06072g	5.94519	5.97102	7.27973	7.36798	7.18822	7.36125
CAGL0B02387g	CAGL0B02387g	3.24527	3.44102	4.57193	4.49295	4.64619	4.85311
CAGL0H01177g	CAGL0H01177g	5.62788	5.61796	6.88043	7.21064	6.74302	7.07341
CAGL0F05841g	CAGL0F05841g	2.04584	2.03649	3.60003	3.51258	3.1192	3.33814
CAGL0L11440g	CAGL0L11440g	7.03241	7.14296	8.52434	8.53254	8.26818	8.29186
CAGL0J06820g	CAGL0J06820g	5.91491	5.91804	7.55213	7.19352	7.02392	7.26352
CAGL0H04125g	CAGL0H04125g	8.06611	8.05474	9.31029	9.65243	9.34259	9.33265
CAGL0H05291g	MUK1	6.06563	5.97102	7.61075	7.09374	7.39075	7.61765
CAGL0H02717g	CAGL0H02717g	0.72973	1.15395	2.49423	2.36921	1.74038	2.0809
CAGL0B00814g	CAGL0B00814g	6.03877	5.99318	7.52107	7.55618	7.15526	7.30549
CAGL0M01848g	CAGL0M01848g	4.13536	4.25635	5.603	5.67816	5.26359	5.44427
CAGL0D03608g	CAGL0D03608g	2.47346	2.30862	4.12226	3.79498	3.60196	3.86156
CAGL0D05940g	ERG1	7.78363	7.90388	8.89976	8.91265	9.30834	9.43829
CAGL0E06006g	CAGL0E06006g	5.43054	5.44891	6.94247	6.75055	6.59655	6.74635
CAGL0F08767g	CAGL0F08767g	-3.48944	-3.44894	-0.996909	-1.37495	-2.65598	-1.94243
CAGL0J09394g	CAGL0J09394g	6.7047	6.69176	8.3208	7.8983	7.84598	8.00346
CAGL0K11275g	CAGL0K11275g	5.70255	5.58943	7.21211	7.02066	6.82558	7.09003
CAGL0J08294g	CAGL0J08294g	7.05033	8.12967	7.99114	9.41431	8.39986	8.4176
CAGL0G03223g	CAGL0G03223g	4.64755	4.72049	6.27383	5.86155	5.77251	5.96289
CAGL0I07139g	CAGL0I07139g	7.69699	7.7741	9.03504	9.06093	8.90862	9.06475
CAGL0E04884g	CAGL0E04884g	6.21057	6.28915	7.70114	7.39213	7.47399	7.5377
CAGL0M06347g	CAGL0M06347g	6.36738	6.34466	7.748	7.62289	7.57468	7.72938
CAGL0L01177g	FRDS1	6.57984	6.54187	8.07682	7.82865	7.67948	7.94657
CAGL0B02838g	MUP1	8.67413	8.61223	11.7764	11.9917	9.06505	9.48447
CAGL0K01133g	CAGL0K01133g	6.54123	6.59477	7.83366	7.82252	7.83776	7.87643
CAGL0D05918g	ATF2	5.09129	5.21497	6.28664	6.33609	6.51821	6.49979
CAGL0I04620g	CAGL0I04620g	6.43778	6.41416	8.01587	7.75819	7.52196	7.62643
CAGL0M08492g	PIR3	10.974	11.0345	12.1998	12.1084	12.3447	12.4506
CAGL0L08448g	CAGL0L08448g	9.06167	9.08568	10.4166	10.5089	10.1042	10.3854
CAGL0M09493g	CAGL0M09493g	1.89858	2.21213	3.34571	3.25926	3.04935	3.39199
CAGL0I00506g	CAGL0I00506g	5.10349	5.21853	6.4638	6.16525	6.60487	6.43317
CAGL0A04301g	CAGL0A04301g	5.98958	6.12281	7.4628	7.38361	7.12702	7.25371
CAGL0H03135g	MFalpha	2.09928	2.13602	3.8001	3.29748	3.16645	3.29389
CAGL0F00319g	CAGL0F00319g	5.30782	5.2629	6.91545	6.48552	6.50003	6.496
CAGL0F03707g	CAGL0F03707g	6.64178	6.65932	7.82007	7.70249	8.02789	8.15193
CAGL0I04048g	CAGL0I04048g	2.47923	2.53747	4.04262	3.64742	3.57171	3.81825
CAGL0E05786g	CAGL0E05786g	4.2911	4.28374	5.60399	5.78459	5.32029	5.56639
CAGL0M03971g	CAGL0M03971g	4.0114	3.86666	6.29403	6.82423	4.97338	5.11991
CAGL0I07887g	CAGL0I07887g	4.63791	4.52318	6.13146	5.9649	5.68649	5.97747
CAGL0D04092g	DOG2	6.85832	6.66779	8.13535	8.07103	8.42625	8.07528
CAGL0G09603g	CAGL0G09603g	7.00041	6.91355	8.23132	8.01048	8.44619	8.46178
CAGL0I02420g	CAGL0I02420g	4.28535	4.15765	5.79317	5.51461	5.4246	5.58623
CAGL0D06006g	CAGL0D06006g	4.79075	4.7794	5.91665	6.09075	5.97081	6.22422
CAGL0H01837g	CAGL0H01837g	4.05263	4.0801	5.28973	5.21502	5.30607	5.42199
CAGL0C00671g	CAGL0C00671g	4.7573	4.82672	6.08536	5.86218	6.01332	6.12833
CAGL0L03377g	CAGL0L03377g	2.29846	2.53063	3.5529	3.45287	3.55806	3.85255
CAGL0H01309g	CAGL0H01309g	6.22717	6.4653	7.56092	7.58283	7.53537	7.4564
CAGL0L00737g	CAGL0L00737g	6.3385	6.35616	7.41342	7.94224	7.38681	7.6164
CAGL0D01584g	CAGL0D01584g	4.63597	4.6058	5.8792	5.73532	5.85624	6.08427
CAGL0J03608g	CAGL0J03608g	4.31711	4.47171	5.49138	5.41296	5.59641	5.90169
CAGL0I06094g	FBP26	5.90261	5.91454	7.44815	7.08721	6.93075	7.13275
CAGL0M03003g	CAGL0M03003g	2.05359	2.15395	3.74725	3.05801	3.22954	3.24825
CAGL0D04972g	CAGL0D04972g	6.09998	6.13038	7.54147	7.22645	7.27049	7.36016
CAGL0E06512g	CAGL0E06512g	6.31247	6.2132	7.63139	7.61345	7.45278	7.61873
CAGL0L07898g	CAGL0L07898g	3.59005	3.68343	4.87044	4.85515	4.79475	4.88439
CAGL0G01716g	CAGL0G01716g	5.69327	5.73544	6.86893	6.96	6.91064	7.02335
CAGL0M08250g	CAGL0M08250g	7.03926	7.007	8.17968	8.36742	8.06949	8.51798
CAGL0H06633g	CAGL0H06633g	3.02823	2.87118	4.55427	4.38172	4.13231	4.14503
CAGL0D05808g	CAGL0D05808g	7.42439	7.41254	8.85948	8.51222	8.62298	8.64318
CAGL0I01386g	CAGL0I01386g	5.54742	5.64117	6.82738	6.81537	6.68897	6.87469
CAGL0M12947g	PUP1	3.7703	3.65959	4.99656	5.03444	4.78989	5.29389
CAGL0E04004g	CAGL0E04004g	6.91756	6.73122	8.95454	9.61808	7.57086	7.93728
CAGL0G08063g	CAGL0G08063g	4.47923	4.45072	5.96296	5.58351	5.67283	5.61249
CAGL0K07755g	CAGL0K07755g	2.40841	2.17165	3.99505	3.463	3.76534	3.53118
CAGL0C05137g	CAGL0C05137g	8.90103	8.97662	9.90873	10.1715	10.2514	10.2277
CAGL0K08932g	CAGL0K08932g	3.42793	3.33242	4.87865	4.56835	4.44762	4.78371
CAGL0L03894g	CAGL0L03894g	-2.03001	-1.3446	-0.184982	-0.95991	-0.514622	-0.911407
CAGL0C05269g	CAGL0C05269g	5.1918	5.19094	6.51809	6.51744	6.24382	6.34779
CAGL0G07293g	CAGL0G07293g	5.6619	5.81878	7.22312	6.84535	6.69509	6.8877
CAGL0J06908g	CAGL0J06908g	5.03608	4.92393	6.54087	6.16344	6.16702	6.2301
CAGL0J00561g	CAGL0J00561g	8.5769	8.72477	9.93264	9.91839	9.76958	9.63901
CAGL0L06248g	CAGL0L06248g	5.52179	5.6454	6.94769	6.63851	6.70028	6.72398
CAGL0L06644g	CAGL0L06644g	5.27502	5.2725	6.69843	6.35093	6.37274	6.47615
CAGL0G06094g	CAGL0G06094g	5.42793	5.46574	6.79606	6.66835	6.50419	6.57549
CAGL0C04895g	CAGL0C04895g	4.92578	4.87299	6.27735	5.98641	6.04467	6.22378
CAGL0M08536g	CAGL0M08536g	3.43537	3.72898	4.82525	4.71887	4.56091	4.69577
CAGL0F04917g	CAGL0F04917g	2.88777	2.56452	4.24849	4.00818	3.96219	4.41665
CAGL0G03245g	CAGL0G03245g	7.8391	7.82206	9.02456	8.88813	9.0179	9.20214
CAGL0L05192g	CAGL0L05192g	3.86811	3.70182	5.67709	4.57459	5.90199	5.65067
CAGL0G01100g	CAGL0G01100g	5.84735	5.85324	7.08026	7.01106	6.92456	7.12775
CAGL0D04136g	CAGL0D04136g	4.8736	4.98861	5.98266	6.13707	5.97787	6.25232
CAGL0F01221g	CAGL0F01221g	4.13078	4.29522	5.41097	5.48262	5.22631	5.30549
CAGL0L02299g	CAGL0L02299g	6.48999	6.58971	7.87352	7.64362	7.57008	7.66658
CAGL0K08206g	CAGL0K08206g	4.74717	4.74286	6.12939	5.85515	5.76435	5.93808
CAGL0E01287g	CAGL0E01287g	8.00486	8.0781	9.21563	9.12593	9.17619	9.26495
CAGL0I06028g	CAGL0I06028g	4.81434	4.83044	6.18433	5.85963	5.84832	6.05462
CAGL0J06270g	CAGL0J06270g	4.46039	4.50409	5.77802	5.54511	5.5251	5.69985
CAGL0H01529g	CPR5	8.02583	8.06103	9.17101	9.11754	9.26142	9.22676
CAGL0H08558g	ATG11	3.99639	4.17823	5.04651	5.25926	5.05016	5.44876
CAGL0K08228g	CAGL0K08228g	4.65904	4.72399	5.74456	5.92395	5.7142	5.95449
CAGL0M13783g	CAGL0M13783g	5.81919	5.93066	7.14287	7.05285	6.87414	6.94393
CAGL0H10076g	CAGL0H10076g	10.1705	10.265	11.182	11.4374	11.4094	11.3644
CAGL0E03355g	CAGL0E03355g	5.59471	5.68549	6.96348	6.77852	6.7371	6.6058
CAGL0L05236g	MDH1	8.46698	8.66376	9.64715	9.53129	9.74321	9.73852
CAGL0B03069g	TAL1	9.21411	9.47502	10.286	10.6059	10.3202	10.4954
CAGL0H00979g	CAGL0H00979g	5.52911	5.4337	6.61371	6.72554	6.62275	6.81564
CAGL0J05302g	CAGL0J05302g	5.34503	5.29724	6.61403	6.44842	6.41989	6.5077
CAGL0K01199g	CAGL0K01199g	4.69296	4.79946	5.9375	5.89589	5.76534	5.83664
CAGL0H07007g	CAGL0H07007g	6.46948	6.59327	7.60482	7.73427	7.62786	7.59013
CAGL0L12474g	PHO85	3.90288	4.13677	5.03969	5.1439	5.07913	5.10196
CAGL0J01287g	AIP1	4.34028	4.45915	5.35398	5.52471	5.46997	5.63335
CAGL0I05852g	CAGL0I05852g	5.6808	5.77868	6.91638	6.77378	6.69119	6.93755
CAGL0F07535g	CAGL0F07535g	6.19268	6.42635	7.52107	7.52843	7.24507	7.2072
CAGL0I05808g	CAGL0I05808g	4.40992	4.33045	5.54466	5.50321	5.43833	5.72568
CAGL0K11209g	PEX5	4.32755	4.35196	5.36727	5.44651	5.48748	5.51878
CAGL0H02959g	TOS8	2.30498	2.33504	3.73644	2.96846	4.00978	4.34618
CAGL0B03597g	CAGL0B03597g	4.92207	5.04652	6.32922	6.06661	5.93582	5.9621
CAGL0C05247g	MET22	6.64883	6.64922	8.77381	8.74874	7.71272	7.46483
CAGL0A03366g	CAGL0A03366g	8.12883	8.20722	9.40788	9.22837	9.19706	9.22989
CAGL0K09702g	CAGL0K09702g	5.59935	5.72424	6.69998	6.62637	6.85415	6.76222
CAGL0H04939g	CAGL0H04939g	3.22309	3.07776	3.41963	5.16111	4.46601	4.78489
CAGL0L12716g	CAGL0L12716g	2.46185	2.56675	3.70106	3.52229	3.52217	3.59064
CAGL0K04939g	CAGL0K04939g	6.14265	6.17969	7.22581	7.24918	7.16025	7.34889
CAGL0K01749g	CAGL0K01749g	6.13901	6.38506	7.31446	7.34786	7.17728	7.31762
CAGL0J02926g	PET117	2.50774	2.47706	3.66732	3.69401	3.52335	3.52977
CAGL0L00759g	HIS1	7.16967	7.15876	8.78033	9.70258	8.25845	8.06374
CAGL0J03542g	CAGL0J03542g	3.89102	4.06755	5.1916	4.91661	4.92854	5.01378
CAGL0I07711g	CAGL0I07711g	3.40689	3.37888	4.60663	6.17503	4.05908	4.41894
CAGL0A04873g	CAGL0A04873g	-6.48944	-4.77087	-5.48876	-6.28184	-6.74344	-4.466
CAGL0M00154g	CYN1	6.46421	6.28442	8.5555	9.33767	6.64727	6.80255
CAGL0E03498g	CAGL0E03498g	1.37475	0.843843	2.5419	2.64297	2.50686	2.60009
CAGL0I09108g	CAGL0I09108g	4.27957	4.34937	5.83035	6.88055	5.18656	5.34377
CAGL0F00110g	CAGL0F00110g	-6.48944	-4.77087	-6.48876	-3.69688	-6.74344	-6.466
CAGL0K09988g	CAGL0K09988g	6.0417	6.04592	7.16004	7.06107	7.06412	7.09768
CAGL0L06358g	CAGL0L06358g	5.48891	5.53889	6.54225	6.53535	6.49452	6.61382
CAGL0C00231g	CAGL0C00231g	4.38401	5.79733	4.20124	7.5702	4.20857	4.32027
CAGL0I00396g	CAGL0I00396g	-0.845582	-0.912886	1.05813	0.672358	-0.300497	0.522689
CAGL0L10208g	CAGL0L10208g	4.77618	4.64962	5.7923	5.85451	5.79693	5.91717
CAGL0G07337g	CAGL0G07337g	5.37784	5.48475	6.47972	6.4225	6.40313	6.41397
CAGL0I04246g	CAGL0I04246g	7.04304	6.79542	8.18835	7.68476	8.99034	8.93958
CAGL0E04840g	CAGL0E04840g	0.876884	0.688565	2.85109	2.26506	1.60971	2.4882
CAGL0G06182g	CAGL0G06182g	5.15577	4.93433	6.62025	5.80131	7.01728	6.67292
CAGL0M12815g	CAGL0M12815g	-0.631457	-1.3446	1.41813	0.794978	-0.173585	1.03385
CAGL0K07700g	CAGL0K07700g	4.68236	4.72049	7.11706	5.88213	5.53385	5.86604
CAGL0M06435g	CAGL0M06435g	2.69544	4.23335	3.47846	5.38749	3.42774	3.87719
CAGL0A01221g	CAGL0A01221g	7.99053	8.05796	9.47506	8.89254	9.54506	9.81401
CAGL0L01265g	CAGL0L01265g	5.42008	5.44193	7.10556	6.17477	6.81856	6.97992
CAGL0F04521g	CAGL0F04521g	5.54157	5.57703	6.98164	6.40291	7.19191	7.17572
CAGL0M00242g	CAGL0M00242g	5.55973	7.2604	5.83739	8.0751	5.64511	5.64612
CAGL0L08470g	CAGL0L08470g	0.795964	0.894469	2.52526	2.24172	1.59195	2.23791
CAGL0L12320g	CAGL0L12320g	0.380926	0.568983	2.21514	2.43584	1.38584	1.37321
CAGL0H09504g	CAGL0H09504g	4.13901	4.03649	6.24489	5.53954	5.08945	5.38614
CAGL0C04741g	SOD1	6.78712	6.90663	8.70834	8.18232	8.23317	7.73137
CAGL0G05566g	CAGL0G05566g	7.44517	7.4656	8.89122	9.25677	8.20205	8.64477
CAGL0D02662g	CAGL0D02662g	1.16877	1.88734	2.91212	2.10618	2.70983	3.18146
CAGL0K08800g	ADI1	4.76145	4.596	6.59006	7.09007	4.91878	4.96341
CAGL0G05676g	CAGL0G05676g	5.42607	5.94638	6.80514	7.99944	6.369	6.56794
CAGL0I06644g	CAGL0I06644g	4.22051	4.15691	6.0955	4.64	3.88955	6.75816
CAGL0G04763g	CAGL0G04763g	4.22223	4.507	4.91372	6.16007	5.79669	5.26998
CAGL0M13365g	CAGL0M13365g	2.30822	2.32453	3.79548	3.52068	2.79766	3.67994
CAGL0D02640g	CAGL0D02640g	1.06515	1.93994	2.90998	2.01737	2.52569	3.13392
CAGL0F08173g	CAGL0F08173g	1.29846	1.43859	1.85109	2.63105	2.57397	2.85142
CAGL0D05566g	CAGL0D05566g	5.07566	5.16245	6.14446	5.75021	6.72327	6.58096
CAGL0K04499g	CAGL0K04499g	7.42055	7.43133	8.67099	8.17958	8.88557	8.9169
CAGL0D00374g	CAGL0D00374g	-2.58255	-2.60094	-1.27931	-1.5814	-2.28401	-1.18059
CAGL0H04015g	CAGL0H04015g	-2.03001	-0.912886	-0.318837	-0.015052	-1.21988	-1.33671
CAGL0L02607g	CAGL0L02607g	3.97511	4.09487	5.03774	5.73358	4.9094	5.54208
CAGL0K10736g	CYB2	4.9746	4.91738	6.12802	6.18704	5.59111	6.61565
CAGL0G09647g	CAGL0G09647g	-3.90448	-3.96351	-2.4013	-2.28184	-2.74344	-3.00656
CAGL0J10846g	CAGL0J10846g	7.47364	7.46283	9.61772	10.3466	8.22949	8.41081
CAGL0L03630g	GSH1	6.92022	6.97365	8.2566	8.82264	7.83882	7.96661
CAGL0L00429g	CAGL0L00429g	6.80948	6.69992	8.56694	8.06592	8.14454	7.73575
CAGL0M00308g	CAGL0M00308g	-0.030007	-0.448939	3.07539	2.11477	0.715991	0.753173
CAGL0H07645g	CAGL0H07645g	-0.030007	-0.62112	1.71091	1.45287	0.748413	1.41665
CAGL0A02211g	CAGL0A02211g	9.4777	9.37417	9.98553	10.7199	10.9048	10.7181
CAGL0I07381g	CAGL0I07381g	6.95389	6.96839	8.35766	7.87701	8.27732	8.45854
CAGL0H10450g	CAGL0H10450g	-1.40198	-1.27901	0.211677	-0.581398	-0.334049	0.148714
CAGL0L09691g	CAGL0L09691g	6.01016	6.20462	7.39646	7.62063	7.00904	7.4565
CAGL0I09504g	CAGL0I09504g	5.84818	5.84614	7.56006	6.67726	6.99032	7.04403
CAGL0G08954g	CAGL0G08954g	5.52354	6.66454	5.32662	7.86242	5.5751	5.50914
CAGL0I02794g	CAGL0I02794g	4.36153	4.27694	5.95755	5.61978	5.1702	5.59335
CAGL0K04873g	CAGL0K04873g	4.45674	4.45675	5.83176	5.39412	5.73937	5.92739
CAGL0B00110g	CAGL0B00110g	-3.48944	-5.77087	-1.84491	-1.42386	-3.57352	-1.65864
CAGL0H01375g	SUR2	7.24876	7.3284	8.64044	8.12516	8.6159	8.59162
CAGL0L10912g	CAGL0L10912g	6.71498	6.58173	7.82851	6.89869	7.74816	8.01801
CAGL0J02530g	CAGL0J02530g	4.40841	4.67363	5.21124	5.92548	5.64026	5.85734
CAGL0F09185g	CAGL0F09185g	5.37513	5.3458	6.8766	6.83937	6.32383	6.51664
CAGL0F06699g	CAGL0F06699g	1.29192	1.04291	2.87318	2.77615	2.10205	2.39819
CAGL0B04213g	CAGL0B04213g	1.71513	2.22349	3.22032	3.19187	2.69535	3.32517
CAGL0L13222g	CAGL0L13222g	5.96486	6.04632	6.69472	7.16537	7.3475	7.28774
CAGL0M06765g	CAGL0M06765g	5.22567	5.03528	6.37426	6.07379	6.69262	6.73842
CAGL0A02024g	CAGL0A02024g	5.35016	5.34222	6.8326	6.7008	6.25779	6.5186
CAGL0J03960g	CAGL0J03960g	5.578	5.49826	6.80039	6.39125	6.9767	6.91365
CAGL0J04906g	CAGL0J04906g	4.24865	4.1532	5.59505	5.56051	5.12577	5.6261
CAGL0M00330g	HOM6	9.428	9.3535	12.3238	11.3092	10.1215	10.3827
CAGL0M04851g	CAGL0M04851g	-6.48944	-3.96351	-5.48876	-6.28184	-6.74344	-6.466
CAGL0M10549g	CAGL0M10549g	7.16754	7.29573	8.02835	8.32999	8.456	8.73712
CAGL0I03872g	CAGL0I03872g	4.39244	4.59381	5.61845	4.66287	5.52393	5.5326
CAGL0K07205g	CAGL0K07205g	5.05986	4.62413	6.3024	7.19073	5.98979	6.07486
CAGL0H03047g	CAGL0H03047g	3.34345	3.16871	4.99102	4.52793	4.23169	4.59402
CAGL0M12056g	CAGL0M12056g	0.080417	-0.070427	1.63536	1.24172	0.921896	1.36689
CAGL0A01694g	CAGL0A01694g	4.8807	4.6901	6.55989	6.09048	5.67836	5.98676
CAGL0H03795g	LEU2	6.36212	6.40172	7.78525	7.7484	7.56604	7.33521
CAGL0J04026g	CAGL0J04026g	5.30782	5.32552	6.75039	6.4463	6.12171	6.54977
CAGL0I09746g	CAGL0I09746g	3.85708	4.03407	4.84439	4.9655	5.50834	5.25254
CAGL0M09779g	CTS1	8.6046	8.70043	9.06376	9.71285	9.89062	9.74043
CAGL0C03267g	FPS1	7.34177	7.31543	8.5772	8.23718	8.62779	8.7145
CAGL0J06424g	CAGL0J06424g	6.2746	6.35503	7.51	6.81471	7.48921	7.40716
CAGL0L10802g	CAGL0L10802g	0.608594	0.728979	1.80126	1.84745	1.1873	1.83779
CAGL0J00715g	CAGL0J00715g	2.38093	1.98068	3.40454	2.47971	3.54312	3.61482
CAGL0J01595g	GLM6	8.43496	8.48685	9.59586	9.38671	9.82342	9.80873
CAGL0K08844g	CAGL0K08844g	6.66933	6.75465	7.89717	7.94231	7.56319	8.03578
CAGL0C03916g	CAGL0C03916g	2.99639	3.06676	4.67991	4.13601	3.94656	4.06831
CAGL0L12914g	CAGL0L12914g	7.29008	7.50337	8.56491	8.89285	8.14121	8.35134
CAGL0D03256g	CAGL0D03256g	6.23337	6.28034	7.84131	7.08544	7.30853	7.31147
CAGL0M12837g	CAGL0M12837g	9.44146	9.29948	11.0449	11.2087	9.72029	9.5342
CAGL0C02981g	CAGL0C02981g	5.51794	5.507	6.10276	6.5231	6.62397	6.85678
CAGL0D01298g	TKL1	9.3189	9.19764	10.396	9.98689	10.486	10.7179
CAGL0D05654g	CAGL0D05654g	-0.788999	-0.888224	0.533605	0.272751	-0.300497	0.261925
CAGL0K12716g	CAGL0K12716g	0.554956	0.843843	1.69611	1.85259	1.05098	1.73858
CAGL0B02755g	CAGL0B02755g	5.58571	5.63241	6.79953	6.42789	6.81522	6.86422
CAGL0D01474g	CAGL0D01474g	3.8736	3.92	5.14514	4.83321	4.98873	5.32517
CAGL0E03025g	CAGL0E03025g	8.36757	8.30403	9.45584	8.66767	9.40825	9.42557
CAGL0H03619g	CAGL0H03619g	4.98477	4.82765	6.32422	5.83028	6.13231	6.32354
CAGL0L03696g	CAGL0L03696g	3.1759	2.99566	4.25186	4.24466	3.9768	4.8246
CAGL0H04719g	CAGL0H04719g	3.36075	3.50409	4.79201	4.54233	4.34336	4.65813
CAGL0J11770g	CAGL0J11770g	9.20408	9.26518	10.1891	10.5278	10.325	10.5756
CAGL0K01155g	CAGL0K01155g	2.48498	2.56229	2.9768	3.42379	4.58299	4.63598
CAGL0C04004g	CAGL0C04004g	3.55222	3.51222	4.64245	4.89869	4.49854	4.83664
CAGL0E04642g	CAGL0E04642g	6.31328	6.31626	7.5263	7.05857	7.38954	7.50042
CAGL0I05962g	CAGL0I05962g	6.32033	6.32206	7.6965	7.50841	7.28455	7.42617
CAGL0L09933g	CAGL0L09933g	5.85208	5.94424	7.13843	7.17708	6.8188	6.99702
CAGL0E03201g	CAGL0E03201g	9.78598	9.88135	11.3939	10.9098	10.7404	10.8011
CAGL0I00330g	CAGL0I00330g	6.05697	6.07384	7.41493	6.86839	7.20091	7.08005
CAGL0H03289g	CAGL0H03289g	5.39359	5.3658	6.77216	6.51603	6.24524	6.4677
CAGL0L10494g	CAGL0L10494g	6.66696	6.65605	8.09602	7.65296	7.71529	7.86681
CAGL0G01408g	CAGL0G01408g	1.98629	2.20927	2.96862	3.16111	3.28585	3.38106
CAGL0L10604g	CAGL0L10604g	4.72306	4.82019	6.07872	5.97526	5.66728	5.81478
CAGL0K04785g	CAGL0K04785g	2.84372	2.69061	4.32101	4.07351	3.75441	3.8548
CAGL0J03740g	CAGL0J03740g	1.15442	1.0995	2.23916	2.22991	1.79572	2.34458
CAGL0I11011g	CAGL0I11011g	-6.48944	-6.77087	-4.48876	-5.28184	-6.74344	-6.466
CAGL0M11682g	CAGL0M11682g	4.46112	4.46155	5.85637	5.53555	5.33037	5.50591
CAGL0E01243g	CAGL0E01243g	4.87415	4.68549	5.75203	5.9723	6.2855	6.07462
CAGL0E03157g	CYS4	8.87435	8.93884	10.5544	10.188	9.03602	9.00948
CAGL0M02981g	CAGL0M02981g	5.13673	5.1349	6.42375	6.3197	6.09143	6.24028
CAGL0E05456g	CAGL0E05456g	3.45161	3.28712	2.57193	3.57303	5.20091	5.47689
CAGL0M01936g	CAGL0M01936g	6.16967	6.18224	7.42656	7.22744	6.92367	7.2301
CAGL0I00110g	CAGL0I00110g	0.532929	1.03003	1.85109	1.85771	1.45623	1.91771
CAGL0C04367g	CAGL0C04367g	6.36231	6.2969	7.69138	7.34877	7.61748	7.40995
CAGL0C01243g	CAGL0C01243g	7.09588	7.00114	8.55755	9.35062	7.57517	7.6624
CAGL0L06798g	CAGL0L06798g	7.9666	7.97717	8.93557	9.06006	9.11912	9.27107
CAGL0F07579g	CAGL0F07579g	7.6541	8.36083	8.75742	9.70026	8.7713	8.65193
CAGL0G07425g	CAGL0G07425g	6.9646	6.92	8.23292	8.17387	7.9265	8.05143
CAGL0L09537g	CAGL0L09537g	0.343452	0.273527	1.71091	1.34752	1.38068	1.12646
CAGL0H00781g	CAGL0H00781g	5.88696	5.8831	7.25964	6.99574	6.87	6.94803
CAGL0A01892g	CAGL0A01892g	-2.40198	-1.91289	-1.20336	-1.07238	-1.15848	-1.65864
CAGL0J10538g	CAGL0J10538g	4.07757	4.11254	5.22032	5.26698	4.9544	5.19489
CAGL0D02794g	CAGL0D02794g	5.80834	6.06952	6.86714	7.15357	6.7048	7.09732
CAGL0J05082g	CAGL0J05082g	4.84036	4.8042	6.10999	5.9782	5.75216	5.90605
CAGL0F01749g	CAGL0F01749g	7.60464	7.52655	9.64973	10.0943	8.58978	8.5516
CAGL0L08712g	CAGL0L08712g	5.3474	5.22419	6.3791	5.96728	6.47709	6.44652
CAGL0M00616g	CAGL0M00616g	5.63339	5.50787	6.8093	6.66708	6.47905	6.90891
CAGL0L11880g	CAGL0L11880g	5.75433	5.79185	7.02188	6.93945	6.68518	6.76598
CAGL0I05236g	BCY1	7.10395	7.12603	8.32397	8.25841	8.03787	8.16524
CAGL0J02002g	CAGL0J02002g	5.65458	5.62467	6.75069	6.81009	6.61631	6.8631
CAGL0J04158g	RCN2	7.21111	7.24429	8.28453	8.11068	8.35241	8.38219
CAGL0B03685g	CAGL0B03685g	9.36939	9.4608	10.4853	10.6257	10.3004	10.4692
CAGL0A04697g	CAGL0A04697g	6.20796	6.26256	7.35565	7.14574	7.35402	7.34979
CAGL0D02266g	CAGL0D02266g	5.1499	5.1866	6.13626	6.25514	6.18637	6.4688
CAGL0I00682g	CAGL0I00682g	4.51969	4.49358	5.75649	5.48841	5.52305	5.70924
CAGL0L10384g	CAGL0L10384g	3.80403	3.602	4.84495	5.03783	4.49496	4.84121
CAGL0L06820g	CAGL0L06820g	6.21641	6.14146	7.23756	7.32965	7.03782	7.37694
CAGL0L03498g	CAGL0L03498g	6.09317	6.10373	7.21059	7.06412	7.17682	7.2684
CAGL0I07821g	CAGL0I07821g	5.77588	5.96659	6.77744	6.9235	6.57806	7.00708
CAGL0J07282g	CAGL0J07282g	2.32755	2.52834	3.57193	3.43069	3.14073	3.36373
CAGL0I09394g	CAGL0I09394g	5.31792	5.27045	6.42076	6.13654	6.35936	6.40822
CAGL0H00682g	CAGL0H00682g	6.23038	6.16871	7.49966	7.29854	7.20474	7.28691
CAGL0J07304g	CAGL0J07304g	4.08326	4.11864	5.18366	5.15018	4.95873	5.18011
CAGL0F08217g	CAGL0F08217g	0.72973	0.542016	3.53914	1.67816	1.1932	1.85142
CAGL0J01958g	CAGL0J01958g	5.38516	5.32618	6.40416	6.45604	6.23884	6.52818
CAGL0K03663g	CAGL0K03663g	9.54289	9.70825	10.7608	10.3806	10.5447	10.6413
CAGL0G03619g	CAGL0G03619g	4.83249	4.91913	6.03284	5.8837	5.81259	5.94233
CAGL0J08415g	SAM2	8.78129	8.71704	10.7829	10.2833	9.3588	9.35491
CAGL0G01540g	NCE103	4.87907	5.07541	6.01332	5.87393	6.10107	5.99472
CAGL0I10747g	CAGL0I10747g	6.89413	6.96448	7.47648	6.8763	8.46731	8.26554
CAGL0M04147g	CAGL0M04147g	5.11187	5.3016	6.30565	6.02792	6.16345	6.22444
CAGL0H03113g	CAGL0H03113g	3.80977	3.58558	4.92169	4.85451	4.77521	5.08859
CAGL0A00649g	CAGL0A00649g	-1.36016	-1.60094	-0.221976	-0.215749	-0.476654	-0.29607
CAGL0L06138g	CAGL0L06138g	7.4848	8.03553	8.82043	9.463	7.83239	7.69553
CAGL0J09130g	CAGL0J09130g	5.75046	5.68703	6.75337	6.79615	6.68923	6.89923
CAGL0H09174g	PEX1	3.2554	3.4483	4.1415	4.28802	4.35525	4.38184
CAGL0L12518g	CAGL0L12518g	-0.204036	-0.295134	1.96245	1.20198	0.322649	0.578399
CAGL0I02200g	SOL3	7.48865	7.43202	8.51396	8.42951	8.51266	8.57001
CAGL0K03355g	CAGL0K03355g	-2.31951	-1.86398	-2.02933	-0.448948	-1.88546	-0.942434
CAGL0G01947g	CAGL0G01947g	5.22567	4.92784	6.9049	7.27443	5.72264	6.09815
CAGL0F01793g	ERG3	7.42102	7.48571	7.9805	8.10018	8.93568	9.2329
CAGL0K06127g	CAGL0K06127g	-1.53524	-2.07043	0.019032	-0.553918	-1.57352	0.302189
CAGL0G04961g	CAGL0G04961g	5.99312	5.94445	7.93973	6.99516	6.46662	6.6011
CAGL0H00759g	CAGL0H00759g	1.06515	0.836463	2.66606	2.63105	1.32265	1.9434
CAGL0B00242g	CAGL0B00242g	-6.48944	-5.77087	-6.48876	-3.69688	-6.74344	-6.466
CAGL0E04026g	CAGL0E04026g	5.20274	5.07658	6.45705	6.20625	5.30811	5.52304
CAGL0D06732g	EPA21	-6.48944	-6.77087	-6.48876	-5.28184	-6.74344	-5.466
CAGL0D05434g	CAGL0D05434g	5.95816	6.37331	6.14446	5.91507	7.13729	7.10659
CAGL0M13739g	CAGL0M13739g	6.63258	6.60417	8.31123	7.69204	7.14559	7.18595
CAGL0K04477g	CAGL0K04477g	8.55696	8.66415	9.02777	9.02034	9.88857	9.90503
CAGL0H02497g	CAGL0H02497g	5.27585	5.21746	6.58018	6.96624	5.77939	6.09529
CAGL0K00341g	CAGL0K00341g	4.53432	4.51858	6.34155	6.01851	5.34369	5.39082
CAGL0B03289g	CAGL0B03289g	5.62235	5.66011	6.7295	7.02294	6.16795	5.9942
CAGL0D00154g	AQY1	2.52179	2.2817	3.57867	4.09429	3.30368	2.58113
CAGL0F05951g	CAGL0F05951g	3.29192	3.38648	4.61321	5.12755	4.08231	4.07993
CAGL0M00352g	CAGL0M00352g	4.3001	4.27694	5.70968	5.40685	5.04732	4.57908
CAGL0L12496g	CAGL0L12496g	-0.339691	-0.726473	1.4301	1.11048	0.344022	0.354183
CAGL0D00264g	NUD1	2.11047	2.18623	1.99102	3.59007	3.24098	3.09243
CAGL0K11616g	CAGL0K11616g	5.97102	5.85712	7.32311	7.86354	6.95537	6.69056
CAGL0G04741g	CAGL0G04741g	4.58403	4.68086	5.87263	6.6816	5.57567	5.45659
CAGL0G05764g	CAGL0G05764g	7.22083	7.0397	7.45448	7.00732	8.22392	8.24777
CAGL0K12100g	CAGL0K12100g	6.66126	6.73532	7.30839	7.11931	7.87855	7.93768
CAGL0K04675g	CAGL0K04675g	-1.48944	-1.77087	0.0962	-1.23744	-0.721073	-0.488716
CAGL0I08525g	CAGL0I08525g	4.5433	4.67466	5.54707	5.78828	4.9883	4.93168
CAGL0L04664g	HEM15	6.16989	6.14669	6.54981	6.71022	7.31852	7.24761
CAGL0G03047g	CAGL0G03047g	3.46766	3.61068	4.77685	4.62806	3.75042	4.23964
CAGL0I07689g	CAGL0I07689g	6.51776	6.44981	6.3465	8.31773	6.71163	6.61366
CAGL0F03641g	CAGL0F03641g	5.00091	4.9613	4.96605	6.69687	5.05786	4.69261
CAGL0H10010g	CAGL0H10010g	-0.339691	-0.344602	1.24595	0.917834	0.494964	0.416648
CAGL0I10147g	PWP1	4.18122	4.26324	5.51511	5.37235	4.87127	4.72815
CAGL0E03267g	CAGL0E03267g	4.95454	5.05051	6.01755	6.49809	5.63485	5.60077
CAGL0L09361g	CAGL0L09361g	-1.789	-1.81667	-0.339015	-0.423857	-0.860797	-1.10844
CAGL0J02706g	CAGL0J02706g	-0.558701	-0.542048	0.833166	0.161105	0.187297	0.703929
CAGL0J00110g	CAGL0J00110g	-1.90448	-1.24731	-0.733875	-2.11191	-1.57352	-0.765556
CAGL0E05192g	CAGL0E05192g	4.5847	4.54993	6.11764	5.35207	5.50003	5.88135
CAGL0L10362g	CAGL0L10362g	7.32605	7.0109	8.30408	8.20832	8.84046	9.09714
CAGL0F03267g	CAGL0F03267g	5.18872	5.35325	6.56838	6.46215	5.79766	6.00593
CAGL0J10868g	CAGL0J10868g	1.94519	1.79899	3.06391	3.53834	2.50449	2.90687
CAGL0E05214g	CAGL0E05214g	4.74058	4.71396	6.27029	5.51298	5.69119	5.99318
CAGL0G10219g	CAGL0G10219g	-1.68208	-0.912886	-0.681408	0.04009	-1.49551	-0.942434
CAGL0K12474g	CAGL0K12474g	6.33313	6.27267	7.7016	7.34923	6.96747	7.02398
CAGL0D04752g	CAGL0D04752g	6.07018	6.09699	6.79012	7.03147	7.39283	7.45315
CAGL0J10318g	CAGL0J10318g	5.31872	5.45223	5.71947	6.05355	6.51542	6.3879
CAGL0I01298g	CAGL0I01298g	7.1187	7.07227	8.32817	8.41464	7.85036	7.90986
CAGL0F03003g	CAGL0F03003g	5.2775	5.22242	5.93776	6.03359	6.49227	6.43939
CAGL0J11242g	CAGL0J11242g	4.6392	5.1654	5.32982	5.9998	5.64646	4.89978
CAGL0I06809g	CAGL0I06809g	3.79481	3.7079	5.22634	4.50606	4.89906	4.65748
CAGL0L13354g	TNR1	1.74897	1.89447	2.43902	3.98026	1.9112	2.11143
CAGL0L00157g	CAGL0L00157g	-5.48944	-4.1859	-5.48876	-3.69688	-6.74344	-6.466
CAGL0E02871g	CAGL0E02871g	4.06707	4.3597	5.76005	4.99545	4.94481	5.3341
CAGL0G05093g	CAGL0G05093g	4.40462	4.48652	5.46725	6.16783	5.33037	5.36254
CAGL0I06182g	PIR2	9.19037	9.2337	9.76573	10.17	10.5834	10.2553
CAGL0K07634g	CAGL0K07634g	1.1759	1.03649	2.24595	2.43584	1.52802	2.17063
CAGL0H06171g	CAGL0H06171g	5.40916	5.48505	6.1883	6.12384	6.58804	6.62064
CAGL0G00110g	CAGL0G00110g	-6.48944	-6.77087	-6.48876	-6.28184	-5.15848	-6.466
CAGL0I07359g	INO4	4.13261	4.09177	5.31335	5.14914	4.73634	4.88494
CAGL0A03102g	ARO10	4.08516	4.36932	4.51616	5.12702	4.90087	5.37321
CAGL0L10692g	CAGL0L10692g	2.66031	2.81222	3.17123	3.71675	3.46479	3.8548
CAGL0D03410g	CAGL0D03410g	4.10768	4.2057	5.50912	4.90799	4.94131	5.21612
CAGL0L13046g	CAGL0L13046g	5.07662	4.90377	6.40643	6.27682	5.75092	5.99241
CAGL0A01193g	CAGL0A01193g	2.5357	2.77603	3.06583	3.19996	3.56604	3.70518
CAGL0I10516g	CAGL0I10516g	6.75076	6.81902	7.79157	7.92296	7.30641	7.58793
CAGL0L12298g	CAGL0L12298g	4.48426	4.59217	5.52596	5.76563	5.08112	5.36016
CAGL0M04103g	CAGL0M04103g	4.89804	4.98026	6.21817	5.01508	4.73987	5.12178
CAGL0J00583g	CAGL0J00583g	7.76662	7.74637	9.20638	9.00454	8.70693	8.75597
CAGL0K01903g	CAGL0K01903g	1.43537	1.64699	2.83767	2.29181	2.77029	2.38887
CAGL0K03465g	CAGL0K03465g	7.3159	7.40562	7.23671	8.3983	7.34915	7.48383
CAGL0K08162g	CAGL0K08162g	6.69187	6.84154	7.77282	7.81578	7.2424	7.49065
CAGL0K07502g	CAGL0K07502g	-3.48944	-3.60094	-2.68141	-1.15255	-3.74344	-3.00656
CAGL0H05247g	CAGL0H05247g	4.33552	4.19564	5.5529	5.25974	5.15931	5.65716
CAGL0A01782g	CAGL0A01782g	11.3032	11.1882	12.1034	11.9918	12.3522	12.4989
CAGL0M12771g	CAGL0M12771g	3.15261	3.13903	4.46834	4.14023	3.92898	4.25082
CAGL0F06919g	CAGL0F06919g	5.78669	5.8155	7.07396	6.60862	6.8037	6.60513
CAGL0G08019g	CAGL0G08019g	4.52807	4.5226	5.44161	5.9905	5.5872	5.4969
CAGL0C00451g	CAGL0C00451g	6.46984	6.52375	7.86369	7.3003	7.48718	7.37822
CAGL0C00253g	CAGL0C00253g	0.265449	0.672076	1.49992	1.14443	0.648877	1.31536
CAGL0L02761g	CAGL0L02761g	4.24527	4.20784	5.11718	5.3575	4.93384	5.34377
CAGL0E02981g	CAGL0E02981g	6.53119	6.56159	7.79273	7.3263	7.37939	7.54959
CAGL0F01969g	CAGL0F01969g	4.90877	4.96172	5.69239	5.86441	6.12538	6.07945
CAGL0M06105g	CAGL0M06105g	5.44388	5.58778	6.44751	6.9937	6.39467	6.3092
CAGL0I09812g	CAGL0I09812g	8.13747	8.19888	9.39228	8.86469	9.05993	9.18618
CAGL0L08602g	CAGL0L08602g	6.55034	6.47483	7.62351	7.35365	7.39187	7.78866
CAGL0B03531g	CAGL0B03531g	2.59271	2.55106	3.72677	3.66799	3.34004	3.43034
CAGL0I10725g	CAGL0I10725g	5.83193	5.80939	6.7907	6.67581	7.05331	7.01845
CAGL0J09372g	CAGL0J09372g	6.6217	6.73408	7.91977	7.32283	7.62881	7.53568
CAGL0H09636g	CAGL0H09636g	5.22952	5.16577	6.13375	6.11931	6.38809	6.4978
CAGL0E06248g	RCN1	4.12066	4.25011	4.70168	5.01794	5.14454	5.27294
CAGL0F03113g	CAGL0F03113g	3.8921	3.87839	4.72252	5.05244	4.70777	4.95133
CAGL0E02035g	CAGL0E02035g	6.78027	6.72761	7.08536	7.9371	6.83009	6.97098
CAGL0J05962g	CAGL0J05962g	4.8736	4.79471	5.99505	5.52713	5.90019	5.74711
CAGL0I00858g	CAGL0I00858g	4.44794	4.44588	5.48923	5.09916	5.30437	5.45807
CAGL0I07117g	CAGL0I07117g	5.41407	6.19816	5.01158	7.50596	5.25656	5.20466
CAGL0D03938g	CAGL0D03938g	4.88777	4.78612	5.87428	6.05216	5.79111	6.24932
CAGL0F05049g	CAGL0F05049g	3.56041	3.389	4.65526	4.17862	4.34336	4.56674
CAGL0A03300g	CAGL0A03300g	-1.90448	-2.37855	-0.760842	-0.553918	-0.936086	-1.37853
CAGL0E06402g	CAGL0E06402g	0.125271	0.595455	1.4301	0.241724	0.024744	0.009738
CAGL0M05533g	CAGL0M05533g	6.10255	6.16669	6.28911	6.0125	7.28567	6.45082
CAGL0B02079g	CAGL0B02079g	-3.03001	-2.60094	-2.02933	-2.47448	-1.93609	-3.65864
CAGL0I09086g	CAGL0I09086g	4.0728	4.06912	5.22548	5.08394	4.76633	5.05806
CAGL0C02321g	PHM8	8.84724	8.87161	9.80262	9.78975	9.97575	10.1055
CAGL0I02948g	CAGL0I02948g	3.72852	3.78372	4.53845	4.51501	4.77472	4.79786
CAGL0C05093g	CAGL0C05093g	7.09611	6.97596	8.28736	7.77565	8.12688	8.06325
CAGL0K12760g	CAGL0K12760g	5.25034	5.13677	6.53343	6.19996	6.18526	6.42008
CAGL0M14025g	CAGL0M14025g	8.40216	8.32065	9.56574	9.22599	9.54407	9.35386
CAGL0A03344g	CAGL0A03344g	6.49195	6.39137	7.67528	7.40269	7.32097	7.59166
CAGL0K07876g	CAGL0K07876g	4.86095	4.86621	5.8278	5.90706	5.62888	5.996
CAGL0M12925g	CAGL0M12925g	5.47959	5.43064	6.34689	6.22991	6.49511	6.56915
CAGL0H05181g	CAGL0H05181g	3.35448	3.49592	4.3977	4.10079	4.09261	4.37242
CAGL0L11616g	CAGL0L11616g	4.59935	4.51454	5.32502	5.60995	5.54023	5.77092
CAGL0D05318g	CAGL0D05318g	4.62756	4.44649	5.81473	5.78189	5.3768	5.61249
CAGL0K03201g	CAGL0K03201g	1.83249	1.94338	3.0962	2.80031	2.6553	2.88715
CAGL0B00902g	HIS4	6.49836	6.48976	7.33997	9.31784	7.325	7.22651
CAGL0H00737g	CAGL0H00737g	5.09834	5.1506	6.14014	6.14049	5.77693	6.03858
CAGL0F08019g	PEX21	4.13627	4.53006	3.91105	6.26554	4.6891	4.69954
CAGL0G05329g	CAGL0G05329g	0.018356	0.37888	1.50559	1.24954	1.01811	0.985216
CAGL0K02585g	YAP3	4.42644	4.28983	5.43196	5.29086	5.13039	5.51664
CAGL0K10340g	ADE2	6.45984	6.42604	7.72525	7.41839	7.44407	7.55003
CAGL0I07623g	CAGL0I07623g	5.31469	5.21711	6.81758	5.92151	5.43522	5.61682
CAGL0E04620g	PST1	7.5494	7.71622	8.43693	8.31272	8.65957	8.61228
CAGL0D06154g	CAGL0D06154g	4.70593	4.72748	5.71336	5.45202	5.61081	5.71795
CAGL0K07744g	CAGL0K07744g	6.38535	6.30545	7.38804	7.52813	7.22325	7.26797
CAGL0D00110g	CAGL0D00110g	-6.48944	-6.77087	-4.9038	-6.28184	-5.74344	-6.466
CAGL0A02574g	CAGL0A02574g	6.04292	6.16467	6.39464	7.10375	6.17877	6.17154
CAGL0M12364g	CAGL0M12364g	-1.24151	-1.04295	0.211677	-0.696876	-0.860797	-1.25654
CAGL0M07183g	CAGL0M07183g	3.11047	3.31527	4.02989	4.25344	3.96046	4.23877
CAGL0L01837g	VPS24	4.58336	4.65749	5.73252	5.50402	5.51748	5.65359
CAGL0H07887g	CAGL0H07887g	6.83938	6.84304	7.77905	7.65756	7.85874	7.86506
CAGL0F06017g	LYS7	6.24061	6.22508	7.40122	7.23251	7.12374	7.25029
CAGL0G03993g	CAGL0G03993g	-2.90448	-2.1859	-1.9038	-1.75828	-2.09958	-2.5591
CAGL0A02882g	CAGL0A02882g	6.94519	6.82846	8.23004	7.91022	7.92034	7.99004
CAGL0D03102g	CAGL0D03102g	4.11419	4.08711	5.03038	5.11691	4.93648	5.14917
CAGL0K07359g	CAGL0K07359g	-0.904476	-0.231708	0.945866	-0.553918	-0.593693	-0.658641
CAGL0C01595g	CAGL0C01595g	7.02219	6.95758	7.94489	8.62604	7.19999	7.19489
CAGL0J02948g	FCY2	6.21338	6.21177	6.6373	6.12277	7.8813	7.1022
CAGL0G02365g	CAGL0G02365g	4.68424	4.59546	5.79056	5.62393	5.51365	5.69261
CAGL0C01859g	CAGL0C01859g	-2.58255	-2.77087	-1.4013	-1.69688	-1.61416	-1.466
CAGL0F00825g	CAGL0F00825g	6.67923	6.52777	8.2302	7.54004	6.76893	6.87552
CAGL0L12100g	CAGL0L12100g	-3.90448	-3.31144	-2.4013	-2.95991	-5.15848	-2.37853
CAGL0H00110g	CAGL0H00110g	-6.48944	-6.77087	-5.48876	-6.28184	-6.74344	-6.466
CAGL0L02937g	HIS3	-6.48944	-6.77087	-5.48876	-6.28184	-6.74344	-6.466
CAGL0C04092g	TRP1	4.43537	4.48888	5.56006	5.33655	5.40345	5.451
CAGL0A00517g	CAGL0A00517g	5.99337	6.23949	7.30839	7.06287	6.97156	6.94697
CAGL0B00726g	CAGL0B00726g	0.868114	0.62145	1.90784	0.837103	1.2281	1.07316
CAGL0C01815g	CAGL0C01815g	5.39969	5.48682	6.32362	6.42466	6.26866	6.43374
CAGL0L10406g	CYT1	6.89467	7.14417	7.60366	7.84261	7.96435	7.90633
CAGL0M01452g	CAGL0M01452g	2.30172	2.58888	3.18189	2.97791	3.31184	3.30219
CAGL0E05918g	CAGL0E05918g	4.79481	4.76441	5.81245	5.70365	5.75366	5.83063
CAGL0A04345g	CAGL0A04345g	6.02528	6.08711	7.06247	7.06204	6.95581	6.96014
CAGL0C05005g	CAGL0C05005g	3.69171	3.88198	4.7103	4.00009	3.84058	3.91663
CAGL0K09790g	CAGL0K09790g	7.21954	7.28831	8.28937	8.14816	8.17024	8.24088
CAGL0I09306g	CAGL0I09306g	2.92419	3.05727	3.88628	3.93854	3.78208	4.00466
CAGL0D01518g	CAGL0D01518g	1.97409	2.27079	3.07539	2.82145	2.83399	3.01378
CAGL0J02332g	CAGL0J02332g	5.25287	5.31095	6.30118	6.18118	6.20839	6.27842
CAGL0J07876g	CAGL0J07876g	3.32274	3.44224	3.40454	3.98026	3.39994	4.38731
CAGL0J00847g	CAGL0J00847g	7.16217	7.49182	7.84872	8.18188	8.15081	8.27157
CAGL0E01639g	CAGL0E01639g	6.57749	6.59614	7.66233	7.56267	7.59348	7.56476
CAGL0G06468g	CAGL0G06468g	6.0395	6.44603	6.46452	7.21502	6.27493	6.03882
CAGL0M07359g	CAGL0M07359g	0.986295	0.776027	2.53638	1.68395	1.1873	1.32191
CAGL0G08107g	CAGL0G08107g	-1.13189	-0.863976	0.292597	-0.889521	-0.962081	-0.488716
CAGL0K13002g	AED2	5.61941	5.79709	6.62303	5.87425	5.66728	6.0809
CAGL0K04257g	CAGL0K04257g	2.97204	2.82532	3.27611	2.93975	3.48658	4.02385
CAGL0M14113g	TNR2	-0.241511	-0.311435	0.533605	2.04908	0.446384	0.464742
CAGL0I05060g	CAGL0I05060g	6.67908	6.75649	6.87428	8.05292	6.22216	7.28356
CAGL0G05720g	CAGL0G05720g	2.54948	2.71295	3.96759	3.16111	2.81115	2.91771
CAGL0G06798g	CAGL0G06798g	2.42345	2.20355	2.77802	2.39059	3.53617	2.92847
CAGL0A01628g	MIG1	3.93263	4.24803	4.95832	4.85963	4.93648	4.73061
CAGL0D01694g	CAGL0D01694g	-1.20404	-2.44894	-1.53457	-0.111913	-0.458038	-0.006564
CAGL0M14069g	PWP6	4.32914	4.5203	5.53118	5.07956	4.55977	4.41359
CAGL0C03696g	CAGL0C03696g	3.80633	3.97144	4.35594	4.86346	3.85088	4.16336
CAGL0M10395g	CAGL0M10395g	2.4413	2.40655	3.72434	2.82407	2.76831	3.03982
CAGL0I04576g	CAGL0I04576g	3.65522	3.6648	4.72434	3.98612	4.12461	3.99241
CAGL0L06072g	CAGL0L06072g	-1.63146	-1.81667	-0.816337	-0.609413	-1.65598	-1.71111
CAGL0J01463g	CAGL0J01463g	5.49249	5.40873	6.7366	5.56913	6.34137	5.8246
CAGL0H06369g	CYS3	9.64727	9.61771	10.4088	10.8378	9.92876	9.88086
CAGL0F07865g	UPC2B	3.76204	3.76635	5.33381	4.42725	4.303	4.24825
CAGL0L06402g	YCF1	7.67437	7.71754	8.75296	8.21539	7.95157	8.01958
CAGL0A02508g	CAGL0A02508g	6.15937	6.19474	6.1883	6.15955	6.22252	6.14802
CAGL0H04257g	MT-II	6.81548	6.78708	7.85428	7.16912	6.85798	7.59183
CAGL0K00110g	AWP2	-4.48944	-3.96351	-2.9038	-4.28184	-5.15848	-4.14407
CAGL0G02453g	CAGL0G02453g	6.14945	6.27881	7.14344	8.41181	6.76633	6.83793
CAGL0E04224g	CAGL0E04224g	3.24865	3.50293	2.97884	3.16937	3.86481	4.28471
CAGL0F03487g	CAGL0F03487g	3.85152	3.92697	3.84886	3.84228	3.76831	3.86939
CAGL0J03762g	MET7	5.65967	5.4205	6.48565	7.00096	5.89545	5.90005
CAGL0G01210g	NIT3	6.88275	6.79209	8.02453	7.66635	7.10401	7.13334
CAGL0H01661g	CAGL0H01661g	0.464758	0.798989	2.63277	1.16937	0.811148	1.45882
CAGL0G06644g	CAGL0G06644g	-6.48944	-6.77087	-6.48876	-6.28184	-5.74344	-5.466
CAGL0H04961g	CAGL0H04961g	9.19117	9.21248	9.21938	9.14731	9.16975	9.08481
CAGL0A00209g	CAGL0A00209g	9.01665	9.03233	9.00165	8.94062	8.96992	8.92656
CAGL0C01529g	CAGL0C01529g	6.04024	6.03387	6.07085	5.8884	6.08589	6.05266
CAGL0J01375g	CAGL0J01375g	6.1874	6.17458	6.97502	7.22744	6.34502	6.52499
CAGL0H04279g	MT-IIB	6.9161	6.88511	7.99814	7.35013	6.99243	7.7157
CAGL0G02519g	CAGL0G02519g	4.67672	4.65749	4.83486	4.66799	4.6408	4.72198
CAGL0K10384g	CAGL0K10384g	4.03314	3.98235	4.01903	4.03557	3.99634	4.20996
CAGL0M11770g	CAGL0M11770g	5.64787	5.64382	5.68959	5.59045	5.66675	5.80867
CAGL0H07997g	KNH1	4.99589	5.00062	5.59936	4.73148	6.08132	5.49509
CAGL0H06391g	CAGL0H06391g	4.67986	4.65854	4.69239	4.67163	4.68125	4.92579
CAGL0A00319g	CAGL0A00319g	4.89912	4.87344	4.96554	4.79831	4.85042	4.94869
CAGL0G09823g	CAGL0G09823g	6.0577	6.02679	6.17968	6.03473	6.0371	6.15445
CAGL0E00429g	CAGL0E00429g	6.88655	6.87727	7.04481	6.79448	6.89137	6.92135
CAGL0J10516g	CAGL0J10516g	5.48927	5.52117	5.62205	5.48096	5.38423	5.51093
CAGL0H07953g	CAGL0H07953g	6.15464	6.14146	6.33221	6.08366	6.16495	6.18259
CAGL0D05192g	CAGL0D05192g	7.91251	7.90465	7.88281	7.79431	7.77552	7.92034
CAGL0J06314g	CAGL0J06314g	7.03216	6.98339	8.08121	7.68656	7.32416	7.3913
CAGL0F03905g	CAGL0F03905g	4.57665	4.58559	4.66732	4.57147	4.46906	4.67356
CAGL0M06699g	CAGL0M06699g	4.66094	4.55219	4.53222	4.6825	4.61026	4.66586
CAGL0M09669g	CAGL0M09669g	5.30538	5.26462	6.417	5.47805	5.9345	5.89046
CAGL0D06270g	CAGL0D06270g	4.578	4.64593	4.46179	4.55973	4.59975	4.48529
CAGL0M13827g	FKS3	4.60398	4.48946	5.77392	5.00818	4.99971	5.17921
CAGL0M08954g	CAGL0M08954g	5.38401	5.45253	5.40568	5.38749	5.42774	5.56674
CAGL0M04433g	CNH1	6.8112	6.8397	6.94051	6.71393	6.82023	6.86814
CAGL0K00407g	CAGL0K00407g	7.66767	7.66304	7.85574	7.58949	7.66853	7.61274
CAGL0D04422g	CAGL0D04422g	6.67075	6.5871	6.80298	6.60348	6.64296	6.68977
CAGL0H05775g	CAGL0H05775g	4.95661	4.96384	4.90087	4.95537	4.93912	5.20643
CAGL0F07359g	CAGL0F07359g	6.72458	6.64461	7.05112	7.99915	7.40361	7.24578
CAGL0L13266g	CAGL0L13266g	4.7133	4.69061	4.88628	4.62655	4.70261	4.67356
CAGL0D01452g	CAGL0D01452g	8.34612	8.25544	8.45554	8.27077	8.33304	8.3011
CAGL0G00220g	CAGL0G00220g	9.66199	9.64671	9.69621	9.6749	9.58132	9.86017
CAGL0K05093g	CAGL0K05093g	7.57648	7.63607	7.60705	7.54927	7.71034	7.67124
CAGL0F02387g	PHO87	8.06575	8.10915	8.19949	8.05627	8.18114	8.1099
CAGL0I08415g	CAGL0I08415g	4.94727	4.92654	5.15464	4.98962	4.93824	5.01429
CAGL0M12342g	CAGL0M12342g	5.77412	5.74877	5.68085	5.5893	5.81019	5.76673
CAGL0A04389g	CAGL0A04389g	4.72852	4.72299	4.66606	4.77073	4.69639	4.93328
CAGL0E01567g	RBX1	5.60794	5.64355	5.73524	5.6807	5.56461	5.68025
CAGL0L09955g	CAGL0L09955g	6.74837	6.71181	6.89332	6.78122	6.72531	6.8666
CAGL0D06666g	CAGL0D06666g	0.510562	0.523754	1.87756	1.06689	0.833988	1.34136
CAGL0L02629g	CAGL0L02629g	5.90261	5.85781	6.10603	5.93187	5.91499	5.98882
CAGL0J06204g	CAGL0J06204g	6.40614	6.45313	6.67473	6.35931	6.40916	6.41684
CAGL0D03828g	CAGL0D03828g	5.12435	4.963	5.15464	5.05132	5.1044	5.21831
CAGL0M00198g	CAGL0M00198g	5.75908	5.77047	5.78969	5.77717	5.90064	5.94127
CAGL0K12320g	CAGL0K12320g	3.95971	4.03568	3.75917	3.93975	3.96823	3.8783
CAGL0B04719g	CAGL0B04719g	4.85319	4.83461	5.03136	4.8397	4.84058	5.01732
CAGL0A03322g	CAGL0A03322g	5.75552	5.75978	5.81958	5.488	5.78404	5.77837
CAGL0L11374g	CAGL0L11374g	6.06611	6.14669	6.24849	6.03924	6.01998	6.11803
CAGL0F07601g	CAGL0F07601g	9.16676	9.43666	9.63475	10.5637	9.64139	9.74357
CAGL0I09042g	CAGL0I09042g	4.26962	4.19492	4.52944	4.2427	4.2367	4.2721
CAGL0D06556g	CAGL0D06556g	7.85201	7.87073	7.95806	7.95634	7.99275	7.8817
CAGL0J08778g	CAGL0J08778g	5.84232	5.83114	5.87537	5.74641	5.71394	5.7108
CaglfMp07	Cgai3	-1.31951	0.111776	-0.558025	-0.855573	-3.57352	0.32842
CAGL0G03509g	CAGL0G03509g	5.96048	6.02983	5.96554	5.90211	5.70442	5.97228
CAGL0I02838g	CAGL0I02838g	4.89912	5.09718	4.88356	4.8319	4.87035	4.99087
CAGL0K11198g	CAGL0K11198g	4.32113	4.32123	4.35986	4.44778	4.3407	4.53823
CAGL0A04455g	CAGL0A04455g	6.33373	6.47602	6.41097	6.33379	6.23759	6.42084
CAGL0F00913g	CAGL0F00913g	5.33273	5.39121	5.21428	5.22744	5.2367	5.35777
CAGL0M07447g	CAGL0M07447g	7.88234	7.8172	8.06337	7.83475	7.908	7.96792
CAGL0I03190g	RIP1	8.59175	8.68076	8.47792	8.47206	8.53559	8.61852
CAGL0H08371g	CAGL0H08371g	7.4643	7.48121	7.40899	7.22831	7.49025	7.39062
CAGL0M08008g	CAGL0M08008g	5.41783	5.44679	5.59969	5.29134	5.47724	5.43109
CAGL0F06259g	CAGL0F06259g	2.73697	2.8309	2.56109	2.6983	2.69119	2.68121
CAGL0M04389g	CAGL0M04389g	4.4964	4.50758	4.4799	4.39852	4.34469	4.63269
CAGL0G00528g	CAGL0G00528g	6.3535	6.45404	6.47305	6.24686	6.29084	6.32923
CAGL0H03861g	CAGL0H03861g	6.09998	6.09448	6.17101	6.07599	5.85577	6.03036
CAGL0L02343g	CAGL0L02343g	7.93151	7.92371	7.65844	7.90009	7.98687	7.9798
CAGL0M12617g	CAGL0M12617g	5.45783	5.4137	5.57126	5.39676	5.47057	5.64384
CAGL0J00407g	CAGL0J00407g	6.26878	6.24838	6.42581	6.23337	6.2392	6.44409
CAGL0M08294g	CAGL0M08294g	4.73637	4.78899	4.74426	4.55737	4.65691	4.8355
CAGL0G07491g	CAGL0G07491g	6.52423	6.6947	6.43624	6.51501	6.39291	6.50483
CAGL0K07007g	CAGL0K07007g	6.00667	6.00248	6.83147	5.95328	7.28645	6.82374
CAGL0K04961g	CAGL0K04961g	4.66664	4.56954	4.80126	4.6452	4.53152	4.69828
CAGL0M06985g	CAGL0M06985g	4.45601	4.54768	4.63988	4.42466	4.3993	4.51271
CAGL0K05005g	CAGL0K05005g	7.57716	7.55788	7.70999	7.39313	7.55505	7.63942
CAGL0H03201g	CAGL0H03201g	4.27377	4.19347	4.2349	4.16214	4.09261	4.26447
CAGL0K06985g	CAGL0K06985g	4.62691	4.59381	4.578	4.51095	4.58748	4.81129
CAGL0I06270g	CAGL0I06270g	8.68115	8.68808	8.58098	8.5231	8.60912	8.7665
CAGL0L08646g	CAGL0L08646g	5.74926	5.74163	5.85498	5.84777	5.69691	5.90904
CAGL0L12276g	CAGL0L12276g	5.1381	5.1409	4.90945	5.10672	5.0839	5.24567
CAGL0K01309g	CAGL0K01309g	4.60925	4.64804	4.54672	4.41773	4.59139	4.72321
CAGL0L07106g	CAGL0L07106g	5.6295	5.54937	5.75173	5.48883	5.60113	5.68534
CAGL0M13387g	CAGL0M13387g	-3.68208	-3.77087	-1.78832	-3.11191	-2.93609	-2.76556
CAGL0I02288g	CAGL0I02288g	5.15577	5.1558	5.16856	4.9209	5.20857	5.28345
CAGL0H09592g	CAGL0H09592g	-0.319513	0.273527	0.650789	0.648899	0.691188	0.772409
CAGL0K07139g	CAGL0K07139g	3.55905	3.62145	3.46543	3.5142	3.43771	3.66843
CAGL0I10604g	CAGL0I10604g	2.15081	2.06518	2.92275	3.23976	2.51865	2.44689
CAGL0F07623g	CAGL0F07623g	3.92313	4.04931	3.83542	4.02536	3.93692	4.02586
CAGL0F04565g	CAGL0F04565g	9.36825	9.45515	9.23562	9.28585	9.275	9.40656
CAGL0D05478g	CAGL0D05478g	6.40235	6.47156	6.35202	6.41839	6.15195	6.34999
CAGL0A00605g	CAGL0A00605g	4.97511	4.88198	4.84103	4.86981	5.00559	5.05069
CAGL0J05236g	CAGL0J05236g	6.474	6.56145	6.42188	6.30711	6.48387	6.59791
CAGL0B04477g	CAGL0B04477g	5.03069	5.03568	5.1374	4.86155	4.95483	4.94604
CAGL0H01727g	EUG1	9.33731	9.34108	9.41963	9.12649	9.20525	9.32458
CAGL0H06941g	CAGL0H06941g	4.12251	4.0533	4.19072	3.95657	4.12692	4.25681
CAGL0K07029g	CAGL0K07029g	4.47851	4.57731	4.42413	4.42466	4.25937	4.46252
CAGL0G07733g	CAGL0G07733g	5.37087	5.22843	5.4155	5.21352	5.32366	5.42161
CAGL0I03454g	CAGL0I03454g	6.77266	6.80065	6.6543	6.56502	6.71893	6.73429
CAGL0C05291g	CAGL0C05291g	5.19619	5.12319	5.34096	5.25926	5.22846	5.32923
CAGL0G06930g	CAGL0G06930g	4.0233	4.03407	3.91851	4.05355	3.89137	4.19222
CAGL0M09064g	CAGL0M09064g	5.25161	5.22878	5.35516	5.10241	5.28619	5.38848
CAGL0K05225g	CAGL0K05225g	6.36075	6.44345	6.6402	6.32086	6.34584	6.39179
CAGL0M10175g	CAGL0M10175g	6.29601	6.34239	6.21428	6.05996	6.37177	6.30653
CAGL0M12683g	CAGL0M12683g	6.75611	6.7415	6.76257	6.47784	6.68832	6.67164
CAGL0K11253g	CAGL0K11253g	4.72427	4.80845	4.84327	4.76119	4.79232	4.86884
CAGL0L08800g	CAGL0L08800g	7.47589	7.46627	7.68811	7.35513	7.54607	7.51593
CAGL0H05357g	CAGL0H05357g	5.34819	5.27966	5.40908	5.19237	5.31793	5.48602
CAGL0M11418g	CAGL0M11418g	5.53119	5.45585	5.51229	5.29086	5.46205	5.58283
CAGL0K07920g	CAGL0K07920g	4.87798	4.77313	5.00309	4.86854	4.98065	4.99139
CAGL0G04873g	CAGL0G04873g	5.62268	5.74409	5.73885	5.52552	5.54946	5.67035
CAGL0B01441g	CAGL0B01441g	6.10208	6.18133	5.98798	5.92182	6.16683	6.12038
CAGL0F07051g	CAGL0F07051g	5.89804	5.96363	6.96875	6.49089	6.24116	6.42389
CAGL0I01364g	CAGL0I01364g	2.90288	3.08244	3.00309	2.75434	2.92544	2.90904
CAGL0C05467g	CAGL0C05467g	-3.31951	-2.77087	-2.9038	-1.88952	-3.42151	-4.14407
CAGL0M05929g	CAGL0M05929g	6.87798	6.83172	7.01121	6.63124	6.86897	6.8517
CAGL0L06424g	CAGL0L06424g	10.466	10.594	10.5651	10.6136	10.4056	10.4395
CAGL0G02343g	CAGL0G02343g	5.49462	5.43645	5.55529	5.42854	5.62206	5.64449
CAGL0E04400g	CAGL0E04400g	5.37823	5.49709	5.34729	5.38261	5.23527	5.20864
CAGL0M03817g	CAGL0M03817g	4.58938	4.60905	4.63342	4.37905	4.48898	4.68185
CAGL0F03069g	CAD1	4.07947	4.05011	4.25691	4.04347	4.1672	4.21612
CAGL0D02508g	CAGL0D02508g	6.08893	6.12981	6.25901	6.03104	6.08589	6.28639
CAGL0H07117g	CAGL0H07117g	5.42569	5.48829	5.67897	5.38261	5.41011	5.52091
CAGL0I06875g	CAGL0I06875g	4.88723	4.87073	5.06439	4.85451	4.84434	5.08955
CAGL0G02035g	CKA2	6.27543	6.34092	6.45192	6.41491	6.28861	6.35438
CAGL0J08349g	CAGL0J08349g	5.89696	6.00885	5.75828	5.77818	5.93516	5.83035
CAGL0E01001g	CAGL0E01001g	6.67405	6.62761	6.74351	6.66415	6.81701	6.88246
CAGL0J03102g	CAGL0J03102g	5.77001	5.79946	5.82327	5.46384	5.82452	5.73582
CAGL0G05610g	CAGL0G05610g	4.29028	4.37507	5.25228	5.97437	4.76287	4.93275
CAGL0H03267g	CAGL0H03267g	6.67453	6.66181	6.75828	6.4516	6.57524	6.61516
CAGL0F00935g	PEX15	4.95661	4.90993	5.30971	4.94938	4.9356	5.0067
CAGL0A00297g	CAGL0A00297g	4.22481	4.21497	4.31537	4.22099	4.30437	4.51985
CAGL0K08052g	CAGL0K08052g	4.48139	4.35648	4.39312	4.38882	4.41769	4.59132
CAGL0C05225g	CAGL0C05225g	5.45747	5.41277	5.69828	5.42077	5.41169	5.56983
CAGL0K02651g	CAGL0K02651g	6.52476	6.47899	6.64759	6.34433	6.41375	6.50393
CAGL0L06578g	CAGL0L06578g	3.48211	3.32585	4.69921	4.01508	3.89318	4.07993
CAGL0M10769g	CAGL0M10769g	7.3156	7.30219	7.33838	7.29748	7.43078	7.62726
CAGL0H08481g	CAGL0H08481g	5.36971	5.3006	5.22677	5.25926	5.28031	5.44052
CAGL0C01903g	CAGL0C01903g	3.66917	3.63108	3.89386	3.65038	3.50211	3.70393
CAGL0M09339g	CAGL0M09339g	4.3474	4.45975	4.42637	4.12543	4.39419	4.37242
CAGL0M13211g	CAGL0M13211g	6.43073	6.40546	6.29873	6.27563	6.40853	6.58164
CAGL0I08767g	CAGL0I08767g	4.33472	4.36099	4.08394	4.34113	4.20566	4.40822
CAGL0F05379g	CAGL0F05379g	6.95363	6.98298	7.0805	6.74399	6.94765	7.06819
CAGL0C00561g	CAGL0C00561g	4.82571	4.74187	4.82015	4.59468	4.66807	4.81593
CAGL0M03685g	CAGL0M03685g	5.6858	5.69393	6.73131	6.46194	6.00748	6.11403
CAGL0D05346g	CAGL0D05346g	4.91942	4.90641	4.94691	4.68899	4.88364	4.73613
CAGL0F06347g	STV1	7.02318	7.07815	7.10824	6.72536	6.97166	7.0246
CAGL0C04477g	MED2	4.95454	5.09603	4.86934	5.06689	4.90761	5.05953
CAGL0K10890g	CAGL0K10890g	3.96486	4.14725	5.00959	4.67744	4.11765	4.45287
CAGL0M05049g	CAGL0M05049g	8.12694	8.12196	8.0186	7.89885	8.09493	8.24573
CAGL0I07755g	CAGL0I07755g	6.15103	6.1394	6.25313	5.94277	6.09419	6.26744
CAGL0J03564g	CAGL0J03564g	7.36728	7.4483	7.52892	7.14102	7.36721	7.34045
CAGL0I06963g	CAGL0I06963g	6.83009	6.83241	6.91425	6.61639	7.01145	6.84476
CAGL0K07766g	CAGL0K07766g	6.18608	6.23669	6.047	6.07214	6.35886	6.20621
CAGL0J04400g	CAGL0J04400g	3.65011	3.62894	3.79548	3.73914	3.75441	3.78903
CAGL0H02299g	CAGL0H02299g	4.22051	4.31195	4.21946	4.206	4.12384	4.517
CAGL0J05918g	CAGL0J05918g	7.80877	7.85484	7.83619	7.47753	7.88307	7.78733
CAGL0C02387g	CAGL0C02387g	2.53847	2.4483	2.35044	2.35116	2.50449	2.53963
CAGL0D05720g	CAGL0D05720g	5.42495	5.46485	5.53152	5.18373	5.39771	5.33894
CAGL0L13288g	CAGL0L13288g	5.22524	5.32749	5.073	5.08994	5.17691	5.28847
CAGL0L04994g	CAGL0L04994g	3.8132	3.70081	3.82071	3.85643	3.6995	4.03783
CAGL0B03553g	CAGL0B03553g	7.83692	7.76094	7.96721	7.75416	7.81737	8.03067
CAGL0C02849g	CAGL0C02849g	4.56584	4.54202	4.65971	4.41339	4.40694	4.63991
CAGL0L04620g	CAGL0L04620g	4.93683	4.97102	4.98037	4.6318	4.84152	4.91013
CAGL0G00176g	CAGL0G00176g	8.4758	8.42658	8.63504	8.32705	8.57771	8.52176
CAGL0H08305g	CAGL0H08305g	5.15982	5.20355	5.48242	5.53754	6.17151	5.93542
CAGL0G10131g	CAGL0G10131g	8.94036	9.01522	8.74107	8.74378	8.90949	8.9475
CAGL0J10274g	CAGL0J10274g	5.47671	5.47647	5.27818	5.18984	5.46021	5.48383
CAGL0K05577g	CAGL0K05577g	5.32514	5.34548	5.45118	5.3835	5.3993	5.55603
CAGL0I03916g	CAGL0I03916g	9.04839	8.98738	9.10749	8.85723	8.96173	8.93612
CAGL0E02233g	CAGL0E02233g	3.8736	4.0995	4.93383	4.30688	4.43273	4.22575
CAGL0G00242g	YOR1	6.50933	6.52934	6.48422	6.26385	6.59293	6.64579
CAGL0D02772g	CAGL0D02772g	5.85652	5.72898	5.93829	5.94968	5.77053	5.98005
CAGL0A03080g	CAGL0A03080g	3.78086	3.89447	4.02299	3.82145	3.73128	3.84802
CAGL0M02255g	CAGL0M02255g	5.99186	5.97921	6.21146	5.8625	6.03052	6.10528
CAGL0A03806g	CAGL0A03806g	-0.682083	-0.395828	1.15509	0.144427	-0.085229	-0.039731
CAGL0J06248g	CAGL0J06248g	6.62804	6.72336	6.89616	6.53194	6.60915	6.66602
CAGL0H01771g	CAGL0H01771g	5.14219	4.99525	5.14241	4.90984	5.07434	5.21172
CAGL0E03432g	CAGL0E03432g	4.29028	4.25289	4.4596	4.01508	4.2817	4.26363
CAGL0C05511g	CAGL0C05511g	8.14077	8.03442	8.25744	8.03798	8.08316	8.27473
CAGL0I03718g	CAGL0I03718g	8.71069	8.7956	8.86428	8.56537	8.64505	8.6402
CAGL0L01199g	CAGL0L01199g	4.99689	5.0636	5.15013	4.93127	5.18951	5.03882
CAGL0C04961g	CAGL0C04961g	6.65474	6.59327	6.84551	6.65774	6.50048	6.54261
CAGL0L07854g	CAGL0L07854g	6.81677	6.86496	6.99379	6.73183	6.74528	6.67595
CAGL0F07733g	CAGL0F07733g	5.92445	5.84177	5.86851	5.62655	5.93406	6.00161
CAGL0I08855g	CAGL0I08855g	5.39626	5.39373	5.6846	5.26891	5.44916	5.44876
CAGL0K07293g	CAGL0K07293g	9.11248	9.07712	9.07109	8.82852	9.18889	9.19931
CAGL0G06886g	CAGL0G06886g	7.63872	7.59368	7.84767	7.51866	7.49452	7.63261
CAGL0J04862g	CAGL0J04862g	4.87634	4.81033	4.82185	4.70614	4.76485	4.99855
CAGL0C02409g	CAGL0C02409g	5.54879	5.66402	5.56075	5.29512	5.51277	5.65845
CAGL0F07293g	CAGL0F07293g	6.31469	6.34239	6.24404	5.93884	6.35886	6.3057
CAGL0G06578g	CAGL0G06578g	5.47671	5.36292	5.45741	5.23386	5.35558	5.50806
CAGL0G06820g	CAGL0G06820g	4.27045	4.24106	4.42038	4.19288	4.20347	4.47652
CAGL0M09361g	CAGL0M09361g	7.16833	7.17677	7.48905	7.11771	7.15667	7.30694
CAGL0E00407g	CAGL0E00407g	5.42158	5.30361	5.53983	5.33011	5.27962	5.48201
CAGL0E03113g	CAGL0E03113g	5.08468	5.24629	5.71978	6.32457	5.49168	5.6523
CAGL0K11946g	CAGL0K11946g	2.83924	2.82532	3.27113	2.87551	2.82071	2.8078
CAGL0I02244g	CAGL0I02244g	4.7861	4.75073	5.04067	4.74261	4.6553	4.8548
CAGL0L10230g	CAGL0L10230g	4.72973	4.555	4.81445	4.72027	4.81115	4.91284
CAGL0J09768g	CAGL0J09768g	4.93578	4.80939	6.20385	5.37101	5.5751	5.53647
CAGL0H01287g	CAGL0H01287g	7.58604	7.70195	7.77142	7.41968	7.5567	7.62346
CAGL0J11990g	AWP4	-3.90448	-3.77087	-2.78832	-2.82241	-5.74344	-3.14407
CAGL0C00341g	CAGL0C00341g	4.99034	4.92784	5.00609	5.03953	5.25021	5.13948
CAGL0H08459g	CAGL0H08459g	6.4731	6.39859	6.50912	6.09293	6.42727	6.47303
CAGL0G02541g	CAGL0G02541g	5.79452	5.90045	5.87565	5.70294	5.60418	5.7263
CAGL0G10065g	CAGL0G10065g	5.41143	5.38078	5.24128	5.20198	5.29136	5.40244
CAGL0F06985g	CAGL0F06985g	4.73758	4.75612	4.95003	4.81882	4.84761	4.85537
CAGL0H00825g	CAGL0H00825g	4.41745	4.46574	4.13786	4.34113	4.45807	4.51271
CAGL0D03322g	CAGL0D03322g	7.25687	7.33782	7.6236	7.43058	8.19007	8.27115
CAGL0I08217g	CAGL0I08217g	8.22786	8.23931	8.38799	7.95163	8.19329	8.16984
CAGL0L01309g	CAGL0L01309g	7.28761	7.318	7.28798	6.95462	7.35591	7.17809
CAGL0H01144g	CAGL0H01144g	4.75611	4.69979	5.80729	5.41469	4.98661	5.4036
CAGL0K08910g	CAGL0K08910g	7.47391	7.42381	7.60176	7.22979	7.58699	7.46502
CAGL0K11418g	ADK1	7.35546	7.54775	7.34719	7.2671	7.57489	7.31966
CAGL0F05819g	CAGL0F05819g	4.3817	4.27966	4.44861	4.24074	4.25021	4.48529
CAGL0M05137g	CAGL0M05137g	6.24506	6.36868	6.29075	6.17734	6.27215	6.52606
CAGL0H00242g	CAGL0H00242g	8.91157	8.9251	9.0628	8.70418	8.84196	8.80769
CAGL0H04103g	CAGL0H04103g	6.11604	6.03709	6.13968	5.80397	6.09281	6.00771
CAGL0F03135g	CAGL0F03135g	7.80841	7.77452	8.08163	7.63553	7.86464	7.79771
CAGL0K05489g	CAGL0K05489g	5.45564	5.27728	5.64342	5.45329	5.28929	5.46917
CAGL0A04807g	CAGL0A04807g	7.30223	7.26221	7.40899	6.97024	7.36198	7.2915
CAGL0K02365g	CAGL0K02365g	5.60067	5.56731	5.75203	5.4651	5.42398	5.54837
CAGL0L06688g	CAGL0L06688g	5.64467	5.67337	5.65685	5.28279	5.69691	5.73919
CAGL0F02761g	CAGL0F02761g	5.82344	5.68318	5.79577	5.55776	5.79911	5.91582
CAGL0D06292g	CAGL0D06292g	7.56203	7.54237	7.72867	7.35082	7.66502	7.512
CAGL0G03399g	CAGL0G03399g	6.25476	6.28289	6.5277	6.21001	6.35031	6.36511
CAGL0D02112g	CAGL0D02112g	5.77618	5.78827	5.99077	5.59889	5.86019	5.84092
CAGL0E03982g	CAGL0E03982g	7.09282	7.07354	7.2527	7.13245	7.27545	7.24449
CAGL0K02321g	CAGL0K02321g	3.4964	3.61823	3.66225	3.53834	3.67019	3.54663
CAGL0C02607g	CAGL0C02607g	5.47237	5.41927	5.63342	5.28754	5.34965	5.50519
CAGL0K10956g	CAGL0K10956g	5.75671	5.87254	5.94195	5.85163	5.89996	5.7733
CAGL0D02150g	CAGL0D02150g	3.55085	3.46634	3.80701	3.51095	3.47694	3.65295
CAGL0K05731g	CAGL0K05731g	6.69946	6.63879	7.07622	6.75742	6.64767	6.68882
CAGL0D04488g	CAGL0D04488g	-0.131886	-0.070427	1.15509	0.683946	-0.029195	0.733677
CAGL0K09262g	CAGL0K09262g	5.08705	5.05648	4.89548	4.8043	5.04813	5.10196
CAGL0M03355g	CAGL0M03355g	7.40045	7.30937	7.68554	7.38516	7.27441	7.44249
CAGL0L07568g	CAGL0L07568g	-0.489438	-0.247305	0.555632	0.110479	-0.158478	-0.056605
CAGL0A04785g	RTG2	6.84162	6.85872	6.91158	7.0053	7.04232	6.95331
CAGL0B03905g	CAGL0B03905g	6.28987	6.35115	6.26404	5.98933	6.36476	6.39062
CAGL0B03773g	CAGL0B03773g	8.07917	8.11053	7.85283	7.987	8.16223	7.94618
CAGL0G02321g	CAGL0G02321g	5.25708	5.20713	5.44419	5.09103	5.3427	5.3345
CAGL0I07029g	CAGL0I07029g	3.75493	3.71496	3.52386	3.57147	3.70054	3.69765
CAGL0G05005g	CAGL0G05005g	4.44278	4.28712	4.71581	4.37994	4.44824	4.51414
CAGL0K05863g	CAGL0K05863g	6.91437	6.97092	7.0675	6.57167	6.92356	6.92256
CAGL0G03333g	CAGL0G03333g	3.44867	3.3978	3.19774	3.43241	3.59307	3.55637
CAGL0L08404g	CAGL0L08404g	2.46476	2.53063	2.52246	2.47305	2.55348	2.81478
CAGL0L12628g	CAGL0L12628g	3.95454	3.98486	4.03969	3.76665	3.79766	3.84348
CAGL0F06963g	CAGL0F06963g	2.93473	2.93131	2.87756	3.0265	2.64458	2.80547
CAGL0F04235g	CAGL0F04235g	3.57396	3.56341	3.66858	3.32364	3.69015	3.67483
CAGL0L11418g	CAGL0L11418g	5.69016	5.66298	5.74486	5.46761	5.50152	5.61049
CAGL0K12584g	CAGL0K12584g	5.50527	5.42543	5.65047	5.57225	5.59975	5.69167
CAGL0G07887g	CAGL0G07887g	6.93735	6.88075	7.31497	6.92807	6.93944	7.06478
CAGL0C04169g	CAGL0C04169g	4.26378	4.24524	4.22376	4.32272	4.03546	4.49111
CAGL0F00187g	CAGL0F00187g	4.32113	4.25289	5.47269	5.05467	4.62779	4.93861
CAGL0J05632g	CAGL0J05632g	4.92578	4.78755	5.26946	4.91722	4.93031	5.00619
CAGL0J10472g	CAGL0J10472g	5.29397	5.337	5.70507	5.26264	5.38036	5.29763
CAGL0F00957g	TPD3	7.91643	7.81251	8.05873	7.6699	7.85769	7.94147
CAGL0J02200g	CAGL0J02200g	4.56381	4.63268	5.69673	5.18729	5.06311	5.08235
CAGL0E06468g	CAGL0E06468g	6.97076	7.01162	7.60201	7.07805	8.0333	7.83121
CAGL0H01639g	CAGL0H01639g	3.87798	3.82625	5.10649	4.48137	4.47512	4.43336
CAGL0K10692g	CAGL0K10692g	5.60497	5.5003	5.7213	5.41121	5.44916	5.61382
CAGL0L02739g	CAGL0L02739g	2.74178	2.83461	2.60663	2.57925	2.62288	2.81245
CAGL0C00627g	CAGL0C00627g	4.46549	4.44102	4.77216	4.52552	4.39483	4.58453
CAGL0E02057g	CAGL0E02057g	3.01041	2.91913	3.09995	3.12967	2.84715	3.12833
CAGL0E01397g	CAGL0E01397g	5.99261	5.99918	6.07586	5.78122	5.82166	5.88052
CAGL0K00275g	CAGL0K00275g	7.02995	7.05707	7.26268	6.88244	7.15327	7.08439
CAGL0B01551g	CAGL0B01551g	6.76175	6.78372	6.80111	6.39346	6.66608	6.70189
CAGL0F05995g	MSN2	5.48533	5.47498	5.92354	5.37325	5.48988	5.46437
CAGL0J07326g	CAGL0J07326g	4.57396	4.6622	4.54604	4.46887	4.61301	4.90142
CAGL0C00583g	CAGL0C00583g	5.16743	5.05568	5.32622	5.05132	5.0997	5.30095
CAGL0G01298g	CAGL0G01298g	5.67735	5.58669	5.94117	5.53314	5.65129	5.74071
CAGL0J04774g	CAGL0J04774g	5.82486	5.7436	5.90838	5.4431	5.85717	5.81535
CAGL0L03564g	CAGL0L03564g	7.18696	7.14193	7.42394	6.93415	7.2113	7.15709
CAGL0A03256g	CAGL0A03256g	4.25455	4.24106	4.30728	4.00356	4.11997	4.39199
CAGL0H07777g	CAGL0H07777g	6.64017	6.65775	6.89952	6.42379	6.68884	6.68772
CAGL0H01815g	CBF1	5.47671	5.50584	5.527	5.63404	5.13844	5.46178
CAGL0H09878g	IPP1	9.31769	9.35727	10.3341	10.1523	9.77937	9.58842
CAGL0G01430g	CAGL0G01430g	7.57421	7.57218	7.38603	7.32156	7.67131	7.62651
CAGL0M04235g	CAGL0M04235g	4.72791	4.66115	4.77509	4.42033	4.57284	4.71205
CAGL0A02618g	CAGL0A02618g	4.05166	4.05409	4.32902	4.12861	4.11532	4.224
CAGL0G04719g	CAGL0G04719g	5.41708	5.41463	5.68335	5.27754	5.34899	5.53365
CAGL0G08800g	CAGL0G08800g	6.27377	6.24977	6.20233	5.96668	6.14226	6.21304
CAGL0J02728g	CAGL0J02728g	4.93997	4.91257	5.22934	4.94156	4.97595	5.18191
CAGL0J08052g	CAGL0J08052g	6.99085	7.05915	7.14662	6.78795	7.15043	6.98109
CAGL0L12848g	CAGL0L12848g	5.71269	5.65277	5.90757	5.82571	5.65984	5.88936
CAGL0F08657g	PEX23	6.79553	6.71672	6.99051	6.61374	6.75466	6.89718
CAGL0K09812g	CAGL0K09812g	5.70839	5.63055	5.94691	5.56835	5.71625	5.57224
CAGL0I08239g	CAGL0I08239g	8.3384	8.24198	8.49338	8.05034	8.36316	8.30209
CAGL0M06017g	CAGL0M06017g	5.82089	5.76926	5.66035	5.64446	5.70777	5.92148
CAGL0E03421g	CAGL0E03421g	3.59802	3.62681	3.83879	3.47472	3.72823	3.67739
CAGL0G10087g	CAGL0G10087g	6.84735	7.01162	6.83147	6.69024	6.70132	6.72661
CAGL0L06996g	CAGL0L06996g	2.50208	2.42389	2.59072	2.36921	2.58523	2.72383
CAGL0A00253g	CAGL0A00253g	6.80072	6.77144	6.80327	6.4399	6.69418	6.69529
CAGL0L03454g	CAGL0L03454g	4.30903	4.37188	4.18012	4.30406	4.27058	4.6793
CAGL0A04059g	NMT1	5.7653	5.86304	5.46398	5.62505	5.75641	5.70768
CAGL0D01540g	CAGL0D01540g	6.83952	6.80396	6.94064	6.58312	6.78024	6.68581
CAGL0E02519g	CAGL0E02519g	6.65123	6.62641	6.80154	6.35795	6.67375	6.76822
CAGL0A03058g	CAGL0A03058g	5.92525	6.02558	6.10019	5.81587	5.89114	6.1145
CAGL0M03751g	CAGL0M03751g	4.2911	4.37443	4.22977	3.97555	4.26218	4.41129
CAGL0A00803g	CAGL0A00803g	5.55769	5.60145	5.51159	5.20047	5.43149	5.59402
CAGL0L10252g	CAGL0L10252g	2.71269	2.87659	3.84774	3.61903	2.40631	3.0809
CAGL0F03883g	GAS4	7.75247	7.75453	7.92572	7.85715	7.75983	8.07607
CAGL0M09867g	CAGL0M09867g	3.01041	2.86938	3.20994	3.04684	3.09103	3.16518
CAGL0I03564g	CAGL0I03564g	4.55973	4.65172	4.75738	4.49624	4.47694	4.73796
CAGL0J00605g	CAGL0J00605g	8.54433	8.56968	8.8184	8.40751	8.68066	8.58632
CAGL0M13475g	CAGL0M13475g	5.71819	5.66741	6.00609	5.60881	5.61631	5.7843
CAGL0G02497g	CAGL0G02497g	5.70347	5.75563	5.73403	5.52713	5.40408	5.64547
CAGL0J02860g	CAGL0J02860g	4.44425	4.30394	4.36455	4.46635	4.58916	4.67483
CAGL0K05269g	CAGL0K05269g	3.81434	3.87749	4.83879	4.66653	3.91656	4.4409
CAGL0M07612g	CAGL0M07612g	6.28741	6.40359	6.5633	7.08271	6.79438	7.36194
CAGL0C01881g	CAGL0C01881g	4.88994	5.0393	4.91531	4.56835	4.78355	4.90796
CAGL0E03718g	SNF6	4.54261	4.57121	4.80643	4.65038	4.48056	4.70142
CAGL0J06160g	CAGL0J06160g	4.81377	4.95023	4.66352	4.79831	4.82831	5.1185
CAGL0B04741g	PGS1	5.64049	5.65775	5.65653	5.34524	5.42648	5.56087
CAGL0D03344g	CAGL0D03344g	4.59471	4.85301	4.62758	4.28802	4.59697	4.61682
CAGL0F05401g	CAGL0F05401g	6.09693	6.06952	6.16878	6.16886	6.19669	6.44839
CAGL0L02959g	CAGL0L02959g	5.67012	5.65723	5.74486	5.77209	5.76732	6.0067
CAGL0F06171g	nup116	6.89548	6.99235	7.10615	6.96861	6.98086	7.05303
CAGL0B00594g	CAGL0B00594g	9.05238	9.02144	9.22073	9.07506	9.00698	8.69577
CAGL0J03586g	CAGL0J03586g	4.48498	4.45855	4.44271	4.28326	4.52802	4.79551
CAGL0F01397g	CAGL0F01397g	7.0428	7.04422	7.42057	7.11209	7.09133	7.17018
CAGL0H02123g	CAGL0H02123g	5.08042	5.29219	5.18278	5.10618	5.18026	5.26532
CAGL0M02453g	CAGL0M02453g	4.56652	4.57287	4.51194	4.1339	4.49018	4.50985
CAGL0D03058g	CAGL0D03058g	7.07816	7.13565	7.14933	6.83986	7.25524	6.99548
CAGL0H04235g	CAGL0H04235g	5.31832	5.14949	5.29996	5.0932	5.18914	5.4036
CAGL0K08008g	CAGL0K08008g	6.49498	6.43355	6.48744	6.19668	6.31979	6.41033
CAGL0K03553g	FOL3	7.7191	7.65939	7.974	7.6593	7.74	7.48629
CAGL0E01199g	CAGL0E01199g	7.01003	7.03296	6.7393	6.71975	6.96554	7.00974
CAGL0M11462g	CAGL0M11462g	5.72488	5.83739	5.42861	5.64668	5.78233	5.80926
CAGL0G10153g	CAGL0G10153g	8.69563	8.75624	8.82331	8.68975	8.87695	8.95192
CAGL0H06919g	CAGL0H06919g	7.58571	7.62534	7.89305	7.33264	7.59905	7.56691
CAGL0L08492g	CAGL0L08492g	6.6109	6.59641	6.84439	6.59161	6.25427	6.60178
CAGL0J07216g	CAGL0J07216g	4.41218	4.38205	4.28931	3.96253	4.41643	4.38575
CAGL0F07249g	CAGL0F07249g	4.76323	4.85256	4.69363	4.86091	4.94961	4.95607
CAGL0M02431g	KES1	8.5285	8.58579	8.79393	8.51034	8.6528	8.69997
CAGL0D05522g	CAGL0D05522g	6.00667	5.95151	6.32	5.79998	5.965	5.98599
CAGL0H08998g	CAGL0H08998g	5.06131	5.03568	5.42038	5.17606	5.16307	5.02486
CAGL0M01364g	CBF3D	7.01203	6.90443	7.14525	7.1813	6.89793	7.12576
CAGL0M11044g	CAGL0M11044g	-1.24151	-1.56141	-1.24083	-1.28184	-1.38589	-1.10844
CAGL0J08437g	CAGL0J08437g	7.14049	7.1689	7.46325	7.03868	7.24844	7.21908
CAGL0L03201g	CAGL0L03201g	4.73396	4.63214	4.69921	4.4212	4.56774	4.70893
CAGL0G10175g	AWP6	4.99287	4.95109	5.38814	4.9655	4.82023	4.98882
CAGL0F06743g	CAGL0F06743g	5.51724	5.57758	6.29792	6.56913	5.94656	5.93994
CAGL0B04895g	CAGL0B04895g	6.04681	5.9668	6.31234	5.94638	5.87219	6.02611
CAGL0K10032g	CAGL0K10032g	4.11233	4.04851	4.31618	4.04459	4.15893	4.37242
CAGL0H08129g	CAGL0H08129g	5.29315	5.19492	5.31375	4.95657	5.19209	5.20687
CAGL0L07084g	CAGL0L07084g	5.04194	5.00557	5.44271	4.98612	5.04772	5.18685
CAGL0M00220g	CAGL0M00220g	9.13656	9.20449	9.25418	8.95028	8.9453	9.05588
CAGL0L04642g	CAGL0L04642g	7.8189	7.83577	7.91312	7.44076	7.67428	7.80802
CAGL0L04004g	CAGL0L04004g	7.36407	7.38522	7.44059	7.14325	7.17216	7.22934
CAGL0H05489g	CAGL0H05489g	8.77815	8.84735	8.95548	8.79168	8.93598	9.00571
CAGL0H07843g	HAP2	5.57564	5.45675	5.65526	5.21052	5.521	5.54837
CAGL0K12914g	CAGL0K12914g	7.12665	7.07893	7.08157	6.95851	6.88796	6.97954
CAGL0H07909g	CAGL0H07909g	6.4298	6.40904	6.73765	6.53294	6.45162	6.62329
CAGL0K06655g	CAGL0K06655g	5.80231	5.99172	5.63891	5.66762	5.85088	5.91338
CAGL0B01331g	CAGL0B01331g	5.36465	5.2766	5.34965	5.1878	5.10127	5.26065
CAGL0F08415g	CAGL0F08415g	5.64723	5.59819	5.59339	5.42077	5.53443	5.4409
CAGL0I09768g	CAGL0I09768g	3.78901	3.67	3.61584	3.65185	3.79862	3.99855
CAGL0H01749g	CAGL0H01749g	2.30172	2.21497	2.44493	2.18577	2.33871	2.56743
CAGL0H06303g	CAGL0H06303g	5.47815	5.42389	5.62856	5.60195	5.60971	5.66683
CAGL0J11726g	CAGL0J11726g	5.6437	5.54965	5.874	5.62843	5.73685	5.85987
CAGL0H07139g	CAGL0H07139g	3.79133	3.71697	3.79317	3.66214	3.43895	3.88273
CAGL0M12298g	CAGL0M12298g	5.90877	5.95301	6.1578	5.87929	6.09852	6.04551
CAGL0F05797g	CAGL0F05797g	4.82571	4.92044	4.83879	4.41339	4.84105	4.93968
CAGL0I05098g	CAGL0I05098g	7.40547	7.35777	7.57337	7.53824	7.58327	7.5288
CAGL0I04972g	CAGL0I04972g	2.78202	2.64064	3.5827	4.27179	3.3132	3.44988
CAGL0B02717g	CAGL0B02717g	10.0647	10.0665	10.3522	9.97827	9.8812	9.972
CAGL0I00220g	EPA23	5.36932	5.46963	5.53638	5.30453	5.12654	5.29139
CAGL0M07898g	CAGL0M07898g	5.28205	5.18078	5.05765	5.39324	5.21003	5.42693
CaglfMp04	COX1	-0.339691	0.880185	0.081093	-0.500478	-2.65598	0.683752
CAGL0G03861g	CAGL0G03861g	4.44941	4.45675	4.65971	4.61903	4.22595	4.40514
CAGL0L08910g	CAGL0L08910g	5.33234	5.23616	5.39235	5.11209	5.07194	5.31372
CAGL0B04631g	INP53	7.45372	7.46193	7.80075	7.36483	7.55219	7.567
CAGL0C00209g	AWP7	5.08421	5.08127	5.30565	5.23632	5.0152	5.29472
CAGL0K00385g	CAGL0K00385g	4.83023	4.74237	5.00058	4.90675	4.93912	5.04279
CAGL0G07689g	CAGL0G07689g	6.98667	6.9726	8.14196	7.53385	7.58348	7.64032
CAGL0L01881g	CAGL0L01881g	8.66225	8.61772	8.90134	8.58588	8.8098	8.81122
CAGL0H09306g	CAGL0H09306g	5.28864	5.35616	5.55392	5.10726	5.20456	5.2288
CAGL0K10318g	CAGL0K10318g	5.67138	5.65251	5.86714	5.42681	5.70338	5.83836
CAGL0G09383g	TDH3	14.3113	14.318	14.2548	14.1746	14.6498	14.4311
CAGL0K03707g	CAGL0K03707g	5.09364	5.18297	5.29832	4.9867	4.91164	5.01681
CAGL0K09944g	CAGL0K09944g	6.69977	6.58833	6.9569	6.62806	6.80899	6.81027
CAGL0J08998g	CAGL0J08998g	7.12745	7.38616	7.19259	7.07034	7.27406	7.26065
CAGL0M12254g	CAGL0M12254g	4.35918	4.41648	4.48565	4.33011	4.03052	4.47872
CAGL0K01881g	CAGL0K01881g	3.96897	4.00227	4.06487	4.09862	4.13384	4.2082
CAGL0H05203g	CAGL0H05203g	4.45747	4.39089	4.6119	4.32919	4.27823	4.592
CAGL0D03498g	CAGL0D03498g	6.06467	6.1595	6.2889	6.04936	6.25937	6.19912
CAGL0L05302g	CAGL0L05302g	5.33393	5.25877	5.26278	5.11477	5.14264	5.22662
CAGL0M13585g	CAGL0M13585g	5.42345	5.47825	5.69456	5.38394	5.58832	5.55741
CAGL0B02970g	BMT5	5.02577	5.17238	5.23276	4.93369	4.87035	4.96236
CAGL0K09108g	CAGL0K09108g	4.94049	4.8869	4.91372	4.58157	5.0297	5.07704
CAGL0J06072g	CAGL0J06072g	6.18564	6.25583	6.19138	5.8358	6.07374	6.05781
CAGL0M08316g	CAGL0M08316g	4.94883	5.06044	5.37388	4.96905	4.99803	5.00923
CAGL0K11088g	CAGL0K11088g	8.62398	8.65356	8.72908	8.39665	8.47747	8.46548
CAGL0I05324g	CAGL0I05324g	6.00317	6.17	6.34887	5.99835	5.9435	5.91311
CAGL0K00649g	CAGL0K00649g	6.78712	6.71735	6.85262	6.42746	6.63824	6.76312
CAGL0J07546g	KEX2	6.58738	6.61081	6.8014	6.48883	6.72366	6.78327
CAGL0C02453g	CAGL0C02453g	6.03339	6.06301	6.1342	6.06246	6.24524	6.33106
CAGL0F03443g	CAGL0F03443g	5.3159	5.37379	5.20385	4.99545	5.27372	5.17921
CAGL0E03179g	CAGL0E03179g	5.17767	5.19058	5.34729	5.15851	5.37258	5.45063
CAGL0M03553g	CAGL0M03553g	5.72306	5.84108	5.77802	5.7748	5.9424	5.94869
CAGL0K09746g	CAGL0K09746g	4.66411	4.67052	4.56313	4.41078	4.52861	4.8395
CAGL0J03278g	CAGL0J03278g	2.99236	2.93649	2.98494	2.71816	2.88955	3.224
CAGL0I02816g	CAGL0I02816g	4.85041	4.91344	4.65781	4.65259	4.80538	4.67611
CAGL0J10120g	CAGL0J10120g	5.2338	5.26393	5.22075	5.00587	4.84761	5.24954
CAGL0F02959g	CAGL0F02959g	5.12895	5.04372	5.21254	5.00645	5.35262	5.28722
CAGL0L09823g	CAGL0L09823g	3.31308	3.46754	3.11486	3.26506	3.06069	3.33329
CAGL0F08965g	CAGL0F08965g	8.47855	8.51735	8.60906	8.35897	8.65467	8.68799
CAGL0A02838g	CAGL0A02838g	4.3001	4.41834	4.45302	4.46719	4.26988	4.50698
CAGL0J11880g	CAGL0J11880g	7.23284	7.12338	7.45311	7.32792	7.02547	7.18842
CAGL0I03410g	CAGL0I03410g	6.70439	6.69712	6.67095	6.27945	6.53965	6.65764
CAGL0G01496g	COG6	5.74208	5.80231	5.98317	5.4718	5.6408	5.73766
CAGL0J08569g	CAGL0J08569g	8.48278	8.5235	8.37063	8.31877	8.33638	8.26718
CAGL0D00814g	CAGL0D00814g	5.94206	5.94831	6.00834	5.57537	5.83776	5.80576
CAGL0J02068g	CAGL0J02068g	7.19903	7.18297	7.63544	7.13799	7.23294	7.33197
CAGL0L13112g	RGR1	7.05166	6.9726	7.08003	6.77565	6.85775	6.94737
CAGL0M07315g	CAGL0M07315g	6.53414	6.59108	7.03664	7.07516	7.21566	7.63417
CAGL0M13321g	CAGL0M13321g	6.75745	6.86734	6.76774	6.37168	6.89058	6.80094
CAGL0G09295g	CAGL0G09295g	5.4907	5.44224	5.42674	5.28991	5.33971	5.70924
CAGL0J08459g	CAGL0J08459g	6.43315	6.39263	6.65446	6.20298	6.49586	6.56191
CAGL0B00418g	CAGL0B00418g	7.43194	7.448	7.76205	7.38926	7.59125	7.56726
CAGL0J08371g	CAGL0J08371g	1.85486	1.77988	2.92698	2.60691	2.13614	2.50267
CAGL0B02211g	CCH1	5.46948	5.50438	5.41399	5.03048	5.41769	5.3665
CAGL0D02926g	CAGL0D02926g	3.86591	3.96384	3.69239	3.82799	4.06391	4.04378
CAGL0F08855g	CAGL0F08855g	5.10115	5.11597	5.24468	4.62505	5.1126	5.14134
CAGL0H03465g	CAGL0H03465g	2.76559	2.75465	3.11857	2.61601	2.83399	2.87163
CAGL0I02772g	CAGL0I02772g	5.3387	5.23581	5.39808	4.97967	5.28343	5.22706
CAGL0J04180g	CAGL0J04180g	6.28782	6.1987	6.59339	6.18041	6.21185	6.398
CAGL0L13178g	CAGL0L13178g	5.45893	5.44436	5.68616	5.3425	5.59697	5.651
CAGL0I06919g	CAGL0I06919g	5.20361	5.1409	5.13146	4.96846	4.9103	5.17831
CAGL0K09548g	CAGL0K09548g	7.38122	7.37108	8.40293	7.84841	7.88597	8.11067
CAGL0J01177g	CAGL0J01177g	4.64755	4.84752	4.57126	4.77953	4.45316	4.55776
CAGL0M11924g	CAGL0M11924g	3.3001	3.36868	3.18896	2.96846	3.17094	3.35259
CAGL0K05203g	CAGL0K05203g	8.54888	8.59334	9.55311	9.18949	9.0463	9.06395
CAGL0L05368g	CAGL0L05368g	4.67484	4.72299	4.41587	4.82669	4.52977	4.76463
CAGL0K05797g	CAGL0K05797g	4.99236	4.97313	5.12226	4.73706	4.84715	4.84802
CAGL0J07128g	CAGL0J07128g	8.2872	8.20512	8.27253	7.86298	8.25603	8.14445
CAGL0B01353g	SPT20	5.90717	5.87006	6.09055	5.85034	6.11862	6.11356
CAGL0L03113g	CAGL0L03113g	6.14265	6.19474	6.25313	5.80463	6.00496	6.08523
CAGL0G07579g	CAGL0G07579g	5.58971	5.68805	5.89143	5.4768	5.42178	5.60513
CAGL0L02145g	CAGL0L02145g	5.51759	5.49592	5.90168	5.55894	5.60086	5.68407
CAGL0M10747g	CAGL0M10747g	5.55256	5.44133	5.37	5.36021	5.48868	5.69954
CAGL0B02497g	CAGL0B02497g	6.15171	6.30712	6.39254	6.32711	6.11997	6.2461
CAGL0A04323g	CAGL0A04323g	5.20448	5.11978	5.19116	5.07021	5.40979	5.46659
CAGL0D05698g	CAGL0D05698g	4.68424	4.79424	4.64759	4.60919	4.8625	4.98418
CAGL0B00286g	CAGL0B00286g	4.53639	4.60091	4.48134	4.33103	4.30845	4.68439
CAGL0H07381g	CAGL0H07381g	3.07471	3.01867	3.07157	3.01966	2.74038	2.82172
CAGL0K02079g	GLC7	8.80407	8.71499	8.65279	8.6186	8.67029	8.66107
CAGL0K12122g	CAGL0K12122g	3.89102	3.90333	3.75798	3.57925	3.87953	4.12553
CAGL0L06930g	CAGL0L06930g	3.65649	3.66376	3.74486	3.39764	3.80923	3.85255
CAGL0H07623g	CAGL0H07623g	4.45234	4.31991	4.74845	4.45456	4.54658	4.63138
CAGL0F04477g	CAGL0F04477g	7.61016	7.58696	7.60209	7.12715	7.57884	7.451
CAGL0I03674g	CAGL0I03674g	7.56931	7.51951	7.86321	7.57215	7.74365	7.7534
CAGL0E03806g	CAGL0E03806g	5.68767	5.61984	5.44898	5.52753	5.56575	5.56983
CAGL0L07172g	CAGL0L07172g	8.54433	8.63978	8.63378	8.41372	8.3253	8.37045
CAGL0L09889g	CAGL0L09889g	6.14945	6.1493	6.14967	5.81882	5.98618	5.93515
CAGL0I09460g	CAGL0I09460g	5.4673	5.40811	5.59837	5.14023	5.647	5.4551
CAGL0A04741g	CAGL0A04741g	8.60649	8.55497	8.5938	8.29335	8.44893	8.43161
CAGL0H01221g	CAGL0H01221g	6.47725	6.35067	6.70122	6.17426	6.44901	6.50537
CAGL0K10406g	CAGL0K10406g	5.61418	5.51685	5.53568	5.23386	5.55089	5.5234
CAGL0E04312g	CAGL0E04312g	7.50801	7.48888	8.2152	7.65121	8.35356	8.51276
CAGL0K08866g	CAGL0K08866g	7.76515	7.69661	8.08394	7.61809	7.8942	7.81332
CAGL0E04268g	CAGL0E04268g	4.53015	4.55331	4.48134	4.24466	4.27823	4.42731
CAGL0L11814g	CAGL0L11814g	6.91104	7.06331	7.13066	6.86362	7.02019	7.09481
CAGL0I04906g	CAGL0I04906g	7.95214	7.9596	8.12163	7.6259	8.07549	7.86618
CAGL0L12056g	BMH1%28A%29	9.28133	9.39714	9.23255	9.11657	9.60938	9.33665
CAGL0L10780g	CAGL0L10780g	10.1201	10.1697	10.0671	9.69754	10.1878	9.99978
CAGL0E02805g	CAGL0E02805g	5.42382	5.46933	5.54913	5.07846	5.26709	5.38341
CAGL0L05280g	CAGL0L05280g	4.28288	4.47528	4.1916	4.34113	4.2209	4.59335
CAGL0B02992g	MNT3	6.95596	7.01039	7.46298	7.52783	7.64094	8.05953
CAGL0J07942g	CAGL0J07942g	6.25834	6.32404	6.5017	6.12994	6.05523	6.18349
CAGL0C02827g	CAGL0C02827g	6.50208	6.45057	6.8766	7.07503	7.68269	7.40157
CAGL0F04367g	CAGL0F04367g	6.69358	6.55921	6.81488	6.48324	6.53762	6.59639
CAGL0C05357g	HST1	5.97255	5.95023	6.08678	5.81323	5.75041	5.76942
CAGL0I10626g	CAGL0I10626g	6.67484	6.66741	6.59139	7.06634	6.5562	6.55429
CAGL0H03817g	CAGL0H03817g	6.93538	6.93703	7.14628	6.6374	7.11269	6.97007
CAGL0K05665g	CAGL0K05665g	6.15622	6.12792	7.27279	6.73619	6.67362	6.87051
CAGL0M12276g	CAGL0M12276g	4.74956	4.82112	4.9201	4.66068	4.94043	4.95186
CAGL0M05027g	CAGL0M05027g	7.40092	7.36308	7.32672	6.98011	7.30292	7.30498
CAGL0I07601g	CAGL0I07601g	4.97766	4.81878	5.02743	4.91353	5.04528	5.36492
CAGL0J10934g	CAGL0J10934g	5.92578	5.91366	5.82525	5.56248	5.76088	5.83864
CAGL0I10494g	CAGL0I10494g	8.6048	8.65011	9.39851	9.66915	8.91178	9.25195
CAGL0H08932g	CAGL0H08932g	8.7309	8.68927	8.75437	8.43899	8.49631	8.5925
CAGL0I06853g	CAGL0I06853g	5.70655	5.61392	5.57531	5.46635	5.59139	5.55498
CAGL0K01507g	CAGL0K01507g	4.21187	4.31792	4.39541	4.31528	4.05422	4.39354
CAGL0L06710g	CAGL0L06710g	3.85818	3.94252	3.7862	3.56365	3.72823	4.00974
CAGL0L03410g	CAGL0L03410g	4.68486	4.73494	4.58471	4.32272	4.74038	4.84972
CAGL0D02486g	CAGL0D02486g	5.5672	5.49504	5.61059	5.46384	5.68492	5.9655
CAGL0A04147g	PEX13	3.77148	3.81785	3.98494	3.91783	3.8968	3.97591
CAGL0I00660g	CAGL0I00660g	5.59836	5.64435	5.91452	5.3003	5.57567	5.65165
CAGL0I05280g	CAGL0I05280g	5.87552	5.94831	6.1799	5.83158	6.05361	6.01353
CAGL0J06996g	CAGL0J06996g	5.65586	5.71169	5.85276	5.34934	5.54514	5.58759
CAGL0M11374g	CAGL0M11374g	5.64145	5.761	5.55016	5.42509	5.38359	5.58725
CAGL0K11022g	CAGL0K11022g	5.99715	5.99752	6.21946	5.8384	6.15005	6.2051
CAGL0I09570g	CAGL0I09570g	5.48641	5.60824	5.09573	5.33011	5.4346	5.46363
CAGL0I02508g	CAGL0I02508g	4.0861	4.10258	4.88193	5.2309	4.80586	4.4439
CAGL0J04620g	CAGL0J04620g	5.70378	5.65487	5.92935	5.62355	5.94808	5.85
CAGL0J00913g	CAGL0J00913g	2.58738	2.79328	2.39693	2.45625	2.65957	2.73613
CAGL0M08404g	CAGL0M08404g	5.80375	5.86621	5.85248	5.78828	6.18859	6.04081
CAGL0D05764g	CAGL0D05764g	5.38285	5.26462	5.61649	5.25781	5.29514	5.56743
CAGL0A00869g	EST2	4.68798	4.69572	4.62823	4.38439	4.36508	4.74468
CAGL0M09515g	CAGL0M09515g	5.16699	5.18696	5.14832	4.69973	5.3407	5.09434
CAGL0I04400g	CAGL0I04400g	6.02799	5.93843	6.36552	6.08476	6.08529	6.24115
CAGL0C01991g	CAGL0C01991g	3.12527	3.03165	3.32662	3.2804	3.22379	3.33167
CAGL0M08976g	CAGL0M08976g	4.09176	3.98736	3.83204	4.02536	3.84152	4.16609
CAGL0M13695g	CAGL0M13695g	4.95816	4.99483	5.10556	4.66214	4.77423	4.86548
CAGL0M07139g	CAGL0M07139g	5.43277	5.48534	5.46252	5.02877	5.66701	5.46991
CAGL0A00495g	PMA1	12.458	12.5407	12.6058	12.5204	12.6927	12.6885
CAGL0E05896g	CAGL0E05896g	8.28514	8.29795	8.20739	7.8891	8.24476	8.05346
CAGL0M00924g	CAGL0M00924g	6.68033	6.79804	6.99895	6.61978	6.7295	6.89307
CAGL0G07931g	CAGL0G07931g	4.47995	4.67725	4.27196	4.1878	4.47391	4.53541
CAGL0H01353g	CAGL0H01353g	4.57598	4.81597	4.42786	4.6258	4.7439	4.73061
CAGL0I04752g	CAGL0I04752g	9.18191	9.1953	9.26532	8.86143	9.35784	9.34924
CAGL0L11330g	CAGL0L11330g	4.78494	4.77796	4.80586	4.5142	4.55634	4.55081
CAGL0L06050g	CAGL0L06050g	0.680487	0.696739	0.995053	0.695442	0.267787	0.683752
CAGL0A03949g	CAGL0A03949g	6.06467	6.1349	6.22763	5.80131	6.20821	6.18775
CAGL0K03333g	CAGL0K03333g	5.62626	5.53034	5.98139	5.38527	5.69431	5.6294
CAGL0A04719g	CAGL0A04719g	8.05727	8.01182	8.37794	8.01816	8.27923	8.19355
CAGL0L01485g	CAGL0L01485g	8.29084	8.26436	8.46716	7.92327	8.41181	8.21859
CAGL0I00528g	CAGL0I00528g	3.84372	3.8594	4.07539	3.69544	4.06472	3.99139
CAGL0K10758g	CAGL0K10758g	6.72503	6.68984	6.86618	6.45499	6.57369	6.55845
CAGL0J06556g	CAGL0J06556g	5.90877	5.913	6.02521	5.5866	5.6752	5.99727
CAGL0K06743g	YBP1	7.12757	7.02507	7.12261	6.71216	6.99529	7.01769
CAGL0J03124g	CAGL0J03124g	6.85111	6.80491	6.74501	6.45097	6.94076	6.97513
CAGL0K11341g	CAGL0K11341g	4.95039	4.90465	4.68741	4.70044	4.78794	4.90469
CAGL0F06721g	CAGL0F06721g	6.49747	6.45359	6.7846	6.63889	6.6408	6.64856
CAGL0A02277g	CAGL0A02277g	-6.48944	-6.77087	-6.48876	-6.28184	-6.74344	-6.466
CAGL0M00110g	CAGL0M00110g	-6.48944	-6.77087	-6.48876	-6.28184	-6.74344	-6.466
CaglfMp02	VAR1	-6.48944	-6.77087	-6.48876	-6.28184	-6.74344	-6.466
CAGL0F09273g	CAGL0F09273g	-6.48944	-6.77087	-6.48876	-6.28184	-6.74344	-6.466
CAGL0C03960g	CAGL0C03960g	-6.48944	-6.77087	-6.48876	-6.28184	-6.74344	-6.466
CAGL0B05093g	CAGL0B05093g	-6.48944	-6.77087	-6.48876	-6.28184	-6.74344	-6.466
CAGL0F03261g	CAGL0F03261g	-6.48944	-6.77087	-6.48876	-6.28184	-6.74344	-6.466
CAGL0I04378g	CAGL0I04378g	-6.48944	-6.77087	-6.48876	-6.28184	-6.74344	-6.466
CaglfMp08	ATP8	-6.48944	-6.77087	-6.48876	-6.28184	-6.74344	-6.466
CAGL0C03938g	CAGL0C03938g	-6.48944	-6.77087	-6.48876	-6.28184	-6.74344	-6.466
CAGL0A02255g	CAGL0A02255g	-6.48944	-6.77087	-6.48876	-6.28184	-6.74344	-6.466
CAGL0D06138g	HEM2	7.65753	7.70214	7.56253	7.22422	7.61857	7.5015
CAGL0L00935g	APQ12	4.53015	4.46455	4.86549	4.60157	4.45685	4.75257
CAGL0H10538g	CAGL0H10538g	4.68985	4.8309	4.75441	4.72799	4.91477	4.98933
CAGL0H03597g	CAGL0H03597g	7.15013	7.09545	7.21319	6.77158	7.00653	7.02071
CAGL0J07524g	CAGL0J07524g	6.58587	6.6256	6.91358	6.3728	6.67388	6.68756
CAGL0M01782g	CAGL0M01782g	7.32023	7.35333	7.73388	7.32965	7.4325	7.52233
CAGL0E02893g	CAGL0E02893g	4.53015	4.65172	4.69115	4.25538	4.39419	4.60815
CAGL0M06215g	CAGL0M06215g	5.59802	5.63852	5.47522	5.2205	5.48478	5.47908
CAGL0J07700g	CAGL0J07700g	3.81662	3.92784	4.79548	4.95597	3.96392	4.49328
CAGL0M05115g	CAGL0M05115g	3.81434	3.76635	4.90302	4.52793	4.29136	4.43939
CAGL0H01683g	CAGL0H01683g	5.21273	5.14688	5.06966	4.84293	5.03505	5.23141
CAGL0L07238g	CAGL0L07238g	7.61614	7.62199	7.94639	7.48252	7.85287	7.69017
CAGL0J09878g	CAGL0J09878g	5.29069	5.37188	5.63148	5.23976	5.37615	5.51307
CAGL0I10406g	CAGL0I10406g	7.57134	7.4957	7.89568	7.55441	7.7722	7.7346
CAGL0M00968g	CAGL0M00968g	2.37475	2.40655	2.77098	3.07571	3.33471	3.68248
CAGL0L00363g	CAGL0L00363g	5.33114	5.22561	5.16587	5.12117	5.08549	5.27631
CAGL0G09251g	CAGL0G09251g	3.77383	3.77023	3.64695	3.86409	3.93955	4.17063
CAGL0J03245g	CAGL0J03245g	5.23806	5.18769	5.30849	4.93066	5.08589	5.03385
CAGL0L02255g	CAGL0L02255g	5.56041	5.56173	5.6447	5.24954	5.42147	5.31085
CAGL0K03883g	CAGL0K03883g	1.81434	1.72898	2.07729	1.61903	1.66595	1.90904
CAGL0F08481g	CAGL0F08481g	5.93709	5.95918	5.48852	5.95776	5.71368	5.86492
CAGL0K04433g	CAGL0K04433g	5.68143	5.65932	5.72343	5.16628	5.53152	5.73949
CAGL0L02651g	CAGL0L02651g	5.9342	5.9545	5.97169	5.51582	5.78428	5.77301
CAGL0J06292g	CAGL0J06292g	3.78202	3.6364	3.51686	3.62955	3.58636	3.75317
CAGL0E01551g	CAGL0E01551g	4.19969	4.28238	4.54052	4.08885	4.29067	4.36214
CAGL0F01837g	CAGL0F01837g	4.59005	4.63001	4.41738	4.45372	4.31861	4.42123
CAGL0K11550g	CAGL0K11550g	5.65363	5.57149	5.66225	5.23189	5.4374	5.59301
CAGL0I02486g	ENO1	13.0795	13.114	12.9233	12.9862	13.4667	13.1978
CAGL0C01309g	CAGL0C01309g	4.18475	4.44709	3.97272	4.25052	4.04119	4.29056
CAGL0M10307g	CAGL0M10307g	6.14265	6.16816	5.8497	6.00732	5.90514	6.24093
CAGL0I00264g	CAGL0I00264g	4.65267	4.66063	4.86107	4.51501	4.27337	4.59605
CAGL0J01089g	CAGL0J01089g	4.2837	4.21711	4.05427	3.96371	4.21729	4.17606
CAGL0F06039g	CAGL0F06039g	6.26962	6.1689	6.00209	6.02849	6.1627	6.34397
CAGL0G08888g	CAGL0G08888g	5.20361	5.08983	5.33421	4.85387	5.07394	5.13624
CAGL0J05588g	CAGL0J05588g	3.26043	3.34937	3.71703	3.28802	3.20784	3.09434
CAGL0L06028g	CAGL0L06028g	6.7909	6.82346	7.9314	7.40258	7.44939	7.42056
CAGL0C03674g	CAGL0C03674g	4.64049	4.63214	4.55836	4.44097	4.1873	4.58996
CAGL0E04686g	CAGL0E04686g	6.44867	6.42266	6.85331	6.45139	6.58453	6.67404
CAGL0C03333g	CAGL0C03333g	5.68736	5.63348	6.61453	5.91814	6.8468	6.42977
CAGL0L01991g	CAGL0L01991g	5.96255	5.98444	6.25207	5.73044	5.91231	6.16518
CAGL0K04565g	CAGL0K04565g	3.27045	3.26118	3.68367	3.40816	3.33338	3.4439
CAGL0I05830g	VPS27	6.85333	6.73965	7.18278	6.61279	6.80249	6.91663
CAGL0B04037g	CAGL0B04037g	5.42942	5.42358	5.81559	5.6243	5.41517	5.6261
CAGL0G09999g	CAGL0G09999g	5.04097	5.0529	5.58337	5.08612	5.06109	5.21919
CAGL0F03795g	CAGL0F03795g	5.71544	5.5798	5.95858	5.57264	5.7262	5.98109
CAGL0G09493g	CAGL0G09493g	5.05408	5.01295	4.84271	4.64372	5.00601	5.14134
CAGL0M00462g	CAGL0M00462g	5.89804	5.8309	6.26738	5.82832	5.70674	5.99881
CAGL0J02794g	CAGL0J02794g	3.45601	3.54202	3.18896	3.32179	3.46723	3.15606
CAGL0M12573g	CAGL0M12573g	3.51197	3.54202	3.63794	3.66507	3.64673	3.86716
CAGL0I08789g	CAGL0I08789g	4.74358	4.64117	4.65015	4.32826	4.66701	4.63138
CAGL0I03740g	CAGL0I03740g	5.75344	5.85598	5.84411	5.90644	5.91142	6.05118
CAGL0B02629g	CAGL0B02629g	6.56109	6.58366	6.85914	6.55362	6.77177	6.82647
CAGL0H09240g	CAGL0H09240g	4.60134	4.63905	5.22075	4.60386	4.546	4.69072
CAGL0K02343g	CAGL0K02343g	5.23508	5.41834	5.38814	4.95537	5.1672	5.11426
CAGL0M03047g	CAGL0M03047g	6.12412	6.14333	6.18962	5.56365	6.21312	6.19467
CAGL0L12936g	CAGL0L12936g	7.9399	7.97386	7.92685	7.51501	7.79208	7.75348
CAGL0H09768g	CAGL0H09768g	7.11778	7.07129	7.14639	6.61317	7.16786	6.94101
CAGL0H05423g	CAGL0H05423g	3.50633	3.59982	3.5827	3.31249	3.69535	3.76042
CAGL0H08217g	CAGL0H08217g	2.52179	2.46754	2.42113	2.54153	2.11454	2.74832
CAGL0E01705g	CAGL0E01705g	5.80805	5.65067	5.507	5.7923	5.70209	6.03634
CAGL0I07161g	CAGL0I07161g	5.58336	5.56536	5.97374	5.50892	5.68623	5.80634
CAGL0J06886g	CAGL0J06886g	5.14809	5.05528	5.545	5.09211	4.93648	5.20023
CAGL0B01573g	MTQ2	4.30822	4.25219	4.00008	4.0265	4.16645	4.33086
CAGL0G07271g	CAGL0G07271g	8.28117	8.42723	9.66831	9.13156	8.79499	8.96899
CAGL0B04015g	CAGL0B04015g	6.37048	6.38253	6.49191	6.06024	6.09596	6.27673
CAGL0I04774g	CAGL0I04774g	7.95596	7.93665	8.06078	7.81348	8.17505	8.28262
CAGL0M01958g	CAGL0M01958g	5.79191	5.77964	6.02101	5.84583	5.90064	6.20178
CAGL0C04829g	CAGL0C04829g	4.26712	4.12016	4.3977	4.14233	4.49437	4.45287
CAGL0J09592g	CAGL0J09592g	1.49925	1.69266	2.02694	1.55105	1.46113	1.49401
CAGL0M11352g	CAGL0M11352g	6.62056	6.69661	7.00096	6.76119	6.77349	6.68882
CAGL0M00264g	CAGL0M00264g	4.90395	4.79994	4.51897	5.03896	4.81402	4.79903
CAGL0A04191g	CAGL0A04191g	3.73215	3.8521	4.08772	3.8397	3.91477	3.78549
CAGL0A02134g	CAGL0A02134g	5.89075	5.89979	6.94873	6.21851	6.67191	6.65019
CAGL0K12452g	CAGL0K12452g	5.11233	4.94166	5.36221	5.14966	5.21148	5.37518
CAGL0D01012g	CAGL0D01012g	5.95117	6.03104	6.11301	5.75708	5.69379	5.82402
CAGL0J08393g	CAGL0J08393g	4.94101	4.84752	4.94587	4.59007	4.58692	4.92364
CAGL0L03916g	CAGL0L03916g	5.60596	5.65487	5.74336	5.38793	5.78575	5.84263
CAGL0G01606g	CAGL0G01606g	5.96794	5.87299	5.7978	5.74779	5.63594	5.97228
CAGL0L01859g	NFU1	5.91411	5.82346	5.81331	5.72273	5.73331	5.65586
CAGL0A00935g	CAGL0A00935g	4.1918	4.18333	4.11857	4.03783	4.40948	4.56122
CAGL0M12749g	CAGL0M12749g	4.22909	4.19275	4.56448	4.38882	4.23741	4.51343
CAGL0L12034g	CAGL0L12034g	4.92683	5.10219	4.75084	4.50525	4.93999	4.96498
CAGL0B01859g	CAGL0B01859g	4.72062	4.69368	4.55904	4.25635	4.63269	4.8043
CAGL0I02112g	CAGL0I02112g	3.83587	3.75856	4.16408	3.92396	3.65209	3.98315
CAGL0M08162g	CAGL0M08162g	6.50615	6.40078	6.62498	6.40947	6.14758	6.35976
CAGL0J01727g	CAGL0J01727g	2.71023	2.94681	2.87537	2.82407	2.9094	2.82172
CAGL0F09207g	BAT1	8.84029	8.73677	9.10498	9.17916	8.78608	8.77521
CAGL0F07557g	CAGL0F07557g	2.00642	2.11788	1.96245	1.97083	1.72823	2.36373
CAGL0J09108g	CAGL0J09108g	7.4324	7.39537	7.73697	7.09075	7.36549	7.35598
CAGL0J05808g	CAGL0J05808g	3.88016	3.81878	4.27777	3.78828	4.13154	3.90469
CAGL0H01705g	CAGL0H01705g	7.78923	7.84545	8.13489	7.81372	8.02174	7.95751
CAGL0L13299g	EPA11	3.52179	3.62252	3.75917	3.7748	3.62288	3.65683
CAGL0I02684g	CAGL0I02684g	5.31267	5.2629	5.20994	6.33448	6.16232	6.15994
CAGL0I08811g	CAGL0I08811g	3.4907	3.6364	3.4928	3.59468	3.70054	3.85706
CAGL0M01892g	CAGL0M01892g	0.814342	0.736928	1.18366	1.04908	0.691188	0.837785
CAGL0M05709g	CAGL0M05709g	5.22609	5.20749	5.2186	4.99603	4.90985	4.9702
CAGL0F04741g	CAGL0F04741g	7.06659	7.09931	8.13506	7.39973	7.77097	7.89327
CAGL0E04180g	CAGL0E04180g	5.87141	5.88712	6.02989	5.61146	6.05584	6.08162
CAGL0E02145g	CAGL0E02145g	4.33313	4.26805	4.84439	4.32919	4.26008	4.50914
CAGL0I01650g	CAGL0I01650g	5.19268	5.24942	6.21881	5.97496	5.61356	5.78844
CAGL0K10296g	CAGL0K10296g	4.02725	3.98151	4.26529	3.64742	4.03628	4.18416
CAGL0J05434g	CAGL0J05434g	8.01115	7.96395	8.24224	8.23201	8.02862	8.32451
CAGL0F00693g	CAGL0F00693g	7.62316	7.58552	7.79092	7.72063	7.90968	7.86415
CAGL0H06523g	CAGL0H06523g	6.44111	6.4638	6.18719	6.11021	6.61878	6.48675
CAGL0M11396g	CAGL0M11396g	5.77383	5.91957	5.50453	5.50034	5.68962	5.71485
CAGL0K12298g	CAGL0K12298g	3.61122	3.45915	3.52944	3.29936	3.71599	3.79257
CAGL0H07491g	CAGL0H07491g	6.74658	6.69444	6.61371	7.00342	6.90143	6.98328
CAGL0H03839g	CAGL0H03839g	5.38554	5.56731	5.11162	5.19237	5.31489	5.27041
CAGL0F02783g	CAGL0F02783g	4.65011	4.64011	4.75857	4.44693	4.32467	4.46252
CAGL0J01774g	CAGL0J01774g	5.65522	5.71194	6.76005	6.26313	6.28878	6.2968
CAGL0L09185g	CAGL0L09185g	5.93341	5.93304	6.38449	6.07709	5.99529	6.11143
CAGL0H05907g	CAGL0H05907g	4.92048	4.97397	5.08725	5.25635	4.7962	5.07607
CAGL0M09295g	CAGL0M09295g	4.38938	4.37952	4.5672	4.60157	4.50449	4.71142
CAGL0K10604g	CAGL0K10604g	4.4376	4.43187	4.81045	5.0168	5.41612	5.53576
CAGL0H04631g	AP1	5.38439	5.51164	5.49957	5.52954	5.55032	5.67035
CAGL0K02761g	CAGL0K02761g	6.05818	6.18551	6.21428	5.97112	6.21112	6.37537
CAGL0K10120g	CAGL0K10120g	4.98427	4.91388	5.33381	5.10079	4.91745	5.22182
CAGL0M03575g	CAGL0M03575g	5.85264	5.76732	5.69921	5.70507	6.06029	6.09982
CAGL0M11506g	CAGL0M11506g	7.21684	7.13546	6.99039	6.7521	7.17375	7.24287
CAGL0I06457g	CAGL0I06457g	4.88831	4.78564	5.24975	5.03727	5.08112	4.92417
CAGL0C03311g	CAGL0C03311g	2.96794	2.85301	3.53083	2.97555	2.98957	3.10386
CAGL0M02057g	CAGL0M02057g	5.51162	5.48505	5.4799	5.18424	5.21257	5.35179
CAGL0M03531g	CAGL0M03531g	8.97804	8.93884	9.10349	8.66402	8.77075	8.81937
CAGL0B01287g	BUD5	3.40235	3.8466	3.49423	3.22991	3.30232	3.36531
CAGL0H00264g	CAGL0H00264g	4.27128	4.15097	4.20385	3.98962	4.13538	4.512
CAGL0C00968g	CAGL0C00968g	4.45234	4.65015	4.51616	4.92273	4.35393	4.46843
CAGL0K06083g	CAGL0K06083g	4.44278	4.15097	4.66922	4.43841	4.22162	4.33814
CAGL0J11462g	CAGL0J11462g	9.50224	9.48829	9.55307	9.21863	9.7889	9.71789
CAGL0K08140g	CAGL0K08140g	5.48713	5.49152	5.87947	5.50075	5.69509	5.71981
CAGL0B00440g	CAGL0B00440g	7.97523	7.9224	7.9738	7.78753	7.75048	7.59056
CAGL0J05346g	CAGL0J05346g	6.7772	6.78132	6.9065	6.51136	7.02164	6.98534
CAGL0M13607g	CAGL0M13607g	3.25034	3.03649	3.33301	3.55421	3.08311	3.3349
CAGL0C01133g	CAGL0C01133g	5.3387	5.54457	5.40264	5.82571	5.29514	5.39082
CAGL0K12672g	CAGL0K12672g	7.99853	7.86717	7.93389	7.64918	7.77975	7.90898
CAGL0I09636g	CAGL0I09636g	3.82004	3.83646	4.07824	4.10402	3.81976	4.11521
CAGL0G03135g	CAGL0G03135g	3.94519	3.8989	3.58002	3.80031	4.02143	4.16791
CAGL0E04664g	CAGL0E04664g	6.07042	6.01683	6.1248	5.7072	5.88955	5.86632
CAGL0G05159g	CAGL0G05159g	4.23252	4.24315	4.48062	4.02194	4.02309	4.05266
CAGL0I10362g	PWP4	2.49356	2.87118	2.65844	2.6489	2.3729	2.534
CAGL0M10351g	CAGL0M10351g	6.33671	6.30294	6.75173	6.32757	6.49944	6.57549
CAGL0K03619g	CAGL0K03619g	4.10302	3.90773	3.97986	3.95537	3.76237	4.15606
CAGL0H02035g	CAGL0H02035g	3.3993	3.52375	3.54741	3.38527	3.57961	3.79257
CAGL0G00330g	CAGL0G00330g	3.08799	3.02841	2.7639	2.92029	2.84715	3.15606
CAGL0B03971g	CAGL0B03971g	5.81605	6.0395	6.22934	5.86091	5.92611	5.88467
CAGL0F01991g	CAGL0F01991g	4.57193	4.54202	4.92592	4.48965	4.28101	4.4677
CAGL0M10505g	CAGL0M10505g	4.25203	4.16061	4.02595	3.85899	4.11842	4.26956
CAGL0M05247g	CAGL0M05247g	5.40689	5.32552	5.67866	5.48428	5.56234	5.68312
CAGL0L05346g	CAGL0L05346g	2.65522	2.86394	3.22548	3.97083	3.12846	3.58113
CAGL0K12342g	CAGL0K12342g	7.35693	7.30712	7.56134	7.13957	7.5832	7.52225
CAGL0I07205g	CAGL0I07205g	6.34068	6.29976	6.66162	6.32849	6.59195	6.57874
CAGL0F05203g	RIB7	3.89427	3.85758	3.71825	3.5808	3.72925	3.71888
CAGL0G07821g	CAGL0G07821g	4.11326	4.10181	4.18366	4.36382	4.33804	4.42275
CAGL0D01804g	CAGL0D01804g	6.61941	6.49694	6.91625	6.416	6.38149	6.62627
CAGL0F06831g	CAGL0F06831g	7.32043	7.43279	7.21644	6.98246	7.13911	7.18763
CAGL0F04125g	CAGL0F04125g	4.71697	4.9261	5.32341	6.59736	5.68753	5.68025
CAGL0D01738g	CAGL0D01738g	6.49551	6.46948	6.70553	6.26602	6.70429	6.6904
CAGL0B04191g	CAGL0B04191g	6.93958	7.01846	6.63002	6.69455	6.80502	6.8365
CAGL0L03091g	CAGL0L03091g	6.82769	6.85644	7.31214	7.03218	6.80454	6.95883
CAGL0A03542g	COX12	8.42695	8.4023	8.69227	8.65907	8.53686	8.66719
CAGL0I09130g	CAGL0I09130g	4.91091	4.94938	5.9246	5.66543	5.36247	5.55325
CAGL0K08404g	CAGL0K08404g	6.24485	6.20802	6.59986	6.39081	6.3407	6.48456
CAGL0F05247g	CAGL0F05247g	5.49925	5.36292	5.23831	5.09862	5.42366	5.50051
CAGL0D01628g	CAGL0D01628g	4.05263	3.88824	3.91957	3.70827	3.88683	3.98522
CAGL0F05555g	CAGL0F05555g	3.5357	3.4483	3.57193	3.59621	3.7262	4.03783
CAGL0G07755g	CAGL0G07755g	2.75849	2.79709	2.96862	2.7923	2.8434	3.26871
CAGL0M03641g	CAGL0M03641g	4.71941	4.7527	4.55972	4.46047	4.47209	4.54033
CAGL0K09526g	CAGL0K09526g	7.74246	7.75728	8.08269	7.60614	8.01754	7.85452
CAGL0D06226g	CAGL0D06226g	4.8856	4.82159	5.35555	4.75159	4.92766	5.05511
CAGL0C05577g	CAGL0C05577g	0.343452	0.514535	0.5987	0.075714	0.406307	0.220505
CAGL0G07997g	CAGL0G07997g	6.08302	6.15784	5.97706	6.19668	5.97381	6.55932
CAGL0M09185g	CAGL0M09185g	6.61843	6.55823	6.76863	6.63963	6.9557	6.93195
CAGL0D05324g	CAGL0D05324g	5.18564	5.04412	5.44751	5.38216	5.05786	5.34055
CAGL0M05511g	CAGL0M05511g	6.81691	6.78576	7.13752	6.87203	7.06733	7.04242
CAGL0M05599g	CAGL0M05599g	7.24622	7.49255	6.83331	7.14848	7.34004	7.21403
CAGL0K06325g	CAGL0K06325g	6.70224	6.70512	7.04335	7.03458	6.6086	6.81622
CAGL0K05335g	CAGL0K05335g	6.74732	6.73532	6.67127	6.47888	6.43895	6.52712
CAGL0M04015g	CAGL0M04015g	2.58738	2.58007	2.82865	2.74883	2.73027	2.91987
CAGL0M03927g	CAGL0M03927g	4.48426	4.52605	4.26445	4.16937	4.64888	4.62874
CAGL0J11814g	CAGL0J11814g	3.6308	3.6364	3.68616	3.89184	3.82261	4.00263
CAGL0M09735g	MEC3	3.78436	3.93131	4.03578	3.69973	3.98703	3.98522
CAGL0E02387g	CAGL0E02387g	4.84316	4.76635	4.84327	4.43069	4.64619	4.64253
CAGL0J02618g	CAGL0J02618g	3.90502	3.80373	4.27694	3.91045	4.01645	4.202
CAGL0H04697g	CAGL0H04697g	6.3066	6.44178	6.01705	6.16912	6.08767	6.19912
CAGL0C00847g	EPA8	3.88343	4.04851	4.25355	4.14443	3.80056	3.87385
CAGL0L05082g	CAGL0L05082g	8.48833	8.38261	8.38324	8.06065	8.25951	8.46668
CAGL0D05632g	CAGL0D05632g	2.89858	2.96723	2.81958	3.11904	3.10831	3.20996
CAGL0D06446g	CAGL0D06446g	6.96897	7.0703	6.86356	6.45562	7.00328	6.8325
CAGL0F01617g	CAGL0F01617g	6.12113	6.07089	6.44843	6.25344	6.28343	6.34096
CAGL0M13409g	CAGL0M13409g	5.80317	5.90288	5.70322	5.4718	5.61384	5.63138
CAGL0E00693g	CAGL0E00693g	4.36231	4.3006	4.16229	4.15799	4.14302	4.15422
CAGL0J01507g	CAGL0J01507g	6.47111	6.42758	6.53343	6.49336	6.76757	6.94034
CAGL0F01507g	CAGL0F01507g	6.15442	6.31726	5.98748	5.93551	6.26744	6.38731
CAGL0E03454g	IMH1	6.25666	6.28408	6.51686	6.02394	6.04854	6.42503
CAGL0I04686g	CAGL0I04686g	9.11477	9.12655	9.34482	9.20355	9.3594	9.43657
CAGL0I04466g	CAGL0I04466g	5.64627	5.61473	5.43419	5.20851	5.58074	5.79727
CAGL0K07854g	CAGL0K07854g	3.99337	3.93304	3.77451	3.69401	3.67441	3.99241
CAGL0F06545g	CAGL0F06545g	3.38554	3.51685	3.67866	3.51744	3.50686	3.60815
CAGL0I07183g	CAGL0I07183g	6.27564	6.24507	5.91238	5.81488	6.24649	6.29244
CAGL0I02662g	YKU70	5.38746	5.26565	5.5277	5.12755	5.1702	5.22575
CAGL0F07271g	CAGL0F07271g	4.82117	4.86213	4.77392	4.45287	4.61686	5.06246
CAGL0M08360g	CAGL0M08360g	6.32113	6.41013	6.7468	6.32595	6.47164	6.55377
CAGL0D03212g	CAGL0D03212g	6.33273	6.21924	6.21579	6.0076	6.13978	6.17854
CAGL0L00979g	CAGL0L00979g	7.70178	7.67246	7.84362	7.40816	7.42437	7.54086
CAGL0B00396g	CAGL0B00396g	7.30142	7.34141	7.57472	7.42735	7.55297	7.51388
CAGL0C02717g	CAGL0C02717g	4.31953	4.38142	4.42038	4.33011	4.60695	4.76282
CAGL0B03377g	CAGL0B03377g	5.51021	5.5128	5.54052	5.10133	5.20675	5.35139
CAGL0K12870g	CAGL0K12870g	4.55154	4.42881	4.80068	4.11048	4.51983	4.49038
CAGL0K08998g	CAGL0K08998g	4.85486	4.86666	4.75976	4.51825	5.12769	5.04477
CAGL0D03740g	CAGL0D03740g	5.82514	5.79875	5.50912	5.30781	5.8692	5.81883
CAGL0M08932g	CAGL0M08932g	4.00342	4.12622	4.28108	4.16007	4.2042	4.15606
CAGL0H04587g	CAGL0H04587g	5.76913	5.7866	5.66352	5.33701	5.48147	5.70111
CAGL0G04191g	CAGL0G04191g	2.81662	2.7468	2.56652	2.61903	2.65316	2.58657
CAGL0H03443g	CAGL0H03443g	5.49284	5.49064	5.61649	5.58737	5.84691	5.83235
CAGL0L11572g	CAGL0L11572g	6.15171	6.20945	6.02595	5.68863	5.99655	6.03907
CAGL0G03421g	FLO8	5.4031	5.44649	5.67142	5.47263	5.67177	5.66779
CAGL0E02167g	CAGL0E02167g	6.4948	6.44921	6.63665	5.96876	6.381	6.40706
CAGL0K10098g	CAGL0K10098g	3.22309	3.15987	3.15148	2.77886	2.99971	3.10954
CAGL0H07095g	CAGL0H07095g	6.62137	6.58324	7.10894	6.8625	6.58664	6.73705
CAGL0L02035g	CAGL0L02035g	7.85756	7.8549	7.78867	8.06447	8.0891	8.26522
CAGL0L10956g	CAGL0L10956g	4.43537	4.39655	4.04846	4.15695	4.39227	4.60748
CAGL0M11968g	CAGL0M11968g	6.47995	6.43828	6.31295	5.9163	6.36476	6.44802
CAGL0F02365g	CAGL0F02365g	3.5847	3.63001	3.88301	3.64594	3.86574	3.82287
CAGL0L08030g	CAGL0L08030g	5.34068	5.40811	5.42712	4.90304	5.14796	5.20067
CAGL0H03553g	CAGL0H03553g	6.46984	6.54937	6.21363	6.0502	6.40979	6.57874
CAGL0M05577g	CAGL0M05577g	4.13078	4.09022	4.28438	3.62955	4.07434	3.95817
CAGL0L00715g	CAGL0L00715g	7.12251	7.16724	7.05572	6.777	6.85345	6.92404
CAGL0C02167g	CAGL0C02167g	5.73094	5.81198	5.93041	5.79398	5.89545	6.14779
CAGL0L09735g	CAGL0L09735g	5.35291	5.21888	5.67174	5.47971	5.48988	5.56122
CAGL0G02695g	CAGL0G02695g	4.15982	4.2817	3.8917	3.94578	3.85926	4.13948
CAGL0M10483g	CAGL0M10483g	4.73577	4.79661	5.04408	4.92701	4.83823	4.99906
CAGL0B00704g	PDI1	10.2176	10.2379	9.98767	9.63381	10.2277	10.1354
CAGL0E03608g	CAGL0E03608g	4.34898	4.16209	4.59936	4.48303	4.45008	4.60345
CAGL0D04950g	CAGL0D04950g	6.59637	6.58957	6.37116	6.2262	6.49018	6.37753
CAGL0B01529g	PEX7	4.63339	4.64223	4.80356	4.73497	4.97081	4.94286
CAGL0E02321g	CAGL0E02321g	6.62918	6.75881	6.32	6.56424	6.76473	6.91811
CAGL0I01188g	CAGL0I01188g	7.11835	7.06123	7.0241	6.51542	6.99053	7.16473
CAGL0B02321g	CAGL0B02321g	8.42695	8.42123	8.36401	7.79623	8.40635	8.21689
CAGL0K03069g	CAGL0K03069g	4.00642	4.01785	3.84774	3.79364	4.27545	4.28555
CAGL0K03971g	CAGL0K03971g	6.39206	6.31925	6.47196	5.94307	6.25937	6.19534
CAGL0K03245g	CAGL0K03245g	5.60662	5.5662	6.67426	6.34638	6.12943	6.30302
CAGL0F02123g	CAGL0F02123g	8.00429	7.93714	7.99952	7.68872	7.75697	7.70721
CAGL0I06787g	CAGL0I06787g	6.33512	6.31875	6.68725	6.00933	6.42821	6.18931
CAGL0K05995g	CAGL0K05995g	6.91942	6.91202	6.77685	6.35025	6.89318	6.73137
CAGL0H04741g	CAGL0H04741g	8.52876	8.4403	8.3605	7.97363	8.49018	8.44572
CAGL0C03399g	CAGL0C03399g	6.26211	6.29925	6.15013	5.82832	6.10538	6.06733
CAGL0H07447g	CAGL0H07447g	4.72123	4.70385	4.56313	4.37637	4.45255	4.86772
CAGL0M12859g	CAGL0M12859g	8.34814	8.41133	8.77729	8.3461	8.66622	8.47289
CAGL0I09526g	CAGL0I09526g	4.211	4.30194	4.34413	3.93127	3.9955	3.99241
CAGL0M09889g	CAGL0M09889g	6.74088	6.72149	6.66811	6.25829	6.47573	6.64269
CAGL0F05225g	CAGL0F05225g	2.24188	2.37634	2.66606	2.18577	2.31726	2.49111
CAGL0K02101g	CAGL0K02101g	4.46694	4.56396	4.54535	4.17657	4.72264	4.68566
CAGL0I04796g	CAGL0I04796g	4.8747	5.01336	5.19774	4.91906	5.06391	5.11991
CAGL0M08778g	CAGL0M08778g	2.20753	2.07148	3.53083	2.84487	2.76633	3.13948
CAGL0A03883g	CAGL0A03883g	4.02921	4.21426	3.66479	3.71393	3.99634	3.98522
CAGL0K06721g	CAGL0K06721g	4.24696	4.25081	4.51405	4.43926	4.36639	4.60614
CAGL0I08987g	CAGL0I08987g	3.47056	3.58007	3.48995	3.65038	3.80827	3.76643
CAGL0K10054g	CAGL0K10054g	6.11233	6.13584	5.83935	5.65111	6.00391	6.03609
CAGL0H05049g	CAGL0H05049g	5.13627	5.09757	5.02595	4.70968	4.92766	4.97798
CAGL0I10246g	PWP2	2.75135	2.63852	2.83317	2.26506	2.54658	2.69388
CAGL0E05412g	CAGL0E05412g	6.87675	7.01877	7.01978	6.99283	7.21185	7.08415
CAGL0F08569g	CAGL0F08569g	5.09974	5.1532	4.9819	4.79029	4.80971	4.92579
CAGL0D00242g	CAGL0D00242g	6.02872	5.98569	6.41437	6.13812	6.19871	6.26596
CAGL0G01122g	CAGL0G01122g	2.20056	2.29253	2.51405	2.36202	2.52802	2.25168
CAGL0M07001g	CAGL0M07001g	3.35762	3.28442	3.82071	3.45118	3.46235	3.5688
CAGL0M03333g	CAGL0M03333g	6.55854	6.51106	6.98177	6.67816	6.70209	6.77047
CAGL0J02992g	CAGL0J02992g	6.48533	6.38711	6.3358	6.13996	6.25021	6.36769
CAGL0E03003g	CAGL0E03003g	4.43537	4.49123	5.06535	4.55815	4.34932	4.48675
CAGL0K01177g	CAGL0K01177g	4.5433	4.46574	4.87701	4.59851	4.74941	4.81709
CAGL0G00550g	CAGL0G00550g	5.07662	5.02477	5.27777	5.42595	5.26988	5.22749
CAGL0E00561g	CAGL0E00561g	6.33532	6.31427	6.20842	6.04375	6.07754	6.08571
CAGL0H08866g	CAGL0H08866g	4.7573	4.81457	4.66035	4.46803	4.4044	4.60547
CAGL0I01078g	PFY1	8.17295	8.21088	8.52076	8.28481	8.45416	8.34322
CAGL0G06754g	CAGL0G06754g	7.77581	7.76471	7.67079	7.24869	7.58544	7.65853
CAGL0K02167g	CAGL0K02167g	5.04778	5.21497	4.92539	4.7646	4.81211	4.90469
CAGL0G04103g	CAGL0G04103g	5.74508	5.68523	5.66162	5.42681	5.39835	5.60178
CAGL0G09757g	CAGL0G09757g	5.80116	5.7794	6.21384	5.95955	5.94284	6.01832
CAGL0H09548g	CAGL0H09548g	7.4907	7.46485	7.48923	6.90814	7.42311	7.21502
CAGL0H00484g	CAGL0H00484g	5.8189	5.7782	6.1151	5.64594	6.05442	6.02686
CAGL0D03784g	CAGL0D03784g	3.35134	3.34027	3.28438	2.94457	3.2281	3.00568
CAGL0H04345g	CAGL0H04345g	4.99438	4.94252	5.13192	4.56991	4.85042	4.79845
CAGL0E04796g	CAGL0E04796g	6.22438	6.22949	6.56448	6.13179	6.34187	6.62362
CAGL0B04499g	CAGL0B04499g	7.26691	7.21906	7.24245	6.8884	7.07893	6.95107
CAGL0L03223g	CAGL0L03223g	3.60067	3.49475	3.43902	3.42379	3.21221	3.47798
CAGL0K05423g	CAGL0K05423g	5.17989	5.11407	5.47558	5.22596	5.43554	5.47248
CAGL0E02849g	CAGL0E02849g	7.08716	7.0801	7.42674	6.77869	6.94492	6.9278
CAGL0K00979g	CAGL0K00979g	6.32474	6.35729	6.18697	6.00443	6.09044	6.0929
CAGL0A02948g	CAGL0A02948g	5.42457	5.3539	5.33381	4.91722	5.29548	5.26447
CAGL0I05676g	CAGL0I05676g	2.97817	2.66792	3.15329	2.90551	2.99465	3.36214
CAGL0G06138g	CAGL0G06138g	7.00567	7.03729	7.09185	6.88307	7.46319	7.26713
CAGL0D01606g	CAGL0D01606g	6.21078	6.19744	6.1578	5.5231	6.21783	6.01176
CAGL0F07337g	CAGL0F07337g	5.33552	5.42358	5.76449	5.27419	5.03546	5.25211
CAGL0A04367g	CAGL0A04367g	3.30335	3.49709	3.21687	3.08667	2.96564	3.17606
CAGL0I08261g	CAGL0I08261g	5.42719	5.43064	5.2852	5.14861	5.03956	5.27673
CAGL0C01155g	CAGL0C01155g	5.00442	5.01131	5.60993	5.11316	5.07674	5.17335
CAGL0L03432g	CAGL0L03432g	6.64531	6.59791	6.67394	6.19592	6.39771	6.45566
CAGL0L04466g	CAGL0L04466g	7.5139	7.43018	7.91092	7.63805	7.58222	7.80357
CAGL0H00308g	CAGL0H00308g	5.81833	5.77603	5.89089	5.63292	5.37842	5.592
CAGL0G04455g	CAGL0G04455g	0.83249	0.704866	2.37852	1.66068	1.41643	1.80547
CAGL0L08052g	CAGL0L08052g	6.7518	6.78947	6.77319	6.38727	6.50597	6.45324
CAGL0L02805g	CAGL0L02805g	7.50208	7.69438	7.31052	7.4948	7.20939	7.21755
CAGL0H10626g	CAGL0H10626g	-1.789	-1.24731	-1.35948	-0.889521	-1.15848	-0.256542
CAGL0G00506g	CAGL0G00506g	5.86591	5.979	5.74875	5.68142	5.54514	5.63237
CAGL0J05159g	CAGL0J05159g	3.13444	3.2598	3.26111	3.463	3.39994	3.25852
CAGL0M11990g	CAGL0M11990g	8.12498	8.12783	7.88811	7.64687	8.34907	8.09577
CAGL0J02090g	CAGL0J02090g	5.34543	5.26152	5.22548	4.9726	5.14948	5.14641
CAGL0M08646g	CAGL0M08646g	4.87031	4.81785	5.32101	4.94035	4.92899	5.21084
CAGL0M10065g	CAGL0M10065g	3.86921	3.79614	4.09526	3.82276	4.23813	4.1274
CAGL0F06215g	CAGL0F06215g	5.50385	5.48652	5.53395	5.05244	5.17914	5.35458
CAGL0A03630g	CAGL0A03630g	5.49356	5.51685	5.44898	4.99137	5.2855	5.29763
CAGL0K01661g	CAGL0K01661g	5.93236	5.90927	5.71428	5.98495	5.60971	5.57464
CAGL0G05203g	CAGL0G05203g	4.3732	4.45434	4.10089	4.02764	4.20784	4.26278
CAGL0F05665g	CAGL0F05665g	7.38083	7.37443	7.49459	7.11463	7.05796	7.11473
CAGL0B01589g	CAGL0B01589g	4.52528	4.61338	4.90355	4.82014	4.59251	4.67228
CAGL0J01800g	CAGL0J01800g	4.50279	4.6252	4.86714	4.63926	4.61246	4.7465
CAGL0M07381g	CAGL0M07381g	7.47842	7.43958	8.72658	8.29712	8.08008	8.24519
CAGL0H08239g	CAGL0H08239g	4.97613	5.04652	4.94378	4.63628	4.61026	4.80547
CAGL0H06149g	CAGL0H06149g	6.68158	6.80762	6.50895	6.35886	6.49362	6.51093
CAGL0D02068g	CAGL0D02068g	7.07161	7.08673	7.01457	6.60671	6.88284	6.81724
CAGL0H04829g	CAGL0H04829g	2.3993	2.47943	3.63665	3.11904	3.0081	3.2082
CAGL0J03300g	CAGL0J03300g	4.96589	5.0203	4.75798	5.31249	5.20748	5.09577
CAGL0F01771g	CAGL0F01771g	5.22309	5.31161	5.25228	4.80031	4.88865	5.11756
CAGL0A01452g	CAGL0A01452g	6.1821	6.29841	5.82412	5.85098	6.06532	6.12342
CAGL0H03355g	CAGL0H03355g	4.32354	4.25842	4.5419	4.0812	4.04935	4.14226
CAGL0E00605g	CAGL0E00605g	2.55769	2.81785	2.64052	2.68971	2.98788	2.63467
CAGL0K06765g	CAGL0K06765g	3.62039	3.45675	3.55972	3.40291	3.70777	4.07413
CAGL0H06215g	GAL11A	7.02626	7.06272	7.30718	7.15526	7.16006	7.42901
CAGL0J01243g	CTF13	3.92207	3.75856	3.82525	3.52391	3.6435	3.96863
CAGL0L01155g	CAGL0L01155g	3.28864	3.1643	3.16766	2.91538	2.95179	3.26022
CAGL0E03894g	FPS2	3.21792	3.05409	3.35673	3.33838	3.29822	3.69891
CAGL0H02871g	CAGL0H02871g	5.58035	5.53177	5.44419	5.43155	5.83658	5.97617
CAGL0K07392g	CAGL0K07392g	8.43157	8.38944	8.28597	7.87132	8.6377	8.39959
CAGL0I10340g	PWP5	3.07852	3.24733	2.96451	3.16731	2.64888	2.89156
CAGL0L06468g	CAGL0L06468g	5.11465	5.0703	4.92856	4.76529	5.2548	5.38341
CAGL0K12386g	CAGL0K12386g	5.33034	5.4137	5.56584	5.3928	4.917	5.13578
CAGL0M05357g	CAGL0M05357g	6.08539	6.12622	6.11787	5.71322	5.74741	5.87747
CAGL0I03696g	CAGL0I03696g	4.08231	4.05489	5.21557	4.82014	4.74841	4.77599
CAGL0F08393g	CAGL0F08393g	6.7653	6.74766	6.70353	6.37503	6.4689	6.53945
CAGL0H10340g	CAGL0H10340g	2.57934	2.70891	2.87974	2.70116	2.62069	2.97902
CAGL0K08492g	CAGL0K08492g	7.55649	7.56843	7.6406	7.08967	7.34725	7.3343
CAGL0K02013g	CAGL0K02013g	3.3001	3.37888	3.0504	3.75159	3.29959	3.51414
CAGL0L02365g	CAGL0L02365g	8.40992	8.41428	8.29403	8.05878	8.17542	8.12114
CAGL0D02376g	CAGL0D02376g	5.3763	5.28915	5.28314	4.97555	5.11065	5.22749
CAGL0G02255g	CAGL0G02255g	5.88886	5.91651	6.12434	6.00933	6.25832	6.13229
CAGL0K04191g	CAGL0K04191g	5.15802	5.16908	5.36338	5.20449	5.51454	5.53576
CAGL0G04433g	CAGL0G04433g	6.49978	6.51425	6.28582	5.99108	6.64847	6.61199
CAGL0C03135g	CAGL0C03135g	5.82061	5.81574	5.63439	5.49829	5.43647	5.71981
CAGL0F03553g	CAGL0F03553g	6.41407	6.44558	6.78867	6.31179	6.61329	6.70737
CAGL0D01166g	CAGL0D01166g	3.61385	3.55556	3.37387	3.17964	3.39099	3.65942
CAGL0I04334g	CAGL0I04334g	5.65681	5.79018	5.95935	6.07351	5.56005	5.60413
CAGL0K13024g	AED1	-0.489438	-0.361476	-0.444368	-0.526951	-0.699046	-1.07368
CAGL0J01067g	CAGL0J01067g	4.68798	4.56564	4.26613	4.45963	4.49198	4.65035
CAGL0B04455g	CAGL0B04455g	1.69544	1.63427	1.87318	1.51258	1.45132	1.35418
CAGL0M08866g	PEX29	5.46803	5.45042	5.63826	5.68863	5.68623	5.84887
CAGL0J10340g	CAGL0J10340g	5.90529	5.88489	6.22097	5.83386	6.22703	6.18461
CAGL0M02937g	CAGL0M02937g	7.40026	7.47037	7.7659	7.44182	7.7541	7.57814
CAGL0A02530g	CAGL0A02530g	8.10518	8.09192	9.17393	9.03416	8.58246	8.76372
CAGL0M05313g	CAGL0M05313g	2.46185	2.37379	2.79433	2.24172	2.21946	2.3349
CAGL0L07282g	CAGL0L07282g	5.91011	5.82019	5.71917	5.58544	5.56005	5.85452
CAGL0K10142g	CAGL0K10142g	3.61909	3.5226	3.33779	3.42379	3.81594	3.86043
CAGL0K10494g	CAGL0K10494g	7.05504	6.94649	7.45951	6.95761	7.26131	7.24997
CAGL0D00748g	CAGL0D00748g	8.09957	8.12599	8.39536	8.36506	8.28222	8.34131
CAGL0D04510g	CAGL0D04510g	5.56449	5.56898	5.75382	5.6825	5.87747	5.95238
CAGL0L04422g	CAGL0L04422g	5.83362	5.72049	6.3461	6.06384	5.69119	5.81912
CAGL0F03619g	CAGL0F03619g	3.42045	3.27489	3.35359	3.74607	3.10987	3.58521
CAGL0C05423g	CAGL0C05423g	4.9061	4.81644	5.2451	5.11048	5.02722	5.16564
CAGL0B02585g	CAGL0B02585g	9.3003	9.37703	8.7332	8.96865	9.33287	9.30691
CAGL0K12606g	CAGL0K12606g	5.82401	5.83762	5.79462	5.24662	5.61521	5.63729
CAGL0J09504g	MET12	6.71299	6.66974	6.71749	6.36314	6.3802	6.42712
CAGL0I00308g	CAGL0I00308g	4.78027	4.7712	5.45595	4.93551	4.89092	4.84632
CAGL0E02497g	CAGL0E02497g	5.94909	5.92588	6.13832	5.50198	5.77275	5.76613
CAGL0F05181g	CAGL0F05181g	6.29642	6.17732	6.417	6.11343	5.88592	6.10954
CAGL0A03905g	CAGL0A03905g	4.20492	4.35584	4.24679	4.5077	4.42021	3.89485
CAGL0C01485g	CAGL0C01485g	5.08374	5.12584	5.32702	5.22248	5.33003	5.43563
CAGL0K03223g	CAGL0K03223g	5.03069	4.84108	4.91531	4.6709	4.77669	4.92579
CAGL0I04664g	CAGL0I04664g	4.03412	3.97984	4.49637	3.81619	3.95005	4.23964
CAGL0L05896g	CAGL0L05896g	3.16341	3.34548	3.23234	3.26506	3.37809	3.62014
CAGL0M04697g	CAGL0M04697g	6.10629	6.00577	6.02225	5.76221	5.82665	5.89046
CAGL0H01947g	CAGL0H01947g	2.56855	2.68034	2.51405	2.7433	2.81307	3.00771
CAGL0B04851g	CAGL0B04851g	7.37996	7.44429	7.76693	7.45213	6.96694	7.2915
CAGL0M11660g	CAGL0M11660g	4.69482	4.59436	5.5716	3.68683	5.90154	4.94127
CAGL0M10417g	CAGL0M10417g	6.23252	6.33978	6.07515	5.74848	6.12249	6.39896
CAGL0E01309g	CAGL0E01309g	5.44646	5.49299	5.70384	5.02877	5.34137	5.24782
CAGL0M03597g	MID1	6.08799	6.05866	6.04116	5.90953	6.38938	6.5588
CAGL0L12188g	CAGL0L12188g	5.58905	5.67828	5.43976	5.27227	5.21221	5.49364
CAGL0J05852g	CAGL0J05852g	3.3066	3.53063	3.99405	4.58544	4.13461	3.87385
CAGL0L11132g	CAGL0L11132g	8.52746	8.4983	8.97559	8.57585	8.70261	8.85459
CAGL0F03421g	CAGL0F03421g	4.32994	4.40281	4.53013	4.32457	4.58523	4.8246
CAGL0L12650g	CAGL0L12650g	4.89912	4.91957	5.19861	4.8837	5.19504	5.29639
CAGL0F06589g	CAGL0F06589g	4.34108	4.38142	4.91691	4.42466	4.07274	4.28052
CAGL0B02761g	CAGL0B02761g	5.94571	6.03588	6.34353	5.91138	6.17989	6.21788
CAGL0L05626g	CAGL0L05626g	3.19531	3.37634	3.51265	3.34752	3.42899	3.34136
CAGL0G06336g	CAGL0G06336g	6.92973	6.92588	6.91212	6.66452	6.43336	6.68216
CAGL0I04950g	CAGL0I04950g	5.61778	5.67259	6.1218	5.7471	5.75142	5.82977
CAGL0K06369g	CAGL0K06369g	4.77618	4.61284	4.63212	4.25052	4.61356	4.73735
CAGL0H07535g	CAGL0H07535g	4.96537	5.01744	4.9443	4.99137	5.45531	5.41206
CAGL0L07194g	CAGL0L07194g	3.02626	2.92088	3.05427	2.64	2.90042	2.63467
CAGL0F04763g	CAGL0F04763g	4.86811	4.8958	4.65271	4.67816	5.08271	5.25852
CAGL0K01331g	CAGL0K01331g	5.22395	5.24803	4.92645	4.92883	5.05138	4.97487
CAGL0G07777g	CAGL0G07777g	6.98325	6.99959	7.35133	7.05146	7.16636	7.38634
CAGL0E01683g	CAGL0E01683g	7.20786	7.2834	7.09831	6.89931	6.90132	6.96824
CAGL0M03707g	CAGL0M03707g	6.894	6.96986	7.71275	6.93369	6.98086	6.91284
CAGL0J03256g	CAGL0J03256g	6.01488	6.0385	5.83176	5.28897	6.01894	6.1185
CAGL0I06116g	CAGL0I06116g	1.93263	2.26805	1.98291	2.21801	1.82261	2.19222
CAGL0D01914g	CAGL0D01914g	6.53171	6.443	6.557	6.02365	6.26639	6.37793
CAGL0M14003g	CAGL0M14003g	7.46239	7.49541	7.87181	7.20424	7.77632	7.48965
CAGL0G04807g	CAGL0G04807g	4.27377	4.38585	5.24891	5.52753	4.82594	4.93114
CAGL0K11110g	CAGL0K11110g	4.43834	4.507	4.68741	4.56757	4.75142	4.72136
CAGL0E01485g	CAGL0E01485g	4.90824	5.05449	4.7827	4.77277	5.12461	5.32883
CAGL0I09416g	CAGL0I09416g	4.3584	4.31394	3.96039	3.95058	4.18286	4.37714
CAGL0G08910g	CAGL0G08910g	4.82628	4.96596	4.72798	4.40641	4.60805	4.65748
CAGL0J04796g	CAGL0J04796g	6.35036	6.32897	6.62969	6.02707	6.08331	6.19467
CAGL0K08272g	CAGL0K08272g	6.93853	6.88757	7.14162	6.52189	7.07803	7.17583
CAGL0H09328g	CAGL0H09328g	8.09728	8.03427	7.91877	7.82014	7.72283	7.94154
CAGL0F08305g	CAGL0F08305g	5.2667	5.18333	5.64438	5.24662	5.54167	5.55949
CAGL0F07491g	CAGL0F07491g	7.16721	7.13884	7.21752	6.81866	6.77374	6.93875
CAGL0K08426g	CAGL0K08426g	8.27792	8.27246	7.9656	7.72878	8.23875	8.13421
CAGL0F07997g	CAGL0F07997g	6.34048	6.4575	6.16139	6.12861	5.97252	6.16564
CAGL0J02112g	CAGL0J02112g	5.3379	5.24176	5.12779	4.96371	5.20639	5.0972
CAGL0B00264g	MTLalpha2	-0.063174	0.551061	1.36922	0.473049	0.426485	0.781932
CAGL0H06721g	CAGL0H06721g	6.21663	6.22402	6.72647	6.23608	6.39131	6.55811
CAGL0F07381g	CAGL0F07381g	4.22567	4.35906	4.20385	4.47722	4.49735	4.60009
CAGL0E03564g	CAGL0E03564g	7.18497	7.18633	7.49013	7.18258	7.44978	7.66417
CAGL0G00726g	RFA1	6.49088	6.49431	5.99354	6.14547	6.55977	6.62891
CAGL0E02315g	CAGL0E02315g	5.60826	5.54173	5.16722	5.48593	5.35722	5.436
CAGL0L10626g	CAGL0L10626g	1.47635	1.71697	1.2926	1.13601	1.25091	1.53963
CAGL0G00308g	SCW4	9.15035	9.33039	9.93465	10.2022	9.71062	9.73301
CAGL0D06028g	CAGL0D06028g	2.56584	2.89802	2.78969	2.53515	2.23097	2.43185
CAGL0G09845g	CAGL0G09845g	4.20056	4.24036	3.96142	3.75159	3.96133	4.11143
CAGL0A02706g	CAGL0A02706g	2.33711	2.36099	2.47702	2.68395	2.56262	2.65813
CAGL0G04631g	CAGL0G04631g	7.57724	7.5838	7.23682	7.60386	7.67639	8.16199
CAGL0F07315g	CAGL0F07315g	6.027	6.00967	6.48062	6.20122	6.24276	6.22378
CAGL0E02123g	CAGL0E02123g	3.19531	3.26531	3.23746	3.20801	2.6995	2.75801
CAGL0L05126g	CAGL0L05126g	7.57539	7.52339	8.06517	7.71587	7.74791	7.77941
CAGL0G03685g	CAGL0G03685g	3.15261	3.15543	3.36922	2.95178	2.84715	2.81941
CAGL0E02409g	CAGL0E02409g	5.8894	6.0152	7.05088	6.20676	6.73153	6.82503
[truncated: 3,244 more rows]

## Sheet: Sup. Table S1 - sorted by rpkm 
rpkm expression of the six samples sorted
sample 1 cells grown in SD with thiamine 2 hr
sample 2 cells grown in SD without thiamine 2 hr
sample 3 cells grown in SD with thiamine 4 hr
sample 4 cells grown in SD without thiamine 4 hr
sample 5 thi3D cells grown in SD with thiamine 4 hr
sample 6 thi3D cells grown in SD without thiamine 4 hr
						Gene Identifier	Other ID	Gene Title		fold induced after 4 hr
0	2	0	6	0	0	-	CAGL0B00242g	CAGL0B00242g		#DIV/0!
0	0	0	2	0	2	-	CAGL0D06732g	EPA21		#DIV/0!
0	0	0	0	3	0	-	CAGL0G00110g	CAGL0G00110g		#DIV/0!
0	0	0	1	2	2	-	CAGL0G06644g	CAGL0G06644g		#DIV/0!
0	0	0	0	0	0	-	CAGL0A02277g	CAGL0A02277g		#DIV/0!
0	0	0	0	0	0	-	CAGL0M00110g	CAGL0M00110g		#DIV/0!
0	0	0	0	0	0	-	CaglfMp02	VAR1		#DIV/0!
0	0	0	0	0	0	-	CAGL0F09273g	CAGL0F09273g		#DIV/0!
0	0	0	0	0	0	-	CAGL0C03960g	CAGL0C03960g		#DIV/0!
0	0	0	0	0	0	-	CAGL0B05093g	CAGL0B05093g		#DIV/0!
0	0	0	0	1	0	-	CAGL0F03261g	CAGL0F03261g		#DIV/0!
0	0	0	0	0	0	-	CAGL0I04378g	CAGL0I04378g		#DIV/0!
0	0	0	0	0	0	-	CaglfMp08	ATP8		#DIV/0!
0	0	0	0	0	0	-	CAGL0C03938g	CAGL0C03938g		#DIV/0!
0	0	0	0	0	0	-	CAGL0A02255g	CAGL0A02255g		#DIV/0!
3	2	0	0	2	8	-	CAGL0M02541g	CAGL0M02541g		#DIV/0!
234	49396	371	215499	193	271	-	CAGL0M01166g	THI4		580.86
4896	340117	5339	751202	4672	4474	-	CAGL0C05071g	THI20		140.701
4092	347521	5193	516346	5246	4822	-	CAGL0G08448g	THI7		99.4312
3828	335988	3795	327889	4230	3736	-	CAGL0L07920g	PET18		86.4003
1057	50527	2060	159320	1929	1677	-	CAGL0K07568g	PMU3		77.3398
1689	5253	2893	101132	3529	4963	-	CAGL0K07546g	PMU2		34.9575
3937	53683	4044	71728	3701	3472	-	CAGL0E05808g	THI6		17.7369
1876	6073	1652	14787	1981	1766	-	CAGL0C00231g	CgFCY21		8.95097
0	4	1	6	0	0	-	CAGL0F00110g	CAGL0F00110g		6
883	74773	2811	15820	2223	2010	-	CAGL0G04081g	CgTHI73		5.62789
350	403	4802	25649	48832	48224	-	CAGL0J00451g	CgTDH3		5.34132
4133	11078	3604	18107	5108	4026	-	CAGL0G08954g	CAGL0G08954g		5.02414
2141	16218	696	3463	1700	1195	-	CAGL0I08613g	CAGL0I08613g		4.97557
3831	8018	2897	14143	4096	3260	-	CAGL0I07117g	CAGL0I07117g		4.88195
277	137	1333	5995	5902	9109	-	CAGL0E05984g	CAGL0E05984g		4.49737
1580	2523	1351	5986	2764	2297	-	CAGL0F08019g	PEX21		4.43079
4238	16743	5135	20983	5362	4427	-	CAGL0M00242g	CAGL0M00242g		4.08627
1028	1500	15281	60830	12300	9793	-	CAGL0G02585g	LYS12		3.98076
451	1674	5893	23049	5820	6462	-	CAGL0B01595g	CAGL0B01595g		3.91125
1882	2244	17743	61411	13290	12290	-	CAGL0L02079g	CAGL0L02079g		3.46114
1156	650	18319	63300	58028	49820	-	CAGL0J11550g	CAGL0J11550g		3.45543
8123	9814	14550	49656	17180	13239	-	CAGL0B00902g	HIS4		3.41278
8233	9546	7308	24826	11230	8657	-	CAGL0I07689g	CAGL0I07689g		3.3971
31	17	272	914	265	428	-	CAGL0B01875g	CAGL0B01875g		3.36029
582	2054	1001	3257	1153	1299	-	CAGL0M06435g	CAGL0M06435g		3.25375
5480	7181	40272	130300	34788	27589	-	CAGL0K07788g	CAGL0K07788g		3.2355
7817	10442	33136	102609	53955	127499	-	CAGL0E01353g	CAGL0E01353g		3.0966
2	6	2	6	0	0	-	CAGL0L00157g	CAGL0L00157g		3
8	0	1	3	5	5	-	CAGL0B01243g	MATalpha1		3
339	388	163	488	427	337	-	CAGL0M07832g	CAGL0M07832g		2.99387
745	849	11007	32446	15670	18782	-	CAGL0D04026g	CAGL0D04026g		2.94776
4580	5552	30265	88601	25976	20901	-	CAGL0F02431g	CAGL0F02431g		2.92751
13	20	47	137	33	80	-	CAGL0G04785g	CAGL0G04785g		2.91489
839	922	961	2784	2368	2437	-	CAGL0H04939g	CAGL0H04939g		2.89698
2877	3402	2807	8072	3569	2286	-	CAGL0F03641g	CAGL0F03641g		2.87567
245	369	844	2409	1776	2695	-	CAGL0C03872g	CAGL0C03872g		2.85427
388	497	357	937	1013	754	-	CAGL0D00264g	NUD1		2.62465
18	30	22	57	29	46	-	CAGL0K03355g	CAGL0K03355g		2.59091
953	1136	2188	5622	1786	1891	-	CAGL0I07711g	CAGL0I07711g		2.56947
42594	102525	28827	73414	31034	25320	-	CAGL0L00319g	ERG20		2.54671
302	406	487	1228	403	382	-	CAGL0L13354g	TNR1		2.52156
4911	6552	19926	50212	18309	19389	-	CAGL0H00704g	CAGL0H00704g		2.51992
8	9	14	35	8	11	-	CAGL0K07502g	CAGL0K07502g		2.5
12	8	4	10	1	10	-	CAGL0H00132g	CAGL0H00132g		2.5
4925	9329	18977	47244	24522	20250	-	CAGL0A01650g	CAGL0A01650g		2.48954
76	88	130	322	146	122	-	CAGL0M14113g	TNR2		2.47692
3397	4204	49908	120382	36819	30866	-	CAGL0F06875g	CAGL0F06875g		2.41208
4702	5970	86445	206978	55630	52205	-	CAGL0C03443g	LYS9		2.39433
28393	32466	76267	182607	78290	56645	-	CAGL0J09240g	LYS21		2.39431
1050	1072	18993	44988	51511	57880	-	CAGL0F08261g	CAGL0F08261g		2.36866
3514	4791	35825	84599	24035	22806	-	CAGL0K10978g	CAGL0K10978g		2.36145
11909	30585	22850	53090	36190	30228	-	CAGL0J08294g	CAGL0J08294g		2.32341
39	20	31	72	78	88	-	CAGL0D01694g	CAGL0D01694g		2.32258
65	83	13866	31679	30649	32904	-	CAGL0G05269g	CAGL0G05269g		2.28465
1103	1095	786	1729	1824	2237	-	CAGL0L07700g	CAGL0L07700g		2.19975
2145	2341	172	365	748	792	-	CAGL0K09042g	CAGL0K09042g		2.12209
13916	15675	7027	14862	12698	9725	-	CAGL0L10868g	CAGL0L10868g		2.11499
2363	3320	3596	7534	5522	4533	-	CAGL0F04125g	CAGL0F04125g		2.09511
6378	8479	12697	26499	11664	10113	-	CAGL0G02453g	CAGL0G02453g		2.08703
303	301	89868	185744	79115	53781	-	CAGL0J06402g	CAGL0J06402g		2.06685
1677	2483	2707	5564	5956	3411	-	CAGL0G04763g	CAGL0G04763g		2.05541
50306	56139	2675	5470	16688	13557	-	CAGL0E03245g	CAGL0E03245g		2.04486
592	835	22807	45869	10327	8956	-	CAGL0G01903g	MET1		2.01118
23	27	1	2	8	1	-	CAGL0M08096g	CAGL0M08096g		2
3863	6734	10043	19911	8856	8387	-	CAGL0G05676g	CAGL0G05676g		1.98257
9207	11807	10536	20663	7999	13773	-	CAGL0I05060g	CAGL0I05060g		1.96118
14012	14997	1936	3793	5321	4989	-	CAGL0I10560g	CAGL0I10560g		1.95919
12412	25937	4079	7951	7498	5802	-	CAGL0I02574g	CAGL0I02574g		1.94925
4051	12335	299466	583159	202390	295202	-	CAGL0K07337g	CAGL0K07337g		1.94733
7359	7822	353	687	1843	1847	-	CAGL0C01639g	CAGL0C01639g		1.94618
14316	18516	13545	26252	17470	15824	-	CAGL0K03465g	CAGL0K03465g		1.93813
4943	5549	565	1095	1907	2120	-	CAGL0G06248g	CAGL0G06248g		1.93805
860	995	182	352	723	669	-	CAGL0M11638g	CAGL0M11638g		1.93407
106	160	28	54	74	70	-	CAGL0B00220g	CAGL0B00220g		1.92857
2297	2514	178	340	750	705	-	CAGL0G05742g	CAGL0G05742g		1.91011
385	534	30303	57873	33326	102890	-	CAGL0G05632g	CAGL0G05632g		1.90981
3571	4193	3324	6279	7674	6321	-	CAGL0I02684g	CAGL0I02684g		1.88899
3753	4345	11583	21847	10792	9722	-	CAGL0M07403g	OAZ1		1.88613
1001	1315	3869	7244	4617	7427	-	CAGL0J05060g	CAGL0J05060g		1.87232
72	122	171	320	230	248	-	CAGL0I08943g	CAGL0I08943g		1.87135
4480	4670	1272	2376	2294	2032	-	CAGL0M01210g	CAGL0M01210g		1.86792
6315	7056	308	573	1413	1312	-	CAGL0M03905g	CAGL0M03905g		1.86039
773	1131	336	621	763	653	-	CAGL0C02299g	KRE29		1.84821
22	32	85	157	98	111	-	CAGL0E06292g	CAGL0E06292g		1.84706
6	18	11	20	21	20	-	CAGL0G09625g	CAGL0G09625g		1.81818
5010	6136	714	1295	2337	2111	-	CAGL0F08129g	SDA1		1.81373
5376	5718	950	1716	3839	3222	-	CAGL0F01727g	CAGL0F01727g		1.80632
16235	20623	6067	10915	9476	7003	-	CAGL0C01573g	CAGL0C01573g		1.79908
1745	2226	5110	9168	3902	3590	-	CAGL0I09108g	CAGL0I09108g		1.79413
10656	11752	729	1297	2468	2490	-	CAGL0L00341g	CAGL0L00341g		1.77915
3289	3723	1354	2385	2676	2316	-	CAGL0A02299g	CAGL0A02299g		1.76145
1959	2050	137	240	499	482	-	CAGL0G02629g	CAGL0G02629g		1.75182
9	16	12	21	10	5	-	CAGL0C05467g	CAGL0C05467g		1.75
7062	6775	350	610	1581	1511	-	CAGL0J11154g	CAGL0J11154g		1.74286
75003	92309	55398	96334	61777	53699	-	CAGL0B03047g	ILV5		1.73894
983	1066	534	926	3941	3937	-	CAGL0E05456g	CAGL0E05456g		1.73408
35	39	4870	8424	3631	3089	-	CAGL0B02651g	CAGL0B02651g		1.72977
29323	35518	17196	29688	29086	20849	-	CAGL0G01254g	ARO8		1.72645
55449	57321	24627	42177	32926	24383	-	CAGL0K04367g	CAGL0K04367g		1.71263
12966	13667	1088	1857	2916	2924	-	CAGL0M11154g	CAGL0M11154g		1.7068
3659	4014	37139	63252	18939	19038	-	CAGL0J11484g	DUG3		1.70312
70	121	55	93	105	106	-	CAGL0A03410g	CAGL0A03410g		1.69091
58659	63906	22979	38612	35381	23542	-	CAGL0H10142g	ARO3		1.68032
102	158	1029	1728	3766	2981	-	CAGL0M05401g	CAGL0M05401g		1.6793
9502	10926	11910	19907	18142	13417	-	CAGL0F07359g	CAGL0F07359g		1.67145
1	0	3	5	3	3	-	CAGL0J02046g	CAGL0J02046g		1.66667
18098	35900	38865	64728	46817	35559	-	CAGL0F07579g	CAGL0F07579g		1.66546
1809	1933	808	1339	1185	1269	-	CAGL0F03289g	CAGL0F03289g		1.65718
2811	3110	379	627	1392	1175	-	CAGL0I01826g	CAGL0I01826g		1.65435
51640	75675	71394	117764	85571	75782	-	CAGL0F07601g	CAGL0F07601g		1.64949
15664	17568	85873	141050	78723	69133	-	CAGL0F07029g	MET13		1.64254
12936	15604	39487	64832	32811	23653	-	CAGL0L00759g	HIS1		1.64186
3409	3801	698	1146	2123	2104	-	CAGL0L04026g	CAGL0L04026g		1.64183
5368	6168	331	542	1655	1581	-	CAGL0F01023g	CAGL0F01023g		1.63746
610	616	193	315	515	592	-	CAGL0I02376g	CAGL0I02376g		1.63212
11374	11631	636	1038	2658	2360	-	CAGL0J10032g	CAGL0J10032g		1.63208
348	489	1206	1965	1545	1486	-	CAGL0A01606g	CAGL0A01606g		1.62935
3553	4345	314	509	1531	1194	-	CAGL0J01265g	CAGL0J01265g		1.62102
7966	8638	224	360	1329	1232	-	CAGL0L11638g	CAGL0L11638g		1.60714
2997	2693	7088	11367	6809	5959	-	CAGL0K07205g	CAGL0K07205g		1.6037
10	10	5	8	1	7	-	CAGL0L03388g	CAGL0L03388g		1.6
6588	7199	516	825	1938	1799	-	CAGL0K03795g	CAGL0K03795g		1.59884
1396	1510	5611	8933	8485	6893	-	CAGL0M12793g	CAGL0M12793g		1.59205
4431	4846	499	794	1528	1370	-	CAGL0A03652g	CAGL0A03652g		1.59118
3669	4154	950	1498	2697	2287	-	CAGL0I03366g	CAGL0I03366g		1.57684
3037	3873	328	515	1225	1047	-	CAGL0I05588g	CAGL0I05588g		1.57012
11476	15657	9126	14314	16658	11875	-	CAGL0J08162g	CAGL0J08162g		1.56849
2625	3377	1251	1962	1539	1324	-	CAGL0J11330g	CAGL0J11330g		1.56835
1838	2146	42355	66362	10464	8677	-	CAGL0L06094g	STR3		1.5668
5207	5585	514	804	1670	1601	-	CAGL0J11066g	CAGL0J11066g		1.5642
9876	11573	12196	19069	12191	11090	-	CAGL0E02035g	CAGL0E02035g		1.56355
24	11	16	25	39	48	-	CAGL0L01023g	CAGL0L01023g		1.5625
30	49	25	39	25	37	-	CAGL0F02057g	CAGL0F02057g		1.56
84	83	25	39	47	48	-	CAGL0C01617g	CAGL0C01617g		1.56
45	36	209	326	213	324	-	CAGL0K10428g	CAGL0K10428g		1.55981
14675	15267	664	1033	2702	2441	-	CAGL0L02871g	CAGL0L02871g		1.55572
7576	8291	295	458	1777	1460	-	CAGL0E05478g	CAGL0E05478g		1.55254
885	1152	4361	6740	8801	9712	-	CAGL0A03740g	CAGL0A03740g		1.54552
3336	4039	222	343	1145	910	-	CAGL0G00264g	CAGL0G00264g		1.54505
13512	15366	1586	2437	3480	2578	-	CAGL0G02409g	CAGL0G02409g		1.53657
2920	4504	3123	4798	4846	4418	-	CAGL0I08591g	CAGL0I08591g		1.53634
5178	5721	324	495	1552	1330	-	CAGL0J10912g	CAGL0J10912g		1.52778
5334	6047	604	920	1950	1711	-	CAGL0K06457g	CAGL0K06457g		1.52318
3655	15068	109961	167357	58155	46772	-	CAGL0I02530g	CAGL0I02530g		1.52197
5772	7567	153177	232822	214788	181154	-	CAGL0K10164g	CAGL0K10164g		1.51995
2155	2801	5262	7987	5110	3882	-	CAGL0G04741g	CAGL0G04741g		1.51786
2389	3570	9177	13907	15489	12471	-	CAGL0J02508g	AWP1		1.51542
15	28	99	150	86	79	-	CAGL0G07645g	CAGL0G07645g		1.51515
11751	14885	66691	101042	67290	73152	-	CAGL0K10868g	CTA1		1.51508
2080	2412	1460	2207	1711	1432	-	CAGL0G06688g	MET4		1.51164
307	304	19259	28976	22413	28343	-	CAGL0J03080g	CAGL0J03080g		1.50454
12291	13989	33837	50797	20433	17909	-	CAGL0C01243g	CAGL0C01243g		1.50123
66	96	72	108	103	90	-	CAGL0E00110g	CAGL0E00110g		1.5
1712	2216	234	350	1057	910	-	CAGL0K00781g	CAGL0K00781g		1.49573
7933	8512	33789	50343	10740	9868	-	CAGL0M00154g	CYN1		1.48992
221	296	324	482	638	638	-	CAGL0F08173g	CAGL0F08173g		1.48765
55872	62015	29531	43805	46474	33960	-	CAGL0C04136g	CAGL0C04136g		1.48336
7835	8217	507	752	2153	1817	-	CAGL0K02233g	CAGL0K02233g		1.48323
74027	91578	28109	41673	56601	40140	-	CAGL0C04389g	CAGL0C04389g		1.48255
4400	5025	3436	5089	6106	5342	-	CAGL0M11176g	CAGL0M11176g		1.48108
7185	9570	1322	1952	7576	5472	-	CAGL0K09922g	CAGL0K09922g		1.47655
3495	3707	839	1238	1660	1784	-	CAGL0F02849g	CAGL0F02849g		1.47557
51889	61541	19059	28032	38731	25821	-	CAGL0K11440g	CAGL0K11440g		1.4708
25657	29446	2745	4028	7507	6226	-	CAGL0E03289g	CAGL0E03289g		1.4674
2900	4551	3087	4520	3154	2687	-	CAGL0D02882g	CAGL0D02882g		1.4642
3940	4193	277	405	1201	1026	-	CAGL0J10252g	CAGL0J10252g		1.46209
74620	89414	48565	70955	79663	63697	-	CAGL0H09856g	CAGL0H09856g		1.46103
5910	9521	7931	11560	8297	5812	-	CAGL0G06468g	CAGL0G06468g		1.45757
27778	31648	62302	90676	135140	91950	-	CAGL0A02233g	CAGL0A02233g		1.45543
1623	2033	973	1415	1401	1148	-	CAGL0L12584g	CAGL0L12584g		1.45427
1468	1554	19239	27963	30454	34517	-	CAGL0D03894g	CAGL0D03894g		1.45345
566	795	840	1220	937	1058	-	CAGL0L05346g	CAGL0L05346g		1.45238
30667	38344	1345	1942	7622	5198	-	CAGL0K01859g	CAGL0K01859g		1.44387
71085	80098	31597	45544	59946	37681	-	CAGL0K11462g	CAGL0K11462g		1.4414
64060	72467	91045	131232	205430	148910	-	CAGL0A02211g	CAGL0A02211g		1.4414
11898	17434	83167	119674	118613	129516	-	CAGL0H02585g	CAGL0H02585g		1.43896
23587	27907	7503	10786	15937	12330	-	CAGL0H04763g	CAGL0H04763g		1.43756
17267	23221	61835	88838	103775	85245	-	CAGL0G03773g	CAGL0G03773g		1.43669
15970	19265	70556	101313	32159	30086	-	CAGL0J10846g	CAGL0J10846g		1.43592
35866	66575	33565	48152	56727	47654	-	CAGL0E01969g	CAGL0E01969g		1.43459
5732	6882	984	1411	3322	2690	-	CAGL0J10010g	CAGL0J10010g		1.43394
2092	2581	21729	31149	34424	80104	-	CAGL0A01870g	CAGL0A01870g		1.43352
11323	14881	9265	13258	13731	16239	-	CAGL0I05082g	CAGL0I05082g		1.43098
94061	112884	34301	49065	66096	46405	-	CAGL0C04411g	CAGL0C04411g		1.43042
1655	2383	5117	7316	6282	6838	-	CAGL0F07513g	CAGL0F07513g		1.42974
1758	2266	3423	4892	2909	2700	-	CAGL0G05610g	CAGL0G05610g		1.42916
28	58	56	80	38	46	-	CAGL0G10219g	CAGL0G10219g		1.42857
23800	28959	2831	4026	8048	6642	-	CAGL0G03443g	CAGL0G03443g		1.42211
1908	2787	3327	4729	5344	5125	-	CAGL0J02530g	CAGL0J02530g		1.4214
3639	3893	1272	1808	1958	1701	-	CAGL0K06919g	MCX1		1.42138
17873	21503	48731	69172	58827	69756	-	CAGL0G08624g	CAGL0G08624g		1.41947
1746	1896	290	411	896	822	-	CAGL0F01925g	CAGL0F01925g		1.41724
4692	6579	3556	5039	8502	7681	-	CAGL0G07667g	CAGL0G07667g		1.41704
5924	7834	7556	10702	7762	6372	-	CAGL0A02574g	CAGL0A02574g		1.41636
293	421	36665	51906	12287	11336	-	CAGL0K08668g	MET28		1.41568
3063	3259	466	659	1404	1287	-	CAGL0M00946g	CAGL0M00946g		1.41416
12821	13775	901	1271	3573	3083	-	CAGL0H09724g	CAGL0H09724g		1.41065
885	1136	744	1048	1055	1010	-	CAGL0K02013g	CAGL0K02013g		1.4086
1903	2448	3973	5594	4311	3637	-	CAGL0G05093g	CAGL0G05093g		1.408
665	831	280	394	631	561	-	CAGL0D02860g	CAGL0D02860g		1.40714
2512	2722	190	267	761	764	-	CAGL0G00484g	CAGL0G00484g		1.40526
11190	11867	780	1095	3061	2547	-	CAGL0K01991g	CAGL0K01991g		1.40385
1413	1866	2950	4140	3220	4119	-	CAGL0L02607g	CAGL0L02607g		1.40339
34233	43284	3041	4258	11886	9010	-	CAGL0G08041g	CAGL0G08041g		1.4002
8052	9502	2808	3923	9633	6209	-	CAGL0I00484g	CAGL0I00484g		1.39708
618	681	1076	1503	1065	966	-	CAGL0I04972g	CAGL0I04972g		1.39684
5033	5081	1071	1496	2633	2842	-	CAGL0L03047g	CAGL0L03047g		1.39683
2713	2770	535	747	1183	1031	-	CAGL0M06567g	CAGL0M06567g		1.39626
5465	6735	65766	91721	93699	93598	-	CAGL0E01837g	YPS9		1.39466
11679	13573	22129	30741	15754	12952	-	CAGL0C01595g	CAGL0C01595g		1.38917
1587	2287	591	818	1434	1288	-	CAGL0D03652g	CAGL0D03652g		1.38409
1695	2014	1852	2562	2808	2609	-	CAGL0C04851g	CAGL0C04851g		1.38337
1510	2276	236915	327376	82302	67770	-	CAGL0B03839g	CAGL0B03839g		1.38183
7666	10111	26463	36508	36304	35486	-	CAGL0L12254g	CAGL0L12254g		1.37959
2239	3919	3612	4979	5367	2639	-	CAGL0J11242g	CAGL0J11242g		1.37846
213	175	9981	13717	12057	12455	-	CAGL0A02002g	CAGL0A02002g		1.37431
24338	27254	9055	12432	12343	9032	-	CAGL0F00253g	CAGL0F00253g		1.37294
10862	11602	44555	61144	20372	21668	-	CAGL0E04004g	CAGL0E04004g		1.37233
6471	6688	1389	1906	2815	2479	-	CAGL0K02387g	CAGL0K02387g		1.37221
914	1318	8666	11855	5929	5137	-	CAGL0D00902g	CAGL0D00902g		1.36799
3599	4224	723	988	1952	1584	-	CAGL0I03344g	CAGL0I03344g		1.36653
7851	10188	1556	2117	2885	2715	-	CAGL0J00385g	CAGL0J00385g		1.36054
3689	4410	86416	117487	116526	106512	-	CAGL0F07777g	CAGL0F07777g		1.35955
6598	7685	217381	295525	309617	280889	-	CAGL0J04202g	HSP12		1.35948
5249	6090	1191	1619	2844	2865	-	CAGL0A01067g	CAGL0A01067g		1.35936
34975	45428	48059	65295	101707	75617	-	CAGL0M09779g	CTS1		1.35864
1608	1798	304	413	636	666	-	CAGL0D00220g	CAGL0D00220g		1.35855
5975	7387	84861	115234	124605	117681	-	CAGL0B02563g	GIN3		1.35791
19154	20963	118159	159929	108745	90556	-	CAGL0J08316g	CAGL0J08316g		1.35351
6800	9704	3231	4373	7069	7863	-	CAGL0M03773g	CAGL0M03773g		1.35345
16094	28653	40600	54912	24421	18325	-	CAGL0L06138g	CAGL0L06138g		1.35251
16	8	20	27	15	10	-	CAGL0E06094g	CAGL0E06094g		1.35
8880	10036	7207	9709	4840	5425	-	CAGL0F06897g	CAGL0F06897g		1.34716
8978	10526	2996	4033	5408	4438	-	CAGL0M11616g	CAGL0M11616g		1.34613
11259	12494	775	1043	3457	2733	-	CAGL0L04950g	CAGL0L04950g		1.34581
19322	19791	698	938	3129	2531	-	CAGL0M10197g	CAGL0M10197g		1.34384
4377	7260	20057	26930	27915	21139	-	CAGL0K12254g	CAGL0K12254g		1.34267
24348	25843	1727	2312	5425	4668	-	CAGL0J02816g	CAGL0J02816g		1.33874
29103	35479	10373	13862	21056	17546	-	CAGL0L02915g	CAGL0L02915g		1.33635
2981	3765	1276	1705	3722	3530	-	CAGL0D00682g	CAGL0D00682g		1.33621
10089	11790	54971	73390	78366	80747	-	CAGL0I01100g	GCY1		1.33507
26548	31625	13440	17897	17863	16034	-	CAGL0B03993g	CAGL0B03993g		1.33162
1639	1936	961	1279	1662	1383	-	CAGL0G02013g	CAGL0G02013g		1.33091
2385	2620	242	322	573	593	-	CAGL0K02211g	CAGL0K02211g		1.33058
7005	7890	727	967	2332	2233	-	CAGL0J00957g	CAGL0J00957g		1.33012
20865	21340	1607	2129	4866	4466	-	CAGL0G07843g	CAGL0G07843g		1.32483
1525	2257	2055	2719	3201	3664	-	CAGL0A03102g	ARO10		1.32311
4309	5044	928	1227	2523	2062	-	CAGL0B01232g	EMG1		1.3222
547	703	524	691	812	783	-	CAGL0K11682g	CAGL0K11682g		1.3187
3049	4145	4733	6236	4821	4446	-	CAGL0E03113g	CAGL0E03113g		1.31756
97	131	3561	4686	4474	4674	-	CAGL0K05687g	CAGL0K05687g		1.31592
7103	7934	918	1207	2363	2587	-	CAGL0J01045g	CAGL0J01045g		1.31481
766	928	266	349	589	556	-	CAGL0D02970g	CAGL0D02970g		1.31203
3991	5050	55130	72282	59159	54183	-	CAGL0C04587g	CAGL0C04587g		1.31112
34909	47516	213194	278816	228510	196857	-	CAGL0G07623g	CAGL0G07623g		1.3078
28580	33296	3302	4314	11436	8606	-	CAGL0H02057g	CAGL0H02057g		1.30648
889	1262	1431	1868	1882	1296	-	CAGL0J05852g	CAGL0J05852g		1.30538
4069	4149	318	415	1241	1009	-	CAGL0M01056g	CAGL0M01056g		1.30503
3513	3925	276	360	1185	1050	-	CAGL0M11110g	CAGL0M11110g		1.30435
62745	69582	4365	5687	16310	13617	-	CAGL0A04015g	CAGL0A04015g		1.30286
5244	5593	677	882	1826	2010	-	CAGL0M02409g	CAGL0M02409g		1.30281
2379	2691	654	852	1428	1527	-	CAGL0H02079g	CAGL0H02079g		1.30275
16962	21872	14303	18598	22405	24397	-	CAGL0A01474g	CAGL0A01474g		1.30029
6386	7317	395	513	1792	1166	-	CAGL0J04576g	CAGL0J04576g		1.29873
73038	83171	44693	57985	69028	53127	-	CAGL0H09834g	CAGL0H09834g		1.29741
1219	2040	6908	8944	8702	11954	-	CAGL0I07249g	CAGL0I07249g		1.29473
371	509	869	1125	1084	1016	-	CAGL0A01584g	CAGL0A01584g		1.29459
2	4	17	22	8	5	-	CAGL0D06534g	CAGL0D06534g		1.29412
4610	5379	1893	2449	3059	2340	-	CAGL0C03289g	YBT1		1.29371
899	1187	951	1228	1131	1850	-	CAGL0J07876g	CAGL0J07876g		1.29127
1685	1959	991	1277	1181	1414	-	CAGL0F07645g	CAGL0F07645g		1.2886
11345	12705	969	1248	2698	2430	-	CAGL0D00880g	CAGL0D00880g		1.28793
2621	3198	7785	10026	14725	13711	-	CAGL0H06787g	CAGL0H06787g		1.28786
1372	1693	2815	3623	4538	4350	-	CAGL0K10824g	CAGL0K10824g		1.28703
4945	5633	3868	4976	4944	4008	-	CAGL0I03300g	CAGL0I03300g		1.28645
10882	13725	27466	35229	24530	22113	-	CAGL0L03630g	GSH1		1.28264
5330	5610	459	588	1721	1567	-	CAGL0I03608g	CAGL0I03608g		1.28105
458	597	570	729	837	758	-	CAGL0A01177g	CAGL0A01177g		1.27895
114142	133874	81110	103702	119293	90012	-	CAGL0C04114g	CAGL0C04114g		1.27854
1334	1580	163	208	432	353	-	CAGL0J02376g	CAGL0J02376g		1.27607
2350	3488	39417	50262	28252	27078	-	CAGL0H02563g	CAGL0H02563g		1.27514
8887	9693	913	1164	2996	2553	-	CAGL0M09977g	CAGL0M09977g		1.27492
2808	3544	2430	3092	3959	3023	-	CAGL0J03300g	CAGL0J03300g		1.27243
6347	7004	511	650	1260	1275	-	CAGL0M07678g	CAGL0M07678g		1.27202
2073	2510	3903	4947	5151	3992	-	CAGL0G08019g	CAGL0G08019g		1.26749
39139	47659	18959	24026	24495	19894	-	CAGL0K06787g	CAGL0K06787g		1.26726
3911	5252	7838	9916	9015	7010	-	CAGL0M06105g	CAGL0M06105g		1.26512
568	767	809	1023	1183	1279	-	CAGL0L10692g	CAGL0L10692g		1.26452
815	1099	726	917	1141	1040	-	CAGL0I02464g	CAGL0I02464g		1.26309
5636	6330	14381	18121	13297	9131	-	CAGL0K11616g	CAGL0K11616g		1.26007
7248	8265	1458	1837	3191	2814	-	CAGL0E05764g	CAGL0E05764g		1.25995
31237	34747	24630	31009	29964	24652	-	CAGL0H08541g	CAGL0H08541g		1.25899
484	457	1384	1738	2494	2006	-	CAGL0A01826g	CAGL0A01826g		1.25578
2093	2214	408	512	820	975	-	CAGL0J00891g	CAGL0J00891g		1.2549
176	325	1298	1626	1085	1253	-	CAGL0C01397g	CAGL0C01397g		1.2527
1449	1593	7047	8817	3366	3074	-	CAGL0M03971g	CAGL0M03971g		1.25117
119	175	64	80	120	71	-	CAGL0J06864g	CAGL0J06864g		1.25
7271	8946	15310	19137	17932	17347	-	CAGL0L00737g	CAGL0L00737g		1.24997
2019	2472	5883	7347	7216	8953	-	CAGL0I10582g	CAGL0I10582g		1.24885
2654	3071	13085	16340	15651	14124	-	CAGL0K12518g	CAGL0K12518g		1.24876
9487	11327	12064	15041	14937	11678	-	CAGL0H08393g	CAGL0H08393g		1.24677
1869	2085	218	271	572	592	-	CAGL0M04719g	CAGL0M04719g		1.24312
2690	3042	2059	2558	3014	2461	-	CAGL0M00264g	CAGL0M00264g		1.24235
7018	9245	8493	10547	11893	14542	-	CAGL0M07612g	CAGL0M07612g		1.24185
19942	25182	6127	7607	13155	11078	-	CAGL0B02607g	HEM1		1.24155
294	351	975	1209	2693	1359	-	CAGL0L11990g	CAGL0L11990g		1.24
4297	4507	325	403	1110	1062	-	CAGL0E02673g	CAGL0E02673g		1.24
1239	1504	1026	1272	1552	1871	-	CAGL0F03751g	CAGL0F03751g		1.23977
3266	4450	6725	8335	14798	11486	-	CAGL0K02277g	CAGL0K02277g		1.23941
516	531	1073	1329	1058	529	-	CAGL0D00154g	AQY1		1.23858
25983	29525	2688	3329	14138	8111	-	CAGL0J05984g	CAGL0J05984g		1.23847
4542	4677	8048	9966	6378	5279	-	CAGL0J03762g	MET7		1.23832
13932	18035	18301	22651	25039	23522	-	CAGL0J03212g	ALD5		1.23769
880	1142	2198	2720	1815	1495	-	CAGL0F05951g	CAGL0F05951g		1.23749
20755	22835	1880	2326	6092	5002	-	CAGL0K09614g	CAGL0K09614g		1.23723
5656	5457	291	360	1205	897	-	CAGL0L07678g	CAGL0L07678g		1.23711
760	1033	5278	6522	6882	7150	-	CAGL0D00198g	CAGL0D00198g		1.2357
8176	8767	660	815	2478	2146	-	CAGL0B00352g	CAGL0B00352g		1.23485
489	804	2588	3195	4011	3579	-	CAGL0E05962g	CAGL0E05962g		1.23454
1257	1713	1839	2265	1546	1584	-	CAGL0C03696g	CAGL0C03696g		1.23165
2625	3585	24337	29928	38917	38171	-	CAGL0M11902g	CAGL0M11902g		1.22973
1137	1165	424	521	957	1102	-	CAGL0M04587g	CAGL0M04587g		1.22877
2396	3045	7999	9823	8599	7353	-	CAGL0F07007g	CAGL0F07007g		1.22803
2973	3869	44172	54221	62644	56349	-	CAGL0J01331g	CAGL0J01331g		1.2275
6403	6578	803	985	2073	1910	-	CAGL0H06985g	CAGL0H06985g		1.22665
2437	2641	8652	10601	3241	2758	-	CAGL0K08800g	ADI1		1.22527
4897	5376	569	697	1815	1428	-	CAGL0H10252g	CAGL0H10252g		1.22496
124072	143216	46613	57009	92826	79355	-	CAGL0L05148g	CAGL0L05148g		1.22303
41	51	9	11	9	12	-	CAGL0M00792g	CAGL0M00792g		1.22222
132467	150812	896117	1095220	659442	492578	-	CAGL0I04994g	MET6		1.22218
35224	39734	1597	1947	7109	5650	-	CAGL0E05500g	CAGL0E05500g		1.21916
762	946	5499	6697	10574	10249	-	CAGL0L02167g	CAGL0L02167g		1.21786
6981	7520	535	651	1713	1453	-	CAGL0I06006g	CAGL0I06006g		1.21682
690	925	1701	2066	2431	2229	-	CAGL0K09900g	HAP5		1.21458
897	1100	3440	4176	3801	4361	-	CAGL0L00803g	CAGL0L00803g		1.21395
9785	10717	1660	2015	3769	3481	-	CAGL0I01606g	CAGL0I01606g		1.21386
28450	38059	102598	124468	85434	67966	-	CAGL0G06732g	CAGL0G06732g		1.21316
658	774	226	274	461	438	-	CAGL0L12782g	CAGL0L12782g		1.21239
7562	7998	593	717	1682	1464	-	CAGL0L03806g	CAGL0L03806g		1.20911
2786	3619	5818	7033	5324	4290	-	CAGL0E03267g	CAGL0E03267g		1.20883
5842	7726	23779	28738	27564	22881	-	CAGL0H04983g	PSA1		1.20855
1985	2486	19496	23504	21028	22537	-	CAGL0G06006g	CAGL0G06006g		1.20558
2869	3362	832	1002	1625	1460	-	CAGL0M13915g	CAGL0M13915g		1.20433
1838	1962	49022	59037	70978	75892	-	CAGL0K03421g	CAGL0K03421g		1.2043
9180	11100	8660	10428	10083	8308	-	CAGL0I10626g	CAGL0I10626g		1.20416
40134	47823	34560	41605	35460	28460	-	CAGL0J02882g	HOM3		1.20385
1180	1342	471	567	1134	975	-	CAGL0L02981g	CAGL0L02981g		1.20382
346	380	751	904	608	663	-	CAGL0J10868g	CAGL0J10868g		1.20373
11975	13087	758	912	2932	2602	-	CAGL0H07975g	CAGL0H07975g		1.20317
5612	7217	9303	11169	17450	13813	-	CAGL0L13222g	CAGL0L13222g		1.20058
2177	2315	434	521	1070	1170	-	CAGL0L07832g	CAGL0L07832g		1.20046
26	46	35	42	48	74	-	CAGL0H10626g	CAGL0H10626g		1.2
6	4	5	6	7	3	-	CAGL0L04832g	CAGL0L04832g		1.2
5505	6794	4032	4836	5623	5152	-	CAGL0F08481g	CAGL0F08481g		1.1994
14133	15758	2451	2936	4683	4940	-	CAGL0M06655g	CAGL0M06655g		1.19788
633	785	147	176	445	344	-	CAGL0A03674g	CAGL0A03674g		1.19728
7844	9803	92417	110593	114515	131075	-	CAGL0C00275g	HSP31		1.19667
36310	44093	4524	5413	18215	13335	-	CAGL0C02343g	CAGL0C02343g		1.19651
2840	3513	15488	18523	25329	23888	-	CAGL0A01716g	CAGL0A01716g		1.19596
47438	59588	4912	5873	15370	11794	-	CAGL0L10560g	PDR13		1.19564
1067	1623	3323	3973	4676	3789	-	CAGL0J02552g	CAGL0J02552g		1.19561
3264	3960	1176	1403	2230	2112	-	CAGL0A04037g	CAGL0A04037g		1.19303
3435	3653	945	1127	1877	1494	-	CAGL0M12639g	CAGL0M12639g		1.19259
27140	32430	4892	5831	9150	6132	-	CAGL0J00649g	CAGL0J00649g		1.19195
2097	2518	1166	1389	2142	1860	-	CAGL0E00759g	CAGL0E00759g		1.19125
3715	4531	16180	19255	23163	21666	-	CAGL0M13189g	MSN4		1.19005
5625	5934	1375	1634	3395	3656	-	CAGL0K06215g	CAGL0K06215g		1.18836
381	442	177	210	194	312	-	CAGL0F00341g	CAGL0F00341g		1.18644
79	115	141	167	142	135	-	CAGL0C00781g	CAGL0C00781g		1.1844
9805	10024	662	784	2102	1737	-	CAGL0E03069g	CAGL0E03069g		1.18429
1482	1717	920	1089	1402	1583	-	CAGL0H06897g	CAGL0H06897g		1.1837
300	439	382	452	474	464	-	CAGL0E00231g	CAGL0E00231g		1.18325
267	267	11390	13471	17464	16765	-	CAGL0M12551g	CAGL0M12551g		1.1827
10213	10989	955	1129	2794	2553	-	CAGL0F04983g	CAGL0F04983g		1.1822
6266	7041	1016	1201	2406	1908	-	CAGL0L12408g	CAGL0L12408g		1.18209
16334	18941	55183	65205	79722	78050	-	CAGL0K04235g	CAGL0K04235g		1.18161
503	645	707	835	2568	2198	-	CAGL0K01155g	CAGL0K01155g		1.18105
1314	1662	7947	9380	11689	10758	-	CAGL0M02387g	CAGL0M02387g		1.18032
918	1097	50	59	168	146	-	CAGL0J01023g	CAGL0J01023g		1.18
2778	3331	734	866	1912	1574	-	CAGL0C01925g	CAGL0C01925g		1.17984
17488	20135	72139	85054	41282	33170	-	CAGL0F01749g	CAGL0F01749g		1.17903
572	605	7583	8933	7562	10589	-	CAGL0K04631g	CAGL0K04631g		1.17803
13670	13994	840	989	3048	2550	-	CAGL0M04279g	CAGL0M04279g		1.17738
23377	30962	77044	90689	98138	75622	-	CAGL0E06424g	CAGL0E06424g		1.17711
3539	3663	697	820	1287	1184	-	CAGL0J06666g	CAGL0J06666g		1.17647
16104	19100	714	840	3449	2493	-	CAGL0B00792g	CAGL0B00792g		1.17647
4978	6391	441443	519236	175225	158827	-	CAGL0M00374g	CAGL0M00374g		1.17622
10504	12071	1182	1390	3593	2881	-	CAGL0E01573g	CAGL0E01573g		1.17597
1589	1736	574	675	983	935	-	CAGL0G01276g	CAGL0G01276g		1.17596
4959	6216	1867	2191	4733	4276	-	CAGL0L07348g	CAGL0L07348g		1.17354
3047	3502	1120	1311	2105	1902	-	CAGL0J06006g	CAGL0J06006g		1.17054
1391	1758	1606	1878	2222	2244	-	CAGL0M11814g	CAGL0M11814g		1.16936
345	492	266	311	460	546	-	CAGL0K07183g	CAGL0K07183g		1.16917
4087	5145	19407	22664	30935	32059	-	CAGL0E01881g	YPS11		1.16783
578	778	1766	2061	2145	2077	-	CAGL0C04719g	CAGL0C04719g		1.16704
15	14	30	35	55	56	-	CAGL0L01045g	CAGL0L01045g		1.16667
72050	85793	122086	142403	104432	83348	-	CAGL0H06369g	CYS3		1.16642
6543	7178	760	886	1896	1695	-	CAGL0D03124g	CAGL0D03124g		1.16579
1709	2265	2204	2567	2645	2953	-	CAGL0M13167g	CAGL0M13167g		1.1647
8487	9988	746	868	2298	1800	-	CAGL0L09669g	CAGL0L09669g		1.16354
3636	5097	3799	4413	4207	3709	-	CAGL0C01133g	CAGL0C01133g		1.16162
70181	74129	3588	4164	13345	10452	-	CAGL0I09790g	CAGL0I09790g		1.16054
8	2	25	29	9	28	-	CAGL0B00110g	CAGL0B00110g		1.16
2621	3843	3022	3504	4339	3702	-	CAGL0J03014g	CAGL0J03014g		1.1595
4117	4966	6172	7156	10568	10246	-	CAGL0C02981g	CAGL0C02981g		1.15943
6539	7958	8814	10210	15191	11799	-	CAGL0J08272g	CAGL0J08272g		1.15838
3623	3989	1954	2263	2255	1962	-	CAGL0J02398g	CAGL0J02398g		1.15814
4875	5208	515	596	1783	1801	-	CAGL0L05170g	CAGL0L05170g		1.15728
159	146	4244	4909	3734	4456	-	CAGL0H10164g	CAGL0H10164g		1.15669
21558	23691	2019	2334	7728	6063	-	CAGL0K00759g	ZPR1		1.15602
25307	30214	55337	63966	66937	80912	-	CAGL0J07568g	CAGL0J07568g		1.15594
8263	8611	719	831	1848	1749	-	CAGL0J10890g	CAGL0J10890g		1.15577
522	667	1377	1591	1502	2000	-	CAGL0I01870g	PEX24		1.15541
9631	12176	6478	7478	13635	10692	-	CAGL0J08184g	CAGL0J08184g		1.15437
3206	4116	1029	1187	2592	1740	-	CAGL0I09240g	CAGL0I09240g		1.15355
5881	6188	1586	1829	3239	2941	-	CAGL0L08976g	CAGL0L08976g		1.15322
138	143	170	196	155	160	-	CAGL0L05984g	CAGL0L05984g		1.15294
2295	2884	1917	2208	2475	2403	-	CAGL0L05368g	CAGL0L05368g		1.1518
1967	2742	2055	2360	2191	1957	-	CAGL0C00968g	CAGL0C00968g		1.14842
1114	1289	216	248	511	419	-	CAGL0B00374g	CAGL0B00374g		1.14815
1702	2028	277	318	373	495	-	CAGL0F05709g	CAGL0F05709g		1.14801
2235	2568	721	827	1356	1567	-	CAGL0E02937g	CAGL0E02937g		1.14702
52492	65744	78179	89638	164399	108047	-	CAGL0I06182g	PIR2		1.14657
93	142	28931	33158	48047	54989	-	CAGL0F04631g	CAGL0F04631g		1.14611
3144	3869	1197	1371	3573	2475	-	CAGL0I03476g	CAGL0I03476g		1.14536
3066	3815	29800	34088	44946	39524	-	CAGL0C02739g	CAGL0C02739g		1.14389
4254	4794	1038	1187	2107	2061	-	CAGL0D05874g	CAGL0D05874g		1.14355
22860	26819	4961	5669	11196	9641	-	CAGL0M06677g	CAGL0M06677g		1.14271
7889	8828	2641	3017	5333	4671	-	CAGL0A02673g	CAGL0A02673g		1.14237
1885	2052	612	699	907	874	-	CAGL0I07931g	CAGL0I07931g		1.14216
2073	2450	39059	44606	43625	38841	-	CAGL0G01738g	CAGL0G01738g		1.14202
647	813	388	443	592	590	-	CAGL0K01969g	CAGL0K01969g		1.14175
8173	9730	867	988	1998	1656	-	CAGL0J08679g	CAGL0J08679g		1.13956
16246	18633	1349	1537	4019	3155	-	CAGL0I08547g	CAGL0I08547g		1.13936
3165	3327	1883	2144	4166	2940	-	CAGL0B00836g	CAGL0B00836g		1.13861
4660	5521	788	897	2276	1990	-	CAGL0G01991g	CAGL0G01991g		1.13832
962	1057	918	1044	925	1061	-	CAGL0F03619g	CAGL0F03619g		1.13725
19716	20702	950	1080	4032	3621	-	CAGL0H05709g	CAGL0H05709g		1.13684
13211	16260	2101	2387	6291	5324	-	CAGL0D03674g	CAGL0D03674g		1.13613
4792	5056	533	605	1522	1314	-	CAGL0L03025g	CAGL0L03025g		1.13508
9648	11310	8795	9983	12809	11185	-	CAGL0H07491g	CAGL0H07491g		1.13508
1755	2175	2162	2454	2573	2315	-	CAGL0K08580g	CAGL0K08580g		1.13506
1993	2500	1342	1523	2611	2533	-	CAGL0G07084g	CAGL0G07084g		1.13487
4573	5355	2789	3161	5174	3291	-	CAGL0K12210g	CAGL0K12210g		1.13338
14837	14654	893	1012	3486	2951	-	CAGL0H03773g	CAGL0H03773g		1.13326
5020	5765	2278	2580	3170	2366	-	CAGL0M04059g	CAGL0M04059g		1.13257
3481	4063	8593	9729	5885	6044	-	CAGL0H02497g	CAGL0H02497g		1.1322
13272	15586	5007	5667	12700	10247	-	CAGL0J04598g	CAGL0J04598g		1.13182
76451	85380	3326	3764	13200	10197	-	CAGL0F03927g	CAGL0F03927g		1.13169
2349	2653	513	579	1087	1050	-	CAGL0D05016g	CAGL0D05016g		1.12865
6020	6533	2056	2320	4395	3766	-	CAGL0I01254g	CAGL0I01254g		1.1284
27156	38101	10784	12166	29795	26496	-	CAGL0J03146g	CAGL0J03146g		1.12815
902	1038	493	556	884	862	-	CAGL0H04917g	CAGL0H04917g		1.12779
691	933	321	362	811	734	-	CAGL0M11836g	CAGL0M11836g		1.12773
47950	85388	70757	79724	80068	61389	-	CAGL0J09350g	CDC48		1.12673
15544	17576	2286	2574	5682	4824	-	CAGL0M09845g	CAGL0M09845g		1.12598
3056	6508	11690	13162	12810	9718	-	CAGL0H02541g	CAGL0H02541g		1.12592
1307	1740	9167	10316	7250	7985	-	CAGL0B01925g	CAGL0B01925g		1.12534
5825	7002	17145	19275	32178	24460	-	CAGL0G09515g	CAGL0G09515g		1.12423
452118	552153	117938	132382	265961	194585	-	CAGL0D01188g	TEF1		1.12247
65488	75630	3626	4069	19129	12857	-	CAGL0K10780g	CAGL0K10780g		1.12217
11137	15408	14434	16185	22356	18468	-	CAGL0E02915g	CAGL0E02915g		1.12131
7185	7983	759	851	1858	1616	-	CAGL0B04169g	CAGL0B04169g		1.12121
3362	3324	10762	12046	5658	6056	-	CAGL0G01947g	CAGL0G01947g		1.11931
1552	1732	3097	3466	2701	2617	-	CAGL0L12562g	CAGL0L12562g		1.11915
2401	2898	2446	2735	4397	4324	-	CAGL0B04301g	CAGL0B04301g		1.11815
5074	5888	15230	17023	17624	18716	-	CAGL0L05742g	CAGL0L05742g		1.11773
1447	1616	3597	4020	4930	5082	-	CAGL0H08063g	CAGL0H08063g		1.1176
22610	27937	1678	1875	6812	4727	-	CAGL0J01848g	CAGL0J01848g		1.1174
17159	20950	13546	15136	21918	25320	-	CAGL0G04631g	CAGL0G04631g		1.11738
1003	1320	1258	1405	2026	1737	-	CAGL0J07590g	CAGL0J07590g		1.11685
3962	4929	2072	2313	4719	4839	-	CAGL0M10219g	CAGL0M10219g		1.11631
15658	19302	42642	47598	31553	35383	-	CAGL0G05566g	CAGL0G05566g		1.11622
10243	10277	36818	41084	64537	70665	-	CAGL0C03740g	CAGL0C03740g		1.11587
280	383	940	1048	1437	1435	-	CAGL0L05258g	CAGL0L05258g		1.11489
4136	5201	2170	2419	5450	4979	-	CAGL0K11506g	CAGL0K11506g		1.11475
16170	16535	1356	1511	4461	3535	-	CAGL0I07975g	CAGL0I07975g		1.11431
355	423	509	567	612	546	-	CAGL0A03586g	CAGL0A03586g		1.11395
5853	6139	683	760	1797	1673	-	CAGL0G07535g	CAGL0G07535g		1.11274
101425	106585	8152	9057	26780	21453	-	CAGL0H03685g	CAGL0H03685g		1.11102
7639	9474	1393	1547	3177	2912	-	CAGL0D05060g	CAGL0D05060g		1.11055
3062	3547	15854	17597	17240	17376	-	CAGL0H10362g	CAGL0H10362g		1.10994
1668	2059	10730	11892	13856	14062	-	CAGL0K02629g	CAGL0K02629g		1.10829
32463	39375	92369	102304	123325	115118	-	CAGL0C00319g	CAGL0C00319g		1.10756
26277	32175	22804	25243	21739	17660	-	CAGL0M11484g	CAGL0M11484g		1.10695
369	513	24662	27299	9038	6750	-	CAGL0K06677g	MET8		1.10693
6401	8849	8903	9825	9715	8632	-	CAGL0M10725g	CAGL0M10725g		1.10356
1526	1876	2648	2922	2997	1924	-	CAGL0I02508g	CAGL0I02508g		1.10347
3064	3606	1556	1717	2907	2557	-	CAGL0H00935g	CAGL0H00935g		1.10347
5095	6442	1754	1935	4104	3824	-	CAGL0G08129g	CAGL0G08129g		1.10319
1791	2885	7334	8082	9706	9383	-	CAGL0E00803g	CAGL0E00803g		1.10199
7709	9288	13438	14803	14281	13483	-	CAGL0A01672g	CAGL0A01672g		1.10158
2705	2699	475	523	939	847	-	CAGL0M06589g	CAGL0M06589g		1.10105
0	0	10	11	4	0	-	CAGL0E06688g	EPA3		1.1
5743	6890	25023	27523	18658	17088	-	CAGL0G06424g	CAGL0G06424g		1.09991
43321	50982	10420	11450	21894	14531	-	CAGL0F08459g	CAGL0F08459g		1.09885
24080	29037	57015	62617	69563	56999	-	CAGL0H04125g	CAGL0H04125g		1.09825
15	12	938	1030	906	856	-	CAGL0G06050g	CAGL0G06050g		1.09808
13	14	51	56	61	38	-	CAGL0I02596g	CAGL0I02596g		1.09804
8299	8887	756	829	2600	1948	-	CAGL0E02343g	CAGL0E02343g		1.09656
1312	1580	509	558	1081	860	-	CAGL0B02277g	CAGL0B02277g		1.09627
18475	26845	26310	28835	43398	24805	-	CAGL0I06743g	CAGL0I06743g		1.09597
8514	11736	19095	20925	29052	23869	-	CAGL0A04081g	CAGL0A04081g		1.09584
52993	67194	104844	114868	137439	134909	-	CAGL0J11770g	CAGL0J11770g		1.09561
4946	5974	6381	6991	10684	8864	-	CAGL0H09812g	CAGL0H09812g		1.0956
1134	1415	1633	1789	1662	1869	-	CAGL0H06347g	CAGL0H06347g		1.09553
2880	3592	5318	5825	6008	4969	-	CAGL0J11308g	CAGL0J11308g		1.09534
1274	1499	1760	1927	2682	2524	-	CAGL0B04939g	CAGL0B04939g		1.09489
499	544	2877	3149	3451	4619	-	CAGL0A02145g	CAGL0A02145g		1.09454
836	1069	3875	4241	4629	4093	-	CAGL0G01892g	CAGL0G01892g		1.09445
1629	2141	6787	7424	5944	8798	-	CAGL0E00649g	CAGL0E00649g		1.09386
2123	2667	2644	2891	2531	2750	-	CAGL0G08426g	CAGL0G08426g		1.09342
484	679	546	597	563	580	-	CAGL0G02233g	CAGL0G02233g		1.09341
3496	3961	2991	3270	3966	3803	-	CAGL0M07898g	CAGL0M07898g		1.09328
3806	4429	2333	2550	5395	4712	-	CAGL0C01661g	CAGL0C01661g		1.09301
2523	3434	1689	1845	2325	2249	-	CAGL0I10791g	CAGL0I10791g		1.09236
3586	4781	4732	5168	9802	7403	-	CAGL0J10318g	CAGL0J10318g		1.09214
24720	27572	7949	8681	17991	14406	-	CAGL0L11484g	CAGL0L11484g		1.09209
12869	19656	20702	22595	30452	27318	-	CAGL0J00847g	CAGL0J00847g		1.09144
15370	17289	5283	5762	10559	8359	-	CAGL0K00957g	CAGL0K00957g		1.09067
355640	424317	40632	44294	127230	65780	-	CAGL0G02079g	CAGL0G02079g		1.09013
41638	53263	26578	28964	50757	52084	-	CAGL0M13805g	MP65		1.08977
2668	3545	16272	17729	15617	16837	-	CAGL0C01771g	CAGL0C01771g		1.08954
583	779	313	341	454	423	-	CAGL0D02018g	CAGL0D02018g		1.08946
4443	5363	10581	11525	11477	11906	-	CAGL0H01177g	CAGL0H01177g		1.08922
1334	1606	2371	2582	2800	2735	-	CAGL0F03113g	CAGL0F03113g		1.08899
14062	19814	34010	36986	30250	28871	-	CAGL0L12914g	CAGL0L12914g		1.0875
13863	17785	439241	476928	172664	148440	-	CAGL0D06402g	MET15		1.0858
1344	1840	4960	5385	4643	4431	-	CAGL0F04191g	CAGL0F04191g		1.08569
8453	9239	2726	2957	4551	4092	-	CAGL0L10164g	CAGL0L10164g		1.08474
4927	5616	2676	2900	3902	3803	-	CAGL0H08580g	CAGL0H08580g		1.08371
3274	4165	3170	3434	4923	4889	-	CAGL0C04433g	CAGL0C04433g		1.08328
6088	7580	9919	10743	12232	11209	-	CAGL0I05698g	CAGL0I05698g		1.08307
9978	11488	1469	1591	3863	3461	-	CAGL0M06369g	CAGL0M06369g		1.08305
245	272	879	952	1297	1250	-	CAGL0D04686g	CAGL0D04686g		1.08305
53363	77714	112127	121260	136986	127607	-	CAGL0B03069g	TAL1		1.08145
2588	2939	875	946	1802	1771	-	CAGL0I09196g	CAGL0I09196g		1.08114
2	6	148	160	109	99	-	CAGL0K00170g	EPA22		1.08108
866	948	7545	8155	6088	6397	-	CAGL0E02651g	CAGL0E02651g		1.08085
4383	5087	3227	3487	4392	3827	-	CAGL0E02315g	CAGL0E02315g		1.08057
5916	7631	34559	37343	46879	47903	-	CAGL0K04301g	CAGL0K04301g		1.08056
20641	24756	3489	3770	7365	6483	-	CAGL0I08393g	TIF3		1.08054
3746	4435	92274	99663	51458	39504	-	CAGL0I01276g	CAGL0I01276g		1.08008
12709	13263	1978	2136	4500	4467	-	CAGL0B00484g	CAGL0B00484g		1.07988
46989	57091	13010	14042	24616	20533	-	CAGL0L11792g	CAGL0L11792g		1.07932
399	457	681	735	614	482	-	CAGL0I10604g	CAGL0I10604g		1.0793
1563	2078	2337	2521	3790	3418	-	CAGL0E06248g	RCN1		1.07873
13641	19666	10241	11039	17360	13125	-	CAGL0M05599g	CAGL0M05599g		1.07792
6716	7313	1547	1667	3446	3235	-	CAGL0M09801g	CAGL0M09801g		1.07757
31207	40914	40531	43667	55082	49587	-	CAGL0L01089g	CAGL0L01089g		1.07737
609	694	427	460	663	752	-	CAGL0J11088g	CAGL0J11088g		1.07728
1266	1494	1975	2127	2659	2691	-	CAGL0M03663g	CAGL0M03663g		1.07696
938	1317	1353	1456	942	1264	-	CAGL0G03905g	CAGL0G03905g		1.07613
2653	3496	220449	237090	128259	112453	-	CAGL0D05280g	CAGL0D05280g		1.07549
63854	73827	25107	26997	43016	36167	-	CAGL0C01947g	CAGL0C01947g		1.07528
354	422	7937	8533	8436	10832	-	CAGL0I05610g	CAGL0I05610g		1.07509
10330	11909	533	573	2248	1623	-	CAGL0L10890g	CAGL0L10890g		1.07505
2871	3658	3181	3418	4192	4019	-	CAGL0I01694g	CAGL0I01694g		1.0745
3246	4187	31256	33572	34018	39176	-	CAGL0F04807g	CAGL0F04807g		1.0741
19992	25724	23864	25624	38996	31907	-	CAGL0C02035g	CAGL0C02035g		1.07375
53944	58359	3679	3949	10220	7136	-	CAGL0I03234g	CAGL0I03234g		1.07339
1415	1639	518	556	1082	888	-	CAGL0H07271g	CAGL0H07271g		1.07336
6871	7813	8815	9458	13403	12183	-	CAGL0K09064g	CAGL0K09064g		1.07294
7481	8924	2671	2864	4270	4168	-	CAGL0A04257g	CAGL0A04257g		1.07226
9243	11247	45663	48953	46300	40171	-	CAGL0L04708g	CAGL0L04708g		1.07205
6434	7893	14518	15552	24173	20073	-	CAGL0E01793g	YPS6		1.07122
417029	524934	117348	125627	312679	259844	-	CAGL0B03487g	TEF3		1.07055
1632	1865	709	759	1110	910	-	CAGL0D06094g	CAGL0D06094g		1.07052
466	579	613	656	1081	1135	-	CAGL0M00968g	CAGL0M00968g		1.07015
1830	2258	14369	15372	13847	13189	-	CAGL0E06380g	CAGL0E06380g		1.0698
22	58	72	77	46	35	-	CAGL0H04015g	CAGL0H04015g		1.06944
8269	8938	1007	1076	2637	2403	-	CAGL0H02937g	CAGL0H02937g		1.06852
12917	17158	23447	25038	37626	37722	-	CAGL0M10549g	CAGL0M10549g		1.06786
12537	13731	2443	2608	4795	4083	-	CAGL0M00484g	CAGL0M00484g		1.06754
2998	4431	3385	3613	3580	3260	-	CAGL0C01067g	CAGL0C01067g		1.06736
2962	3487	14198	15150	15327	15964	-	CAGL0G05357g	CAGL0G05357g		1.06705
670	854	634	676	924	818	-	CAGL0D05632g	CAGL0D05632g		1.06625
47003	69766	63964	68140	97055	79232	-	CAGL0H00506g	ATP2		1.06529
1162	1557	1479	1575	1774	1714	-	CAGL0J01980g	CAGL0J01980g		1.06491
64987	96261	107800	114764	143156	101938	-	CAGL0H03993g	CAGL0H03993g		1.0646
1651	2148	2642	2811	3110	3285	-	CAGL0G01386g	CAGL0G01386g		1.06397
3890	4154	725	771	1890	1695	-	CAGL0L11594g	CAGL0L11594g		1.06345
5756	6254	854	908	2368	1981	-	CAGL0J03344g	CAGL0J03344g		1.06323
4426	5522	9530	10119	7704	5635	-	CAGL0B03289g	CAGL0B03289g		1.0618
5064	5799	1335	1417	3608	3437	-	CAGL0L09581g	CAGL0L09581g		1.06142
932	1020	11155	11837	11846	15011	-	CAGL0H04037g	CAGL0H04037g		1.06114
8831	10650	32133	34093	37835	29562	-	CAGL0M11242g	CAGL0M11242g		1.061
387	443	46348	49118	27495	27362	-	CAGL0K07678g	CAGL0K07678g		1.05977
3056	3570	4538	4809	3979	2950	-	CAGL0I07315g	CAGL0I07315g		1.05972
5424	5805	492	521	1541	1223	-	CAGL0J09746g	CAGL0J09746g		1.05894
1260	1639	12370	13093	10732	15163	-	CAGL0B01078g	CAGL0B01078g		1.05845
8004	8605	1999	2114	3675	3348	-	CAGL0E01067g	CAGL0E01067g		1.05753
15187	16879	1759	1860	4402	4010	-	CAGL0L08756g	CAGL0L08756g		1.05742
1790	2229	3263	3449	3411	3228	-	CAGL0K02827g	CAGL0K02827g		1.057
5035	7334	10484	11078	11177	12105	-	CAGL0D02794g	CAGL0D02794g		1.05666
1489	1781	22317	23578	24038	23154	-	CAGL0F00869g	CAGL0F00869g		1.0565
5034	5486	4084	4312	5578	5802	-	CAGL0E01705g	CAGL0E01705g		1.05583
2178	2496	3600	3800	4986	4827	-	CAGL0L11616g	CAGL0L11616g		1.05556
11163	12962	55387	58448	36581	28351	-	CAGL0K00913g	CAGL0K00913g		1.05527
7984	8871	1694	1786	3817	3431	-	CAGL0A00627g	CAGL0A00627g		1.05431
2070	2585	13442	14163	17319	14658	-	CAGL0M06633g	CAGL0M06633g		1.05364
181559	212869	93530	98530	142598	97513	-	CAGL0I10648g	ASN2		1.05346
50	61	131	138	180	207	-	CAGL0M07634g	CAGL0M07634g		1.05344
82079	109572	61244	64496	67255	62801	-	CAGL0J09922g	CAGL0J09922g		1.0531
62684	82271	143355	150967	217637	159372	-	CAGL0E01177g	CPR1		1.0531
479	599	793	835	975	913	-	CAGL0B03611g	CAGL0B03611g		1.05296
20676	29732	30328	31918	53361	40284	-	CAGL0C03223g	CAGL0C03223g		1.05243
16874	20171	4399	4629	9378	7336	-	CAGL0C05181g	CAGL0C05181g		1.05228
20091	22096	3422	3600	7765	6668	-	CAGL0F07139g	CAGL0F07139g		1.05202
1203	1426	7924	8331	12855	10997	-	CAGL0H09460g	CAGL0H09460g		1.05136
1295	1612	3237	3403	5141	4106	-	CAGL0K08756g	CAGL0K08756g		1.05128
9616	10476	2290	2407	3590	2953	-	CAGL0L12672g	CAGL0L12672g		1.05109
1738	2283	3415	3589	3039	2697	-	CAGL0G04807g	CAGL0G04807g		1.05095
18703	21138	29558	31059	31343	21806	-	CAGL0K07436g	CAGL0K07436g		1.05078
1634	2382	1410	1481	1764	1730	-	CAGL0C01309g	CAGL0C01309g		1.05035
2488	3178	1776	1865	2409	2055	-	CAGL0J01309g	CAGL0J01309g		1.05011
1152	1320	719	755	1267	1171	-	CAGL0B03861g	CAGL0B03861g		1.05007
54978	76179	79284	83244	96276	89490	-	CAGL0M09581g	ATP1		1.04995
52867	63091	8819	9254	30076	22874	-	CAGL0E05390g	ALA1		1.04933
20839	25281	19858	20829	29177	27198	-	CAGL0L02035g	CAGL0L02035g		1.0489
21831	24201	1177	1234	4671	3604	-	CAGL0L06314g	CAGL0L06314g		1.04843
771	814	250	262	438	565	-	CAGL0M10681g	CAGL0M10681g		1.048
676	706	613	642	988	891	-	CAGL0E01023g	CAGL0E01023g		1.04731
1681	2241	1655	1733	2420	2144	-	CAGL0F07381g	CAGL0F07381g		1.04713
3490	3873	957	1002	1911	1696	-	CAGL0B01485g	CAGL0B01485g		1.04702
1079	1385	539	564	1128	870	-	CAGL0K00935g	CAGL0K00935g		1.04638
4641	5135	7262	7598	9038	8519	-	CAGL0M01078g	CAGL0M01078g		1.04627
54327	66573	52617	55018	113397	105557	-	CAGL0E04334g	ERG11		1.04563
4115	5215	7066	7388	6608	5427	-	CAGL0F06743g	CAGL0F06743g		1.04557
5487	6563	4715	4928	5232	4213	-	CAGL0K01661g	CAGL0K01661g		1.04517
34980	43871	60610	63347	51605	53898	-	CAGL0I10494g	CAGL0I10494g		1.04516
898	1243	671	701	983	1010	-	CAGL0G06864g	CAGL0G06864g		1.04471
4228	5124	6864	7170	6843	6358	-	CAGL0K00517g	CAGL0K00517g		1.04458
538	637	2780	2900	2744	3454	-	CAGL0J05830g	CAGL0J05830g		1.04317
985	1081	2781	2901	3583	3686	-	CAGL0H03663g	CAGL0H03663g		1.04315
1470	1655	4734	4938	5751	5778	-	CAGL0H04543g	CAGL0H04543g		1.04309
164290	221086	263628	274969	367923	377904	-	CAGL0M13343g	GND1		1.04302
51056	70301	87890	91662	89777	75229	-	CAGL0G00308g	SCW4		1.04292
3371	4205	30306	31580	43186	36876	-	CAGL0I07865g	CAGL0I07865g		1.04204
28165	38248	32678	34027	66752	45483	-	CAGL0I01342g	CAGL0I01342g		1.04128
59967	71013	22301	23195	41247	31899	-	CAGL0L12760g	CAGL0L12760g		1.04009
2585	3536	14320	14894	12229	12488	-	CAGL0L00957g	CAGL0L00957g		1.04008
42953	55013	86325	89735	130608	105998	-	CAGL0C05137g	CAGL0C05137g		1.0395
9915	13111	13135	13646	23814	18437	-	CAGL0J09328g	CAGL0J09328g		1.0389
1657	2236	1705	1770	2294	1315	-	CAGL0A03905g	CAGL0A03905g		1.03812
592	722	2105	2185	2415	3026	-	CAGL0C02365g	CAGL0C02365g		1.038
10077	11671	3090	3206	6277	4913	-	CAGL0F07095g	CAGL0F07095g		1.03754
5328	7411	2396	2484	3943	2789	-	CAGL0C05115g	ARG1		1.03673
3419	4405	17290	17924	22466	23141	-	CAGL0D06600g	CAGL0D06600g		1.03667
538	743	848	879	1032	1119	-	CAGL0M05181g	CAGL0M05181g		1.03656
6400	7671	2181	2260	6279	5045	-	CAGL0G06666g	CAGL0G06666g		1.03622
4974	5341	1022	1059	1933	2020	-	CAGL0I09350g	CAGL0I09350g		1.0362
4024	4987	1604	1662	3769	2782	-	CAGL0G08085g	CAGL0G08085g		1.03616
1813	2244	1523	1577	1977	1877	-	CAGL0I08767g	CAGL0I08767g		1.03546
1054	1246	2243	2321	2422	2526	-	CAGL0C04004g	CAGL0C04004g		1.03477
1081	1205	261	270	463	564	-	CAGL0F01551g	CAGL0F01551g		1.03448
103550	134374	208660	215783	291447	233065	-	CAGL0H10076g	CAGL0H10076g		1.03414
449	433	415	429	825	708	-	CAGL0I09680g	CAGL0I09680g		1.03373
2603	3334	92409	95460	100232	105195	-	CAGL0G05544g	CAGL0G05544g		1.03302
2453	2623	1185	1224	1792	1613	-	CAGL0G03069g	CAGL0G03069g		1.03291
433621	508903	47728	49270	127590	72625	-	CAGL0M02695g	CAGL0M02695g		1.03231
25088	28108	13744	14187	13791	10957	-	CAGL0I05016g	TRP2		1.03223
14614	16943	1801	1859	5126	4056	-	CAGL0C00737g	CAGL0C00737g		1.0322
6548	7888	11298	11660	8710	8141	-	CAGL0J01375g	CAGL0J01375g		1.03204
1607	2214	11861	12238	8614	8180	-	CAGL0K00231g	CAGL0K00231g		1.03178
1789	1998	640	660	1174	1176	-	CAGL0L07458g	CAGL0L07458g		1.03125
1977	2159	517	533	1095	999	-	CAGL0J07986g	CAGL0J07986g		1.03095
5594	7964	7665	7900	12980	10850	-	CAGL0M02123g	CAGL0M02123g		1.03066
5371	6555	9874	10174	12350	10483	-	CAGL0C03597g	ABP1		1.03038
14212	15441	1513	1558	4394	3651	-	CAGL0J07766g	CAGL0J07766g		1.02974
346	398	987	1016	1366	1254	-	CAGL0D00946g	CAGL0D00946g		1.02938
5910	6936	4202	4325	5815	4306	-	CAGL0I10879g	PEX25		1.02927
6673	8345	55405	57009	61727	55952	-	CAGL0L04598g	CAGL0L04598g		1.02895
1288	1525	691	711	1000	1041	-	CAGL0M04543g	CAGL0M04543g		1.02894
3472	3991	835	859	1335	1337	-	CAGL0I06490g	CAGL0I06490g		1.02874
4543	5239	2385	2452	3393	3435	-	CAGL0L02695g	CAGL0L02695g		1.02809
87	103	4176	4289	6238	4254	-	CAGL0H07469g	CAGL0H07469g		1.02706
9081	10471	4053	4162	9219	7205	-	CAGL0J07436g	PDR16		1.02689
5133	6372	45680	46899	53879	44282	-	CAGL0M04675g	CAGL0M04675g		1.02669
33332	43300	40757	41842	73125	50376	-	CAGL0I06204g	PIR1		1.02662
8894	11826	7175	7363	11651	10691	-	CAGL0E02321g	CAGL0E02321g		1.0262
520	615	387	397	458	493	-	CAGL0F02475g	CAGL0F02475g		1.02584
8745	9097	2636	2703	4719	4295	-	CAGL0C01331g	CAGL0C01331g		1.02542
5604	6397	717	735	1889	1605	-	CAGL0D02838g	CAGL0D02838g		1.0251
711	813	359	368	603	624	-	CAGL0K01441g	CAGL0K01441g		1.02507
1326	1836	1212	1242	2317	1860	-	CAGL0M12496g	CAGL0M12496g		1.02475
21935	26516	18144	18586	27181	22316	-	CAGL0L02343g	CAGL0L02343g		1.02436
6037	7475	9939	10179	18007	15491	-	CAGL0D04752g	CAGL0D04752g		1.02415
2095	2789	4199	4300	3401	2698	-	CAGL0I08525g	CAGL0I08525g		1.02405
5687	5892	1050	1075	2358	2148	-	CAGL0F07403g	CAGL0F07403g		1.02381
17653	23087	103995	106459	121820	100259	-	CAGL0G05830g	CAGL0G05830g		1.02369
1704	2018	3117	3190	3275	3590	-	CAGL0L02761g	CAGL0L02761g		1.02342
2390	2698	215	220	788	646	-	CAGL0F06809g	CAGL0F06809g		1.02326
2011	2634	4138	4233	3627	3631	-	CAGL0L12298g	CAGL0L12298g		1.02296
2157	2432	1060	1084	1668	1469	-	CAGL0M11264g	CAGL0M11264g		1.02264
2084	2278	708	724	1575	1407	-	CAGL0B04279g	CAGL0B04279g		1.0226
10691	15447	17468	17860	26760	21208	-	CAGL0L10406g	CYT1		1.02244
12162	13688	3891	3978	8582	7233	-	CAGL0M00638g	CAGL0M00638g		1.02236
220	266	224	229	305	359	-	CAGL0M13013g	CAGL0M13013g		1.02232
1208	1560	5171	5286	9333	7882	-	CAGL0K02519g	CAGL0K02519g		1.02224
6047	6874	1829	1869	3476	3109	-	CAGL0L11528g	CAGL0L11528g		1.02187
16675	19722	6886	7036	11835	10976	-	CAGL0C04301g	CAGL0C04301g		1.02178
1242	1552	1855	1895	2418	2406	-	CAGL0F00979g	CAGL0F00979g		1.02156
46327	54989	11340	11584	23826	20039	-	CAGL0G03091g	CAGL0G03091g		1.02152
437	479	234	239	440	556	-	CAGL0J09482g	CAGL0J09482g		1.02137
7106	7669	1416	1446	3317	3009	-	CAGL0M13431g	CAGL0M13431g		1.02119
8856	10681	2510	2563	4993	4329	-	CAGL0J05412g	CAGL0J05412g		1.02112
19265	24866	64839	66204	77899	67143	-	CAGL0I01122g	GRE3		1.02105
17656	22617	121331	123806	122502	117487	-	CAGL0M13651g	CAGL0M13651g		1.0204
4629	5955	1830	1867	2766	2273	-	CAGL0M05203g	CAGL0M05203g		1.02022
25938	32335	30945	31570	53323	45777	-	CAGL0I00748g	CAGL0I00748g		1.0202
133999	151674	19633	20027	43283	28475	-	CAGL0J09086g	CAGL0J09086g		1.02007
2778	3268	599	611	1301	1309	-	CAGL0M03619g	CAGL0M03619g		1.02003
56648	72611	38218	38981	69096	55991	-	CAGL0B02585g	CAGL0B02585g		1.01996
935	1322	1156	1179	1391	1269	-	CAGL0E03784g	CAGL0E03784g		1.0199
1727	1805	1064	1085	1614	1344	-	CAGL0G07529g	CAGL0G07529g		1.01974
343	526	355	362	379	404	-	CAGL0I06116g	CAGL0I06116g		1.01972
4733	5619	15184	15481	21424	18857	-	CAGL0L10186g	CAGL0L10186g		1.01956
7869	9454	6957	7093	8942	14583	-	CAGL0H05687g	CAGL0H05687g		1.01955
981	1151	824	840	1293	1040	-	CAGL0G03333g	CAGL0G03333g		1.01942
4028	5327	3071	3130	4634	3901	-	CAGL0I09570g	CAGL0I09570g		1.01921
4586	5409	967	985	1954	1946	-	CAGL0H01419g	CAGL0H01419g		1.01861
8413	8706	1204	1226	2367	2050	-	CAGL0J10802g	CAGL0J10802g		1.01827
9058	9946	17884	18206	20749	17461	-	CAGL0I04708g	PDX3		1.018
2030	2584	810	824	1810	1361	-	CAGL0C03003g	CAGL0C03003g		1.01728
31	44	175	178	242	263	-	CAGL0I07425g	CAGL0I07425g		1.01714
2006	2113	1361	1384	2480	2025	-	CAGL0J05742g	CAGL0J05742g		1.0169
101	162	122	124	177	165	-	CAGL0G00462g	CAGL0G00462g		1.01639
8428	12621	23834	24217	38394	33171	-	CAGL0K08624g	CAGL0K08624g		1.01607
2036	2406	3028	3076	3371	3490	-	CAGL0K05643g	CAGL0K05643g		1.01585
533	700	513	521	753	711	-	CAGL0H01947g	CAGL0H01947g		1.01559
5972	8451	10531	10695	12505	10293	-	CAGL0E04378g	CAGL0E04378g		1.01557
9109	10420	5448	5532	6829	6388	-	CAGL0F03861g	CAGL0F03861g		1.01542
13225	15921	1742	1767	4822	3813	-	CAGL0C03369g	CAGL0C03369g		1.01435
2441	3666	3557	3608	3789	3247	-	CAGL0I08635g	CAGL0I08635g		1.01434
642	888	1085	1100	1450	1651	-	CAGL0E04554g	CAGL0E04554g		1.01382
2203	2400	1278	1295	1381	1331	-	CAGL0I10538g	CAGL0I10538g		1.0133
175053	192999	147283	149220	152123	118348	-	CAGL0L02475g	GCN4		1.01315
3654	4415	4633	4691	6728	5016	-	CAGL0A02816g	CAGL0A02816g		1.01252
5791	8054	15131	15313	13801	15527	-	CAGL0L09691g	CAGL0L09691g		1.01203
1555	2116	775	784	1721	1380	-	CAGL0I01958g	CAGL0I01958g		1.01161
776	1087	1467	1484	1668	1669	-	CAGL0M07183g	CAGL0M07183g		1.01159
1099	1362	49718	50269	21394	18965	-	CAGL0I08503g	CAGL0I08503g		1.01108
14291	16558	17644	17832	29553	27173	-	CAGL0D00286g	BMT1		1.01066
5514	6293	2785	2813	3747	3810	-	CAGL0M01232g	CAGL0M01232g		1.01005
855	896	905	914	908	892	-	CAGL0M13607g	CAGL0M13607g		1.00994
117	162	417	421	280	229	-	CAGL0L12320g	CAGL0L12320g		1.00959
15708	20708	8603	8684	18517	16195	-	CAGL0K08514g	CAGL0K08514g		1.00942
1384	1629	1074	1084	1740	1589	-	CAGL0G03135g	CAGL0G03135g		1.00931
2635	2810	4840	4885	8358	5958	-	CAGL0E01243g	CAGL0E01243g		1.0093
264	364	447	451	506	489	-	CAGL0B01012g	CAGL0B01012g		1.00895
6091	7797	5657	5707	6734	8337	-	CAGL0G07997g	CAGL0G07997g		1.00884
9969	11149	3653	3685	5985	5210	-	CAGL0H01441g	CAGL0H01441g		1.00876
36873	43094	5885	5931	16034	13414	-	CAGL0D00550g	CAGL0D00550g		1.00782
4752	6244	3868	3898	5897	4957	-	CAGL0M11462g	CAGL0M11462g		1.00776
653	914	814	820	980	863	-	CAGL0K01947g	CAGL0K01947g		1.00737
1229	1490	1125	1133	1644	1592	-	CAGL0G09251g	CAGL0G09251g		1.00711
11519	14241	3797	3822	6260	4946	-	CAGL0J00671g	CAGL0J00671g		1.00658
32	40	161	162	132	216	-	CAGL0C04213g	CAGL0C04213g		1.00621
1140	1488	644	648	1299	934	-	CAGL0I09592g	CAGL0I09592g		1.00621
36702	42734	315027	316875	57389	63324	-	CAGL0B02838g	MUP1		1.00587
59498	75831	13031	13103	31381	23545	-	CAGL0G04851g	SUR4		1.00553
3100	3627	4371	4394	3555	3676	-	CAGL0K08316g	RHO4		1.00526
301	425	383	385	479	372	-	CAGL0E02211g	CAGL0E02211g		1.00522
2418	3084	36938	37120	45368	39538	-	CAGL0H02387g	CAGL0H02387g		1.00493
2583	3382	3313	3329	4288	3921	-	CAGL0J01353g	CAGL0J01353g		1.00483
10428	13086	23993	24106	38413	34857	-	CAGL0L10043g	CAGL0L10043g		1.00471
2582	2999	853	857	2115	2007	-	CAGL0M06809g	CAGL0M06809g		1.00469
1670	1729	1958	1967	2370	2414	-	CAGL0G02145g	CAGL0G02145g		1.0046
1429	1581	224	225	673	510	-	CAGL0H02189g	CAGL0H02189g		1.00446
1434	1977	2968	2980	3550	3861	-	CAGL0H08558g	ATG11		1.00404
3098	3347	1052	1056	1577	1181	-	CAGL0K07942g	CAGL0K07942g		1.0038
5121	6837	15861	15920	22558	16371	-	CAGL0M09229g	CAGL0M09229g		1.00372
1075	1305	3248	3259	3751	3947	-	CAGL0F08327g	CAGL0F08327g		1.00339
1321	1862	659	661	827	949	-	CAGL0K06435g	CAGL0K06435g		1.00303
3070	3738	10972	10997	7517	7083	-	CAGL0M00550g	CAGL0M00550g		1.00228
55715	72640	58406	58526	101661	79822	-	CAGL0D02530g	EGT2		1.00205
1562	1748	636	637	1215	1055	-	CAGL0A00847g	CAGL0A00847g		1.00157
2559	3530	3613	3618	3578	3610	-	CAGL0E05324g	CAGL0E05324g		1.00138
2252	3144	2135	2137	2347	2082	-	CAGL0J01177g	CAGL0J01177g		1.00094
12252	14355	5610	5615	7729	7377	-	CAGL0H05093g	CAGL0H05093g		1.00089
2139	3213	3093	3094	4003	3819	-	CAGL0F01111g	CAGL0F01111g		1.00032
16763	17685	41811	41820	49522	63062	-	CAGL0G03883g	CAGL0G03883g		1.00022
1	6	3	3	3	0	-	CAGL0L04836g	CAGL0L04836g		1
24	21	53	53	56	34	-	CAGL0A03300g	CAGL0A03300g		1
29	31	51	51	34	27	-	CAGL0L06072g	CAGL0L06072g		1
454	561	500	500	633	558	-	CAGL0A02706g	CAGL0A02706g		1
29	53	52	52	64	33	-	CAGL0C02629g	CAGL0C02629g		1
2260	3542	3128	3128	3306	2158	-	CAGL0H07667g	CAGL0H07667g		1
25	24	18	18	18	19	-	CAGL0L05324g	CAGL0L05324g		1
34	23	9	9	24	13	-	CAGL0K11484g	CAGL0K11484g		1
4	7	1	1	0	3	-	CAGL0M00704g	CAGL0M00704g		1
1784	2302	292	292	789	584	-	CAGL0M03487g	CAGL0M03487g		1
6011	7061	62055	62052	63506	65634	-	CAGL0C04191g	CAGL0C04191g		0.999952
1947	2357	2520	2519	4575	4101	-	CAGL0K10604g	CAGL0K10604g		0.999603
5258	6309	47525	47504	47981	44206	-	CAGL0B02860g	CAGL0B02860g		0.999558
289192	352381	39034	39001	101300	68004	-	CAGL0C05379g	SSB1		0.999155
1113	1358	1156	1155	1516	1417	-	CAGL0J11814g	CAGL0J11814g		0.999135
3124	3968	9508	9498	10120	10081	-	CAGL0M13937g	CAGL0M13937g		0.998948
43984	51567	55233	55158	88682	72961	-	CAGL0G05896g	CAGL0G05896g		0.998642
8110	10328	5008	5001	8068	7180	-	CAGL0J00341g	CAGL0J00341g		0.998602
4812	5460	421	420	1379	1164	-	CAGL0D04884g	CAGL0D04884g		0.997625
9318	10430	1193	1190	3016	2447	-	CAGL0E00979g	CAGL0E00979g		0.997485
1920	2413	1581	1577	2355	2018	-	CAGL0H00825g	CAGL0H00825g		0.99747
759	1037	701	699	672	656	-	CAGL0I10340g	PWP5		0.997147
4269	4773	314	313	986	816	-	CAGL0B01397g	NOP8		0.996815
789	1046	861	858	1131	846	-	CAGL0J05159g	CAGL0J05159g		0.996516
1574	1772	939	935	1950	1875	-	CAGL0H01023g	CAGL0H01023g		0.99574
16431	18728	1330	1324	4655	3138	-	CAGL0M12122g	CAGL0M12122g		0.995489
3187	4436	2293	2282	3214	2781	-	CAGL0E00715g	CAGL0E00715g		0.995203
297	383	349	347	383	504	-	CAGL0G01562g	CAGL0G01562g		0.994269
8144	9551	10553	10491	22014	14947	-	CAGL0C02827g	CAGL0C02827g		0.994125
7231	9498	9075	9021	11751	9301	-	CAGL0G03971g	CAGL0G03971g		0.99405
2143	3076	1933	1921	2871	2347	-	CAGL0H01353g	CAGL0H01353g		0.993792
2786	3735	2625	2608	3216	2948	-	CAGL0C04477g	MED2		0.993524
3164	3853	2699	2681	3634	3354	-	CAGL0L12276g	CAGL0L12276g		0.993331
2753	3429	1651	1639	2703	2890	-	CAGL0I10901g	CAGL0I10901g		0.992732
206692	225754	35827	35555	80692	57173	-	CAGL0F08547g	EFB1		0.992408
4366	4738	753	747	1670	1440	-	CAGL0F06523g	CAGL0F06523g		0.992032
949	982	373	370	596	439	-	CAGL0M10912g	CAGL0M10912g		0.991957
1267	1511	3162	3135	3954	3570	-	CAGL0F02255g	CAGL0F02255g		0.991461
19487	26076	3007	2980	6940	3610	-	CAGL0J06374g	CAGL0J06374g		0.991021
2316	2586	1728	1712	2411	2220	-	CAGL0J01067g	CAGL0J01067g		0.990741
25878	30726	6541	6480	10847	8151	-	CAGL0H02409g	CAGL0H02409g		0.990674
1532	1732	1279	1267	1536	1587	-	CAGL0M08976g	CAGL0M08976g		0.990618
31950	38297	26788	26536	27393	20470	-	CAGL0E05016g	CAGL0E05016g		0.990593
14848	16961	3498	3465	9521	7081	-	CAGL0B04433g	CAGL0B04433g		0.990566
933	1223	2617	2592	3142	3541	-	CAGL0M08228g	CAGL0M08228g		0.990447
2824	3762	3031	3002	4360	3430	-	CAGL0A03927g	CAGL0A03927g		0.990432
6275	7793	26394	26141	32637	29827	-	CAGL0B04323g	CAGL0B04323g		0.990414
1255	1326	2581	2556	2416	2534	-	CAGL0L10384g	CAGL0L10384g		0.990314
1106	1444	408	404	778	688	-	CAGL0F00473g	CAGL0F00473g		0.990196
12779	17168	80682	79884	101531	91113	-	CAGL0J09812g	TPS1		0.990109
356	505	703	696	1045	921	-	CAGL0G01408g	CAGL0G01408g		0.990043
34080	37975	2806	2778	7555	6424	-	CAGL0F04433g	URA7		0.990021
1151	1574	2704	2677	3735	3536	-	CAGL0C03553g	CAGL0C03553g		0.990015
2174	2442	3378	3344	3922	4475	-	CAGL0I01012g	CAGL0I01012g		0.989935
547	568	765	757	743	790	-	CAGL0J07414g	CAGL0J07414g		0.989542
3976	4853	3495	3458	6343	5953	-	CAGL0D00330g	HYM1		0.989413
45684	62048	8461	8367	16305	10345	-	CAGL0E00869g	CAGL0E00869g		0.98889
175223	224919	25140	24856	46840	17605	-	CAGL0D02090g	ASC1		0.988703
854	1238	708	700	1561	1723	-	CAGL0E04224g	CAGL0E04224g		0.988701
1013	1253	526	520	899	902	-	CAGL0K04983g	CAGL0K04983g		0.988593
803343	986850	363036	358892	579133	464013	-	CAGL0K07832g	CAGL0K07832g		0.988585
1363	1808	1282	1267	1641	1440	-	CAGL0F07623g	CAGL0F07623g		0.9883
203	224	426	421	309	398	-	CAGL0K07634g	CAGL0K07634g		0.988263
5497	6302	1348	1332	2868	2303	-	CAGL0H07205g	CAGL0H07205g		0.988131
967	1074	542	535	991	946	-	CAGL0H06589g	CAGL0H06589g		0.987085
11818	14046	26040	25696	28783	32406	-	CAGL0M08250g	CAGL0M08250g		0.98679
131	210	377	372	395	370	-	CAGL0J04290g	CAGL0J04290g		0.986737
6853	7863	1730	1707	3219	2778	-	CAGL0I07997g	CAGL0I07997g		0.986705
928	1116	368	363	615	547	-	CAGL0I09174g	CAGL0I09174g		0.986413
100409	129694	449261	443046	545242	469211	-	CAGL0J06050g	CAGL0J06050g		0.986166
6173	7785	4591	4527	8412	7337	-	CAGL0M03993g	CAGL0M03993g		0.98606
4225	4420	1042	1027	1744	1698	-	CAGL0F02299g	CAGL0F02299g		0.985605
7494	9741	12268	12087	12728	10832	-	CAGL0A00781g	CAGL0A00781g		0.985246
9473	11001	7587	7475	6934	6925	-	CAGL0M02783g	CAGL0M02783g		0.985238
81	84	528	520	585	711	-	CAGL0I03168g	CAGL0I03168g		0.984848
4128	4814	1488	1465	2793	2421	-	CAGL0H05863g	CAGL0H05863g		0.984543
16288	22619	14256	14034	15857	13157	-	CAGL0L02805g	CAGL0L02805g		0.984428
25407	29189	3634	3574	11033	8097	-	CAGL0I02398g	CAGL0I02398g		0.983489
6522	6978	2285	2247	4746	3600	-	CAGL0K09416g	CAGL0K09416g		0.98337
1087	1422	415	408	677	578	-	CAGL0H09438g	CAGL0H09438g		0.983133
1951	2496	6938	6820	8177	7484	-	CAGL0I09284g	CAGL0I09284g		0.982992
7010	9794	3233	3175	7182	6946	-	CAGL0G08668g	CAGL0G08668g		0.98206
1759	2127	4368	4289	4281	4189	-	CAGL0E05786g	CAGL0E05786g		0.981914
1398	1791	1216	1194	1677	1300	-	CAGL0K12320g	CAGL0K12320g		0.981908
1555	1875	1632	1602	2167	1896	-	CAGL0G07821g	CAGL0G07821g		0.981618
646	819	964	946	1150	1059	-	CAGL0J04686g	ATG17		0.981328
5380	7145	73785	72397	70298	68210	-	CAGL0F04719g	CAGL0F04719g		0.981189
2270	2886	4815	4724	5625	5482	-	CAGL0K08228g	CAGL0K08228g		0.981101
11100	12414	46603	45715	69206	63756	-	CAGL0K07458g	CAGL0K07458g		0.980945
1372	1630	457	448	565	408	-	CAGL0E01155g	CAGL0E01155g		0.980306
5672	5651	8510	8341	7482	6789	-	CAGL0L01067g	CAGL0L01067g		0.980141
2660	3013	5268	5163	5933	6725	-	CAGL0D03938g	CAGL0D03938g		0.980068
3955	4843	4383	4292	5500	5409	-	CAGL0J09526g	CAGL0J09526g		0.979238
5322	6060	800	783	1689	1246	-	CAGL0M10527g	CAGL0M10527g		0.97875
9636	11574	223437	218593	291628	273219	-	CAGL0F00605g	GLK1		0.978321
10135	12326	42840	41909	50032	61681	-	CAGL0F04697g	CAGL0F04697g		0.978268
1825	2476	35902	35119	36475	32027	-	CAGL0G02849g	CAGL0G02849g		0.978191
2487	2999	5425	5303	6720	6609	-	CAGL0D06006g	CAGL0D06006g		0.977512
3205	4129	14471	14143	17474	14123	-	CAGL0J07084g	CAGL0J07084g		0.977334
5460	6940	23207	22677	28205	25131	-	CAGL0D00704g	CAGL0D00704g		0.977162
5820	7472	29490	28815	27899	28738	-	CAGL0K06237g	CAGL0K06237g		0.977111
10709	11768	869	849	3604	2609	-	CAGL0J03476g	CAGL0J03476g		0.976985
2699	3403	4644	4533	7480	5978	-	CAGL0F01969g	CAGL0F01969g		0.976098
3321	3939	448	437	1195	983	-	CAGL0D04180g	CAGL0D04180g		0.975446
1820	2402	3673	3582	4749	4388	-	CAGL0J01287g	AIP1		0.975225
14272	17111	8401	8190	10231	7642	-	CAGL0F08371g	TNA1		0.974884
16220	18544	1545	1506	5066	3965	-	CAGL0L11660g	CAGL0L11660g		0.974757
2576	3702	4328	4218	3730	3450	-	CAGL0E01331g	SWI5		0.974584
2721	3432	3053	2974	2977	2982	-	CAGL0H05907g	CAGL0H05907g		0.974124
7741	7349	1221	1189	2913	2206	-	CAGL0K12804g	CAGL0K12804g		0.973792
1423	1501	371	361	1876	836	-	CAGL0F00715g	CAGL0F00715g		0.973046
2440	3155	2324	2261	3311	2744	-	CAGL0F07249g	CAGL0F07249g		0.972892
228396	315981	323873	314934	399285	324387	-	CAGL0M11726g	CAGL0M11726g		0.9724
5347	6880	3531	3432	6122	5432	-	CAGL0I05302g	CAGL0I05302g		0.971963
2232	2439	5658	5499	8203	9462	-	CAGL0H04873g	CAGL0H04873g		0.971898
7827	9594	12801	12441	13902	12300	-	CAGL0B04521g	CAGL0B04521g		0.971877
2922	3127	532	517	914	876	-	CAGL0J05698g	CAGL0J05698g		0.971805
3293	4255	1795	1744	3552	2798	-	CAGL0B03707g	CAGL0B03707g		0.971588
1743	2176	18640	18108	11078	11518	-	CAGL0L06006g	CAGL0L06006g		0.971459
3910	5139	9869	9582	16646	14114	-	CAGL0I05934g	CAGL0I05934g		0.970919
6632	8390	4228	4105	6738	6137	-	CAGL0A02409g	CAGL0A02409g		0.970908
62471	68811	189741	184156	90381	65545	-	CAGL0M12837g	CAGL0M12837g		0.970565
16684	18004	4046	3924	9062	9792	-	CAGL0E05874g	CAGL0E05874g		0.969847
1227	1555	3668	3557	4667	4580	-	CAGL0J02904g	CAGL0J02904g		0.969738
1553	1916	2737	2653	3779	3053	-	CAGL0F08723g	CAGL0F08723g		0.969309
16732	17245	3209	3110	6478	6506	-	CAGL0L10516g	CAGL0L10516g		0.969149
4887	6356	3964	3840	5792	4620	-	CAGL0A04059g	NMT1		0.968718
15552	16995	2489	2411	5482	4621	-	CAGL0F02541g	CAGL0F02541g		0.968662
9172	12090	12089	11707	18431	14010	-	CAGL0L09801g	RAM2		0.968401
15280	18598	5535	5360	9955	8386	-	CAGL0C01221g	CAGL0C01221g		0.968383
1266	1662	2494	2415	1672	1991	-	CAGL0J07700g	CAGL0J07700g		0.968324
996	1306	1009	977	1501	1203	-	CAGL0I08987g	CAGL0I08987g		0.968285
6469	7737	8414	8147	17103	13434	-	CAGL0L04664g	HEM15		0.968267
3036	4112	1727	1672	1889	1396	-	CAGL0L12606g	CAGL0L12606g		0.968153
1360	1657	137135	132716	56497	44332	-	CAGL0L02321g	CAGL0L02321g		0.967776
1316	1447	5156	4989	8269	8051	-	CAGL0F08085g	CAGL0F08085g		0.967611
1166	1366	1438	1390	1550	1541	-	CAGL0I05742g	CAGL0I05742g		0.96662
1640	2076	448	433	774	770	-	CAGL0L04114g	CAGL0L04114g		0.966518
4536	5408	5510	5325	6099	5893	-	CAGL0J05104g	CAGL0J05104g		0.966425
6348	7853	5179	5005	6421	6686	-	CAGL0M10307g	CAGL0M10307g		0.966403
54245	68441	20935	20223	33661	25845	-	CAGL0I01408g	CYC1		0.96599
6729	7297	1555	1502	2925	2627	-	CAGL0L05566g	CAGL0L05566g		0.965916
5589	5884	1759	1699	3563	2625	-	CAGL0D01562g	FCY1		0.96589
2634	3239	14154	13669	7831	6873	-	CAGL0L00781g	MET30		0.965734
132	196	291	281	222	295	-	CAGL0K12716g	CAGL0K12716g		0.965636
120	146	843	814	570	623	-	CAGL0L06512g	CAGL0L06512g		0.965599
764	891	610	589	771	788	-	CAGL0G00330g	CAGL0G00330g		0.965574
6998	8965	11638	11232	14362	12895	-	CAGL0G08690g	CAGL0G08690g		0.965114
17705	23244	28084	27102	20081	15738	-	CAGL0E01133g	HOM2		0.965033
2351	3201	1428	1378	1870	1623	-	CAGL0C02277g	GLN3		0.964986
2677	3319	3990	3850	4500	4542	-	CAGL0H10472g	CAGL0H10472g		0.964912
648	919	425	410	518	682	-	CAGL0J07348g	CAGL0J07348g		0.964706
1751	2093	368	355	748	1071	-	CAGL0E06644g	EPA1		0.964674
5583	6583	2260	2180	4612	4208	-	CAGL0G03597g	CAGL0G03597g		0.964602
2634	3467	5679	5476	6753	6739	-	CAGL0D04136g	CAGL0D04136g		0.964254
15540	17827	71799	69211	107709	96384	-	CAGL0I05874g	CAGL0I05874g		0.963955
5824	7253	3493	3366	5551	3999	-	CAGL0C03652g	CAGL0C03652g		0.963642
3393	4436	2427	2338	4758	4166	-	CAGL0B01188g	CAGL0B01188g		0.963329
7112	9493	5816	5599	7287	6495	-	CAGL0H04697g	CAGL0H04697g		0.962689
508190	620035	55353	53285	141158	82828	-	CAGL0B04257g	CAGL0B04257g		0.96264
8081	9845	5722	5508	10108	8749	-	CAGL0G00726g	RFA1		0.9626
1805	2205	2565	2468	3047	2934	-	CAGL0F05775g	CAGL0F05775g		0.962183
3470	4482	1803	1734	3273	2451	-	CAGL0K00693g	CAGL0K00693g		0.96173
171748	194559	19951	19184	51391	31296	-	CAGL0H04521g	CAGL0H04521g		0.961556
2273	2562	2078	1998	2617	2244	-	CAGL0M06699g	CAGL0M06699g		0.961501
893	1208	778	748	894	891	-	CAGL0L09823g	CAGL0L09823g		0.96144
4472	5782	3344	3215	4104	3850	-	CAGL0I08437g	CAGL0I08437g		0.961423
1749	2429	1641	1577	1998	2134	-	CAGL0L05280g	CAGL0L05280g		0.960999
687	833	660	634	670	618	-	CAGL0F06963g	CAGL0F06963g		0.960606
7096	8853	42662	40964	47251	47361	-	CAGL0B00946g	CAGL0B00946g		0.960199
3032	3555	3484	3345	4134	3312	-	CAGL0G00550g	CAGL0G00550g		0.960103
858	1192	1585	1520	2193	1843	-	CAGL0H09174g	PEX1		0.958991
3306	4056	3207	3075	7300	5846	-	CAGL0M07942g	CAGL0M07942g		0.95884
2607	3230	3101	2973	5440	4290	-	CAGL0M02101g	CAGL0M02101g		0.958723
4923	6829	9852	9445	10237	11371	-	CAGL0I07821g	CAGL0I07821g		0.958689
595	688	2954	2831	3203	2683	-	CAGL0D02134g	CAGL0D02134g		0.958362
12	24	24	23	25	15	-	CAGL0G03993g	CAGL0G03993g		0.958333
337	375	444	425	554	473	-	CAGL0H07315g	CAGL0H07315g		0.957207
6004	6905	5929	5673	12284	10899	-	CAGL0H09218g	SDT1		0.956822
7400	8234	2611	2498	4810	4936	-	CAGL0G00924g	GLM5		0.956722
3760	4621	7165	6854	7812	7203	-	CAGL0F08987g	CAGL0F08987g		0.956595
5486	6275	2697	2579	4775	3724	-	CAGL0D03146g	CAGL0D03146g		0.956248
5108	6708	8357	7983	11044	8218	-	CAGL0C01551g	CAGL0C01551g		0.955247
59427	76952	128733	122932	135120	125313	-	CAGL0B03685g	CAGL0B03685g		0.954938
7511	8637	15043	14362	16010	13625	-	CAGL0K07744g	CAGL0K07744g		0.95473
2981	4769	3834	3660	5951	4303	-	CAGL0C04455g	ATP16		0.954617
1670	1895	2203	2103	3061	2660	-	CAGL0F07161g	CAGL0F07161g		0.954607
6482	8004	1541	1471	3735	2852	-	CAGL0A04213g	CAGL0A04213g		0.954575
605	770	880	840	838	749	-	CAGL0M02365g	CAGL0M02365g		0.954545
220	277	1577	1504	1822	1362	-	CAGL0M03465g	CAGL0M03465g		0.95371
4138	5044	11113	10597	13445	14279	-	CAGL0I05896g	YAK1		0.953568
34985	41435	14753	14065	24432	20056	-	CAGL0H10604g	PUB1		0.953365
599	777	530	505	692	567	-	CAGL0F06259g	CAGL0F06259g		0.95283
1867	2662	6850	6526	6160	6053	-	CAGL0M13101g	CAGL0M13101g		0.952701
2572	3094	1600	1524	1957	1894	-	CAGL0E05434g	CAGL0E05434g		0.9525
19438	21579	2375	2262	6219	4903	-	CAGL0M02805g	CAGL0M02805g		0.952421
3256	3661	3718	3541	5689	4478	-	CAGL0G01320g	CAGL0G01320g		0.952394
3185	4371	13503	12860	14861	13536	-	CAGL0L07744g	CAGL0L07744g		0.952381
3459	4236	20794	19793	19307	20546	-	CAGL0L03938g	CAGL0L03938g		0.951861
1310	1704	1161	1105	1792	1458	-	CAGL0D02926g	CAGL0D02926g		0.951766
1047	1329	1200	1142	1573	1487	-	CAGL0I07095g	CAGL0I07095g		0.951667
1461	1789	1358	1292	1590	1616	-	CAGL0G06930g	CAGL0G06930g		0.951399
1412	1428	329	313	523	462	-	CAGL0G04983g	CAGL0G04983g		0.951368
2527	3376	2276	2165	3044	3071	-	CAGL0J06160g	CAGL0J06160g		0.95123
24299	30182	20761	19740	30694	21802	-	CAGL0B03773g	CAGL0B03773g		0.950821
521	748	752	715	1269	1153	-	CAGL0A01193g	CAGL0A01193g		0.950798
986	1272	819	778	1185	788	-	CAGL0J02794g	CAGL0J02794g		0.949939
514	584	3255	3092	4008	3872	-	CAGL0M12474g	CAGL0M12474g		0.949923
1001	1122	2573	2443	3325	3297	-	CAGL0J09284g	CAGL0J09284g		0.949475
9676	12330	19898	18883	16960	17008	-	CAGL0I10516g	CAGL0I10516g		0.94899
484	717	547	519	847	822	-	CAGL0E05720g	CAGL0E05720g		0.948812
13287	16579	6857	6506	10906	12370	-	CAGL0M08448g	CAGL0M08448g		0.948811
14980	20082	81861	77664	79746	67929	-	CAGL0J07612g	ZWF1		0.94873
17	29	39	37	48	28	-	CAGL0A01892g	CAGL0A01892g		0.948718
7909	10065	3410	3235	5303	4314	-	CAGL0H05929g	CAGL0H05929g		0.94868
5370	5546	3328	3157	3114	2608	-	CAGL0I04328g	CAGL0I04328g		0.948618
10420	13825	14034	13309	13185	12835	-	CAGL0G04037g	CAGL0G04037g		0.94834
7962	10544	17482	16568	21193	17034	-	CAGL0H07007g	CAGL0H07007g		0.947718
4735	5710	2542	2405	3304	2879	-	CAGL0G02277g	CAGL0G02277g		0.946105
16374	18205	26617	25179	20591	16200	-	CAGL0F08503g	CAGL0F08503g		0.945974
8141	10359	12050	11393	14943	13807	-	CAGL0I00572g	CAGL0I00572g		0.945477
7194	7856	1999	1889	4014	3584	-	CAGL0G02761g	CAGL0G02761g		0.944972
5158	5812	1358	1283	2510	2139	-	CAGL0A01958g	CAGL0A01958g		0.944772
22475	27517	43973	41531	59581	54617	-	CAGL0L06798g	CAGL0L06798g		0.944466
1565	1913	1060	1001	1386	1220	-	CAGL0K11132g	CAGL0K11132g		0.94434
1781	2261	1628	1537	2068	2265	-	CAGL0L03454g	CAGL0L03454g		0.944103
10399	12919	17767	16769	18916	18789	-	CAGL0J06380g	CAGL0J06380g		0.943828
31069	39258	14572	13753	12281	11260	-	CAGL0K08338g	CAGL0K08338g		0.943796
4280	5075	1594	1504	2976	2644	-	CAGL0J06512g	CAGL0J06512g		0.943538
593	741	3873	3654	4813	4132	-	CAGL0L11902g	CAGL0L11902g		0.943455
87	122	53	50	67	82	-	CAGL0G07557g	CAGL0G07557g		0.943396
2318	2896	1094	1032	2311	2286	-	CAGL0L11198g	CAGL0L11198g		0.943327
12216	14484	16016	15103	18688	16891	-	CAGL0A02629g	CAGL0A02629g		0.942995
3627	4629	1084	1022	2279	1805	-	CAGL0H02431g	CAGL0H02431g		0.942804
1302	1789	2580	2431	4877	3370	-	CAGL0I09746g	CAGL0I09746g		0.942248
2509	3175	2688	2532	4410	3665	-	CAGL0B01903g	CAGL0B01903g		0.941964
516	604	481	453	464	594	-	CAGL0H08217g	CAGL0H08217g		0.941788
2613	3170	2009	1892	2392	2187	-	CAGL0G00396g	CAGL0G00396g		0.941762
1406	1717	9282	8741	10063	9943	-	CAGL0H10120g	CAGL0H10120g		0.941715
5688	6231	600	565	1334	1267	-	CAGL0L05500g	CAGL0L05500g		0.941667
15398	19573	22682	21351	52467	53191	-	CAGL0F01793g	ERG3		0.941319
6	7	17	16	16	11	-	CAGL0G09647g	CAGL0G09647g		0.941176
33714	36627	4532	4264	21152	14051	-	CAGL0F00407g	CAGL0F00407g		0.940865
15882	18358	1352	1272	3901	2982	-	CAGL0K09284g	CAGL0K09284g		0.940828
3190	3977	6317	5943	7803	7830	-	CAGL0D02266g	CAGL0D02266g		0.940795
5009	6894	16612	15624	19046	16328	-	CAGL0J03806g	CAGL0J03806g		0.940525
14830	15721	1865	1754	4459	3289	-	CAGL0J09614g	CAGL0J09614g		0.940483
7512	10132	6170	5801	7264	6039	-	CAGL0B04807g	CAGL0B04807g		0.940194
2990	3502	10646	10009	10988	10734	-	CAGL0L02717g	CAGL0L02717g		0.940165
1267	1560	518	487	868	714	-	CAGL0K09438g	CAGL0K09438g		0.940154
1489	1720	2252	2117	3055	2732	-	CAGL0E01089g	CAGL0E01089g		0.940053
1233	1868	1416	1331	1862	1591	-	CAGL0K08690g	CAGL0K08690g		0.939972
472	527	347	326	483	612	-	CAGL0K09680g	CAGL0K09680g		0.939481
244717	301911	229375	215475	482586	311625	-	CAGL0L07722g	PGK1		0.939401
1391	1558	6879	6462	5858	7685	-	CAGL0B02882g	BMT2		0.939381
2390	2952	3792	3562	4543	4392	-	CAGL0B02673g	CAGL0B02673g		0.939346
66856	79964	21090	19806	29322	23774	-	CAGL0G03311g	CAGL0G03311g		0.939118
2132	2589	1031	968	1528	1275	-	CAGL0E01903g	CAGL0E01903g		0.938894
11649	13468	2323	2180	4662	4012	-	CAGL0L02849g	CAGL0L02849g		0.938442
2034	2302	828	777	1425	1238	-	CAGL0M05885g	CAGL0M05885g		0.938406
22536	25426	4505	4227	11015	8036	-	CAGL0H07249g	DYS1		0.938291
4533	6043	5588	5240	5055	4300	-	CAGL0I04334g	CAGL0I04334g		0.937724
1898	1905	1057	991	1342	1203	-	CAGL0K05115g	CAGL0K05115g		0.937559
142188	161297	19085	17883	40283	26472	-	CAGL0M06303g	CAGL0M06303g		0.937019
2521	3504	2680	2511	3817	3101	-	CAGL0J05258g	CAGL0J05258g		0.93694
1236	1358	1028	963	1287	1192	-	CAGL0J06292g	CAGL0J06292g		0.93677
12705	15059	12488	11696	22072	16635	-	CAGL0K01683g	GPD1		0.936579
15047	18400	4287	4015	6003	2971	-	CAGL0K04587g	CAGL0K04587g		0.936552
486	510	126	118	203	145	-	CAGL0D05236g	CAGL0D05236g		0.936508
1732	1860	486	455	704	698	-	CAGL0C03355g	CAGL0C03355g		0.936214
4149	4720	8795	8234	10559	9958	-	CAGL0H00979g	CAGL0H00979g		0.936214
28141	31871	7302	6834	14292	11537	-	CAGL0C03630g	CAGL0C03630g		0.935908
29886	34666	8124	7600	15198	11544	-	CAGL0K02541g	CAGL0K02541g		0.9355
93206	104559	11787	11026	27102	14912	-	CAGL0M12408g	CAGL0M12408g		0.935437
4861	6161	8101	7577	10242	8071	-	CAGL0C02013g	CAGL0C02013g		0.935317
4402	5031	2347	2195	4287	3632	-	CAGL0M13959g	CAGL0M13959g		0.935236
35114	45044	22237	20794	35437	30744	-	CAGL0L12364g	CAGL0L12364g		0.935108
776	957	5131	4797	3521	4153	-	CAGL0J09262g	CAGL0J09262g		0.934905
26002	34298	7296	6821	14665	11282	-	CAGL0G07469g	CAGL0G07469g		0.934896
1607	2411	4942	4619	5047	4618	-	CAGL0L03135g	CAGL0L03135g		0.934642
3474	4751	12396	11582	14110	12378	-	CAGL0K05137g	CAGL0K05137g		0.934334
2940	3264	2158	2016	3316	3076	-	CAGL0A04543g	CAGL0A04543g		0.934198
6786	8680	11753	10979	13010	12188	-	CAGL0I10296g	CAGL0I10296g		0.934144
18055	21899	24301	22700	31160	30830	-	CAGL0G02211g	CAGL0G02211g		0.934118
1914	2443	683	638	1359	1213	-	CAGL0K02453g	CAGL0K02453g		0.934114
9395	12000	11865	11083	14609	12356	-	CAGL0M08712g	CAGL0M08712g		0.934092
1944	2300	1486	1388	2250	2155	-	CAGL0L10956g	CAGL0L10956g		0.934051
1927	2707	3182	2971	4474	3775	-	CAGL0E00891g	CAGL0E00891g		0.93369
7590	9029	11664	10887	11863	11557	-	CAGL0L06182g	CAGL0L06182g		0.933385
210	271	135	126	157	142	-	CAGL0G02871g	CAGL0G02871g		0.933333
2815	3803	1559	1455	3302	2851	-	CAGL0F02079g	CAGL0F02079g		0.933291
3349	4463	4954	4623	5989	5063	-	CAGL0M06259g	CAGL0M06259g		0.933185
4001	4962	4141	3864	3774	3896	-	CAGL0H01815g	CBF1		0.933108
37084	47406	37647	35128	55775	56040	-	CAGL0M07656g	ERG5		0.933089
2413	3350	3165	2952	3185	3349	-	CAGL0K02299g	CAGL0K02299g		0.932701
12053	12429	1407	1312	3573	2825	-	CAGL0D02706g	CAGL0D02706g		0.93248
1031	1188	680	634	821	867	-	CAGL0L02409g	CAGL0L02409g		0.932353
1380	1951	15134	14099	15005	14981	-	CAGL0B01100g	CAGL0B01100g		0.931611
2382	2884	2280	2124	2778	2701	-	CAGL0A04389g	CAGL0A04389g		0.931579
13304	18060	16430	15305	17405	15963	-	CAGL0C03608g	CAGL0C03608g		0.931528
3727	4952	15367	14313	14093	11996	-	CAGL0C01793g	CAGL0C01793g		0.931411
6814	7570	13167	12263	11771	11622	-	CAGL0L10142g	RSB1		0.931344
1344	1921	2954	2751	3622	3036	-	CAGL0L12474g	PHO85		0.93128
23294	26331	9406	8756	15053	12759	-	CAGL0A04125g	CAGL0A04125g		0.930895
549	637	1443	1343	1583	1526	-	CAGL0D02420g	CAGL0D02420g		0.9307
3911	4749	5498	5116	6288	6113	-	CAGL0G05225g	DOS1		0.93052
4724	6698	3654	3399	4976	4269	-	CAGL0F03663g	CAGL0F03663g		0.930213
5599	7110	30471	28339	31583	28612	-	CAGL0M10439g	CAGL0M10439g		0.930032
1010	1358	1011	940	1393	1281	-	CAGL0I08811g	CAGL0I08811g		0.929773
1956	2157	1850	1720	2579	2258	-	CAGL0J02860g	CAGL0J02860g		0.92973
390	432	185	172	299	297	-	CAGL0E00363g	CAGL0E00363g		0.92973
233	196	523	486	609	536	-	CAGL0E03498g	CAGL0E03498g		0.929254
3793	4897	7193	6684	8261	7642	-	CAGL0C01815g	CAGL0C01815g		0.929237
425	442	1939	1801	1808	1616	-	CAGL0K05247g	CAGL0K05247g		0.928829
1972	2434	3707	3442	4054	3480	-	CAGL0J00825g	CAGL0J00825g		0.928514
2140	2799	10555	9798	11958	11927	-	CAGL0K04719g	CAGL0K04719g		0.92828
23311	29688	16673	15475	28329	20999	-	CAGL0M06457g	CAGL0M06457g		0.928147
829	978	528	490	720	600	-	CAGL0F01903g	CAGL0F01903g		0.92803
6855	8488	41281	38310	45450	39196	-	CAGL0L10582g	CAGL0L10582g		0.92803
1726	2071	1678	1557	1757	1988	-	CAGL0C04169g	CAGL0C04169g		0.92789
3924	4504	5422	5031	7004	6736	-	CAGL0D03696g	CAGL0D03696g		0.927886
2362	3085	1941	1801	2245	1995	-	CAGL0I09328g	CAGL0I09328g		0.927872
2995	3508	15709	14570	20206	19328	-	CAGL0H08888g	CAGL0H08888g		0.927494
2146	2734	1979	1835	2598	1980	-	CAGL0D06270g	CAGL0D06270g		0.927236
1665	2082	628	582	919	867	-	CAGL0A03971g	CAGL0A03971g		0.926752
935	1114	1034	958	1453	1274	-	CAGL0E02189g	CAGL0E02189g		0.926499
5421	6649	8155	7555	9354	8861	-	CAGL0I05786g	CAGL0I05786g		0.926426
12092	15899	7664	7100	16174	12098	-	CAGL0M02629g	CAGL0M02629g		0.926409
104611	132781	119976	111105	192309	175421	-	CAGL0C02189g	SAH1		0.92606
779	966	2150	1991	2237	2535	-	CAGL0L09999g	CAGL0L09999g		0.926047
3485	4077	5505	5097	9646	7672	-	CAGL0F03003g	CAGL0F03003g		0.925886
889	1208	1550	1435	1860	1846	-	CAGL0A02475g	CAGL0A02475g		0.925806
13083	14361	1315	1217	3106	2694	-	CAGL0J00473g	CAGL0J00473g		0.925475
1623	1970	2656	2458	2640	2749	-	CAGL0K11363g	CAGL0K11363g		0.925452
601	710	1462	1352	2035	1489	-	CAGL0A00737g	CAGL0A00737g		0.924761
17974	22388	22384	20697	29684	26171	-	CAGL0H09108g	CAGL0H09108g		0.924634
10305	12674	10812	9996	14123	10955	-	CAGL0A04785g	RTG2		0.924528
4247	5799	4993	4616	7161	6139	-	CAGL0L04576g	CAGL0L04576g		0.924494
1116	1375	3922	3625	5243	4787	-	CAGL0M05467g	CAGL0M05467g		0.924273
1053	1511	2052	1896	2378	1990	-	CAGL0I09262g	CAGL0I09262g		0.923977
1206	1453	1955	1806	2670	2097	-	CAGL0F03047g	CAGL0F03047g		0.923785
48012	59333	122752	113377	117932	118243	-	CAGL0L08448g	CAGL0L08448g		0.923626
4628	5024	2485	2295	3892	3374	-	CAGL0K09020g	CAGL0K09020g		0.923541
6681	7709	13553	12516	14079	14694	-	CAGL0L06820g	CAGL0L06820g		0.923486
4256	5144	1502	1387	2903	2036	-	CAGL0J03894g	CAGL0J03894g		0.923435
4147	4921	2590	2391	3397	2964	-	CAGL0D05610g	CAGL0D05610g		0.923166
36825	50339	94474	87214	123376	102300	-	CAGL0J09900g	CAGL0J09900g		0.923153
4633	6157	3463	3196	4634	4106	-	CAGL0L11550g	CAGL0L11550g		0.922899
4649	5818	10497	9687	12891	11500	-	CAGL0G01716g	CAGL0G01716g		0.922835
811	832	334	308	584	621	-	CAGL0F06435g	CAGL0F06435g		0.922156
1197	1647	5895	5434	5895	6216	-	CAGL0F06325g	CAGL0F06325g		0.921798
3005	3875	11329	10443	13797	11510	-	CAGL0H01611g	CAGL0H01611g		0.921794
3246	3828	1147	1057	1963	1572	-	CAGL0J05786g	CAGL0J05786g		0.921534
356	445	458	422	389	421	-	CAGL0C05335g	CAGL0C05335g		0.921397
49675	56708	25297	23305	37073	29044	-	CAGL0I07051g	CAGL0I07051g		0.921255
5536	6850	13955	12853	15626	14535	-	CAGL0G06072g	CAGL0G06072g		0.921032
635	872	1074	989	1007	1007	-	CAGL0F07447g	CAGL0F07447g		0.920857
1796	2183	1844	1698	2171	2054	-	CAGL0K11198g	CAGL0K11198g		0.920824
28717	35961	45801	42165	50812	44931	-	CAGL0D01892g	CAGL0D01892g		0.920613
951	1499	1254	1154	1614	1309	-	CAGL0I06138g	CAGL0I06138g		0.920255
5485	6074	5291	4869	9383	9456	-	CAGL0L06666g	CAGL0L06666g		0.920242
1734	2160	7063	6499	8476	8435	-	CAGL0I10054g	CAGL0I10054g		0.920147
2056	2927	3129	2879	3634	3486	-	CAGL0B02365g	CAGL0B02365g		0.920102
48197	63761	84246	77512	96252	84228	-	CAGL0C01325g	CAGL0C01325g		0.920067
4131	5341	6246	5746	9245	7726	-	CAGL0C01507g	CAGL0C01507g		0.919949
1556	1856	2935	2700	3281	3137	-	CAGL0D03102g	CAGL0D03102g		0.919932
12487	14696	28863	26551	24727	21260	-	CAGL0I01298g	CAGL0I01298g		0.919897
1104	1255	908	835	1509	1284	-	CAGL0K10142g	CAGL0K10142g		0.919604
1709	2040	547	503	891	761	-	CAGL0I09900g	CAGL0I09900g		0.919561
1615	2279	2290	2104	2256	2381	-	CAGL0K07315g	CAGL0K07315g		0.918777
338	489	2197	2018	3413	2364	-	CAGL0J03058g	CAGL0J03058g		0.918525
4478	4926	1553	1426	2743	2436	-	CAGL0G03113g	CAGL0G03113g		0.918223
1731	2061	1087	998	1467	1218	-	CAGL0E01045g	CAGL0E01045g		0.918123
5779	6831	2196	2016	4221	3871	-	CAGL0C00759g	CAGL0C00759g		0.918033
439924	518556	49451	45393	113061	60546	-	CAGL0F07073g	CAGL0F07073g		0.917939
22231	28052	27301	25059	29647	26314	-	CAGL0H02491g	CAGL0H02491g		0.917878
6179	7911	17376	15948	19251	19410	-	CAGL0C00539g	CAGL0C00539g		0.917818
14488	17006	6811	6249	10506	9358	-	CAGL0L05676g	CAGL0L05676g		0.917486
1619	1730	2294	2104	2643	2531	-	CAGL0K04323g	CAGL0K04323g		0.917175
1121	1526	83581	76653	89423	76806	-	CAGL0J04004g	CAGL0J04004g		0.91711
272104	306820	73391	67304	120384	86973	-	CAGL0L12870g	CAGL0L12870g		0.917061
980	1156	1085	995	1592	1837	-	CAGL0F01815g	CAGL0F01815g		0.917051
7184	8838	11659	10691	16162	14299	-	CAGL0F01265g	YAP7		0.916974
11215	16935	7309	6702	10543	8273	-	CAGL0C02211g	UTR2		0.916952
748	924	7378	6765	7826	7340	-	CAGL0L12012g	CAGL0L12012g		0.916915
110	166	337	309	337	412	-	CAGL0H07601g	CAGL0H07601g		0.916914
14516	18005	9427	8643	10698	8725	-	CAGL0H00220g	CAGL0H00220g		0.916835
2	4	12	11	7	12	-	CAGL0D05456g	CAGL0D05456g		0.916667
2387	2940	1608	1474	2731	2009	-	CAGL0H01595g	CAGL0H01595g		0.916667
1676	2044	612	561	1035	762	-	CAGL0L09779g	CAGL0L09779g		0.916667
3756	5178	3105	2845	4265	3412	-	CAGL0H03839g	CAGL0H03839g		0.916264
5575	6818	17842	16341	17153	16524	-	CAGL0M03157g	CAGL0M03157g		0.915873
24417	30779	43098	39469	58719	46401	-	CAGL0M11704g	AHP1		0.915797
885	1264	1183	1083	1560	1337	-	CAGL0M09273g	CAGL0M09273g		0.915469
5742	6902	7760	7104	7799	7290	-	CAGL0D05852g	CAGL0D05852g		0.915464
3159	3734	10989	10060	12563	11280	-	CAGL0M07205g	CAGL0M07205g		0.915461
2722	3666	1382	1265	2245	1885	-	CAGL0E01595g	CAGL0E01595g		0.91534
2611	3185	5101	4669	5302	5642	-	CAGL0K07876g	CAGL0K07876g		0.915311
1804	2230	3707	3393	4807	4053	-	CAGL0K11209g	PEX5		0.915295
2253	2571	6584	6025	7787	8039	-	CAGL0J09020g	CAGL0J09020g		0.915097
8270	11312	7777	7116	9004	8028	-	CAGL0G07491g	CAGL0G07491g		0.915006
46489	48214	7262	6644	15556	12727	-	CAGL0G00154g	CAGL0G00154g		0.914899
4631	5370	3923	3589	5075	4199	-	CAGL0E03806g	CAGL0E03806g		0.914861
4170	4625	1123	1027	1526	1644	-	CAGL0J02222g	CAGL0J02222g		0.914515
8675	11119	12257	11207	17890	15289	-	CAGL0I02970g	CAGL0I02970g		0.914335
3145	3557	1119	1023	1664	1487	-	CAGL0K05555g	CAGL0K05555g		0.914209
1267	1580	5829	5328	4565	4986	-	CAGL0J08613g	CAGL0J08613g		0.91405
3714	4528	756	691	1594	1315	-	CAGL0H07183g	CAGL0H07183g		0.914021
3207	4492	2577	2355	4513	3502	-	CAGL0G08195g	CAGL0G08195g		0.913853
32109	42354	44997	41081	59333	48909	-	CAGL0L06160g	CAGL0L06160g		0.912972
1579	2087	4365	3984	4116	3849	-	CAGL0M01848g	CAGL0M01848g		0.912715
1620	2088	1154	1053	1738	1694	-	CAGL0G03751g	CAGL0G03751g		0.912478
41182	46587	49452	45105	47299	38731	-	CAGL0F09207g	BAT1		0.912097
2510	3389	42853	39079	44039	38741	-	CAGL0B03817g	CAGL0B03817g		0.911931
8980	10968	26494	24158	27806	26688	-	CAGL0K08030g	CAGL0K08030g		0.911829
1593	1772	1153	1051	2361	2002	-	CAGL0F06149g	CAGL0F06149g		0.911535
20466	22158	2518	2295	6391	4991	-	CAGL0I02926g	CAGL0I02926g		0.911438
1661	1821	406	370	674	546	-	CAGL0K05599g	CAGL0K05599g		0.91133
2026	2814	2737	2494	4313	3304	-	CAGL0K11594g	CAGL0K11594g		0.911217
3537	4284	4614	4203	5184	5129	-	CAGL0A00187g	CAGL0A00187g		0.910923
7185	8854	5500	5008	7199	6208	-	CAGL0J10824g	CAGL0J10824g		0.910545
1574	2144	3821	3479	4011	3496	-	CAGL0F01221g	CAGL0F01221g		0.910495
564	727	736	670	1028	906	-	CAGL0M12661g	CAGL0M12661g		0.910326
52906	64239	21551	19616	46756	34498	-	CAGL0H04081g	ERG13		0.910213
5464	6280	3264	2970	3272	2819	-	CAGL0G01969g	CAGL0G01969g		0.909926
3060	3637	4724	4298	5069	4763	-	CAGL0D04048g	CAGL0D04048g		0.909822
11823	16646	36717	33389	54071	43954	-	CAGL0B02431g	CAGL0B02431g		0.909361
3601	4506	5682	5166	6610	6657	-	CAGL0G04917g	CAGL0G04917g		0.909187
7141	9034	40260	36600	34858	31011	-	CAGL0H02519g	CAGL0H02519g		0.909091
1113	1179	9507	8642	8877	8831	-	CAGL0A00341g	CAGL0A00341g		0.909014
4707	5675	5907	5369	8315	6554	-	CAGL0J08657g	CAGL0J08657g		0.908922
565	788	625	568	892	734	-	CAGL0G00968g	CAGL0G00968g		0.9088
64593	74914	12612	11455	22743	14855	-	CAGL0D05214g	CAGL0D05214g		0.908262
2390	2876	3135	2847	3198	2885	-	CAGL0L11726g	CAGL0L11726g		0.908134
10135	11925	38666	35102	41780	37511	-	CAGL0C03113g	CAGL0C03113g		0.907826
93	133	401	364	232	302	-	CAGL0G05984g	CAGL0G05984g		0.907731
3179	4054	9549	8667	11553	10056	-	CAGL0A00957g	PEX23B		0.907634
7600	9691	7336	6655	7619	7211	-	CAGL0D05478g	CAGL0D05478g		0.90717
7070	8545	3139	2847	3494	3307	-	CAGL0E01771g	YPS5		0.906977
11155	14079	15845	14359	21386	23584	-	CAGL0B02992g	MNT3		0.906216
20540	25208	8006	7254	14045	9777	-	CAGL0J06600g	URA5		0.90607
11029	14158	8895	8059	11981	10103	-	CAGL0B04191g	CAGL0B04191g		0.906015
1524	1863	2050	1857	2809	2492	-	CAGL0B04763g	CAGL0B04763g		0.905854
1573	1939	1306	1183	1389	1324	-	CAGL0M13123g	CAGL0M13123g		0.905819
11591	14463	18750	16983	19689	16891	-	CAGL0G06028g	ARO9		0.90576
23298	30416	34620	31354	47868	40262	-	CAGL0H01397g	CAGL0H01397g		0.905661
8414	10728	5549	5025	7564	6171	-	CAGL0G09955g	CAGL0G09955g		0.905569
7329	8428	2930	2652	4602	3968	-	CAGL0M05159g	CAGL0M05159g		0.905119
2153	2574	2571	2327	3825	3473	-	CAGL0J10208g	CAGL0J10208g		0.905095
11692	15179	16160	14626	22005	18348	-	CAGL0G01804g	CAGL0G01804g		0.905074
777720	968160	697598	631342	1212990	830578	-	CAGL0I02486g	ENO1		0.905023
7335	9139	21516	19471	27233	18744	-	CAGL0J11836g	CAGL0J11836g		0.904954
822	945	284	257	461	302	-	CAGL0K06523g	CAGL0K06523g		0.90493
1367	1879	2480	2244	2402	2354	-	CAGL0J11891g	AWP3		0.904839
4295	4883	5983	5413	6731	6213	-	CAGL0D03234g	CAGL0D03234g		0.90473
17953	20169	3390	3067	7119	6422	-	CAGL0J04928g	CAGL0J04928g		0.90472
1316	1825	2256	2041	2882	2569	-	CAGL0H04499g	CAGL0H04499g		0.904699
11234	12805	3724	3369	6321	4819	-	CAGL0B04961g	CAGL0B04961g		0.904672
4847	6325	5159	4667	6449	5862	-	CAGL0I03740g	CAGL0I03740g		0.904633
2462	2741	4977	4502	5957	5342	-	CAGL0L10208g	CAGL0L10208g		0.904561
23261	25255	3730	3374	7379	5874	-	CAGL0I04730g	HMT1		0.904558
2659	3125	12244	11073	14070	14035	-	CAGL0J04884g	CAGL0J04884g		0.904361
1436	1957	959	867	1504	1204	-	CAGL0B02299g	CAGL0B02299g		0.904067
1377	1543	1699	1536	2259	1865	-	CAGL0H05225g	CAGL0H05225g		0.904061
2014	2522	6302	5697	5865	5205	-	CAGL0K03443g	YKU80		0.903999
4187	5317	6050	5467	6864	6213	-	CAGL0H08503g	CAGL0H08503g		0.903636
21493	22636	4480	4047	6699	6050	-	CAGL0M04829g	CAGL0M04829g		0.903348
4120	5456	2780	2511	4811	4887	-	CAGL0H02805g	CAGL0H02805g		0.903237
6056	7164	5687	5136	4886	4103	-	CAGL0K11902g	CAGL0K11902g		0.903112
8573	12515	13065	11797	17423	13051	-	CAGL0D05170g	PHO4		0.902947
4526	5388	9671	8731	10512	10291	-	CAGL0J02002g	CAGL0J02002g		0.902802
540	757	473	427	677	589	-	CAGL0J00913g	CAGL0J00913g		0.902748
111	90	12212	11024	8296	11894	-	CAGL0M11000g	CAGL0M11000g		0.902719
1454	1661	1068	964	1299	1404	-	CAGL0L05038g	CAGL0L05038g		0.902622
4732	5103	2865	2586	2631	2641	-	CAGL0J07722g	CAGL0J07722g		0.902618
2825	3300	6281	5669	5165	8669	-	CAGL0K10736g	CYB2		0.902563
463	643	82	74	243	243	-	CAGL0J00869g	CAGL0J00869g		0.902439
3197	3758	1729	1560	2824	2282	-	CAGL0C02475g	CAGL0C02475g		0.902256
151536	196074	118598	106991	129871	123158	-	CAGL0I06160g	PIR4		0.902132
5802	5717	1419	1280	1985	1753	-	CAGL0F04103g	CAGL0F04103g		0.902044
42	78	51	46	43	45	-	CAGL0H08910g	CAGL0H08910g		0.901961
4334	5526	7485	6750	8486	8701	-	CAGL0J08635g	CAGL0J08635g		0.901804
3122	4199	1313	1184	3011	2503	-	CAGL0J10978g	CAGL0J10978g		0.901752
44080	51585	50231	45272	39093	28196	-	CAGL0A01430g	TRP5		0.901276
18838	22023	2910	2621	7624	5463	-	CAGL0I05500g	CAGL0I05500g		0.900687
1889	2141	1921	1730	3246	2356	-	CAGL0K04213g	CAGL0K04213g		0.900573
20000	23000	25658	23099	26538	22113	-	CAGL0M12386g	CAGL0M12386g		0.900265
3212	4024	4015	3614	7723	5410	-	CAGL0H08305g	CAGL0H08305g		0.900125
1470	1947	10935	9841	9748	8919	-	CAGL0L00649g	CAGL0L00649g		0.899954
59992	74682	50439	45385	136239	80642	-	CAGL0F08041g	PFK1		0.8998
2790	3408	2683	2414	3287	3264	-	CAGL0H05775g	CAGL0H05775g		0.899739
1606	2124	1333	1199	1555	1558	-	CAGL0G02695g	CAGL0G02695g		0.899475
2910	3363	1874	1685	2190	2370	-	CAGL0D03916g	CAGL0D03916g		0.899146
5171	6144	23931	21517	19559	19036	-	CAGL0L04378g	CAGL0L04378g		0.899127
2732	3341	3609	3244	4074	3724	-	CAGL0J01914g	CAGL0J01914g		0.898864
1475	1594	1206	1084	1617	1808	-	CAGL0B03355g	CAGL0B03355g		0.898839
2778	3279	840	755	1815	1581	-	CAGL0I03630g	CAGL0I03630g		0.89881
1170	1524	859	772	1183	1078	-	CAGL0C02497g	CAGL0C02497g		0.898719
633	733	532	478	674	531	-	CAGL0G04191g	CAGL0G04191g		0.898496
682	909	1328	1193	1474	1419	-	CAGL0I09306g	CAGL0I09306g		0.898343
3923	4623	2829	2541	4046	3254	-	CAGL0I02266g	CAGL0I02266g		0.898197
3755	4381	7606	6831	8092	8159	-	CAGL0J01958g	CAGL0J01958g		0.898107
155	214	205	184	140	146	-	CAGL0K12364g	CAGL0K12364g		0.897561
19069	24883	15893	14262	18133	15265	-	CAGL0F00759g	CAGL0F00759g		0.897376
5265	6904	24725	22187	28022	27064	-	CAGL0D03982g	CAGL0D03982g		0.897351
2365	2756	3443	3089	4111	3699	-	CAGL0J04092g	CAGL0J04092g		0.897183
3977	4775	4473	4013	5517	5095	-	CAGL0M08866g	PEX29		0.897161
59380	76651	54139	48567	66379	59995	-	CAGL0F04565g	CAGL0F04565g		0.89708
1179	1536	621	557	908	659	-	CAGL0D00726g	CAGL0D00726g		0.89694
3063	4056	7011	6286	9821	8000	-	CAGL0D05918g	ATF2		0.896591
3759	4399	1575	1412	2902	2254	-	CAGL0D03454g	CAGL0D03454g		0.896508
529	770	560	502	850	549	-	CAGL0E00605g	CAGL0E00605g		0.896429
1467	2027	1139	1021	1710	1400	-	CAGL0A03883g	CAGL0A03883g		0.8964
1059	1344	992	889	1161	1124	-	CAGL0K07139g	CAGL0K07139g		0.896169
3623	4597	13886	12443	13138	13610	-	CAGL0L08888g	CAGL0L08888g		0.896082
127089	168795	136062	121911	145340	122762	-	CAGL0L06424g	CAGL0L06424g		0.895996
6555	8091	4517	4046	9905	8115	-	CAGL0F04323g	CAGL0F04323g		0.895727
37723	44963	48975	43866	59683	58896	-	CAGL0J00429g	COX6		0.895681
38	44	4246	3803	3348	5360	-	CAGL0G02563g	CAGL0G02563g		0.895667
9495	11635	34282	30702	43293	40785	-	CAGL0D02618g	PEX11		0.895572
1305	1504	4845	4339	3853	4439	-	CAGL0L09493g	CAGL0L09493g		0.895562
1213	1434	1033	925	1393	1147	-	CAGL0I07029g	CAGL0I07029g		0.89545
2807	3537	2765	2475	4701	3764	-	CAGL0H07535g	CAGL0H07535g		0.895118
6305	7556	30071	26917	51280	51334	-	CAGL0L09383g	CAGL0L09383g		0.895115
3982	4795	6024	5391	6823	6696	-	CAGL0I07271g	CAGL0I07271g		0.89492
1517	1889	3348	2996	3322	3238	-	CAGL0J10538g	CAGL0J10538g		0.894863
445	620	570	510	567	442	-	CAGL0F02513g	CAGL0F02513g		0.894737
137	181	313	280	244	316	-	CAGL0L10802g	CAGL0L10802g		0.894569
1552	1781	806	721	1167	1108	-	CAGL0D04796g	CAGL0D04796g		0.894541
56774	65138	182020	162807	228137	181565	-	CAGL0D06688g	ALD4		0.894446
8956	9631	3644	3259	5015	3677	-	CAGL0G05115g	CAGL0G05115g		0.894347
4264	4481	783	700	2262	1885	-	CAGL0L11176g	CAGL0L11176g		0.893997
9145	11792	21409	19138	20264	23199	-	CAGL0K08844g	CAGL0K08844g		0.893923
322632	399941	113958	101860	208389	144677	-	CAGL0A03234g	EFT2		0.893838
6560	7993	8800	7863	9557	9507	-	CAGL0E00913g	CAGL0E00913g		0.893523
3120	3754	1830	1635	2499	2364	-	CAGL0H09526g	CAGL0H09526g		0.893443
522	748	769	687	707	844	-	CAGL0H09394g	CAGL0H09394g		0.893368
1144	1460	1827	1632	2075	1968	-	CAGL0G04543g	CAGL0G04543g		0.893268
2599	2770	1638	1463	2042	1972	-	CAGL0M11594g	CAGL0M11594g		0.893162
6005	7204	2106	1881	3436	2646	-	CAGL0F06501g	CAGL0F06501g		0.893162
16514	17684	89440	79882	39860	49862	-	CAGL0M03245g	CAGL0M03245g		0.893135
2482	3127	1467	1310	2069	1999	-	CAGL0K11770g	CAGL0K11770g		0.892979
44690	50385	8458	7552	14254	10552	-	CAGL0A02189g	CAGL0A02189g		0.892882
604	704	1025	915	1099	912	-	CAGL0F03091g	CAGL0F03091g		0.892683
22064	24621	7699	6872	12897	10826	-	CAGL0D03190g	MEU1		0.892583
9289	12524	19641	17531	16224	15899	-	CAGL0K08162g	CAGL0K08162g		0.892572
556	757	428	382	498	375	-	CAGL0J09988g	CAGL0J09988g		0.892523
4837	5626	9689	8647	11057	10552	-	CAGL0J09130g	CAGL0J09130g		0.892455
77460	93259	23445	20900	34610	19368	-	CAGL0G09713g	CAGL0G09713g		0.891448
4835	6285	2630	2344	4357	3866	-	CAGL0B00330g	CAGL0B00330g		0.891255
28843	31825	41022	36542	65445	54720	-	CAGL0K02145g	CAGL0K02145g		0.89079
4459	6022	7327	6525	9089	7893	-	CAGL0F01199g	CAGL0F01199g		0.890542
9136	12132	4885	4350	7125	6121	-	CAGL0L12452g	CAGL0L12452g		0.890481
1504	1566	785	699	1162	1118	-	CAGL0M02321g	CAGL0M02321g		0.890446
2046	2347	1148	1022	1901	1504	-	CAGL0M00572g	CAGL0M00572g		0.890244
2203	2715	592	527	1051	855	-	CAGL0C00715g	CAGL0C00715g		0.890203
2224	2750	1118	995	1448	1213	-	CAGL0J00935g	CAGL0J00935g		0.889982
5190	6724	12653	11260	12096	11292	-	CAGL0L09933g	CAGL0L09933g		0.889908
14171	18297	7094	6313	12899	11752	-	CAGL0K09130g	CAGL0K09130g		0.889907
8327	10528	11791	10492	15926	17562	-	CAGL0M07315g	CAGL0M07315g		0.889831
1221	1387	3511	3124	7175	5045	-	CAGL0L07766g	CAGL0L07766g		0.889775
1226	1380	2867	2550	2964	3468	-	CAGL0M12947g	PUP1		0.889431
12203	15426	265405	236024	246227	253472	-	CAGL0F04895g	CAGL0F04895g		0.889297
13	13	9	8	4	19	-	CAGL0H04059g	CAGL0H04059g		0.888889
10754	12139	3071	2729	6287	5140	-	CAGL0M00990g	CAGL0M00990g		0.888636
7054	9433	13740	12209	14784	12740	-	CAGL0H04785g	CAGL0H04785g		0.888574
2164	2704	1919	1705	2138	1894	-	CAGL0F01837g	CAGL0F01837g		0.888484
11597	13082	12713	11293	12778	12346	-	CAGL0M01364g	CBF3D		0.888303
1242	1390	1101	978	1491	1413	-	CAGL0I09768g	CAGL0I09768g		0.888283
20971	25472	4927	4376	12216	10436	-	CAGL0D01716g	CAGL0D01716g		0.888167
1263	1420	1269	1127	1392	1452	-	CAGL0L04994g	CAGL0L04994g		0.888101
168223	205489	31129	27645	63623	36407	-	CAGL0G00990g	RPP0		0.888079
8691	11352	17035	15128	19219	14747	-	CAGL0A01111g	CAGL0A01111g		0.888054
3737	4932	3656	3246	4036	3269	-	CAGL0E04400g	CAGL0E04400g		0.887856
5907	6956	16496	14644	15273	13984	-	CAGL0B00814g	CAGL0B00814g		0.88773
1883	2273	2129	1889	2432	2316	-	CAGL0M09295g	CAGL0M09295g		0.887271
1573	1638	2922	2592	3149	3300	-	CAGL0E04708g	CAGL0E04708g		0.887064
1407	1750	1503	1333	1881	1634	-	CAGL0K01881g	CAGL0K01881g		0.886893
4958	5566	8107	7189	9846	9547	-	CAGL0F05687g	CAGL0F05687g		0.886765
2856	3324	2886	2559	4078	3116	-	CAGL0C00341g	CAGL0C00341g		0.886694
6332	9127	14295	12675	15508	14102	-	CAGL0K01749g	CAGL0K01749g		0.886674
19954	24333	12446	11033	16889	11100	-	CAGL0J04114g	CAGL0J04114g		0.88647
805	1110	844	748	1114	1087	-	CAGL0L05896g	CAGL0L05896g		0.886256
3259	3929	4984	4417	6212	5505	-	CAGL0F08063g	CAGL0F08063g		0.886236
418	636	334	296	385	460	-	CAGL0K11319g	CAGL0K11319g		0.886228
2900	3351	2039	1807	2936	2434	-	CAGL0L11704g	CAGL0L11704g		0.886219
23386	30241	32026	28380	23493	15581	-	CAGL0F01463g	TIR1		0.886155
1127	1372	2108	1868	2268	2278	-	CAGL0G07062g	CAGL0G07062g		0.886148
3715	4304	3363	2980	4164	3839	-	CAGL0H08481g	CAGL0H08481g		0.886114
3945	4408	4825	4274	5721	5030	-	CAGL0M08690g	PEX10		0.885803
19698	21690	11172	9891	16312	13727	-	CAGL0L08068g	CAGL0L08068g		0.885338
56861	72633	34268	30335	68976	50256	-	CAGL0G01034g	FKS1		0.885228
3405	3948	4913	4349	5770	4927	-	CAGL0D00594g	CAGL0D00594g		0.885203
3992	4661	1174	1039	2082	1835	-	CAGL0M06941g	CAGL0M06941g		0.885009
9132	12026	16017	14173	16929	15452	-	CAGL0J01419g	CAGL0J01419g		0.884872
71455	83218	13854	12259	25996	19913	-	CAGL0M12991g	CAGL0M12991g		0.884871
1413	1665	2108	1865	2327	2448	-	CAGL0H03421g	CAGL0H03421g		0.884725
3054	3697	2167	1917	3818	3402	-	CAGL0L01749g	CAGL0L01749g		0.884633
3753	4982	4063	3594	5021	4502	-	CAGL0H04631g	AP1		0.884568
724	826	770	681	771	773	-	CAGL0E02057g	CAGL0E02057g		0.884416
21544	26135	29610	26186	34572	30384	-	CAGL0J01699g	CAGL0J01699g		0.884363
2826	3220	2574	2275	3442	2930	-	CAGL0A00605g	CAGL0A00605g		0.883838
5014	6949	4475	3955	6184	5328	-	CAGL0K06655g	CAGL0K06655g		0.883799
14048	19089	89937	79483	90293	76374	-	CAGL0E04356g	CAGL0E04356g		0.883763
6930	9261	20913	18481	26352	22921	-	CAGL0H06699g	CAGL0H06699g		0.883709
5443	7435	8096	7152	9689	8610	-	CAGL0M01650g	CAGL0M01650g		0.883399
12766	15844	21504	18996	24704	20885	-	CAGL0I03938g	PPH21		0.883371
4833	6778	2639	2331	5150	3634	-	CAGL0E05038g	CAGL0E05038g		0.883289
1103	1371	856	756	757	1068	-	CAGL0H00638g	VIK1		0.883178
301679	351617	165531	146183	447802	240135	-	CAGL0H08327g	TPI1		0.883116
9289	10730	1608	1420	3447	2888	-	CAGL0K08360g	CAGL0K08360g		0.883085
3136	3569	965	852	1531	1565	-	CAGL0K01089g	CAGL0K01089g		0.882902
4575	5511	4816	4252	5836	5684	-	CAGL0L02959g	CAGL0L02959g		0.88289
1025	1272	1118	987	1342	1290	-	CAGL0M12573g	CAGL0M12573g		0.882826
13429	15815	7636	6741	17078	12859	-	CAGL0K12980g	BMT7		0.882792
6524	8595	5088	4491	7175	6163	-	CAGL0A01452g	CAGL0A01452g		0.882665
6010	7149	22036	19450	22290	21612	-	CAGL0F06061g	CAGL0F06061g		0.882647
511	608	1141	1007	1232	1021	-	CAGL0J02926g	PET117		0.882559
5885	7474	9235	8149	10989	9773	-	CAGL0G06600g	CAGL0G06600g		0.882404
1780	2081	1437	1268	1924	1779	-	CAGL0B01573g	MTQ2		0.882394
6932	7857	5756	5079	7676	7181	-	CAGL0F06039g	CAGL0F06039g		0.882384
15365	17957	2156	1902	4498	3876	-	CAGL0C01441g	CAGL0C01441g		0.882189
18644	23904	47112	41556	51492	47339	-	CAGL0I07139g	CAGL0I07139g		0.882068
1269	1560	1517	1338	1513	1532	-	CAGL0I09636g	CAGL0I09636g		0.882004
2361	3152	1126	993	1733	1453	-	CAGL0K06391g	CAGL0K06391g		0.881883
10052	10518	2657	2343	6119	4635	-	CAGL0L08206g	CAGL0L08206g		0.881822
2624	3251	2259	1992	3631	3384	-	CAGL0F04763g	CAGL0F04763g		0.881806
1253	1682	1108	977	1189	1002	-	CAGL0L03608g	CAGL0L03608g		0.881769
6542	8235	5938	5235	8794	6527	-	CAGL0K07766g	CAGL0K07766g		0.88161
1042	1192	1068	941	1418	1452	-	CAGL0F05555g	CAGL0F05555g		0.881086
2508	2938	3779	3329	3907	3797	-	CAGL0F00803g	GAL11B		0.880921
153007	180525	23490	20689	50964	29944	-	CAGL0L06886g	CAGL0L06886g		0.880758
6348	7916	13443	11837	15326	14411	-	CAGL0K04939g	CAGL0K04939g		0.880533
30266	40204	49101	43221	71120	59686	-	CAGL0D01958g	CAGL0D01958g		0.880247
2392	2955	3933	3462	4546	3824	-	CAGL0J11528g	CAGL0J11528g		0.880244
449471	499305	70848	62353	135678	86845	-	CAGL0G08173g	CAGL0G08173g		0.880095
2134	2731	1573	1384	1881	1579	-	CAGL0J09636g	CAGL0J09636g		0.879847
33928	41417	31344	27574	26299	28156	-	CAGL0I04092g	CAGL0I04092g		0.879722
4197	4768	3317	2918	3962	3522	-	CAGL0K07051g	CAGL0K07051g		0.879711
10919	12382	12963	11403	15723	12946	-	CAGL0D04774g	CAGL0D04774g		0.879657
6731	9649	16958	14917	19877	15526	-	CAGL0H01309g	CAGL0H01309g		0.879644
25533	32119	34741	30559	51647	43545	-	CAGL0L01727g	CAGL0L01727g		0.879623
4324	5302	3395	2986	4501	3575	-	CAGL0J10956g	CAGL0J10956g		0.879529
282977	337632	38198	33586	95512	52208	-	CAGL0M02849g	CAGL0M02849g		0.879261
9312	12307	16028	14091	21617	17128	-	CAGL0I10472g	CAGL0I10472g		0.879149
6569	7864	4838	4253	5662	5535	-	CAGL0E04972g	CAGL0E04972g		0.879082
4283	6233	5520	4851	8192	5948	-	CAGL0L00627g	CAGL0L00627g		0.878804
17336	21739	29128	25596	40750	30072	-	CAGL0B03509g	CAGL0B03509g		0.878742
5354	7032	4861	4270	6556	5030	-	CAGL0J08349g	CAGL0J08349g		0.87842
3201	3630	5058	4439	5380	5378	-	CAGL0L03179g	CAGL0L03179g		0.87762
4601	5278	1724	1513	3023	2455	-	CAGL0H07425g	CAGL0H07425g		0.87761
900	929	1119	982	909	1038	-	CAGL0E03630g	CAGL0E03630g		0.877569
7367	8133	1633	1433	3402	3019	-	CAGL0M06787g	CAGL0M06787g		0.877526
2926	3531	5493	4819	5793	5536	-	CAGL0M05445g	CAGL0M05445g		0.877298
11471	12804	7387	6479	10671	8648	-	CAGL0G03641g	CAGL0G03641g		0.877081
954	1248	13083	11474	9293	9205	-	CAGL0G02717g	CAGL0G02717g		0.877016
2059	2481	3057	2681	3246	3931	-	CAGL0M06963g	CAGL0M06963g		0.877004
874	1006	439	385	556	479	-	CAGL0M07854g	CAGL0M07854g		0.876993
597	643	455	399	616	505	-	CAGL0K08074g	CAGL0K08074g		0.876923
1548	1762	6367	5583	6749	7368	-	CAGL0G09064g	CAGL0G09064g		0.876865
2365	2748	9047	7931	20796	8914	-	CAGL0L09108g	CAGL0L09108g		0.876644
3361	4385	3023	2650	3876	3455	-	CAGL0L13288g	CAGL0L13288g		0.876613
1471	1726	1456	1276	1710	1636	-	CAGL0K10384g	CAGL0K10384g		0.876374
3810	4669	10496	9198	12016	12200	-	CAGL0M08734g	CAGL0M08734g		0.876334
992	1261	1261	1105	1248	1307	-	CAGL0M10285g	CAGL0M10285g		0.876289
22397	27452	15760	13803	28152	22207	-	CAGL0K09570g	CAGL0K09570g		0.875825
1032	1345	1216	1065	1320	1115	-	CAGL0L13299g	EPA11		0.875822
14714	20034	23110	20234	31248	28659	-	CAGL0M04169g	CAGL0M04169g		0.875552
1859	2501	1156	1012	1463	1705	-	CAGL0A00385g	CAGL0A00385g		0.875433
3798	4826	5778	5058	6299	6171	-	CAGL0D01936g	CAGL0D01936g		0.875389
10559	13309	44332	38791	48576	48454	-	CAGL0K03267g	OPI1		0.875011
1770	2335	1967	1721	2067	2010	-	CAGL0A02838g	CAGL0A02838g		0.874936
1419	1880	1775	1553	2308	1993	-	CAGL0M01540g	CAGL0M01540g		0.87493
75668	84570	10558	9236	21355	12143	-	CAGL0H08734g	CAGL0H08734g		0.874787
3621	4583	3334	2915	4040	3625	-	CAGL0F00913g	CAGL0F00913g		0.874325
2778	3271	2314	2023	2960	2648	-	CAGL0K11341g	CAGL0K11341g		0.874244
2713	3324	2234	1953	2825	2091	-	CAGL0A01001g	CAGL0A01001g		0.874217
4354	4970	1248	1091	2329	2037	-	CAGL0M09757g	CAGL0M09757g		0.874199
20982	21672	1677	1466	3705	2795	-	CAGL0M13519g	CAGL0M13519g		0.87418
19798	26154	42895	37497	67931	61329	-	CAGL0D05940g	ERG1		0.874158
4599	5874	7985	6980	7506	7338	-	CAGL0D01980g	CAGL0D01980g		0.874139
62730	77868	46613	40741	115599	66794	-	CAGL0L10758g	PFK2		0.874027
2287	2676	1841	1609	2229	2059	-	CAGL0D05962g	CAGL0D05962g		0.873982
950	1096	722	631	750	707	-	CAGL0J10560g	CAGL0J10560g		0.873961
15418	19222	8402	7343	12708	9255	-	CAGL0J07260g	CAGL0J07260g		0.873959
1596	2047	2867	2505	2747	2853	-	CAGL0G04609g	PKH2		0.873736
16078	16953	2542	2221	3541	3382	-	CAGL0J08844g	CAGL0J08844g		0.873721
4301	5330	5449	4760	5779	4924	-	CAGL0J06182g	SKO1		0.873555
551	805	482	421	672	728	-	CAGL0G04565g	CAGL0G04565g		0.873444
5206	5792	5507	4809	5849	5580	-	CAGL0D02772g	CAGL0D02772g		0.873252
28611	36339	34618	30230	46806	41793	-	CAGL0H06413g	SSR1		0.873245
2589	3013	4847	4232	6103	5566	-	CAGL0J05874g	CAGL0J05874g		0.873117
3375	4167	2497	2180	2940	2873	-	CAGL0G02299g	CAGL0G02299g		0.873048
9736	11867	5342	4663	10824	8309	-	CAGL0K01793g	CAGL0K01793g		0.872894
3282	4192	4288	3741	5216	4562	-	CAGL0A02486g	CAGL0A02486g		0.872435
876	1074	611	533	722	749	-	CAGL0F09009g	CAGL0F09009g		0.87234
17805	24223	28222	24612	41217	30930	-	CAGL0F01287g	GAS5		0.872086
224	258	297	259	222	190	-	CAGL0L11286g	CAGL0L11286g		0.872054
7957	9745	10672	9303	12140	12126	-	CAGL0K05291g	CAGL0K05291g		0.87172
1370	1819	1083	944	1791	1747	-	CAGL0L05412g	CAGL0L05412g		0.871653
1750	2167	6489	5656	7911	5689	-	CAGL0L08426g	SUE1		0.871629
14869	21000	11502	10025	22047	16676	-	CAGL0H03707g	CAGL0H03707g		0.871588
361	474	350	305	355	455	-	CAGL0F07557g	CAGL0F07557g		0.871429
11762	15434	33067	28812	33033	27705	-	CAGL0L11440g	CAGL0L11440g		0.871322
203265	237346	19193	16718	56211	27914	-	CAGL0A01540g	CAGL0A01540g		0.871047
8509	11403	8921	7770	14628	11263	-	CAGL0K01727g	RPN4		0.870979
1449	1694	2030	1768	2243	2150	-	CAGL0H02343g	CAGL0H02343g		0.870936
48002	55285	16137	14054	21475	16648	-	CAGL0K09328g	THR4		0.870918
6572	9392	16496	14365	16254	13063	-	CAGL0F07535g	CAGL0F07535g		0.870817
133071	162736	58103	50588	113352	102026	-	CAGL0D01034g	VIG9		0.870661
351	465	255	222	203	194	-	CAGL0H04147g	CAGL0H04147g		0.870588
130	223	324	282	294	334	-	CAGL0I00110g	CAGL0I00110g		0.87037
6134	6579	2328	2026	3887	3295	-	CAGL0D05588g	CAGL0D05588g		0.870275
4805	5961	3204	2788	3915	3308	-	CAGL0M10934g	CAGL0M10934g		0.870162
35	36	77	67	77	72	-	CAGL0A00649g	CAGL0A00649g		0.87013
5192	5948	4666	4059	7150	6063	-	CAGL0M03575g	CAGL0M03575g		0.86991
1246	1646	16688	14517	12362	13784	-	CAGL0M04763g	CAGL0M04763g		0.869907
2379	2788	1299	1130	1851	1682	-	CAGL0H02211g	CAGL0H02211g		0.8699
7483	8093	2187	1902	3707	3463	-	CAGL0E02585g	CAGL0E02585g		0.869684
798	1327	329	286	407	519	-	CAGL0J11792g	CAGL0J11792g		0.869301
9706	11059	2410	2095	5954	5365	-	CAGL0K01551g	CAGL0K01551g		0.869295
2871	3570	3633	3158	4362	3539	-	CAGL0M09383g	CAGL0M09383g		0.869254
2336	2825	4134	3593	5357	4827	-	CAGL0J09196g	CAGL0J09196g		0.869134
6053	8035	10814	9398	14014	10857	-	CAGL0M09713g	CAGL0M09713g		0.869059
863	1136	1007	875	935	1103	-	CAGL0L12694g	CAGL0L12694g		0.868918
2355	2967	3764	3270	4621	3766	-	CAGL0A02728g	CAGL0A02728g		0.868757
38035	43749	9746	8465	14864	11503	-	CAGL0K07656g	FRS2		0.868561
24559	27617	5260	4567	9956	8858	-	CAGL0E00781g	CAGL0E00781g		0.868251
287531	327092	36158	31393	81601	51912	-	CAGL0L08118g	CAGL0L08118g		0.868217
10268	13195	12670	11000	14702	13350	-	CAGL0I05170g	CST6		0.868193
158869	188948	18554	16107	41578	24620	-	CAGL0F01045g	CAGL0F01045g		0.868115
44140	56505	38427	33355	51523	43644	-	CAGL0G10131g	CAGL0G10131g		0.868009
1701	2336	2893	2511	3557	2678	-	CAGL0E02761g	CAGL0E02761g		0.867957
3358	4150	2731	2370	3553	2780	-	CAGL0K01331g	CAGL0K01331g		0.867814
2281	2924	1709	1483	2684	2584	-	CAGL0J05500g	CAGL0J05500g		0.867759
99711	122564	32318	28027	43852	32076	-	CAGL0I03322g	CAGL0I03322g		0.867226
6426	8082	8640	7492	8529	7719	-	CAGL0M00528g	CAGL0M00528g		0.86713
42912	52251	27090	23486	33003	25612	-	CAGL0L06908g	CAGL0L06908g		0.866962
4404	5542	2766	2398	3775	3304	-	CAGL0A02552g	CAGL0A02552g		0.866956
3536	4625	932	808	2196	1375	-	CAGL0A01023g	CAGL0A01023g		0.866953
522	596	458	397	608	514	-	CAGL0C02387g	CAGL0C02387g		0.866812
2003	2607	1928	1671	2052	1949	-	CAGL0K07029g	CAGL0K07029g		0.866701
17936	18875	1237	1072	2863	2064	-	CAGL0L03846g	CAGL0L03846g		0.866613
3665	4854	2309	2001	3560	2831	-	CAGL0B01463g	CAGL0B01463g		0.866609
3078	3879	6334	5489	5875	5811	-	CAGL0H00737g	CAGL0H00737g		0.866593
36444	42518	17272	14965	24924	20038	-	CAGL0D01408g	SPE3		0.866431
6150	7334	6461	5598	7859	7720	-	CAGL0F05401g	CAGL0F05401g		0.866429
2889	3751	36047	31225	21341	26827	-	CAGL0H03971g	CAGL0H03971g		0.86623
9233	10035	2189	1896	3838	3374	-	CAGL0K02937g	CAGL0K02937g		0.866149
5852	7424	12004	10397	13301	11007	-	CAGL0A04345g	CAGL0A04345g		0.866128
2265	2829	4039	3498	4549	4502	-	CAGL0J08481g	CAGL0J08481g		0.866056
3284	3989	8231	7128	8120	7200	-	CAGL0C05269g	CAGL0C05269g		0.865994
26444	33457	48266	41789	55393	48011	-	CAGL0F01947g	IRC15		0.865806
272	437	469	406	561	576	-	CAGL0D03872g	CAGL0D03872g		0.865672
20759	25560	22332	19325	27292	20849	-	CAGL0D06556g	CAGL0D06556g		0.86535
709	813	913	790	1140	1108	-	CAGL0K02189g	CAGL0K02189g		0.865279
653	891	1425	1233	2811	2516	-	CAGL0A01089g	CAGL0A01089g		0.865263
72	132	141	122	173	151	-	CAGL0H09592g	CAGL0H09592g		0.865248
24548	26458	1929	1669	6263	4722	-	CAGL0B04125g	CAGL0B04125g		0.865215
3010	3276	1906	1649	2263	2167	-	CAGL0L05060g	CAGL0L05060g		0.865163
4227	4860	5151	4456	5616	5047	-	CAGL0F05445g	CAGL0F05445g		0.865075
11475	12407	1881	1627	3283	2691	-	CAGL0G10043g	CAGL0G10043g		0.864965
1223	1375	5452	4713	5574	5606	-	CAGL0K03575g	CAGL0K03575g		0.864453
4746	6260	4928	4260	6589	5460	-	CAGL0M03553g	CAGL0M03553g		0.864448
5363	6906	2617	2262	3174	2746	-	CAGL0E03520g	CAGL0E03520g		0.864348
14031	16998	42890	37054	50332	39694	-	CAGL0J09306g	CAGL0J09306g		0.863931
7268	8664	5328	4603	6671	5028	-	CAGL0K06303g	CAGL0K06303g		0.863926
4916	6610	4077	3522	5530	4643	-	CAGL0M11396g	CAGL0M11396g		0.86387
1848	2152	1608	1389	1893	1574	-	CAGL0E00693g	CAGL0E00693g		0.863806
2007	2237	1887	1630	2290	2131	-	CAGL0K08052g	CAGL0K08052g		0.863805
204587	235247	28073	24244	58730	34167	-	CAGL0L04840g	CAGL0L04840g		0.863606
6036	6947	3233	2792	4314	3894	-	CAGL0K10010g	CAGL0K10010g		0.863594
633	773	425	367	726	701	-	CAGL0J00517g	CAGL0J00517g		0.863529
3868	4404	13112	11320	14607	15606	-	CAGL0L02827g	CAGL0L02827g		0.863331
2592	3291	2267	1957	2996	2260	-	CAGL0I02816g	CAGL0I02816g		0.863255
234	360	270	233	238	244	-	CAGL0D06578g	CAGL0D06578g		0.862963
211897	238377	12840	11080	37797	21131	-	CAGL0E04994g	CAGL0E04994g		0.862928
34665	44813	32020	27629	39760	34745	-	CAGL0I03190g	RIP1		0.862867
711	961	982	847	1044	1000	-	CAGL0G07183g	CAGL0G07183g		0.862525
3284	3897	4677	4034	5356	4598	-	CAGL0M09405g	CAGL0M09405g		0.862519
5012	5987	3324	2867	4990	4241	-	CAGL0L08822g	CAGL0L08822g		0.862515
14172	16506	9605	8284	12321	10294	-	CAGL0D02178g	CAGL0D02178g		0.862467
1297	1661	1294	1116	1460	1292	-	CAGL0F03487g	CAGL0F03487g		0.862442
3883	4155	1243	1072	2536	1970	-	CAGL0G09317g	CAGL0G09317g		0.86243
4035	5077	8370	7217	9661	8658	-	CAGL0L06358g	CAGL0L06358g		0.862246
1997	2235	6808	5870	5262	5726	-	CAGL0G04829g	CAGL0G04829g		0.862221
812	871	1711	1475	1687	2505	-	CAGL0L03696g	CAGL0L03696g		0.862069
4833	5843	5198	4481	5558	5312	-	CAGL0L08646g	CAGL0L08646g		0.862062
8463	10040	40858	35219	40324	37701	-	CAGL0M13255g	CAGL0M13255g		0.861985
33839	44300	46875	40403	101563	84756	-	CAGL0K04477g	CAGL0K04477g		0.861931
3006	3521	1093	942	1755	1506	-	CAGL0G05852g	CAGL0G05852g		0.861848
6266	8128	24432	21053	28730	27469	-	CAGL0K07524g	PMU1		0.861698
9937	13950	7277	6269	8358	7530	-	CAGL0D01364g	CAGL0D01364g		0.861481
2268	2638	3586	3089	4120	4168	-	CAGL0M11330g	CAGL0M11330g		0.861405
9356	11394	11846	10201	10456	9962	-	CAGL0K06325g	CAGL0K06325g		0.861135
19	15	36	31	37	40	-	CAGL0C01919g	MFA2		0.861111
2402	3096	4278	3683	5312	4830	-	CAGL0M01320g	CAGL0M01320g		0.860916
2011	2219	2847	2451	3211	3048	-	CAGL0G06292g	CAGL0G06292g		0.860906
200	234	424	365	372	449	-	CAGL0J03740g	CAGL0J03740g		0.860849
7306	9361	5452	4693	6573	5587	-	CAGL0L05852g	CAGL0L05852g		0.860785
506	799	567	488	555	512	-	CAGL0I10362g	PWP4		0.86067
4217	4745	3714	3196	4811	4594	-	CAGL0M10747g	CAGL0M10747g		0.860528
1843	2172	1398	1203	1946	1837	-	CAGL0I09416g	CAGL0I09416g		0.860515
869	1211	1254	1079	1339	1336	-	CAGL0A02695g	CAGL0A02695g		0.860447
1874	2163	2207	1899	3663	2815	-	CAGL0L01573g	CAGL0L01573g		0.860444
2698	3629	2472	2127	3738	3553	-	CAGL0E01485g	CAGL0E01485g		0.860437
1794	2051	1225	1054	1387	1122	-	CAGL0J04708g	CAGL0J04708g		0.860408
23180	27266	27194	23394	27979	28339	-	CAGL0J05434g	CAGL0J05434g		0.860263
2514	3187	4587	3946	5482	5058	-	CAGL0J03828g	CAGL0J03828g		0.860257
1262	1322	737	634	835	780	-	CAGL0M07491g	CAGL0M07491g		0.860244
618	812	851	732	867	657	-	CAGL0D02552g	CAGL0D02552g		0.860165
10969	13738	37048	31863	35825	32830	-	CAGL0J08591g	CAGL0J08591g		0.860046
1422	1702	11503	9893	19482	20578	-	CAGL0H04851g	CAGL0H04851g		0.860037
5362	6988	2766	2378	3949	3178	-	CAGL0I03036g	CAGL0I03036g		0.859725
8368	10555	20487	17613	24512	20773	-	CAGL0K01133g	CAGL0K01133g		0.859716
6946	8774	13033	11202	13317	11644	-	CAGL0K04125g	CAGL0K04125g		0.85951
4429	5354	6319	5431	7293	6694	-	CAGL0K06897g	CAGL0K06897g		0.859471
4202	5450	10199	8763	11055	10374	-	CAGL0I01386g	CAGL0I01386g		0.859202
901	1075	1256	1079	1366	1367	-	CAGL0J10098g	CAGL0J10098g		0.859076
4866	5961	4968	4267	6401	5432	-	CAGL0M00198g	CAGL0M00198g		0.858897
4299	5052	3910	3358	6123	5565	-	CAGL0H02871g	CAGL0H02871g		0.858824
41381	51151	80204	68870	107889	97390	-	CAGL0C02321g	PHM8		0.858685
28181	35893	28198	24208	21684	20347	-	CAGL0L02013g	CAGL0L02013g		0.858501
1675	2169	1673	1436	1868	2024	-	CAGL0H02299g	CAGL0H02299g		0.858338
174603	206128	23649	20298	53980	34013	-	CAGL0I00814g	CAGL0I00814g		0.858303
4145	5191	1509	1295	2484	1966	-	CAGL0I01474g	CAGL0I01474g		0.858184
30350	38213	37410	32095	44346	36188	-	CAGL0C02623g	CAGL0C02623g		0.857926
34310	46201	87768	75293	93522	70484	-	CAGL0J00561g	CAGL0J00561g		0.857864
17030	19434	4142	3553	7604	5229	-	CAGL0J04070g	CAGL0J04070g		0.857798
3371	3920	6306	5409	8974	7989	-	CAGL0H09636g	CAGL0H09636g		0.857755
10096	12682	3969	3404	11209	7843	-	CAGL0I01166g	TRR1		0.857647
5771	7846	8505	7294	8305	7917	-	CAGL0L08162g	CAGL0L08162g		0.857613
7869	10800	12103	10379	13602	13384	-	CAGL0C00693g	CAGL0C00693g		0.857556
1279	1391	1542	1322	1832	1611	-	CAGL0L08954g	CAGL0L08954g		0.857328
864	966	3882	3328	3224	3305	-	CAGL0A04675g	CAGL0A04675g		0.85729
1090	1231	974	835	993	985	-	CAGL0L03223g	CAGL0L03223g		0.85729
1082	1403	2627	2252	2974	2611	-	CAGL0L07898g	CAGL0L07898g		0.857252
12633	13729	4401	3772	5733	4473	-	CAGL0I03080g	URA3		0.857078
777014	895874	300355	257375	865563	1066000	-	CAGL0M07920g	PDC		0.856903
5079	5956	4542	3892	5600	5358	-	CAGL0M06017g	CAGL0M06017g		0.856891
1874	2384	844	723	1088	1092	-	CAGL0D04268g	CAGL0D04268g		0.856635
828	1105	2509	2149	2132	2059	-	CAGL0J08976g	CAGL0J08976g		0.856517
1089	1344	906	776	964	936	-	CAGL0D04246g	CAGL0D04246g		0.856512
2511	2997	4462	3821	4546	4500	-	CAGL0J09658g	CAGL0J09658g		0.856342
791	987	480	411	680	686	-	CAGL0L09449g	CAGL0L09449g		0.85625
6234	8194	3311	2835	4980	3917	-	CAGL0H10516g	CAGL0H10516g		0.856237
2025	2331	6635	5681	6799	6769	-	CAGL0M12969g	CAGL0M12969g		0.856217
977	1093	1376	1178	1287	1160	-	CAGL0H06809g	CAGL0H06809g		0.856105
7141	8102	17807	15237	18771	17375	-	CAGL0E06512g	CAGL0E06512g		0.855675
4590	5288	3414	2921	5047	3901	-	CAGL0L08228g	CAGL0L08228g		0.855595
2625	3388	1696	1451	1991	1799	-	CAGL0K05049g	CAGL0K05049g		0.855542
3752	4782	3807	3257	4612	4190	-	CAGL0M08954g	CAGL0M08954g		0.855529
836	907	920	787	1054	1148	-	CAGL0E03894g	FPS2		0.855435
15128	20305	19711	16861	29292	21820	-	CAGL0K11572g	CAGL0K11572g		0.855411
4689	6052	6977	5967	6252	5583	-	CAGL0H01199g	CAGL0H01199g		0.855239
1327	1762	3767	3221	5617	5392	-	CAGL0G02057g	CAGL0G02057g		0.855057
3604	4285	1819	1555	2553	2314	-	CAGL0D02002g	CAGL0D02002g		0.854865
65423	79944	194171	165986	172531	168334	-	CAGL0L08932g	LSP1		0.854844
16486	18394	1715	1466	5114	4048	-	CAGL0M01430g	CAGL0M01430g		0.85481
11581	14301	9595	8201	13391	11392	-	CAGL0E01199g	CAGL0E01199g		0.854716
6529	7320	1906	1629	3219	2808	-	CAGL0F08525g	CAGL0F08525g		0.854669
164076	193918	44799	38288	74181	55836	-	CAGL0I04356g	TIF1		0.854662
2463	2930	3871	3308	4551	4288	-	CAGL0B01144g	CAGL0B01144g		0.85456
1016	1388	763	652	867	920	-	CAGL0K01573g	CAGL0K01573g		0.854522
3133	3786	4364	3727	4836	4138	-	CAGL0H03927g	CAGL0H03927g		0.854033
2303	2758	2322	1983	2749	2687	-	CAGL0H06391g	CAGL0H06391g		0.854005
957	1108	3314	2830	2925	3095	-	CAGL0M08184g	STE3		0.853953
190	186	267	228	368	297	-	CAGL0C03575g	CAGL0C03575g		0.853933
2096	2779	705	602	1094	1049	-	CAGL0G02387g	CAGL0G02387g		0.853901
2596	2915	896	765	1357	1161	-	CAGL0G02535g	CAGL0G02535g		0.853795
72789	87535	74501	63600	82081	82161	-	CAGL0G00220g	CAGL0G00220g		0.85368
3597	4678	6703	5722	7643	6311	-	CAGL0G07315g	CAGL0G07315g		0.853648
5100	5934	2698	2303	3523	3156	-	CAGL0B04147g	CAGL0B04147g		0.853595
3990	4918	2479	2116	2828	2604	-	CAGL0H07227g	CAGL0H07227g		0.85357
1635	1889	2192	1871	2564	2254	-	CAGL0K03003g	CAGL0K03003g		0.853558
1056	1228	7810	6666	6517	7741	-	CAGL0B03311g	CAGL0B03311g		0.853521
35731	42487	23363	19940	31612	25587	-	CAGL0A00363g	CAGL0A00363g		0.853486
1677	2112	2395	2044	1729	1776	-	CAGL0A00165g	CAGL0A00165g		0.853445
283	388	423	361	395	350	-	CAGL0M08624g	CAGL0M08624g		0.853428
7027	8742	2141	1827	3448	2585	-	CAGL0F00627g	CAGL0F00627g		0.85334
399	611	702	599	910	959	-	CAGL0J09702g	CAGL0J09702g		0.853276
3565	3904	354	302	1166	1170	-	CAGL0E00517g	CAGL0E00517g		0.853107
2439	2995	3267	2787	3766	3508	-	CAGL0G04169g	CAGL0G04169g		0.853076
4979	6155	6703	5718	8069	7004	-	CAGL0D03520g	CAGL0D03520g		0.853051
17615	20991	25187	21484	28134	25469	-	CAGL0J10758g	CAGL0J10758g		0.85298
5905	7260	3060	2610	2273	2585	-	CAGL0J03850g	CAGL0J03850g		0.852941
3605	4565	1984	1692	2654	2437	-	CAGL0I02222g	CAGL0I02222g		0.852823
7751	9257	7070	6028	9102	8467	-	CAGL0M13211g	CAGL0M13211g		0.852617
386054	446237	35796	30520	84896	49176	-	CAGL0J07238g	RPS12		0.852609
2747	3494	4859	4142	5162	4385	-	CAGL0D02156g	CAGL0D02156g		0.852439
1191	1504	2087	1779	2933	2459	-	CAGL0I02948g	CAGL0I02948g		0.85242
5113	5968	2336	1991	2594	2373	-	CAGL0G03465g	CAGL0G03465g		0.852312
1202	1275	643	548	665	685	-	CAGL0J11418g	CAGL0J11418g		0.852255
454233	534513	59517	50711	130432	73865	-	CAGL0H08976g	CAGL0H08976g		0.852042
1544	1639	1417	1207	1454	1576	-	CAGL0K03619g	CAGL0K03619g		0.8518
1559	2107	2152	1833	2377	1793	-	CAGL0M07986g	CAGL0M07986g		0.851766
10608	13044	18716	15941	18140	16468	-	CAGL0M10956g	CAGL0M10956g		0.851731
5219	6042	7185	6119	7881	7410	-	CAGL0K04807g	CAGL0K04807g		0.851635
9016	10961	39309	33470	22477	15617	-	CAGL0C05247g	MET22		0.851459
2456	2984	1730	1473	2083	2151	-	CAGL0D06644g	CAGL0D06644g		0.851445
2506	3295	3976	3385	4753	4656	-	CAGL0K04895g	CAGL0K04895g		0.851358
15990	19955	6652	5662	10430	9021	-	CAGL0M01496g	CAGL0M01496g		0.851173
3919	4826	4653	3960	5918	5837	-	CAGL0K09878g	CAGL0K09878g		0.851064
7519	8433	2856	2430	4113	3909	-	CAGL0J07370g	CAGL0J07370g		0.85084
4994	5715	2231	1898	3713	3174	-	CAGL0I02354g	CAGL0I02354g		0.85074
2319	3108	2424	2062	3232	2808	-	CAGL0H10538g	CAGL0H10538g		0.85066
4005	4688	4443	3779	5232	4491	-	CAGL0H06303g	CAGL0H06303g		0.850551
930	1507	1511	1285	1748	1295	-	CAGL0I10098g	PWP7		0.85043
10559	14161	11654	9910	15884	11995	-	CAGL0E05412g	CAGL0E05412g		0.850352
4134	4885	6452	5486	8481	6952	-	CAGL0D04004g	CAGL0D04004g		0.850279
601	779	547	465	660	621	-	CAGL0L02739g	CAGL0L02739g		0.850091
295	510	837	711	694	886	-	CAGL0B04213g	CAGL0B04213g		0.849462
1759	2559	717	609	949	909	-	CAGL0G04653g	CAGL0G04653g		0.849372
826	1170	1009	857	1049	1051	-	CAGL0A01325g	PGD1		0.849356
6422	7999	6549	5562	8001	6269	-	CAGL0A02508g	CAGL0A02508g		0.84929
10014	10990	2366	2009	3916	3634	-	CAGL0J03718g	CAGL0J03718g		0.849112
4046	4910	4406	3741	6167	5037	-	CAGL0H03443g	CAGL0H03443g		0.849069
12191	14372	66849	56754	35871	39070	-	CAGL0M05995g	CAGL0M05995g		0.848988
823	1050	847	719	696	598	-	CAGL0E02123g	CAGL0E02123g		0.848878
117751	136931	21997	18672	48635	24230	-	CAGL0J10384g	CAGL0J10384g		0.848843
2603	3333	15279	12969	15878	15537	-	CAGL0L03982g	CAGL0L03982g		0.848812
3038	4456	5086	4317	6528	5508	-	CAGL0I02860g	CAGL0I02860g		0.848801
2185	2548	4201	3565	4875	4106	-	CAGL0H05951g	CAGL0H05951g		0.848607
4329	4948	6165	5231	6244	5952	-	CAGL0L10472g	CAGL0L10472g		0.8485
24645	30507	30239	25654	33356	28671	-	CAGL0D00748g	CAGL0D00748g		0.848375
12129	14027	2863	2428	5295	4829	-	CAGL0H10406g	CAGL0H10406g		0.848061
6577	7719	3920	3324	5272	3876	-	CAGL0M07876g	MDE1		0.847959
8062	11540	10549	8943	12536	9775	-	CAGL0H07023g	CAGL0H07023g		0.847758
3212	3860	499	423	1304	909	-	CAGL0F01177g	CAGL0F01177g		0.847695
12896	16166	20042	16985	21877	18181	-	CAGL0A03872g	CAGL0A03872g		0.84747
777	1041	1008	854	973	925	-	CAGL0A01408g	CAGL0A01408g		0.847222
4977	5789	4243	3594	4540	4182	-	CAGL0K11374g	CAGL0K11374g		0.847042
2552	3248	4299	3641	4179	4027	-	CAGL0E02695g	CAGL0E02695g		0.846941
7281	9597	6428	5444	6728	6346	-	CAGL0F07997g	CAGL0F07997g		0.84692
2221	2381	5055	4281	4452	4325	-	CAGL0D05318g	CAGL0D05318g		0.846884
3831	4401	1364	1155	2129	1815	-	CAGL0M03091g	CAGL0M03091g		0.846774
30923	36947	37149	31453	39795	35937	-	CAGL0A03542g	COX12		0.846672
2788	3626	8627	7304	7469	6196	-	CAGL0F02717g	PDH1		0.846644
1523	1897	3264	2763	3332	3205	-	CAGL0J07304g	CAGL0J07304g		0.846507
5428	7194	3146	2663	4722	4034	-	CAGL0B03399g	RIF1		0.846472
10440	12448	3284	2779	4062	2926	-	CAGL0H07051g	CAGL0H07051g		0.846224
6	8	13	11	2	10	-	CAGL0J11990g	AWP4		0.846154
8527	10490	3373	2854	5999	4886	-	CAGL0L10120g	CAGL0L10120g		0.846131
40161	45889	36146	30583	43651	35785	-	CAGL0K02079g	GLC7		0.846096
1708	1943	4341	3672	3741	4366	-	CAGL0J04906g	CAGL0J04906g		0.845888
2594	3142	895	757	1530	1155	-	CAGL0C03531g	CAGL0C03531g		0.84581
39340	49906	77704	65711	87438	71661	-	CAGL0L12078g	CAGL0L12078g		0.845658
188	195	570	482	268	340	-	CAGL0H00759g	CAGL0H00759g		0.845614
15233	17912	17105	14463	20548	16325	-	CAGL0I05098g	CAGL0I05098g		0.845542
5964	7156	4892	4136	5480	5052	-	CAGL0F09229g	CAGL0F09229g		0.845462
503	482	291	246	442	417	-	CAGL0M05269g	CAGL0M05269g		0.845361
4834	5456	2838	2398	3839	3137	-	CAGL0J05764g	CAGL0J05764g		0.844961
3784	4538	4676	3951	6218	5035	-	CAGL0M06171g	CAGL0M06171g		0.844953
329	359	554	468	506	396	-	CAGL0H06237g	CAGL0H06237g		0.844765
1137	1308	2228	1882	2323	2110	-	CAGL0H01859g	CAGL0H01859g		0.844704
11180	16081	29641	25037	45035	30607	-	CAGL0A01045g	CAGL0A01045g		0.844675
7391	9233	19811	16731	20304	14275	-	CAGL0H03795g	LEU2		0.844531
6960	8852	7862	6639	8376	7233	-	CAGL0G02035g	CKA2		0.844442
3729	4441	10553	8910	8583	8094	-	CAGL0F09185g	CAGL0F09185g		0.84431
10191	11417	1533	1294	2680	2613	-	CAGL0M07227g	CAGL0M07227g		0.844097
2104	2606	4160	3511	4810	4682	-	CAGL0A03014g	CAGL0A03014g		0.84399
27996	31775	29354	24771	46829	38576	-	CAGL0L05962g	CAGL0L05962g		0.843871
160	337	128	108	164	168	-	CAGL0M04477g	CAGL0M04477g		0.84375
951	1145	1017	858	1581	1445	-	CAGL0B00924g	CAGL0B00924g		0.843658
2310	3030	2251	1899	3117	2798	-	CAGL0D05698g	CAGL0D05698g		0.843625
1649	2044	2084	1758	2601	2550	-	CAGL0L05588g	CAGL0L05588g		0.84357
1463	1519	575	485	1126	960	-	CAGL0G00748g	CAGL0G00748g		0.843478
1413	1673	1124	948	1450	1172	-	CAGL0L07260g	CAGL0L07260g		0.843416
13463	16394	11444	9652	12448	10020	-	CAGL0J11044g	CAGL0J11044g		0.843411
3078	3868	2152	1815	2843	2636	-	CAGL0I06666g	CAGL0I06666g		0.843401
2765	3458	8407	7089	10697	9721	-	CAGL0I04444g	CAGL0I04444g		0.843226
1801	2057	1205	1016	1669	1726	-	CAGL0D04994g	KAR3		0.843154
3824	4550	3397	2864	4196	3739	-	CAGL0G10065g	CAGL0G10065g		0.843097
2509	2974	1551	1307	2160	1665	-	CAGL0M11198g	CAGL0M11198g		0.842682
7971	9400	8319	7010	11674	10857	-	CAGL0J01507g	CAGL0J01507g		0.842649
19275	22964	29309	24693	34852	30605	-	CAGL0F07799g	CAGL0F07799g		0.842506
35594	40249	8815	7426	15198	13123	-	CAGL0M12144g	CAGL0M12144g		0.842428
10201	12930	16650	14026	14622	13150	-	CAGL0L05522g	CAGL0L05522g		0.842402
1963	2398	2270	1912	2005	1873	-	CAGL0G03861g	CAGL0G03861g		0.842291
11188	15681	13699	11537	16622	17429	-	CAGL0C00363g	KRE9		0.842178
14313	17235	14534	12240	18487	17478	-	CAGL0M10769g	CAGL0M10769g		0.842163
38	37	38	32	41	41	-	CAGL0M11044g	CAGL0M11044g		0.842105
19848	22139	2538	2137	5949	5106	-	CAGL0G04411g	CAGL0G04411g		0.842002
190744	213046	38392	32325	66304	41252	-	CAGL0A01562g	CAGL0A01562g		0.841972
1910	2197	4192	3529	4646	4678	-	CAGL0I05808g	CAGL0I05808g		0.841842
2324	3041	5504	4633	5828	5052	-	CAGL0K01199g	CAGL0K01199g		0.841751
2289	2867	998	840	1739	1410	-	CAGL0D02354g	CAGL0D02354g		0.841683
14958	17974	20567	17308	23414	19430	-	CAGL0I08283g	CAGL0I08283g		0.841542
6768	7471	8864	7459	9314	8558	-	CAGL0M08844g	CAGL0M08844g		0.841494
6432	8142	120266	101170	166874	169154	-	CAGL0G03289g	SSA3		0.841219
29296	35158	45747	38455	58590	51497	-	CAGL0A01738g	CAGL0A01738g		0.840602
2313	3178	4149	3487	4685	4323	-	CAGL0G01342g	CAGL0G01342g		0.840443
8577	9306	1829	1537	3148	2885	-	CAGL0I05654g	CAGL0I05654g		0.84035
6090	7266	7961	6689	8428	6865	-	CAGL0M12705g	PHM4		0.840221
1380	1667	1131	950	1288	1261	-	CAGL0F04961g	SMD2		0.839965
3617	4086	3224	2708	3638	3426	-	CAGL0L00363g	CAGL0L00363g		0.83995
1058	1475	1814	1523	2144	1980	-	CAGL0L03762g	CAGL0L03762g		0.839581
12014	13341	2416	2028	4334	3122	-	CAGL0I07799g	CAGL0I07799g		0.839404
784	893	901	756	1001	890	-	CAGL0C01991g	CAGL0C01991g		0.839068
5225	6638	3756	3151	7395	6426	-	CAGL0I07733g	CAGL0I07733g		0.838924
4016	5220	5463	4583	5982	5359	-	CAGL0G04125g	CAGL0G04125g		0.838916
16212	21424	14615	12258	21626	11265	-	CAGL0L01111g	CAGL0L01111g		0.838727
2310	2831	1537	1289	1919	1730	-	CAGL0B02816g	CAGL0B02816g		0.838647
4242	5223	1373	1151	1940	1869	-	CAGL0C01419g	CAGL0C01419g		0.83831
1506	2135	402	337	437	576	-	CAGL0M11066g	CAGL0M11066g		0.838308
6075	7918	12308	10316	14115	11522	-	CAGL0M09427g	CAGL0M09427g		0.838154
888	1221	729	611	989	746	-	CAGL0H02145g	CAGL0H02145g		0.838134
1817	2360	2137	1791	2899	2933	-	CAGL0J09680g	CAGL0J09680g		0.838091
1222	1571	1185	993	1039	804	-	CAGL0A04279g	CAGL0A04279g		0.837975
1052	1110	1900	1592	2118	2007	-	CAGL0L09251g	CAGL0L09251g		0.837895
5915	6473	2276	1907	3812	3282	-	CAGL0C02585g	CAGL0C02585g		0.837873
5546	6752	17583	14730	18968	17273	-	CAGL0J03674g	CAGL0J03674g		0.837741
4208	5751	19303	16169	16030	14753	-	CAGL0I01980g	CAGL0I01980g		0.837642
11003	12631	3199	2679	4962	4142	-	CAGL0D00836g	CAGL0D00836g		0.837449
20430	24448	28937	24233	34361	30702	-	CAGL0A03036g	CAGL0A03036g		0.83744
6352	6998	2030	1700	3653	2555	-	CAGL0E01221g	CAGL0E01221g		0.837438
7465	9590	30528	25563	24330	23778	-	CAGL0B03619g	CAGL0B03619g		0.837362
330132	358257	22795	19087	48678	27269	-	CAGL0K03135g	CAGL0K03135g		0.837333
37756	46667	53894	45124	63492	51027	-	CAGL0I01562g	CAGL0I01562g		0.837273
496	631	516	432	629	622	-	CAGL0L08404g	CAGL0L08404g		0.837209
4810	5659	7973	6674	8290	7595	-	CAGL0M09955g	CAGL0M09955g		0.837075
5624	6400	4996	4181	5328	5550	-	CAGL0G01606g	CAGL0G01606g		0.836869
3611	5143	11284	9443	12269	10851	-	CAGL0G06842g	CAGL0G06842g		0.836849
37776	45358	6208	5194	13795	9544	-	CAGL0K12012g	KRS1		0.836662
656349	803410	374322	313012	980617	550092	-	CAGL0L02497g	FBA1		0.836211
588	842	659	551	805	625	-	CAGL0J01727g	CAGL0J01727g		0.836115
14352	16262	3365	2813	6183	5450	-	CAGL0K03861g	CAGL0K03861g		0.835958
2681	3738	2651	2216	3134	2811	-	CAGL0I02838g	CAGL0I02838g		0.835911
32143	40185	29725	24844	34632	27235	-	CAGL0J08569g	CAGL0J08569g		0.835795
757	885	755	631	716	625	-	CAGL0H07381g	CAGL0H07381g		0.835762
6400	8708	5698	4762	8254	7400	-	CAGL0F01507g	CAGL0F01507g		0.835732
304	437	1546	1292	1440	1172	-	CAGL0L03157g	CAGL0L03157g		0.835705
8490	9490	1972	1648	4589	3910	-	CAGL0K09460g	CAGL0K09460g		0.8357
42746	47005	11704	9780	19986	14780	-	CAGL0K09724g	FPR1		0.835612
46855	58423	94710	79121	101999	84099	-	CAGL0L06270g	BMH1%28B%29		0.835403
44902	50010	17315	14460	25158	18054	-	CAGL0I00594g	CAGL0I00594g		0.835114
211861	253463	27983	23366	63063	35279	-	CAGL0A03168g	CAGL0A03168g		0.835007
23417	29164	51768	43219	65757	52965	-	CAGL0H01529g	CPR5		0.834859
2837	4043	9172	7656	9214	7449	-	CAGL0D01782g	CAGL0D01782g		0.834714
10109	12059	6634	5537	8605	7190	-	CAGL0I08877g	CAGL0I08877g		0.83464
1444	1769	1293	1079	2075	1724	-	CAGL0K03069g	CAGL0K03069g		0.834493
2203	2680	1480	1235	2112	1867	-	CAGL0H08690g	CAGL0H08690g		0.834459
17020	20115	6047	5045	13292	8709	-	CAGL0L09647g	CAGL0L09647g		0.834298
4382	5459	4784	3991	5071	4533	-	CAGL0E01567g	RBX1		0.834239
7218	9584	72037	60081	63378	59687	-	CAGL0G09977g	GDB1		0.83403
3679	4539	1572	1311	2143	1962	-	CAGL0K01045g	CAGL0K01045g		0.833969
2341	2862	1078	899	1563	1453	-	CAGL0H10098g	CAGL0H10098g		0.833952
5825	7987	3462	2887	4907	3654	-	CAGL0J09790g	CAGL0J09790g		0.833911
12440	14898	6330	5278	8489	6963	-	CAGL0I03762g	CAGL0I03762g		0.833807
8747	10028	5654	4714	7495	6262	-	CAGL0L10021g	CAGL0L10021g		0.833746
384	569	1022	852	1144	1576	-	CAGL0M04499g	CAGL0M04499g		0.833659
35463	43668	50673	42228	56969	49823	-	CAGL0L06204g	CAGL0L06204g		0.833343
13	30	120	100	74	82	-	CAGL0A02343g	CAGL0A02343g		0.833333
3	2	12	10	9	13	-	CAGL0G05522g	CAGL0G05522g		0.833333
15	10	12	10	7	7	-	CAGL0I02068g	CAGL0I02068g		0.833333
1128	1351	1247	1039	1446	1222	-	CAGL0J04400g	CAGL0J04400g		0.8332
4266	5139	32056	26705	43494	31318	-	CAGL0B04917g	CAGL0B04917g		0.833073
54699	74063	162383	135275	173241	161780	-	CAGL0H03399g	CAGL0H03399g		0.833061
51151	59602	13174	10973	21757	16029	-	CAGL0E01463g	CDC33		0.832928
35275	41442	4482	3733	9849	6983	-	CAGL0A02090g	CAGL0A02090g		0.832887
3736	4890	8015	6674	9068	7538	-	CAGL0G07337g	CAGL0G07337g		0.832689
5780	6934	7797	6491	8876	8664	-	CAGL0J06094g	CAGL0J06094g		0.8325
17150	21723	17509	14574	22440	18019	-	CAGL0K05093g	CAGL0K05093g		0.832372
2301	3017	1360	1132	1782	1624	-	CAGL0M08382g	CAGL0M08382g		0.832353
36881	45041	34391	28624	41839	38498	-	CAGL0I06270g	CAGL0I06270g		0.832311
62182	76830	41467	34507	53605	44558	-	CAGL0J08734g	CAGL0J08734g		0.832156
1054	1367	815	678	989	868	-	CAGL0G08470g	CAGL0G08470g		0.831902
6925	8679	1725	1435	2726	2307	-	CAGL0K12144g	FES1		0.831884
28251	35016	42092	35015	48053	39666	-	CAGL0K07095g	CAGL0K07095g		0.831868
542	640	1189	989	1085	953	-	CAGL0B03531g	CAGL0B03531g		0.831791
11222	13224	27019	22470	26067	23452	-	CAGL0G07425g	CAGL0G07425g		0.831637
3992	4703	3284	2731	3687	3345	-	CAGL0K11660g	CAGL0K11660g		0.831608
8155	9266	6146	5111	7180	6282	-	CAGL0M06831g	CRZ1		0.831598
2540	3135	1269	1055	1466	1343	-	CAGL0A00825g	CAGL0A00825g		0.831363
3980	4667	3032	2520	3956	3468	-	CAGL0D03300g	CAGL0D03300g		0.831135
1776	2243	811	674	2322	1250	-	CAGL0E01529g	CAGL0E01529g		0.831073
372	634	1603	1332	1367	1527	-	CAGL0A01284g	EPA10		0.830942
3846	4511	2200	1828	2464	2050	-	CAGL0L02189g	CAGL0L02189g		0.830909
654	822	821	682	972	856	-	CAGL0G01848g	CAGL0G01848g		0.830694
26187	32500	33577	27888	44875	38571	-	CAGL0M13629g	CAGL0M13629g		0.830569
6668	8133	1074	892	1903	1592	-	CAGL0B01881g	CAGL0B01881g		0.83054
18613	22821	21743	18058	30450	25755	-	CAGL0L05478g	CAGL0L05478g		0.83052
46537	57179	46034	38231	53727	43015	-	CAGL0A00209g	CAGL0A00209g		0.830495
3172	3733	3307	2746	5591	4438	-	CAGL0J00275g	CAGL0J00275g		0.83036
8023	8222	1608	1335	3233	2931	-	CAGL0F06853g	CAGL0F06853g		0.830224
2617	2690	1107	919	1553	1252	-	CAGL0H06963g	CAGL0H06963g		0.830172
15579	18609	10256	8514	13638	10215	-	CAGL0K00495g	CAGL0K00495g		0.830148
1799	2049	6010	4988	5688	5718	-	CAGL0J07018g	CAGL0J07018g		0.82995
2321	2893	3150	2614	3696	3445	-	CAGL0I07953g	CAGL0I07953g		0.829841
1719	2165	5916	4909	7140	7754	-	CAGL0E06116g	CAGL0E06116g		0.829784
2369	2952	3125	2593	3492	3117	-	CAGL0C01969g	CAGL0C01969g		0.82976
3063	3916	5618	4658	6093	5174	-	CAGL0I07513g	CAGL0I07513g		0.829121
5595	7135	5612	4653	5587	5550	-	CAGL0G03509g	CAGL0G03509g		0.829116
6654	7459	8916	7392	11102	11312	-	CAGL0M06545g	CAGL0M06545g		0.829071
10617	12575	5131	4252	7366	6178	-	CAGL0J03454g	CAGL0J03454g		0.828688
5958	7132	19747	16364	20277	17885	-	CAGL0K01353g	CAGL0K01353g		0.828683
5019	6370	5189	4300	7815	5820	-	CAGL0M08404g	CAGL0M08404g		0.828676
10425	11103	25252	20924	36858	23843	-	CAGL0D04092g	DOG2		0.828608
3818	4891	6549	5426	10308	8699	-	CAGL0H06171g	CAGL0H06171g		0.828523
17123	20782	15022	12446	21841	17469	-	CAGL0G01430g	CAGL0G01430g		0.828518
5681	6461	7184	5950	8602	7460	-	CAGL0K01705g	CAGL0K01705g		0.828229
3270	3603	3919	3245	3569	3582	-	CAGL0D05324g	CAGL0D05324g		0.828017
6388	8647	7545	6247	7452	6710	-	CAGL0B02497g	CAGL0B02497g		0.827966
12360	15254	28779	23826	28159	25377	-	CAGL0I05236g	BCY1		0.827895
3441	3783	30577	25311	25681	27418	-	CAGL0G05698g	CAGL0G05698g		0.827779
5966	7481	2577	2133	3519	2867	-	CAGL0L11770g	CAGL0L11770g		0.827707
441	588	1815	1502	2581	1801	-	CAGL0B04675g	CAGL0B04675g		0.827548
6172	7925	5700	4717	7698	6150	-	CAGL0B01441g	CAGL0B01441g		0.827544
1239	1676	1432	1185	1474	1885	-	CAGL0M11440g	CAGL0M11440g		0.827514
9298	11710	6896	5706	9748	8427	-	CAGL0M09823g	VIP1		0.827436
4493	5632	7610	6295	8285	6987	-	CAGL0I05214g	CAP2		0.827201
2220	2637	2145	1774	2576	2482	-	CAGL0K06985g	CAGL0K06985g		0.82704
1227	1540	1422	1176	1596	1391	-	CAGL0A04147g	PEX13		0.827004
1260	1311	2722	2251	2934	3008	-	CAGL0H03113g	CAGL0H03113g		0.826965
6915	8802	5563	4600	6733	5438	-	CAGL0E00737g	CAGL0E00737g		0.826892
5240	6888	4829	3993	5003	4385	-	CAGL0G00506g	CAGL0G00506g		0.826879
4495	5097	2784	2302	3739	3261	-	CAGL0M05291g	CAGL0M05291g		0.826868
1268	1380	1253	1036	2403	2328	-	CAGL0C02519g	CAGL0C02519g		0.826816
3602	4440	3929	3248	4522	4159	-	CAGL0K05577g	CAGL0K05577g		0.826673
3599	4414	10860	8977	12762	9534	-	CAGL0G05962g	CAGL0G05962g		0.826611
10856	13895	16245	13427	17339	12876	-	CAGL0H00330g	CAGL0H00330g		0.826531
1607	1757	1290	1066	1441	1065	-	CAGL0J06116g	CAGL0J06116g		0.826357
19375	23582	21837	18041	23223	23856	-	CAGL0F03883g	GAS4		0.826167
2230	2727	2508	2072	3360	2719	-	CAGL0B01529g	PEX7		0.826156
24	35	224	185	139	121	-	CAGL0G09108g	CAGL0G09108g		0.825893
3411	4163	2216	1830	2526	2260	-	CAGL0F05511g	CAGL0F05511g		0.825812
5173	6313	12153	10036	13016	12363	-	CAGL0G01100g	CAGL0G01100g		0.825804
321	421	1538	1270	1198	9848	-	CAGL0G02937g	CAGL0G02937g		0.825748
10068	11896	13767	11368	14411	13287	-	CAGL0F02893g	CAGL0F02893g		0.825743
3568	4319	878	725	1780	1414	-	CAGL0G07975g	CAGL0G07975g		0.82574
3048	3697	3552	2933	3465	3470	-	CAGL0C00209g	AWP7		0.825732
900	1287	493	407	710	563	-	CAGL0A02772g	CAGL0A02772g		0.825558
18443	25057	35466	29278	41756	35613	-	CAGL0D00462g	CAGL0D00462g		0.825523
21943	28418	43086	35565	44566	37296	-	CAGL0F04345g	CAGL0F04345g		0.825442
2269	3231	4250	3508	4096	3922	-	CAGL0L10092g	CAGL0L10092g		0.825412
8072	10035	23468	19370	26653	22548	-	CAGL0I00924g	CAGL0I00924g		0.825379
17714	20975	19889	16412	25765	20597	-	CAGL0F00693g	CAGL0F00693g		0.82518
1091	1360	858	708	1414	1288	-	CAGL0D04466g	CAGL0D04466g		0.825175
1556	1868	874	721	873	840	-	CAGL0J11000g	CAGL0J11000g		0.824943
3017	3674	5204	4293	5722	5480	-	CAGL0K05621g	CAGL0K05621g		0.824942
2852	3348	3586	2958	4332	3798	-	CAGL0K09856g	CAGL0K09856g		0.824875
5197	6454	1278	1054	2259	1810	-	CAGL0M07700g	CAGL0M07700g		0.824726
246640	303554	329031	271338	383707	358239	-	CAGL0I00418g	CAGL0I00418g		0.824658
4252	5184	4846	3996	6299	5474	-	CAGL0D04510g	CAGL0D04510g		0.824598
1112	1321	3946	3253	3172	2740	-	CAGL0D00990g	CAGL0D00990g		0.824379
2803	3362	1133	934	1531	1290	-	CAGL0B01771g	CAGL0B01771g		0.82436
5885	7301	6308	5200	8128	7117	-	CAGL0C02453g	CAGL0C02453g		0.82435
168017	216503	270185	222711	345325	270530	-	CAGL0F04213g	CAGL0F04213g		0.824291
1543	1923	6441	5309	5414	4976	-	CAGL0B03465g	CAGL0B03465g		0.824251
52521	64784	53533	44120	61709	48002	-	CAGL0H04961g	CAGL0H04961g		0.824165
494443	594663	353375	291148	691518	450722	-	CAGL0E06358g	GPM1		0.823907
1738	1998	1691	1393	1828	1699	-	CAGL0H03201g	CAGL0H03201g		0.823773
2060	2558	1632	1344	2118	1828	-	CAGL0I02332g	CAGL0I02332g		0.823529
1862	2394	1541	1269	1980	1697	-	CAGL0G05203g	CAGL0G05203g		0.823491
4356	5773	9337	7687	12396	9596	-	CAGL0K09702g	CAGL0K09702g		0.823284
1939	2101	911	750	1591	1546	-	CAGL0L10934g	CAGL0L10934g		0.823271
6692	7976	5173	4257	6552	5326	-	CAGL0H03883g	CAGL0H03883g		0.822927
1491	1847	3513	2890	4239	3790	-	CAGL0H01837g	CAGL0H01837g		0.822659
2537	2936	4398	3618	4329	4409	-	CAGL0K04851g	PEX17		0.822647
3621	4721	4561	3752	5228	4345	-	CAGL0C04499g	CAGL0C04499g		0.822627
1706	2079	2052	1688	2210	2153	-	CAGL0K06721g	CAGL0K06721g		0.822612
7896	9855	4033	3317	5513	4306	-	CAGL0K02717g	CAGL0K02717g		0.822465
27297	33133	14164	11646	24498	17833	-	CAGL0G04213g	CAGL0G04213g		0.822225
14779	18183	20042	16475	27732	22393	-	CAGL0B02794g	CAGL0B02794g		0.822024
26947	34022	87327	71762	81405	80666	-	CAGL0L01925g	UGP1		0.821762
3040	4279	3262	2680	3885	3400	-	CAGL0H02123g	CAGL0H02123g		0.821582
6365	8792	3155	2592	4023	3304	-	CAGL0G04675g	CAGL0G04675g		0.821553
7807	9639	6544	5375	10530	7928	-	CAGL0H06523g	CAGL0H06523g		0.821363
2140	2765	2098	1723	2622	2642	-	CAGL0J07326g	CAGL0J07326g		0.821258
10544	10645	1007	827	2816	2146	-	CAGL0M05775g	CAGL0M05775g		0.821251
7247	9721	7642	6276	8085	7574	-	CAGL0A04455g	CAGL0A04455g		0.821251
6802	8170	3003	2466	4850	4631	-	CAGL0J02750g	CAGL0J02750g		0.821179
1661	2022	7083	5815	9361	7144	-	CAGL0E01815g	YPS8		0.82098
626251	742221	325229	266954	928153	546218	-	CAGL0M12034g	PYK1		0.820819
4081	4693	4511	3702	5196	4569	-	CAGL0K12584g	CAGL0K12584g		0.820661
1791	2423	4040	3315	5184	5285	-	CAGL0J03608g	CAGL0J03608g		0.820545
21286	23493	106527	87396	122344	111118	-	CAGL0A04829g	CAGL0A04829g		0.820412
5393	6990	9031	7409	10665	9159	-	CAGL0I06402g	CAGL0I06402g		0.820396
3567	4053	1769	1451	2103	1925	-	CAGL0L05698g	CAGL0L05698g		0.820237
852	1186	2136	1752	2683	2555	-	CAGL0B02387g	CAGL0B02387g		0.820225
3845	4289	2697	2212	3447	2839	-	CAGL0J07106g	CAGL0J07106g		0.820171
5709	7610	15843	12993	14977	13491	-	CAGL0A04301g	CAGL0A04301g		0.82011
4338	5049	2262	1855	3640	2947	-	CAGL0H08349g	CAGL0H08349g		0.820071
9175	10798	9623	7891	12081	10430	-	CAGL0E01001g	CAGL0E01001g		0.820015
6245	7997	12200	10002	13663	12212	-	CAGL0C03894g	CAGL0C03894g		0.819836
1422	1934	23502	19267	20373	20636	-	CAGL0L05720g	CAGL0L05720g		0.819803
540	653	638	523	711	669	-	CAGL0M04015g	CAGL0M04015g		0.819749
64	60	61	50	45	61	-	CAGL0M09471g	CAGL0M09471g		0.819672
14714	20433	14623	11985	20429	14122	-	CAGL0K11418g	ADK1		0.819599
1665	2178	1890	1549	1780	1858	-	CAGL0K01507g	CAGL0K01507g		0.819577
547	671	399	327	454	329	-	CAGL0H08624g	CAGL0H08624g		0.819549
16257	19438	53490	43837	43537	47323	-	CAGL0K07480g	PGM1		0.819536
1826550	2230420	1755660	1438810	2754250	1952790	-	CAGL0G09383g	TDH3		0.819527
[truncated: 3,243 more rows]

## Sheet: Sup. Fig. S1 - PHO5 homologs
Species	GeneID	GeneName	Protein length
S. cerevisiae	YBR093C	PHO5	467
S. cerevisiae	YBR092C	PHO3	467
S. cerevisiae	YHR215W	PHO12	467
S. cerevisiae	YAR071W	PHO11	467
S. cerevisiae	YDL024C	DIA3	468
S. mikatae	2.235	NA	467
S. mikatae	2.234	NA	467
S. mikatae	2.233	NA	467
K. lactis	KLLA0C19338g	NA	469
K. lactis	KLLA0B00286g	NA	476
K. lactis	KLLA0A00176g	NA	476
K. lactis	KLLA0D00258g	NA	492
K. lactis	KLLA0E24949g	NA	492		Supplementary figure 1. Syntenic relationship between PHO5 homologs in S. cerevisiae and S. mikatae. Rows in the figure represent chromosomes and boxes represent genes. Genes are aligned in columns based on inferred syntenic relationship between species, where missing boxes indicate no syntenic homolog detected. S. cerevisiae and S. mikatae belong to a group of species whose common ancestor has e…
S. pombe	SPBP4G3.02	pho1	453
S. pombe	SPBC428.03c	pho4	463
S. pombe	SPBC21H7.03c	N/A	463

## Sheet: Sup. Fig. S2 - phylogenetictree
Source of sequences:
Scer|YBR093C
Scer|YDL024C
Scer|YBR092C
Scer|YHR215W
Scer|YAR071W
Smik|2.233
Smik|2.234
Smik|2.235
Spar|2.251
Spar|4.254
Spar|8.343
Sbay|sbayc678-g120.1
Sbay|sbayc542-g1.1
Sbay|sbayc678-g121.1
Sbay|sbayc640-g2.1
Lwal|LAWA0G12574g
Lwal|LAWA0H00716g
Lwal|LAWA0B00496g
Klac|KLLA0C19338g
Klac|KLLA0B00286g
Klac|KLLA0A00176g
Klac|KLLA0D00258g
Klac|KLLA0E24949g
Lklu|SAKL0G17028g
Lklu|SAKL0B07678g
Clus|CLUG04585
Dhan|DEHA2C08580g
Dhan|DEHA2F07700g
Dhan|DEHA2F07722g
Cgui|PGUG01443.1
Ctro|CTRG00898.3
Ctro|CTRG00134.3
Ctro|CTRG00890.3
Ctro|CTRG00902.3
Calb|orf19.4584
Calb|orf19.3727
Calb|orf19.2619
Cpar|CPAG03210
Cpar|CPAG04424
Lelo|LELG00124
Lelo|LELG05800
Ylip|YALI0C06930g
Anid|AN11111
Anid|AN0564
Ncra|NCU03255
Ncra|NCU06351
Sjap|SJAG01970
Sjap|SJAG04067
Soct|SOCG04697
Soct|SOCG00661
Spom|SPBP4G3.02
Spom|SPBC21H7.03c
Spom|SPBC428.03c

## Sheet: Sup. Fig. S3 - PMU2-3 ancestor
													Supplementary figure 2. Sequence of PMU2/3 ancestor. CgPmu1-3 were aligned using a MUSCLE protein alignment. We identified every case where CgPmu2 and CgPmu3 had the same amino acid and it was different from CgPmu1. This identified 55 amino acids out of the 323 amino acids present in CgPmu1. We then ordered from GENEWIZ (South Plainfield, NJ) a synthetic sequence replacing codons in CgPMU1 with a…

## Sheet: Sup. Table S2 - Strains
	Supplementary Table 2. Stranis used in this study.
	Strain number	Strain	Reference
	Yeast strains
	DG5	C. glabrata wild-type (his3-) (BG99)	Cormack and Falkow Genetics 1999
	DG141	Cgthi3::NATMX6 in DG5	Iosue et al PlosOne 2016
	DG176	C. glabrata wild-type (his3-ura3-)	Iosue et al PlosOne 2016
	DG2	Cgpho4::KANMX6 in DG5	Kerwin and Wykoff Genetics 2009
	DC3	S. cerevisiae wild-type K699 ade2-1 trp1-1 can1-100 leu2-3,112 his3-11,15 ura3	Wykoff and O'Shea Genetics 2001
	DP1	Schizosaccharomyces pombe wild-type 972 h-	From D. Moazed laboratory
	DG29	Cgpmu2::NATMX6 in DG5	Orkwis et al Genetics 2010
	DG30	Cgpmu3::NATMX6 in DG5	Orkwis et al Genetics 2010
	DG314	Cgpmu3::CgURA3 in DG176	This study
	DG320	CgURA3::ScPHO3 in DG314	This study
	DG318	CgURA3::ScPHO5 in DG314	This study
	DG327	CgURA3::S. mikataePHO5 g5 in DG314	This study
	DG328	CgURA3::S. mikataePHO5 g4 in DG314	This study
	DG332	CgURA3::CgPMU1 in DG314	This study
	DG317	CgURA3::CgPMU2 in DG314	This study
	DG345	CgURA3::Ancestral PMU2/3 in DG314	This study
	DG319	CgURA3::K. lactis KLLAO_C19338g in DG314	This study
	DG373	CgURA3::K. lactis KLLAO_D00258g in DG314	This study
	DG326	CgURA3:: S. kluyveriPHO5 in DG314	This study
	DG331	CgURA3::Y. lipolytica PHO5 in DG314	This study
	DG329	CgURA3::S. pombePHO1 in DG314	This study
	DG330	CgURA3::S. pombePHO4 in DG314	This study
	DG338	ScPHO5p-ScPHO3-YFP-pRS313 in DG29	This study
	DG337	ScPHO5p-ScPHO5-YFP-pRS313 in DG29	This study
	DG335	ScPHO5p-S. mikatae PHO5 g5-YFP-pRS313 in DG29	This study
	DG336	ScPHO5p-S. mikatae PHO5 g4-YFP-pRS313 in DG29	This study
	DG200	ScPHO5p-CgPMU1-YFP-pRS313 in DG29	Orkwis et al Genetics 2010
	DG198	ScPHO5p-CgPMU2-YFP-pRS313 in DG29	Orkwis et al Genetics 2010
	DG199	ScPHO5p-CgPMU3-YFP-pRS313 in DG29	Orkwis et al Genetics 2010
	DG343	ScPHO5p-Ancestral PMU2/3-YFP-pRS313 in DG29	This study
	DG333	ScPHO5p-K. lactis KLLAO_C19338g-YFP-pRS313 in DG29	This study
	DG367	ScPHO5p-K. lactis KLLAO_D00258g-YFP-pRS313 in DG29	This study
	DG334	ScPHO5p-S. Kluyveri PHO5-YFP-pRS313 in DG29	This study
	DG341	ScPHO5p-Y. lipolytica PHO5-YFP-pRS313 in DG29	This study
	DG339	ScPHO5p-S. pombe PHO1-YFP-pRS313 in DG29	This study
	DG340	ScPHO5p-S. pombe PHO4-YFP-pRS313 in DG29	This study
	DG197	ScPHO5p-YFP-pRS313 in DG29	Orkwis et al Genetics 2010
	Bacterial strains
	DB346	3 Kb CgPMU2p-YFP-pRS313	Kerwin and Wykoff FEMS 2012
	DB347	1 Kb CgPMU3p-YFP-pRS313	This study
	DB146	ScPHO5p-YFP-pRS313	Orkwis et al Genetics 2010
	DB147	ScPHO5p-CgPMU2-YFP-pRS313	Orkwis et al Genetics 2010
	DB148	ScPHO5p-CgPMU3-YFP -pRS313	Orkwis et al Genetics 2010

## Sheet: Sup. Table S3 - Primers
Supplementary Table 3. Primers used in this study.
Primers to Replace CgPMU3 ORF with CgURA3
DG314	Cgpmu3::CgURA3 in DG176	O1858	TGTCATCAGATATATCAAATATATATCCACTCTCGTTACAcacaggaaacagctatgacc
		O1859	ATGTAGACGGTGATCCTATTTGATATAGATGATCGGAGTTgttgtaaaacgacggccagt
		O1905	TTA CTC TTA CTA GGT ATC AAT AG	Check Primer (5')
		O1906	GGTCATAGCTGTTTCCTGTG	Check Primer (3')
Primers to Replace CgURA3 in Cgpmu3::CgURA3 with phosphatase ORFs
DG317	CgURA3::CgPMU2 in DG314	O1860	TGTCATCAGATATATCAAATATATATCCACTCTCGTTACAatgatccttcataaattgct
		O1861	ATGTAGACGGTGATCCTATTTGATATAGATGATCGGAGTTttaggatactacgatgaccg
		O1932	TTACTCAGAAAGGGACCAAC	Check Primer (5')
DG318	CgURA3::ScPHO5 in DG314	O1862	TGTCATCAGATATATCAAATATATATCCACTCTCGTTACAatgtttaaatctgttgttta
		O1863	ATGTAGACGGTGATCCTATTTGATATAGATGATCGGAGTTctattgtctcaatagactgg
		O1933	CAACTTAACTGCCGAATAC	Check Primer (5')
DG319	CgURA3::K. lactis KLLAO_C19338g in DG314	O1935a	TGTCATCAGATATATCAAATATATATCCACTCTCGTTACAATGAATTTATTATTACTCAC
		O1936a	ATGTAGACGGTGATCCTATTTGATATAGATGATCGGAGTTTTATTGTATTAGAAGTGATG
		O1937a	TAACTATCTCGCTACTGTAG	Check Primer (5')
DG320	CgURA3::ScPHO3 in DG314	O1864	TGTCATCAGATATATCAAATATATATCCACTCTCGTTACAatgtttaagtctgttgttta
		O1865	ATGTAGACGGTGATCCTATTTGATATAGATGATCGGAGTTttattgttttaatagggtat
		O1934	GTACGTTCCTCAAGGTGCTC	Check Primer (5')
DG326	CgURA3:: S. kluyveriPHO5 in DG314	O1938	TGTCATCAGATATATCAAATATATATCCACTCTCGTTACAATGATTGGTTTACCATTTTT
		O1939	ATGTAGACGGTGATCCTATTTGATATAGATGATCGGAGTTTCAGTATGAAGCCAAGGTTA
		O1940	ATCGAAAACTACTTGGCGAC	Check Primer (5')
DG327	CgURA3::S. mikataePHO5 g5 in DG314	O1941	TGTCATCAGATATATCAAATATATATCCACTCTCGTTACAATGTTCAAGTCTGTTGTTTA
		O1942	ATGTAGACGGTGATCCTATTTGATATAGATGATCGGAGTTCTATTGCTTTAGTAGAGTAC
		O1943	ACGTTCCATTCATGGGCAAC	Check Primer (5')
DG328	CgURA3::S. mikataePHO5 g4 in DG314	O1944	TGTCATCAGATATATCAAATATATATCCACTCTCGTTACAATGTTCAATTCGATTCTTTA
		O1945	ATGTAGACGGTGATCCTATTTGATATAGATGATCGGAGTTCTATTGTCTCAGTAAACTG
		O1946	GGTTTGGTTGAGTTTCACCC	Check Primer (5')
DG329	CgURA3::S. pombePHO1 in DG314	O1979	TGTCATCAGATATATCAAATATATATCCACTCTCGTTACAatgttcttgcaaaatttatt
		O1980	ATGTAGACGGTGATCCTATTTGATATAGATGATCGGAGTTttaataaggataaacagcag
		O1981	tcactgacaatactcctgag	Check Primer (5')
DG330	CgURA3::S. pombePHO4 in DG314	O1982	TGTCATCAGATATATCAAATATATATCCACTCTCGTTACAatgaagttaagtggtatttc
		O1983	ATGTAGACGGTGATCCTATTTGATATAGATGATCGGAGTTctaagtctagtagtagacgg
		O1984	gatcgtaaggtattcttagc	Check Primer (5')
DG331	CgURA3::Y. lipolytica PHO5 in DG314	O1985	TGTCATCAGATATATCAAATATATATCCACTCTCGTTACAatgagcaagtaccgaaaact
		O1986	ATGTAGACGGTGATCCTATTTGATATAGATGATCGGAGTTctacaactctccctcgcaca
		O1987	TAAGACCTTCCCTCTGGACC	Check Primer (5')
DG332	CgURA3::CgPMU1 in DG314	O1988	TGTCATCAGATATATCAAATATATATCCACTCTCGTTACAatgatcctacatagactgct
		O1989	ATGTAGACGGTGATCCTATTTGATATAGATGATCGGAGTTttatgacacaacaagcattg
		O1990	gtgcacacgtgtgatgaacg	Check Primer (5')
DG345	CgURA3::Ancestral PMU2/3 in DG314	O2019	TGTCATCAGATATATCAAATATATATCCACTCTCGTTACAatgATCTTGCATAGATTGTT
		O2020	ATGTAGACGGTGATCCTATTTGATATAGATGATCGGAGTTttaAGAAACAACCAACATTG
		O2042	CATTCAGATGTTATTGAATC	Check Primer (5')
DG373	CgURA3::K. lactis KLLAO_D00258g in DG314	O2122	TGTCATCAGATATATCAAATATATATCCACTCTCGTTACAATGAAGCAGATCAAAAACGCAG
		O2123	ATGTAGACGGTGATCCTATTTGATATAGATGATCGGAGTTTTACTTGTTACTAACGGGACCG
		O2124	TTCCTGTCCTATCGAGGAC	Check Primer (5')
	Primers to add homology for ntegration of phosphatase ORFs	O1947	CATATATCATCCTTAGCATTGTTCTTAGACTAAATGTTATTGTAGAAATCAAATACCAACTGTCATCAGATATATCAAAT
		O1948	TTTTATGCAGTGAACTTTTAGCGAATGGATGAACAAAGAAACATAGACCCGGCTACCAATGTAGACGGTGATCCTATTTG
	Check for integration of phosphatase ORFs (3')	O1931	ATGAACAAAGAAACATAGACC
Primers to insert phosphatase ORFs into ScPHO5p-YFP-pRS313 plasmid
DG333	ScPHO5p-K. lactis KLLAO_C19338g-YFP-pRS313 in DG29	O2043	caaatagagcaagcaaattcgagattaccaATGAATTTATTATTACTCAC
		O2044	accagtgaataattcttcacctttagacatTTATTGTATTAGAAGTGATG
		O1937a	TAACTATCTCGCTACTGTAG	Check Primer (5')
DG334	ScPHO5p-S. Kluyveri PHO5-YFP-pRS313 in DG29	O2045	caaatagagcaagcaaattcgagattaccaATGATTGGTTTACCATTTTT
		O2046	accagtgaataattcttcacctttagacatTCAGTATGAAGCCAAGGTTA
		O1940	ATCGAAAACTACTTGGCGAC	Check Primer (5')
DG335	ScPHO5p-S. mikatae PHO5 g5-YFP-pRS313 in DG29	O2047	caaatagagcaagcaaattcgagattaccaATGTTCAAGTCTGTTGTTTA
		O2048	accagtgaataattcttcacctttagacatCTATTGCTTTAGTAGAGTAC
		O1943	ACGTTCCATTCATGGGCAAC	Check Primer (5')
DG336	ScPHO5p-S. mikatae PHO5 g4-YFP-pRS313 in DG29	O2049	caaatagagcaagcaaattcgagattaccaATGTTCAATTCGATTCTTTA
		O2050	accagtgaataattcttcacctttagacatCTATTGTCTCAGTAAACTG
		O1946	GGTTTGGTTGAGTTTCACCC	Check Primer (5')
DG337	ScPHO5p-ScPHO5-YFP-pRS313 in DG29	O2051	caaatagagcaagcaaattcgagattaccaATGtttaaatctgttgttta
		O2052	accagtgaataattcttcacctttagacatctattgtctcaatagactgg
		O1933	CAACTTAACTGCCGAATAC	Check Primer (5')
DG338	ScPHO5p-ScPHO3-YFP-pRS313 in DG29	O2053	caaatagagcaagcaaattcgagattaccaatgtttaagtctgttgttta
		O2054	accagtgaataattcttcacctttagacatttattgttttaatagggtat
		O1934	GTACGTTCCTCAAGGTGCTC	Check Primer (5')
DG339	ScPHO5p-S. pombe PHO1-YFP-pRS313 in DG29	O2055	caaatagagcaagcaaattcgagattaccaATGttcttgcaaaatttatt
		O2056	accagtgaataattcttcacctttagacatttaataaggataaacagcag
		O1981	tcactgacaatactcctgag	Check Primer (5')
DG340	ScPHO5p-S. pombe PHO4-YFP-pRS313 in DG29	O2057	caaatagagcaagcaaattcgagattaccaATGaagttaagtggtatttc
		O2058	accagtgaataattcttcacctttagacatctaagtctagtagtagacgg
		O1984	gatcgtaaggtattcttagc	Check Primer (5')
DG341	ScPHO5p-Y. lipolytica PHO5-YFP-pRS313 in DG29	O2059	caaatagagcaagcaaattcgagattaccaATGagcaagtaccgaaaact
		O2060	accagtgaataattcttcacctttagacatctacaactctccctcgcaca
		O1987	TAAGACCTTCCCTCTGGACC	Check Primer (5')
DG343	ScPHO5p-Ancestral PMU2/3-YFP-pRS313 in DG29	O2066	caaatagagcaagcaaattcgagattaccaATGATCTTGCATAGATTGTT
		O2067	accagtgaataattcttcacctttagacatTTAAGAAACAACCAACATTG
		O2042	CATTCAGATGTTATTGAATC	Check Primer (5')
DG367	ScPHO5p-K. lactis KLLAO_D00258g-YFP-pRS313 in DG29	O2128	caaatagagcaagcaaattcgagattaccaATGAAGCAGATCAAAAACGCAG
		O2129	accagtgaataattcttcacctttagacatTTACTTGTTACTAACGGGACCG
		O2130	GGTTGCACCTCAGGTCCAGG	Check Primer (5')
	Check for integration of phosphatase ORFs (3')	O245	GGGACAACACCAGTGAATAATTCTTCACC
Primers to put promoters in front of YFP
DB346	3 Kb CgPMU2p-YFP-pRS313	O318A	ggtggcggccgctctagaactagtggatcccacttctattactcctatcacttg
		O321	accagtgaataattcttcacctttagacattgtaacgagagtggatattt
DB347	1 Kb CgPMU3p-YFP-pRS313	O1479	ggtggcggccgctctagaactagtggatccgggcctgacgctgttacaac
		O1478	accagtgaataattcttcacctttagacattgtaacgagagtggatatat
qPCR Primers
	ScPHO5	O151	TGCTTGTAACTCATGTCCTGC
		O152	TTGAGGTCAAGTTCAAACCCT
	ScPHO3	O2068	GTAATGCGTGCCCAGGATGG
		O2069	ACGTACCAATTCATCTTCGG
	ScACT1	O155	TCCTACGAACTTCCAGATGGT
		O156	GGCAGATTCCAAACCCAAAA
	CgPMU1	O191	gtgcacacgtgtgatgaacgtg
		O192	cattggttgatcatctgtaggc
	CgPMU2	O664	gtgatgttactgttcattttgattatcctg
		O641	gatacatcgatcacagtgtaaactag
	CgPMU3	O195	ctctagcagaataccaggatc
		O196	ctacgagaattgattgatcatc
	CgACT1	O75	gaccaaactacttacaactcc
		O76	ccactttcgtcgtattcttgcttg
	SpPHO1	O69	gctaatagccttgcaaattccctc
		O70	ctagcattgcaaagagtgtcaaag
	SpPHO4	O2070	ccagtcgaggctgctcttggg
		O2071	gacattgcgagttaaaattag
	SpACT1	O66	ggtattcatgaggctacttacaac
		O67	ccgctctcatcatactcttgcttg
