# Supplementary material
Source: publisher figshare collection journal article supplement (https://gsajournals.figshare.com/articles/dataset/_/6220109)
Supplement: Supplementary file 1 [file 1]

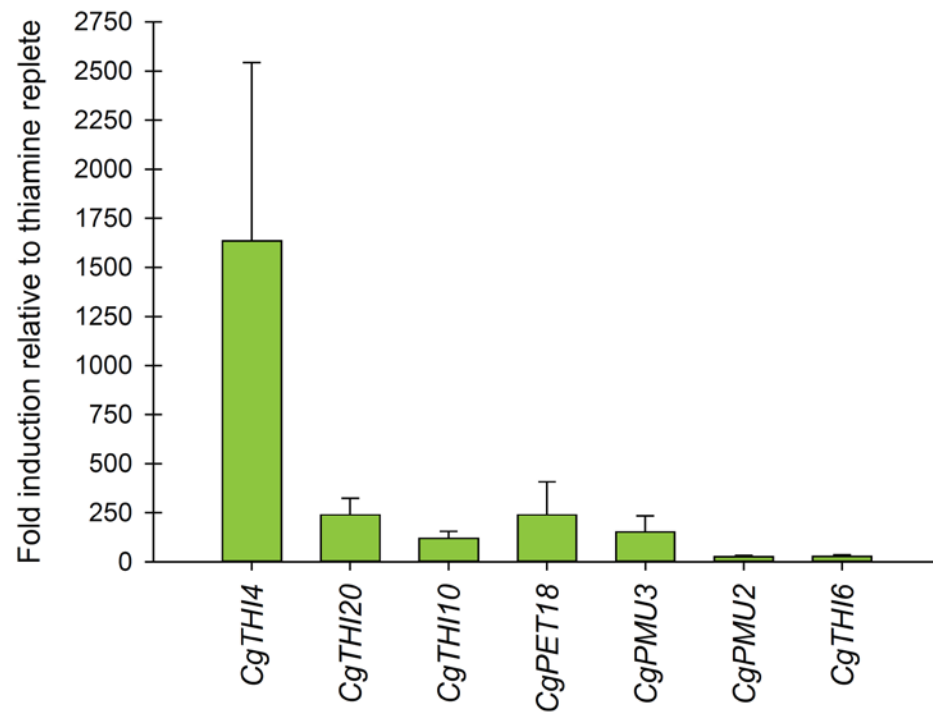

**Figure S1. Induction of genes during thiamine starvation of *C. glabrata* wild-type.** *C. glabrata* wild-type was grown in thiamine replete and starvation conditions for four hours. qPCR was performed on reverse-transcribed RNA from these samples to determine the fold induction in thiamine starvation relative to replete. These data confirmed induction of the most highly induced genes during thiamine starvation as determined by the RNA-seq data in Figure 1. Fold induction for *CgPMU2* is  $25.6 \pm 6.22$  and for *CgTHI6* is  $26.7 \pm 7.28$ . Error bars represent the standard deviation of the average of fold induction for three independently grown biological replicates. All seven genes are considered induced based on a Student's T test,  $P < 0.01$ .

| Species              | GeneID       | GeneName | Protein length |
|----------------------|--------------|----------|----------------|
| <i>S. cerevisiae</i> | YBR093C      | PHO5     | 467            |
| <i>S. cerevisiae</i> | YBR092C      | PHO3     | 467            |
| <i>S. cerevisiae</i> | YHR215W      | PHO12    | 467            |
| <i>S. cerevisiae</i> | YAR071W      | PHO11    | 467            |
| <i>S. cerevisiae</i> | YDL024C      | DIA3     | 468            |
| <i>S. mikatae</i>    | 2.235        | NA       | 467            |
| <i>S. mikatae</i>    | 2.234        | NA       | 467            |
| <i>S. mikatae</i>    | 2.233        | NA       | 467            |
| <i>K. lactis</i>     | KLLA0C19338g | NA       | 469            |
| <i>K. lactis</i>     | KLLA0B00286g | NA       | 476            |
| <i>K. lactis</i>     | KLLA0A00176g | NA       | 476            |
| <i>K. lactis</i>     | KLLA0D00258g | NA       | 492            |
| <i>K. lactis</i>     | KLLA0E24949g | NA       | 492            |
| <i>S. pombe</i>      | SPBP4G3.02   | pho1     | 453            |
| <i>S. pombe</i>      | SPBC428.03c  | pho4     | 463            |
| <i>S. pombe</i>      | SPBC21H7.03c | N/A      | 463            |

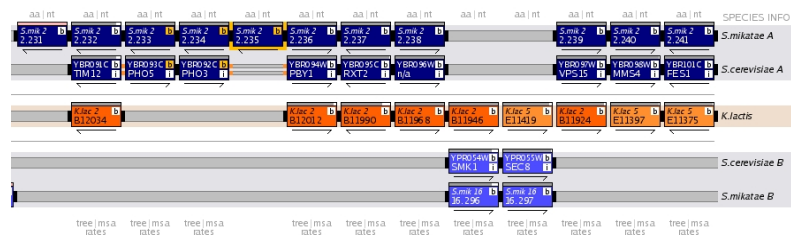

**Figure S2. Syntenic relationship between *PHO5* homologs in *S. cerevisiae* and *S. mikatae*.** Rows in the figure represent chromosomes and boxes represent genes. Genes are aligned in columns based on inferred syntenic relationship between species, where missing boxes indicate no syntenic homolog detected. *S. cerevisiae* and *S. mikatae* belong to a group of species whose common ancestor has experienced a whole-genome-duplication (WGD). Therefore, each species has two sets of chromosomes (A vs B) that correspond to a single set of ancestral chromosomes. *K. lactis*, as a pre-WGD species, represents the ancestral state. Other features in this figure are explained in detail on the Yeast Gene Order Browser help page (<http://ygo.b.ucd.ie/>), from which this screenshot was taken on Oct 7, 2017 (Byrne and Wolfe, 2006). This plot shows that the three *PHO5* homologs in *S. mikatae* form a single cluster, suggesting a possible origination through tandem duplication. The syntenic region in *S. cerevisiae* contains just two genes, *ScPHO5* and *ScPHO3*, which are also arranged in tandem. Note that *S. mikatae* likely experienced an additional duplication event as indicated by the yellow box around 2.235. The other three *PHO5* homologs in *S. cerevisiae* are on different chromosomes. We also looked at *K. lactis* and found that none of its five *PHO5* homologs are syntenic with those in *S. cerevisiae* or *S. mikatae*. The distantly related *S. pombe* is not included in YGOB.

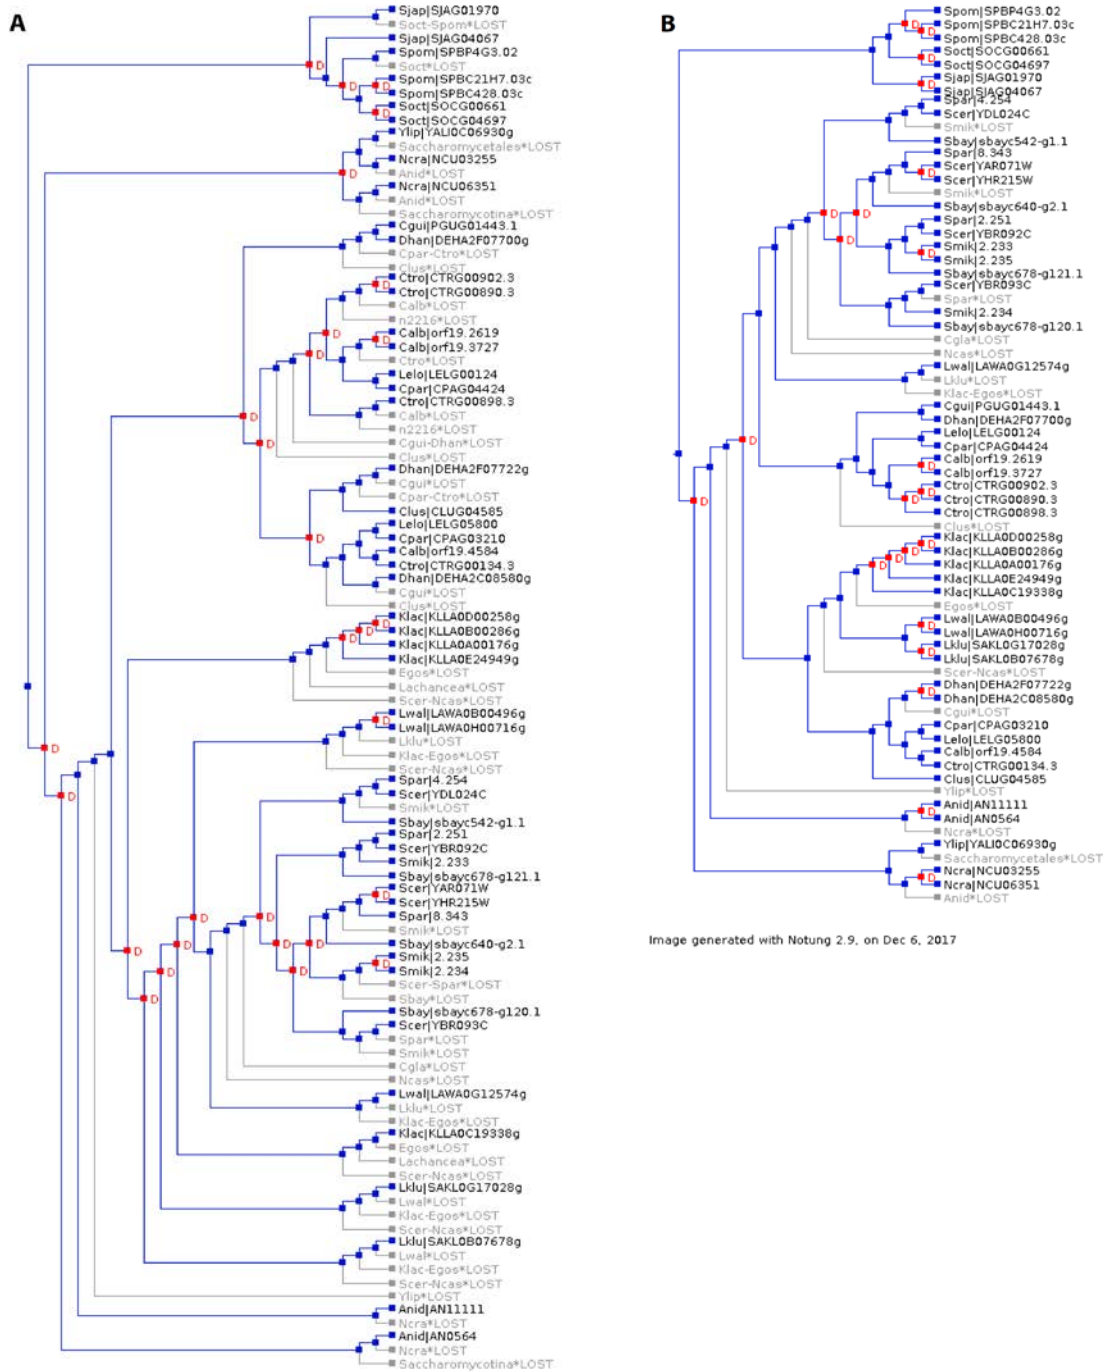

Image generated with Notung 2.9, on Dec 6, 2017

Image generated with Notung 2.9, on Dec 6, 2017

Source of sequences:

Scer|YBR093C  
Scer|YDL024C  
Scer|YBR092C  
Scer|YHR215W  
Scer|YAR071W  
Smik|2.233  
Smik|2.234  
Smik|2.235  
Spar|2.251  
Spar|4.254  
Spar|8.343

**Figure S3. Reconciled gene tree for the *PHO5* family showing inferred duplication and loss events.** (A) Reconciled tree without rearrangement. Inferred duplication events are marked with "D" in red font. Loss events are shown in gray. Species and gene names are labeled at the leaf nodes, separated by "|". (B) Reconciled and rearranged gene tree. During the rearrangement operation, Notung (v2.9) explores alternative topologies by swapping weakly supported branches with bootstrap values below 90/100 in the reconstructed gene tree. The result is a topology that minimizes the total event score (23/15 duplication/loss events compared to 29/48 before rearrangement).

Sbay|sbayc678-g120.1  
Sbay|sbayc542-g1.1  
Sbay|sbayc678-g121.1  
Sbay|sbayc640-g2.1  
Lwal|LAWA0G12574g  
Lwal|LAWA0H00716g  
Lwal|LAWA0B00496g  
Klac|KLLA0C19338g  
Klac|KLLA0B00286g  
Klac|KLLA0A00176g  
Klac|KLLA0D00258g  
Klac|KLLA0E24949g  
Lklu|SAKL0G17028g  
Lklu|SAKL0B07678g  
Clus|CLUG04585  
Dhan|DEHA2C08580g  
Dhan|DEHA2F07700g  
Dhan|DEHA2F07722g  
Cgui|PGUG01443.1  
Ctro|CTRG00898.3  
Ctro|CTRG00134.3  
Ctro|CTRG00890.3  
Ctro|CTRG00902.3  
Calb|orf19.4584  
Calb|orf19.3727  
Calb|orf19.2619  
Cpar|CPAG03210  
Cpar|CPAG04424  
Lelo|LELG00124  
Lelo|LELG05800  
Ylip|YALI0C06930g  
Anid|AN11111  
Anid|AN0564  
Ncra|NCU03255  
Ncra|NCU06351  
Sjap|SJAG01970  
Sjap|SJAG04067  
Soct|SOCG04697  
Soct|SOCG00661  
Spom|SPBP4G3.02  
Spom|SPBC21H7.03c  
Spom|SPBC428.03c

```

ATG ATC TTG CAT AGA TTG TTG TTG TTG AAT TTG GAT TGG AAC CCA GAT AAC ACA GCT CAA GAT TTG GAT TTT AGA GCA TTG CCA GGT TAC TTC AAG G < 100
M I L H R L L L L L N L D W N F D N T A Q D L D F R A L P G Y F K G
10 20 30 40 50 60 70 80 90

GT TAC ACA GTT CAA GAT ACT CCA GAT ACA AGA ATT AAT GCT ACT GAA TTG GAT TTC TTG GCA TTC GAT GAT AGA TTT TCA AAC TGG CAA CAA TTG TAC CA < 200
Y T V Q D T P D T R I N A T E L D F L A F D D R F S N W Q Q L Y Q
110 120 130 140 150 160 170 180 190

A GCT ATC CCA AAC GAT ACT GAA ACA CAT TCT TAC AAA TTA GTT ATT TTG GCA AGA CAT GGT CAA GGT TAT CAT AAT GCT GCT TAT GAT AGA TAC GGT GAA < 300
A I P N D T E T H S Y K L V I L A R H G Q G Y H N A A Y D R Y G E
210 220 230 240 250 260 270 280 290

AAA GCA TGG TAT GAT TAC TGG TCA AGA TTA GAA GGT GAC CAA TAC GGT AAT TGG TTT GAT GCA GAA TTA ACT CCA TTG GGT AAA AAG CAA GCA TTG GAA G < 400
K A W Y D Y W S R L E G D Q Y G N W F D A E L T F L G K K Q A L E A
310 320 330 340 350 360 370 380 390

CA GGT CAA ACT TAT TTG ACA AAT TTG ACT GAT GGT TTG CAA AGA TTG CCT GAT AAG TTT TTC GTT TCT CCA TTA AGA AGA TGT TTG GAT ACA TGT ATC AG < 500
G Q T Y L T N L T D G L Q R L P D K F F V S F L R R C L D T C I R
410 420 430 440 450 460 470 480 490

A GAA TGG GAA CCA ATC TTC GCT AAG CAT AAG CCA GCA AAT TCA ACT GTT CAT GTT AAA GTT ATT GAA TAC TTA AGA GAA ACA TTG GGT ATC GAT ACT TCT < 600
E W E P I F A K H K P A N S T V H V K V I E Y L R E T L G I D T S
510 520 530 540 550 560 570 580 590

AAC GAA AGA GTT TCT CAT TCA CAA GCA TTG GCA GAA TAC CAA GAT CAT AGA TAC AAC ACA TCA GAT GTT ACT GTT CAT TTC GAT TAT CCT GGT GAC TAC T < 700
N E R V S H S Q A L A E Y Q D H R Y N T S D V T V H F D Y P G D Y S
610 620 630 640 650 660 670 680 690

CT GAA AAA GAT CAA TTA TGG CAA CCA GAT CAT TTG GAA ACA AAA GCT GAA ATG GAT AGA AGA ACT AGA ATT GGT TTG AGA GAA ATG TTT TCT TCA GTT AA < 800
E K D Q L W Q P D H L E T K A E M D R R T R I G L R E M F S S V N
710 720 730 740 750 760 770 780 790

C ACT ACA GAT AAA GTT ATT TCT TTA ACA TGT CAT TCA GAT GTT ATT GAA TCT ATT TTG AGA AAC ATC AAG CAT CCA GCT ATC GAT CAT TTG CAA ACT GGT < 900
T T D K V I S L T C H S D V I E S I L R N I K H P A I D H L Q T G
810 820 830 840 850 860 870 880 890

AAA TTG GTT TAC ACT GTT GTT GAA TTG TCT AAG GCT CCA GCA GAT GAT CAA TCA ATG TTG GTT GTT TCT TAA
K L V Y T V V E L S K A P A D D Q S M L V V S *
910 920 930 940 950 960 970

```

**Figure S4. Sequence of *PMU2/3* ancestor.** *CgPmu1-3* were aligned using a MUSCLE protein alignment. We identified every case where *CgPmu2* and *CgPmu3* had the same amino acid and it was different from *CgPmu1*. This identified 55 amino acids out of the 323 amino acids present in *CgPmu1*. We then ordered from GENEWIZ (South Plainfield, NJ) a synthetic sequence replacing codons in *CgPMU1* with a codon to put the *CgPmu2/3* codon in its place.

**Table S2. Strains used in this study.**

| Strain number            | Strain                                                                                       | Reference                        |
|--------------------------|----------------------------------------------------------------------------------------------|----------------------------------|
| <b>Yeast strains</b>     |                                                                                              |                                  |
| DG5                      | <i>C. glabrata</i> wild-type ( <i>his3-</i> ) (BG99)                                         | Cormack and Falkow Genetics 1999 |
| DG141                    | <i>Cgthi3::NATMX6</i> in DG5                                                                 | Iosue et al PlosOne 2016         |
| DG176                    | <i>C. glabrata</i> wild-type ( <i>his3-ura3-</i> )                                           | Iosue et al PlosOne 2016         |
| DG2                      | <i>Cgpha4::KANMX6</i> in DG5                                                                 | Kerwin and Wykoff Genetics 2009  |
| DC3                      | <i>S. cerevisiae</i> wild-type K699 <i>ade2-1 trp1-1 can1-100 leu2-3,112 his3-11,15 ura3</i> | Wykoff and O'Shea Genetics 2001  |
| DP1                      | <i>Schizosaccharomyces pombe</i> wild-type 972 h-                                            | From D. Moazed laboratory        |
| DG29                     | <i>Cgpmu2::NATMX6</i> in DG5                                                                 | Orkwis et al Genetics 2010       |
| DG30                     | <i>Cgpmu3::NATMX6</i> in DG5                                                                 | Orkwis et al Genetics 2010       |
| DG314                    | <i>Cgpmu3::CgURA3</i> in DG176                                                               | This study                       |
| DG320                    | <i>CgURA3::ScPHO3</i> in DG314                                                               | This study                       |
| DG318                    | <i>CgURA3::ScPHO5</i> in DG314                                                               | This study                       |
| DG327                    | <i>CgURA3::S. mikataePHO5 g5</i> in DG314                                                    | This study                       |
| DG328                    | <i>CgURA3::S. mikataePHO5 g4</i> in DG314                                                    | This study                       |
| DG332                    | <i>CgURA3::CgPMU1</i> in DG314                                                               | This study                       |
| DG317                    | <i>CgURA3::CgPMU2</i> in DG314                                                               | This study                       |
| DG345                    | <i>CgURA3:: Ancestral PMU2/3</i> in DG314                                                    | This study                       |
| DG319                    | <i>CgURA3::K. lactis KLLAO_C19338g</i> in DG314                                              | This study                       |
| DG373                    | <i>CgURA3::K. lactis KLLAO_D00258g</i> in DG314                                              | This study                       |
| DG326                    | <i>CgURA3:: S. kluyveriPHO5</i> in DG314                                                     | This study                       |
| DG331                    | <i>CgURA3::Y. lipolytica PHO5</i> in DG314                                                   | This study                       |
| DG329                    | <i>CgURA3::S. pombePHO1</i> in DG314                                                         | This study                       |
| DG330                    | <i>CgURA3::S. pombePHO4</i> in DG314                                                         | This study                       |
| DG338                    | <i>ScPHO5</i> p- <i>ScPHO 3-YFP</i> -pRS313 in DG29                                          | This study                       |
| DG337                    | <i>ScPHO5</i> p- <i>ScPHO5 -YFP</i> -pRS313 in DG29                                          | This study                       |
| DG335                    | <i>ScPHO5</i> p- <i>S. mikatae PHO5 g5 -YFP</i> -pRS313 in DG29                              | This study                       |
| DG336                    | <i>ScPHO5</i> p- <i>S. mikatae PHO5 g4 -YFP</i> -pRS313 in DG29                              | This study                       |
| DG200                    | <i>ScPHO5</i> p- <i>CgPMU1 -YFP</i> -pRS313 in DG29                                          | Orkwis et al Genetics 2010       |
| DG198                    | <i>ScPHO5</i> p- <i>CgPMU 2-YF P</i> -pRS313 in DG29                                         | Orkwis et al Genetics 2010       |
| DG199                    | <i>ScPHO5</i> p- <i>CgPMU3 -YFP</i> -pRS313 in DG29                                          | Orkwis et al Genetics 2010       |
| DG343                    | <i>ScPHO5</i> p- <i>Ancestral PMU2/3 -YFP</i> -pRS313 in DG29                                | This study                       |
| DG333                    | <i>ScPHO5</i> p- <i>K. lactis KLLAO_C19338g -YF P</i> -pRS313 in DG29                        | This study                       |
| DG367                    | <i>ScPHO5</i> p- <i>K. lactis KLLAO_D00258g -YFP</i> -pRS313 in DG29                         | This study                       |
| DG334                    | <i>ScPHO5</i> p- <i>S. Kluyveri PHO5 -YFP</i> -pRS313 in DG29                                | This study                       |
| DG341                    | <i>ScPHO5</i> p- <i>Y. lipolytica PHO5 -YFP</i> -pRS313 in DG29                              | This study                       |
| DG339                    | <i>ScPHO5</i> p- <i>S. pombe PHO1 -YFP</i> -pRS313 in DG29                                   | This study                       |
| DG340                    | <i>ScPHO5</i> p- <i>S. pombe PHO4 -YFP</i> -pRS313 in DG29                                   | This study                       |
| DG197                    | <i>ScPHO5</i> p- <i>YFP</i> - pRS313 in DG29                                                 | Orkwis et al Genetics 2010       |
| <b>Bacterial strains</b> |                                                                                              |                                  |
| DB346                    | 3 Kb <i>CgPMU2</i> p- <i>YFP</i> -pRS313                                                     | Kerwin and Wykoff FEMS 2012      |
| DB347                    | 1 Kb <i>CgPMU3</i> p- <i>YFP</i> -pRS313                                                     | This study                       |
| DB146                    | <i>ScPHO5</i> p- <i>YFP</i> -pRS313                                                          | Orkwis et al Genetics 2010       |
| DB147                    | <i>ScPHO5</i> p- <i>CgPMU2 -YFP</i> - pRS313                                                 | Orkwis et al Genetics 2010       |
| DB148                    | <i>ScPHO5</i> p- <i>CgPMU3 -YFP</i> -pRS313                                                  | Orkwis et al Genetics 2010       |

Table S3. Primers used in this study.

| Primers to Replace <i>CgPMU3</i> ORF with <i>CgURA3</i>                         |                                                                     |                                           |                                                                                                                                                                                                                                                                                 |                                        |
|---------------------------------------------------------------------------------|---------------------------------------------------------------------|-------------------------------------------|---------------------------------------------------------------------------------------------------------------------------------------------------------------------------------------------------------------------------------------------------------------------------------|----------------------------------------|
| DG314                                                                           | <i>Cgpmu3::CgURA3</i> in DG176                                      | O1858<br>O1859<br>O1905<br>O1906          | TGTCATCAGATATATCAAATATATATCCACTCTCGTTACacaggaacagctatgacc<br>ATGTAGACGGTGATCCTATTGATATAGATGATCGGAGTTgttgtaaacgacggccagt<br>TTA CTC TTA CTA GGT ATC AAT AG<br>GGTCATAGCTGTTCTCTGTG                                                                                               | Check Primer (5')<br>Check Primer (3') |
| Primers to Replace <i>CgURA3</i> in <i>Cgpmu3::CgURA3</i> with phosphatase ORFs |                                                                     |                                           |                                                                                                                                                                                                                                                                                 |                                        |
|                                                                                 | <i>CgURA3::CgPMU2</i> in DG314                                      | O1860<br>O1861                            | TGTCATCAGATATATCAAATATATATCCACTCTCGTTACaatgatcctcataaattgct<br>ATGTAGACGGTGATCCTATTGATATAGATGATCGGAGTTtaggatactacgatgaccg                                                                                                                                                       |                                        |
| DG317                                                                           | <i>CgURA3::ScPHO5</i> in DG314                                      | O1932<br>O1862<br>O1863                   | TTACTCAGAAAGGGACCAAC<br>TGTCATCAGATATATCAAATATATATCCACTCTCGTTACaatgtttaaactgtgttta<br>ATGTAGACGGTGATCCTATTGATATAGATGATCGGAGTTctattgtctcaatagactgg                                                                                                                               | Check Primer (5')                      |
| DG318                                                                           | <i>CgURA3::K. lactis KLLAO_C19338g</i> in DG314                     | O1933<br>O1935a<br>O1936a                 | CAACTTAAGTGGCGAATAC<br>TGTCATCAGATATATCAAATATATATCCACTCTCGTTACAaATTTATTATTACTCAC<br>ATGTAGACGGTGATCCTATTGATATAGATGATCGGAGTTTATTGTATTAGAAGTGATG                                                                                                                                  | Check Primer (5')                      |
| DG319                                                                           | <i>CgURA3::ScPHO3</i> in DG314                                      | O1937a<br>O1864                           | TAACTATCTCGTACTGTAG<br>TGTCATCAGATATATCAAATATATATCCACTCTCGTTACAatgtttaagtctgtgttta                                                                                                                                                                                              | Check Primer (5')                      |
| DG320                                                                           | <i>CgURA3::S. kluyveriPHO5</i> in DG314                             | O1865<br>O1934<br>O1938                   | ATGTAGACGGTGATCCTATTGATATAGATGATCGGAGTTtattgttttaaatagggtat<br>GTACGTTCTCAAGGTGCTC<br>TGTCATCAGATATATCAAATATATATCCACTCTCGTTACAaATGATTGGTTACCACTTTT                                                                                                                              | Check Primer (5')                      |
| DG326                                                                           | <i>CgURA3::S. mikataePHO5 g5</i> in DG314                           | O1939<br>O1940<br>O1941                   | ATGTAGACGGTGATCCTATTGATATAGATGATCGGAGTTTCAGTATGAAGCCAAGGTTA<br>ATCGAAAACTACTTGGCGAC<br>TGTCATCAGATATATCAAATATATATCCACTCTCGTTACAaATGTTCAAGTCTGTTGTTTA                                                                                                                            | Check Primer (5')                      |
| DG327                                                                           | <i>CgURA3::S. mikataePHO5 g4</i> in DG314                           | O1942<br>O1943<br>O1944                   | ATGTAGACGGTGATCCTATTGATATAGATGATCGGAGTTCTATTGCTTAGTAGAGTAC<br>ACGTTCCATTCTATGGGCAAC<br>TGTCATCAGATATATCAAATATATATCCACTCTCGTTACAaATGTTCAATTCGATTCTTTA                                                                                                                            | Check Primer (5')                      |
| DG328                                                                           | <i>CgURA3::S. pombePHO1</i> in DG314                                | O1945<br>O1946<br>O1979                   | ATGTAGACGGTGATCCTATTGATATAGATGATCGGAGTTCTATTGTCTCAGTAAACTG<br>GGTTTGGTTGAGTTTCACCC<br>TGTCATCAGATATATCAAATATATATCCACTCTCGTTACAatgtttctcaaaatttatt                                                                                                                               | Check Primer (5')                      |
| DG329                                                                           | <i>CgURA3::S. pombePHO4</i> in DG314                                | O1980<br>O1981<br>O1982                   | ATGTAGACGGTGATCCTATTGATATAGATGATCGGAGTTtaataaggataaacgacag<br>tcactgacaatactctgag<br>TGTCATCAGATATATCAAATATATATCCACTCTCGTTACAaagttaagtgtatttc                                                                                                                                   | Check Primer (5')                      |
| DG330                                                                           | <i>CgURA3::Y. lipolytica PHO5</i> in DG314                          | O1983<br>O1984<br>O1985                   | ATGTAGACGGTGATCCTATTGATATAGATGATCGGAGTTctaagctagtagtagcgg<br>gatcgaaggtattcttagc<br>TGTCATCAGATATATCAAATATATATCCACTCTCGTTACAatgacgaagtaaccgaaact                                                                                                                                | Check Primer (5')                      |
| DG331                                                                           | <i>CgURA3::CgPMU1</i> in DG314                                      | O1986<br>O1987<br>O1988                   | ATGTAGACGGTGATCCTATTGATATAGATGATCGGAGTTctacaactctccctgcaca<br>TAAGACCTTCCCTCTGGAAC<br>TGTCATCAGATATATCAAATATATATCCACTCTCGTTACAatgacctcacatagactgct                                                                                                                              | Check Primer (5')                      |
| DG332                                                                           | <i>CgURA3::Ancestral PMU2/3</i> in DG314                            | O1989<br>O1990<br>O2019                   | ATGTAGACGGTGATCCTATTGATATAGATGATCGGAGTTtatgacacaacagcattg<br>gtgcacacgtgtgatgaacg<br>TGTCATCAGATATATCAAATATATATCCACTCTCGTTACAaATGATCTTGATAGATTGTT                                                                                                                               | Check Primer (5')                      |
| DG345                                                                           | <i>CgURA3::K. lactis KLLAO_D00258g</i> in DG314                     | O2020<br>O2042<br>O2122                   | ATGTAGACGGTGATCCTATTGATATAGATGATCGGAGTTtaAGAAACAACCAACATTG<br>CATTGATGTTATTGAATC<br>TGTCATCAGATATATCAAATATATATCCACTCTCGTTACAaATGAAGCAGATCAAAACGCGAG                                                                                                                             | Check Primer (5')                      |
| DG373                                                                           | Primers to add homology for ntegration of phosphatase ORFs          | O2123<br>O2124<br>O1947<br>O1948<br>O1931 | ATGTAGACGGTGATCCTATTGATATAGATGATCGGAGTTTACTTGTACTAACGGGACCG<br>TTCTGTCCTATCGAGGAC<br>CATATATCATCTTAGCATTTGTTCTAGACTAAATGTTATTGTAGAAATCAAATACCAACTGTCATCAGATATATCAAAT<br>TTTTATGCAGTGAACCTTTAGCGAATGGATGAACAAAGAAACATAGACCCGGCTACCAATGTAGACGGTGATCCTATTG<br>ATGAACAAGAAACATAGACC | Check Primer (5')                      |
| Check for integration of phosphatase ORFs (3')                                  |                                                                     |                                           |                                                                                                                                                                                                                                                                                 |                                        |
| Primers to insert phosphatase ORFs into <i>ScPHO5</i> p-YFP -pRS313 plasmid     |                                                                     |                                           |                                                                                                                                                                                                                                                                                 |                                        |
|                                                                                 | <i>ScPHO5</i> p-K. <i>lactis</i> KLLAO_C19338g -YFP p-RS313 in DG29 | O2043<br>O2044<br>O1937a                  | caaatagacaagcaaatcgagattaccaATGAATTTATTATTACTCAC<br>accagtgaataattcttcacctttagacatTTATTGATTAGAGTGATG<br>TAACTATCTCGTACTGTAG                                                                                                                                                     | Check Primer (5')                      |
| DG333                                                                           | <i>ScPHO5</i> p-S. <i>kluyveri</i> PHO5 -YFP -pRS313 in DG29        | O2045<br>O2046<br>O1940                   | caaatagacaagcaaatcgagattaccaATGATTGGTTTACCATTTT<br>accagtgaataattcttcacctttagacatTCAGTATGAAGCCAAGGTTA<br>ATCGAAAACTACTTGGCGAC                                                                                                                                                   | Check Primer (5')                      |
| DG334                                                                           | <i>ScPHO5</i> p-S. <i>mikatae</i> PHO5 g5 -YFP -pRS313 in DG29      | O2047<br>O2048<br>O1943                   | caaatagacaagcaaatcgagattaccaATGTTCAAGTCTGTTGTTTA<br>accagtgaataattcttcacctttagacatCTATTGCTTTAGTAGAGTAC<br>ACGTTCCATTCTATGGGCAAC                                                                                                                                                 | Check Primer (5')                      |
| DG335                                                                           | <i>ScPHO5</i> p-S. <i>mikatae</i> PHO5 g4 -YFP -pRS313 in DG29      | O2049<br>O2050<br>O1946                   | caaatagacaagcaaatcgagattaccaATGTTCAATTCGATTCTTTA<br>accagtgaataattcttcacctttagacatCTATTGTCTCAGTAAACTG<br>GGTTTGGTTGAGTTTCACCC                                                                                                                                                   | Check Primer (5')                      |
| DG336                                                                           | <i>ScPHO5</i> p- <i>ScPHO5</i> -YFP -pRS313 in DG29                 | O2051<br>O2052<br>O1933                   | caaatagacaagcaaatcgagattaccaATGTTtaaatctgtgttta<br>accagtgaataattcttcacctttagacatctattgtctcaatagactgg<br>CAACTTAAGTGGCGAATAC                                                                                                                                                    | Check Primer (5')                      |
| DG337                                                                           | <i>ScPHO5</i> p- <i>ScPHO3</i> -YFP -pRS313 in DG29                 | O2053<br>O2054<br>O1934                   | caaatagacaagcaaatcgagattaccaatgtttaagtctgtgttta<br>accagtgaataattcttcacctttagacattattgtttaatagggtat<br>GTACGTTCTCAAGGTGCTC                                                                                                                                                      | Check Primer (5')                      |
| DG338                                                                           | <i>ScPHO5</i> p-S. <i>pombe</i> PHO1 -YFP -pRS313 in DG29           | O2055<br>O2056<br>O1981                   | caaatagacaagcaaatcgagattaccaATGttcttcaaaatttatt<br>accagtgaataattcttcacctttagacatttaataaggataaacgacag<br>tcactgacaatactctgag                                                                                                                                                    | Check Primer (5')                      |
| DG339                                                                           | <i>ScPHO5</i> p-S. <i>pombe</i> PHO4 -YFP -pRS313 in DG29           | O2057<br>O2058<br>O1984                   | caaatagacaagcaaatcgagattaccaATGaagttaagtgtatttc<br>accagtgaataattcttcacctttagacatcaagtctagtagtagcgg<br>gatcgaaggtattcttagc                                                                                                                                                      | Check Primer (5')                      |
| DG340                                                                           | <i>ScPHO5</i> p-Y. <i>lipolytica</i> PHO5 -YFP -pRS313 in DG29      | O2059<br>O2060<br>O1987                   | caaatagacaagcaaatcgagattaccaATGagcaagtaaccgaaact<br>accagtgaataattcttcacctttagacatctacaactctccctgcaca<br>TAAGACCTTCCCTCTGGAAC                                                                                                                                                   | Check Primer (5')                      |
| DG341                                                                           | <i>ScPHO5</i> p-Ancestral PMU2/3 -YFP -pRS313 in DG29               | O2066<br>O2067<br>O2042                   | caaatagacaagcaaatcgagattaccaATGATCTTGATAGATTGTT<br>accagtgaataattcttcacctttagacatTTAAGAAACAACCAACATTG<br>CATTGATGTTATTGAATC                                                                                                                                                     | Check Primer (5')                      |
| DG343                                                                           | <i>ScPHO5</i> p-K. <i>lactis</i> KLLAO_D00258g -YFP -pRS313 in DG29 | O2128<br>O2129<br>O2130                   | caaatagacaagcaaatcgagattaccaATGAAGCAGATCAAAACGCGAG<br>accagtgaataattcttcacctttagacatTTACTTGTACTAACGGGACCG<br>GGTTGCACCTCAGGTCACAG                                                                                                                                               | Check Primer (5')                      |
| DG367                                                                           | Check for integration of phosphatase ORFs (3')                      | O245                                      | GGGACAACACCAAGTGAATAATCTTCACC                                                                                                                                                                                                                                                   |                                        |
| Primers to put promoters in front of YFP                                        |                                                                     |                                           |                                                                                                                                                                                                                                                                                 |                                        |
|                                                                                 | 3 Kb <i>CgPMU2</i> p-YFP -pRS313                                    | O318A<br>O321                             | gggtggcgcgcgtctagaactagtgatccacttcttactctatcacttg<br>accagtgaataattcttcacctttagacattgtaacgagagtggatatt                                                                                                                                                                          |                                        |
| DB346                                                                           | 1 Kb <i>CgPMU3</i> p-YFP -pRS313                                    | O1479<br>O1478                            | gggtggcgcgcgtctagaactagtgatcgggctgacgtgtttacac<br>accagtgaataattcttcacctttagacattgtaacgagagtggatatt                                                                                                                                                                             |                                        |
| DB347                                                                           |                                                                     |                                           |                                                                                                                                                                                                                                                                                 |                                        |
| qPCR Primers                                                                    |                                                                     |                                           |                                                                                                                                                                                                                                                                                 |                                        |
| <i>ScPHO5</i>                                                                   | O151                                                                | TGCTTGTAACCTATGCTCTGC                     |                                                                                                                                                                                                                                                                                 |                                        |

|                |       |                               |
|----------------|-------|-------------------------------|
| <i>ScPHO3</i>  | O152  | TTGAGGTCAAGTTCAAACCT          |
|                | O2068 | GTAATGCGTGCCAGGATGG           |
|                | O2069 | ACGTACCAATTCATCTTCGG          |
| <i>ScACT1</i>  | O155  | TCCTACGAACTTCCAGATGGT         |
|                | O156  | GGCAGATTCCAAACCCAAA           |
| <i>CgPMU1</i>  | O191  | gtgcacacgtgtgatgaacgtg        |
|                | O192  | cattggtgatcatctgttaggc        |
| <i>CgPMU2</i>  | O664  | gtgatgttactgttcatttgattatcctg |
|                | O641  | gatacatcgatcacagtgtaaactag    |
| <i>CgPMU3</i>  | O195  | ctctagcagaataccaggatc         |
|                | O196  | ctacgagaattgattgatc           |
| <i>CgACT1</i>  | O75   | gaccaaaactactacaactcc         |
|                | O76   | ccactttcgtctattcttcttg        |
| <i>SpPHO1</i>  | O69   | gctaatagccttgcaaatccctc       |
|                | O70   | ctagcattgcaagagtgcaaaag       |
| <i>SpPHO4</i>  | O2070 | ccagtcgaggctgctctggg          |
|                | O2071 | gacattgcgagttaaaattag         |
| <i>SpACT1</i>  | O66   | ggtattcatgaggctacttacaac      |
|                | O67   | ccgctctcatcactcttcttg         |
| <i>CgTHI4</i>  | O1119 | ggacatgaacaatgccgaagc         |
|                | O1120 | ctcagcgaagtgttcaagat          |
| <i>CgTHI20</i> | O1285 | CTACATCAGGTTCTTCCCTA          |
|                | O1286 | ATTCTGTCAAAGGAACTTC           |
| <i>CgTHI10</i> | O1287 | CGTGGTTGGTGGTCTATGT           |
|                | O1288 | ATCCAGAGTTGTTGACCGTA          |
| <i>CgPET18</i> | O1291 | ACCCAGCTCTTATTCTTAC           |
|                | O1292 | TAGACTCACGTCCTATCTAC          |
| <i>CgTHI6</i>  | O1289 | ACATCGGCGTTGGTACATTA          |
|                | O1290 | TGTGGAATTGCAGCTAGATC          |

---
